# Supplementary material for: Low-dimensional encoding of decisions in parietal cortex reflects long-term training history
Source: Nat Commun. 2023 Feb 23;14:1010. doi: 10.1038/s41467-023-36554-5 (PMC9950136; doi:10.1038/s41467-023-36554-5)
Supplement: Supplementary file 4 — Source Data [file 41467_2023_36554_MOESM4_ESM.xlsx]

## Sheet: fig1b
Monkey B	Monkey J	Monkey D-discrimination	Monkey D-early	Monkey D-late	Monkey H-discrimination	Monkey H-early	Monkey H-late
0.796748	0.97861	0.860515	0.789389	0.874483	0.939453	0.906166	0.943434
0.953782	0.949807	0.876087	0.809524	0.869338	0.934884	0.942029	0.924731
0.9375	0.894737	0.878924	0.798574	0.889625	0.928433	0.895238	0.92986
0.981651	0.969432	0.853814	0.778614	0.844221	0.872483	0.93733	0.941452
0.92766	0.963415	0.875546	0.793834	0.880174	0.922414	0.934783	0.982456
0.880851	0.95671	0.881057	0.809346	0.87473	0.952663	0.936795	0.956897
0.909465	0.963801	0.824742	0.784247	0.943396	0.950178	0.935811	0.948598
0.905983	0.965066	0.862069	0.782609	0.922652	0.927342	0.93819	0.964602
0.918103	0.995516	0.904232	0.803787	0.95	0.933908	0.95	0.940774
0.959641	0.962025	0.871739	0.772388	0.949515	0.93913	0.939597	0.942982
0.97619	0.995455	0.909297	0.755556	0.913306	0.943396	0.938776	0.948198
0.963303	0.946188	0.896861	0.75	0.859287	0.945687	0.913978	0.960861
0.944681	0.986239	0.894855	0.803571	0.923423	0.959459	0.892473	0.953229
0.961702	0.969027	0.877637	0.76673	0.94508	0.957295	0.90293	0.95501
0.783688	0.991379	0.852878	0.790927	0.941432	0.915905	0.938462	0.95962
0.942222	0.977679	0.857434	0.769231	0.926702	0.901079	0.925926	0.952381
0.964602	0.986726	0.909297	0.758813	0.915743	0.912871	0.820144	0.88907
0.973799	0.990826	0.875274	0.784884	0.922747	0.941292	0.939516	0.88
0.833333	0.995455	0.865801	0.782074	0.927152	0.940678	0.896907	0.962472
0.946502	0.894273	0.862069	0.773764	0.950884	0.925	0.906977	0.9217
0.968468	0.956522	0.861856	0.773333	0.924779	0.945804	0.938931	0.954762
0.936073	0.977477	0.85	0.785137	0.924699	0.938619	0.931034	0.949367
0.943231	0.969432	0.879747	0.821705	0.878205	0.930481	0.896667	0.976293
0.880165	0.952586	0.860215	0.754682	0.932343	0.938095	0.948127	0.939954
0.986425	0.970213	0.866953	0.769811	0.893204	0.939063	0.954217	0.950237
0.988327	0.814545	0.861407	0.801181	0.916981	0.946746	0.858628	0.963942
	0.991031	0.888224	0.797938	0.939326	0.901869	0.922794	0.980723
		0.846311	0.778993	0.90835	0.956522	0.906667	0.969613
		0.827723	0.77037	0.944444	0.944118	0.936916	0.959716
		0.844211	0.810105	0.923241	0.94518	0.948357	0.955916
		0.879121	0.770522	0.922222	0.933628	0.9375	0.946009
		0.853125	0.753731	0.932563	0.914516	0.955631	0.943867
		0.85084	0.780193	0.942308	0.930636	0.895089	0.972516
		0.89002		0.850895	0.921875	0.928571	0.965831
		0.87257		0.923788	0.943299	0.874408	0.972103
		0.873134		0.915401	0.883534	0.88	0.916854
		0.883772		0.908397	0.947059	0.943548	0.948546
		0.893805		0.851852	0.949057	0.931694	0.934579
		0.873118		0.928241	0.919355	0.947222	0.94026
				0.907407	0.961905	0.865429	0.979452
				0.961995	0.913559		0.975824
				0.921053	0.941075		0.973301
				0.950092	0.961814		0.956322
				0.922465	0.930314		0.972603
				0.856031	0.944444		0.907965
				0.938947	0.957921		0.917864
				0.907127	0.963964		0.955959
				0.955189	0.93266		0.986985
				0.971175	0.940299		0.952381
				0.899103	0.92		0.959514
				0.842282	0.931398
				0.915984	0.925267
				0.922246	0.927481
				0.93578	0.910853
				0.915468	0.930636
				0.887734
				0.887574
				0.869848
				0.902893

## Sheet: fig2a
time from sample onset (ms)	discrimination top 67.5	discrimination top 112.5	discrimination top 157.5	discrimination top 202.5	discrimination top 247.5	discrimination top 292.5	discrimination top 337.5	discrimination top 22.5	discrimination bottom 67.5	discrimination bottom 112.5	discrimination bottom 157.5	discrimination bottom 202.5	discrimination bottom 247.5	discrimination bottom 292.5	discrimination bottom 337.5	discrimination bottom 22.5	category-late top 67.5	category-late top 112.5	category-late top 157.5	category-late top 202.5	category-late top 247.5	category-late top 292.5	category-late top 337.5	category-late top 22.5	category-late bottom 67.5	category-late bottom 112.5	category-late bottom 157.5	category-late bottom 202.5	category-late bottom 247.5	category-late bottom 292.5	category-late bottom 337.5	category-late bottom 22.5	category-only top 75.0	category-only top 135.0	category-only top 195.0	category-only top 255.0	category-only top 315.0	category-only top 15.0	category-only bottom 75.0	category-only bottom 135.0	category-only bottom 195.0	category-only bottom 255.0	category-only bottom 315.0	category-only bottom 15.0		time from test onset (ms)	discrimination top 67.5	discrimination top 112.5	discrimination top 157.5
-100	17.746	18.8566	15.3728	18.809	17.8164	14.9655	15.1803	18.4705	9.09751	8.67751	7.38849	7.48937	7.96601	5.87554	8.21967	6.92616	11.4032	14.3568	11.5811	10.8441	12.3761	12.0251	11.1251	10.4888	18.536	19.5981	18.1803	18.3713	18.7624	19.6936	20.7578	17.0256	3.35493	5.84138	5.33682	2.89281	5.45054	2.86273	10.1127	10.9447	10.9003	8.41307	10.5995	8.84088		-100	22.5192	20.8589	20.1318
-99	17.7905	18.9119	15.3954	18.8179	17.8276	15.0187	15.1734	18.5431	9.12021	8.62283	7.44439	7.47626	7.99083	5.88668	8.22266	6.88743	11.3887	14.3291	11.6099	10.8176	12.3956	11.9987	11.1261	10.4872	18.5989	19.6152	18.2127	18.3154	18.8505	19.7056	20.7306	17.0755	3.35876	5.88774	5.33925	2.86999	5.43036	2.88448	10.1086	10.9995	10.8875	8.39809	10.6433	8.88006		-99	22.4439	20.9131	20.0022
-98	17.833	18.9657	15.4204	18.8249	17.8371	15.0734	15.1687	18.6154	9.14075	8.56856	7.50122	7.46444	8.01441	5.89884	8.22472	6.84838	11.3756	14.302	11.6409	10.7902	12.4128	11.9721	11.128	10.4855	18.659	19.6329	18.2463	18.2605	18.9365	19.7181	20.7035	17.1267	3.36247	5.93359	5.34117	2.84761	5.40773	2.90726	10.1054	11.0532	10.8739	8.38212	10.6848	8.91911		-98	22.372	20.9687	19.8746
-97	17.8734	19.0179	15.4477	18.83	17.8449	15.1294	15.1663	18.6873	9.15913	8.51471	7.55888	7.45394	8.03673	5.91194	8.22582	6.80911	11.3636	14.2754	11.6739	10.7621	12.4276	11.9456	11.1307	10.4838	18.7163	19.6514	18.2811	18.2067	19.0203	19.731	20.6764	17.1791	3.36612	5.97894	5.34254	2.82569	5.38272	2.93096	10.103	11.1056	10.8597	8.36527	10.7239	8.95799		-97	22.3035	21.0258	19.7492
-96	17.9115	19.0686	15.4772	18.8334	17.8511	15.1869	15.1663	18.7589	9.17536	8.46133	7.61725	7.44483	8.05776	5.9259	8.22595	6.76978	11.3529	14.2495	11.7089	10.7334	12.44	11.9191	11.1343	10.4821	18.7706	19.6705	18.317	18.1541	19.1018	19.7444	20.6493	17.2328	3.36974	6.02374	5.34335	2.80428	5.3554	2.9555	10.1015	11.1568	10.845	8.34763	10.7604	8.99668		-96	22.2387	21.0841	19.6263
-95	17.9471	19.1178	15.5088	18.835	17.8558	15.2458	15.1686	18.8301	9.18945	8.40845	7.67623	7.43715	8.07747	5.94065	8.22511	6.73049	11.3435	14.2242	11.7459	10.7043	12.4499	11.8929	11.1386	10.4805	18.822	19.6901	18.3539	18.103	19.181	19.7583	20.6223	17.2876	3.37339	6.068	5.34356	2.78343	5.32586	2.98077	10.1008	11.2065	10.8298	8.3293	10.7944	9.03512		-95	22.1779	21.1436	19.5061
-94	17.9803	19.1654	15.5424	18.835	17.859	15.3061	15.1731	18.9009	9.20143	8.35609	7.73568	7.43095	8.09586	5.95611	8.22329	6.69138	11.3353	14.1995	11.7849	10.675	12.4573	11.867	11.1439	10.4788	18.8703	19.7102	18.3919	18.0533	19.2577	19.7726	20.5953	17.3435	3.37712	6.11169	5.34314	2.76316	5.29417	3.00667	10.1008	11.2547	10.8143	8.31038	10.8258	9.07328		-94	22.1211	21.2041	19.3889
-93	18.0109	19.2115	15.5779	18.8334	17.8607	15.3678	15.18	18.9711	9.21132	8.30429	7.79551	7.42627	8.11291	5.97217	8.22048	6.65257	11.3284	14.1754	11.8257	10.6456	12.4622	11.8414	11.15	10.4773	18.9155	19.7306	18.4308	18.0051	19.3318	19.7874	20.5684	17.4005	3.38097	6.15479	5.34207	2.74351	5.26043	3.03309	10.1016	11.3012	10.7985	8.29096	10.8545	9.11109		-93	22.0686	21.2657	19.2749
-92	18.0388	19.2561	15.6152	18.8303	17.8611	15.4309	15.1892	19.0408	9.21916	8.25307	7.85558	7.42316	8.12863	5.98876	8.21669	6.61418	11.3227	14.1519	11.8683	10.6163	12.4645	11.8164	11.1569	10.4758	18.9576	19.7513	18.4705	17.9586	19.4033	19.8025	20.5415	17.4585	3.38501	6.1973	5.34031	2.72451	5.22472	3.05992	10.1031	11.346	10.7824	8.27116	10.8806	9.14853		-92	22.0204	21.3281	19.1642
-91	18.0639	19.2993	15.6542	18.8258	17.8602	15.4954	15.2006	19.1099	9.22502	8.20244	7.91577	7.42167	8.14303	6.00578	8.21192	6.57633	11.3181	14.129	11.9126	10.5872	12.4642	11.792	11.1648	10.4744	18.9965	19.7723	18.511	17.9138	19.4721	19.818	20.5146	17.5176	3.38928	6.2392	5.33787	2.7062	5.18715	3.08704	10.1053	11.389	10.7661	8.25107	10.9039	9.18552		-91	21.9768	21.3913	19.0572
-90	18.0862	19.341	15.6947	18.8201	17.8581	15.5612	15.2142	19.1784	9.22893	8.15242	7.97597	7.42182	8.15612	6.02314	8.20618	6.53912	11.3147	14.1066	11.9587	10.5586	12.4613	11.7683	11.1735	10.4731	19.0324	19.7934	18.5521	17.8708	19.5381	19.8339	20.4879	17.5776	3.39383	6.28049	5.3347	2.6886	5.14781	3.11435	10.1082	11.43	10.7497	8.23079	10.9246	9.22202		-90	21.9378	21.4552	18.9539
-89	18.1055	19.3814	15.7367	18.8133	17.8549	15.6285	15.2299	19.2461	9.23096	8.10303	8.03604	7.42366	8.16793	6.04075	8.19948	6.50268	11.3124	14.0847	12.0064	10.5305	12.4557	11.7453	11.1832	10.472	19.065	19.8145	18.5939	17.8297	19.6014	19.85	20.4612	17.6385	3.39873	6.32116	5.33081	2.67174	5.10682	3.14172	10.1118	11.469	10.7332	8.21042	10.9426	9.25796		-89	21.9035	21.5196	18.8546
-88	18.1217	19.4204	15.78	18.8055	17.8506	15.6971	15.2478	19.313	9.23119	8.05428	8.09585	7.42722	8.17848	6.05851	8.19182	6.46711	11.3113	14.0633	12.0556	10.5032	12.4476	11.7232	11.1937	10.471	19.0946	19.8355	18.6362	17.7906	19.6618	19.8664	20.4345	17.7002	3.40402	6.36121	5.32618	2.65565	5.06428	3.16904	10.116	11.506	10.7166	8.19007	10.9579	9.29329		-88	21.8741	21.5844	18.7595
-87	18.135	19.4581	15.8245	18.7969	17.8454	15.7671	15.2677	19.3791	9.22968	8.00617	8.1553	7.43255	8.1878	6.07632	8.18324	6.4325	11.3111	14.0422	12.1064	10.4768	12.4368	11.7021	11.2052	10.4701	19.1211	19.8564	18.6789	17.7534	19.7193	19.883	20.4079	17.7628	3.40975	6.40062	5.3208	2.64034	5.0203	3.19618	10.1209	11.5409	10.7	8.16983	10.9706	9.32795		-87	21.8496	21.6496	18.6688
-86	18.1451	19.4947	15.8702	18.7877	17.8394	15.8384	15.2896	19.4442	9.22652	7.9587	8.21425	7.43966	8.19595	6.0941	8.17374	6.39895	11.312	14.0214	12.1585	10.4515	12.4234	11.682	11.2176	10.4694	19.1444	19.8771	18.722	17.7183	19.774	19.8998	20.3813	17.8262	3.41597	6.4394	5.31466	2.62584	4.975	3.22303	10.1264	11.5735	10.6835	8.14979	10.9807	9.36187		-86	21.83	21.7149	18.5825
-85	18.1521	19.5301	15.9168	18.7781	17.8327	15.911	15.3133	19.5082	9.2218	7.91189	8.27257	7.4486	8.20295	6.11175	8.16337	6.36654	11.3138	14.0008	12.212	10.4274	12.4075	11.6629	11.231	10.4688	19.1648	19.8975	18.7653	17.6853	19.8258	19.9167	20.3548	17.8903	3.42274	6.47754	5.30777	2.61216	4.9285	3.24948	10.1326	11.6039	10.667	8.13006	10.9883	9.395		-85	21.8154	21.7805	18.5009
-84	18.1559	19.5644	15.9643	18.7682	17.8254	15.985	15.339	19.5712	9.21559	7.86573	8.33016	7.45938	8.20887	6.12919	8.15213	6.33537	11.3164	13.9804	12.2668	10.4048	12.389	11.645	11.2454	10.4684	19.1821	19.9175	18.8087	17.6545	19.8747	19.9336	20.3283	17.9551	3.4301	6.51504	5.30013	2.59933	4.8809	3.2754	10.1395	11.632	10.6506	8.11072	10.9935	9.42727		-84	21.8058	21.846	18.4241
-83	18.1565	19.5977	16.0127	18.7582	17.8175	16.0603	15.3663	19.6331	9.20801	7.82022	8.38689	7.47203	8.21376	6.14632	8.14007	6.30551	11.32	13.9601	12.3228	10.3837	12.368	11.6282	11.2607	10.4682	19.1966	19.937	18.8522	17.6258	19.9207	19.9506	20.3019	18.0205	3.43808	6.55191	5.29174	2.58735	4.83234	3.30069	10.147	11.6577	10.6343	8.09185	10.9962	9.45862		-83	21.8012	21.9114	18.3523
-82	18.154	19.63	16.0617	18.7484	17.8093	16.1369	15.3953	19.6936	9.19914	7.77535	8.44264	7.48658	8.21767	6.16307	8.12723	6.27702	11.3242	13.9397	12.38	10.3644	12.3446	11.6127	11.2769	10.4681	19.2081	19.956	18.8957	17.5992	19.9638	19.9675	20.2754	18.0865	3.44674	6.58813	5.28261	2.57624	4.78294	3.32524	10.1553	11.6811	10.6181	8.07355	10.9967	9.48899		-82	21.8017	21.9767	18.2855
-81	18.1483	19.6615	16.1112	18.7389	17.8007	16.2148	15.4258	19.7528	9.18908	7.73112	8.4973	7.50303	8.22067	6.17934	8.11365	6.24998	11.3292	13.9192	12.4382	10.3469	12.3187	11.5986	11.2941	10.4683	19.2169	19.9744	18.9391	17.5749	20.0041	19.9842	20.2491	18.153	3.45612	6.62371	5.27276	2.566	4.73282	3.34894	10.1642	11.7021	10.602	8.05589	10.995	9.51832		-81	21.8072	22.0417	18.2238
-80	18.1395	19.6922	16.1613	18.7299	17.7921	16.294	15.4578	19.8106	9.17793	7.68752	8.55076	7.52142	8.22283	6.19507	8.09936	6.22443	11.3349	13.8984	12.4974	10.3315	12.2905	11.5857	11.3123	10.4685	19.223	19.9921	18.9824	17.5528	20.0416	20.0008	20.2227	18.22	3.46623	6.65865	5.26221	2.55665	4.6821	3.3717	10.1738	11.7207	10.586	8.03895	10.9912	9.54655		-80	21.8176	22.1063	18.1674
-79	18.1275	19.7221	16.2117	18.7218	17.7834	16.3744	15.4911	19.867	9.16581	7.64455	8.60291	7.54174	8.22421	6.21019	8.08443	6.20043	11.3412	13.8774	12.5575	10.3182	12.2601	11.5743	11.3315	10.469	19.2264	20.0091	19.0253	17.5329	20.0763	20.0171	20.1964	18.2874	3.47712	6.69295	5.25096	2.54818	4.6309	3.3934	10.1841	11.7369	10.5702	8.0228	10.9855	9.57363		-79	21.833	22.1704	18.1164
-78	18.1124	19.7514	16.2624	18.7146	17.7747	16.456	15.5256	19.9217	9.1528	7.60219	8.65365	7.56401	8.22489	6.22461	8.0689	6.17803	11.3479	13.8558	12.6185	10.3072	12.2274	11.5643	11.3516	10.4696	19.2273	20.0253	19.068	17.5152	20.1083	20.033	20.1701	18.3551	3.48882	6.72661	5.23906	2.54062	4.57936	3.41397	10.1951	11.7507	10.5546	8.0075	10.9779	9.59951		-78	21.8532	22.234	18.0708
-77	18.0943	19.7802	16.3133	18.7086	17.7663	16.5387	15.5613	19.9748	9.13903	7.56043	8.70289	7.58824	8.22493	6.23828	8.05283	6.15726	11.3552	13.8338	12.6803	10.2986	12.1926	11.5557	11.3726	10.4704	19.2257	20.0407	19.1102	17.4996	20.1376	20.0485	20.1437	18.4231	3.50133	6.75962	5.22653	2.53394	4.52759	3.43332	10.207	11.7621	10.5392	7.99312	10.9686	9.62413		-77	21.8782	22.297	18.0306
-76	18.0733	19.8084	16.3643	18.704	17.7583	16.6226	15.5979	20.0262	9.12458	7.51926	8.75052	7.61443	8.22441	6.25114	8.03628	6.13814	11.3628	13.8111	12.7428	10.2925	12.1557	11.5487	11.3945	10.4714	19.2218	20.0552	19.152	17.4863	20.1643	20.0636	20.1174	18.4914	3.5147	6.792	5.2134	2.52817	4.47572	3.45137	10.2195	11.7712	10.524	7.97972	10.9578	9.64745		-76	21.9079	22.3594	17.996
-75	18.0493	19.8363	16.4154	18.7011	17.7507	16.7076	15.6354	20.0758	9.10957	7.47868	8.79645	7.64258	8.2234	6.26314	8.01931	6.12072	11.3708	13.7876	12.8059	10.2891	12.1169	11.5431	11.4174	10.4725	19.2156	20.0688	19.1933	17.475	20.1884	20.0781	20.0911	18.5598	3.52891	6.82373	5.1997	2.52329	4.42387	3.46804	10.2329	11.7779	10.509	7.96735	10.9455	9.66943		-75	21.9423	22.4209	17.967
-74	18.0225	19.8637	16.4665	18.6999	17.7437	16.7937	15.6737	20.1235	9.0941	7.43867	8.84061	7.67268	8.22197	6.27423	8.00199	6.10499	11.3791	13.7633	12.8697	10.2884	12.0762	11.5391	11.4411	10.4739	19.2073	20.0815	19.234	17.4659	20.2101	20.0919	20.0648	18.6284	3.54399	6.85482	5.18549	2.51931	4.37217	3.48328	10.2472	11.7822	10.4942	7.95605	10.9321	9.69002		-74	21.9811	22.4817	17.9435
-73	17.993	19.8909	16.5174	18.7008	17.7373	16.8807	15.7126	20.1693	9.07826	7.39922	8.88291	7.70473	8.22021	6.28436	7.98438	6.09098	11.3876	13.738	12.934	10.2905	12.0337	11.5366	11.4656	10.4754	19.197	20.0933	19.2741	17.4588	20.2293	20.105	20.0385	18.6969	3.55994	6.88526	5.1708	2.51622	4.32073	3.49701	10.2622	11.7843	10.4797	7.94587	10.9175	9.7092		-73	22.0244	22.5416	17.9256
-72	17.9609	19.9179	16.5682	18.7039	17.7318	16.9687	15.752	20.2132	9.06216	7.36032	8.92329	7.73872	8.21817	6.29351	7.96656	6.0787	11.3962	13.7116	12.9988	10.2955	11.9896	11.5356	11.4909	10.477	19.1847	20.1041	19.3135	17.4538	20.2462	20.1174	20.0121	18.7654	3.57675	6.91505	5.15567	2.51402	4.26967	3.5092	10.2781	11.7842	10.4655	7.93684	10.902	9.72694		-72	22.072	22.6005	17.9134
-71	17.9262	19.9447	16.6188	18.7094	17.7273	17.0576	15.7918	20.255	9.04589	7.32196	8.96166	7.77464	8.21594	6.30164	7.94861	6.06814	11.405	13.6841	13.064	10.3035	11.9439	11.5363	11.517	10.4789	19.1707	20.1139	19.3522	17.4507	20.2609	20.1288	19.9857	18.8339	3.59443	6.9442	5.14017	2.5127	4.2191	3.51979	10.295	11.7819	10.4515	7.92899	10.8857	9.7432		-71	22.1238	22.6585	17.9068
-70	17.8891	19.9713	16.6692	18.7175	17.7238	17.1472	15.8319	20.2947	9.02955	7.28413	8.99798	7.81246	8.21358	6.30874	7.93059	6.0593	11.4138	13.6553	13.1295	10.3146	11.8967	11.5385	11.5437	10.4809	19.1549	20.1228	19.3902	17.4496	20.2734	20.1394	19.9592	18.9021	3.61295	6.97269	5.12433	2.51225	4.16915	3.52876	10.3127	11.7775	10.4379	7.92235	10.8689	9.75797		-70	22.1796	22.7155	17.9057
-69	17.8497	19.9979	16.7192	18.7283	17.7215	17.2376	15.8721	20.3324	9.01322	7.24684	9.03218	7.85218	8.21115	6.31477	7.91259	6.05218	11.4227	13.6251	13.1954	10.3287	11.8482	11.5423	11.5712	10.4832	19.1377	20.1308	19.4275	17.4503	20.2838	20.1489	19.9328	18.9701	3.63231	7.00053	5.10823	2.51268	4.11991	3.53607	10.3313	11.7711	10.4247	7.91694	10.8516	9.77125		-69	22.2393	22.7715	17.9102
-68	17.8081	20.0246	16.769	18.7421	17.7204	17.3287	15.9124	20.3679	8.99698	7.21006	9.06421	7.89375	8.20873	6.31975	7.89468	6.04675	11.4315	13.5935	13.2616	10.346	11.7985	11.5476	11.5992	10.4856	19.1189	20.1378	19.464	17.4528	20.2922	20.1574	19.9062	19.0377	3.65248	7.02771	5.09192	2.51397	4.07151	3.54171	10.3509	11.7627	10.4119	7.91277	10.8341	9.783		-68	22.3027	22.8264	17.9202
-67	17.7645	20.0512	16.8183	18.7589	17.7208	17.4203	15.9526	20.4012	8.98093	7.1738	9.09404	7.93717	8.20636	6.32365	7.87695	6.04301	11.4402	13.5603	13.328	10.3664	11.7477	11.5546	11.6277	10.4882	19.0989	20.1439	19.4997	17.457	20.2988	20.1647	19.8796	19.105	3.67344	7.05422	5.07546	2.51612	4.02404	3.54567	10.3715	11.7525	10.3995	7.90986	10.8166	9.79325		-67	22.3699	22.8803	17.9356
-66	17.719	20.0779	16.8673	18.7788	17.7226	17.5124	15.9926	20.4323	8.96512	7.13805	9.12162	7.98238	8.20412	6.32648	7.85948	6.04093	11.4488	13.5256	13.3945	10.39	11.6959	11.5631	11.6567	10.4911	19.0776	20.1491	19.5347	17.4629	20.3035	20.1708	19.8529	19.1717	3.69516	7.08007	5.05893	2.51911	3.97761	3.54795	10.393	11.7404	10.3876	7.9082	10.7991	9.80198		-66	22.4405	22.9331	17.9564
-65	17.6717	20.1047	16.9158	18.8021	17.726	17.605	16.0324	20.4613	8.94965	7.10282	9.14692	8.02937	8.20205	6.32826	7.84235	6.04049	11.4573	13.4892	13.4612	10.4168	11.6433	11.5731	11.6861	10.4942	19.0553	20.1535	19.5689	17.4703	20.3066	20.1757	19.8261	19.2379	3.7176	7.10525	5.04238	2.52295	3.93231	3.54854	10.4156	11.7267	10.3763	7.90781	10.7819	9.80921		-65	22.5144	22.9848	17.9826
-64	17.6228	20.1316	16.964	18.8288	17.731	17.6978	16.0718	20.488	8.93456	7.06811	9.16992	8.07809	8.2002	6.32898	7.82564	6.04166	11.4655	13.4511	13.528	10.4468	11.5899	11.5848	11.7158	10.4975	19.032	20.1571	19.6023	17.4793	20.3081	20.1792	19.7992	19.3035	3.74073	7.12975	5.02588	2.52762	3.88825	3.54748	10.4391	11.7114	10.3655	7.90866	10.7652	9.81495		-64	22.5915	23.0355	18.014
-63	17.5725	20.1587	17.0117	18.859	17.7379	17.7908	16.1108	20.5126	8.91993	7.03392	9.1906	8.1285	8.19861	6.32868	7.80943	6.04441	11.4736	13.4111	13.5949	10.48	11.536	11.5979	11.7458	10.5011	19.0079	20.1599	19.6349	17.4896	20.308	20.1814	19.7722	19.3683	3.7645	7.15358	5.00952	2.53312	3.84551	3.54477	10.4636	11.6946	10.3554	7.91077	10.749	9.81922		-63	22.6717	23.0851	18.0506
-62	17.5208	20.186	17.059	18.8927	17.7465	17.8839	16.1492	20.535	8.90581	7.00027	9.20896	8.18055	8.19734	6.32738	7.79381	6.04871	11.4814	13.3694	13.6617	10.5164	11.4815	11.6126	11.7758	10.5049	18.983	20.162	19.6669	17.5013	20.3066	20.1821	19.745	19.4324	3.78888	7.17672	4.99337	2.53944	3.80417	3.54046	10.4892	11.6764	10.346	7.91411	10.7337	9.82204		-62	22.7548	23.1337	18.0922
-61	17.468	20.2134	17.1059	18.9301	17.7571	17.9769	16.187	20.5552	8.89225	6.96715	9.22497	8.2342	8.19641	6.3251	7.77885	6.05452	11.4889	13.3258	13.7286	10.556	11.4268	11.6287	11.806	10.5091	18.9575	20.1635	19.6981	17.5143	20.3038	20.1814	19.7178	19.4956	3.81381	7.19917	4.9775	2.54657	3.76433	3.53457	10.5157	11.657	10.3374	7.91867	10.7192	9.82345		-61	22.8406	23.1812	18.1388
-60	17.4141	20.2411	17.1524	18.9711	17.7696	18.0698	16.2241	20.5733	8.87929	6.93459	9.23865	8.2894	8.19586	6.32189	7.76463	6.06181	11.4962	13.2803	13.7954	10.5986	11.3718	11.6464	11.8361	10.5135	18.9316	20.1644	19.7286	17.5284	20.2999	20.1791	19.6904	19.5578	3.83925	7.22094	4.962	2.55452	3.72605	3.52716	10.5432	11.6364	10.3297	7.92442	10.7058	9.82349		-60	22.9291	23.2279	18.1903
-59	17.3594	20.2689	17.1985	19.0159	17.7842	18.1625	16.2605	20.5894	8.86698	6.9026	9.25001	8.34608	8.19571	6.31777	7.75124	6.07055	11.5031	13.233	13.8621	10.6443	11.3167	11.6655	11.8661	10.5183	18.9052	20.1647	19.7585	17.5436	20.2948	20.1753	19.6628	19.619	3.86515	7.24202	4.94693	2.56327	3.68943	3.51829	10.5718	11.6148	10.3229	7.93136	10.6937	9.82218		-59	23.0201	23.2736	18.2466
-58	17.304	20.2969	17.2443	19.0643	17.8009	18.2547	16.2961	20.6034	8.85535	6.8712	9.25904	8.4042	8.19599	6.31279	7.73875	6.08069	11.5098	13.1837	13.9288	10.6931	11.2617	11.686	11.8959	10.5235	18.8786	20.1646	19.7877	17.5598	20.2887	20.1699	19.6352	19.6791	3.89145	7.26241	4.93239	2.57282	3.65451	3.508	10.6013	11.5922	10.317	7.93944	10.6829	9.81959		-58	23.1134	23.3184	18.3075
-57	17.2481	20.3251	17.2898	19.1164	17.8198	18.3465	16.3309	20.6155	8.84443	6.84041	9.26578	8.4637	8.19672	6.30701	7.72722	6.09219	11.5161	13.1324	13.9953	10.7447	11.2069	11.7079	11.9254	10.5291	18.8518	20.1642	19.8164	17.5768	20.2816	20.163	19.6073	19.7381	3.9181	7.28211	4.91845	2.58317	3.62138	3.49637	10.6317	11.5689	10.3123	7.94865	10.6736	9.81575		-57	23.2089	23.3625	18.3729
-56	17.1918	20.3535	17.335	19.1722	17.8409	18.4376	16.3649	20.6258	8.83423	6.81025	9.27025	8.5245	8.1979	6.30046	7.71674	6.10503	11.5222	13.0793	14.0616	10.7993	11.1524	11.7312	11.9545	10.5351	18.825	20.1634	19.8445	17.5947	20.2737	20.1543	19.5793	19.7958	3.94505	7.30113	4.90521	2.59433	3.59009	3.48348	10.6631	11.545	10.3087	7.95895	10.6659	9.81072		-56	23.3066	23.4058	18.4428
-55	17.1353	20.382	17.3799	19.2317	17.8642	18.528	16.3979	20.6342	8.82479	6.78077	9.27247	8.58654	8.19954	6.29319	7.70737	6.11915	11.5279	13.0243	14.1278	10.8566	11.0983	11.7558	11.9831	10.5415	18.7982	20.1624	19.8721	17.6134	20.2651	20.144	19.5511	19.8522	3.97224	7.31947	4.89273	2.60628	3.5607	3.46939	10.6955	11.5205	10.3064	7.97031	10.66	9.80456		-55	23.4062	23.4485	18.517
-54	17.0788	20.4107	17.4247	19.2947	17.8898	18.6174	16.4302	20.6409	8.81611	6.75197	9.27249	8.64977	8.20166	6.28528	7.69916	6.13452	11.5334	12.9675	14.1937	10.9167	11.0448	11.7816	12.011	10.5485	18.7716	20.1612	19.8992	17.6326	20.2557	20.1321	19.5228	19.9072	3.99963	7.33715	4.88111	2.61903	3.53326	3.45421	10.7287	11.4955	10.3054	7.98269	10.6558	9.79733		-54	23.5078	23.4905	18.5953
-53	17.0223	20.4395	17.4694	19.3612	17.9178	18.7059	16.4615	20.646	8.8082	6.72391	9.27034	8.7141	8.20425	6.27676	7.69219	6.1511	11.5385	12.9088	14.2594	10.9793	10.992	11.8087	12.0383	10.556	18.7452	20.1599	19.9259	17.6524	20.2457	20.1184	19.4943	19.9608	4.02716	7.35416	4.87043	2.63259	3.50782	3.43801	10.7628	11.4703	10.3058	7.99607	10.6536	9.7891		-53	23.6111	23.5321	18.6778
-52	16.9661	20.4684	17.5141	19.4312	17.9481	18.7933	16.4921	20.6496	8.80106	6.69662	9.26608	8.77946	8.20731	6.26771	7.68651	6.16886	11.5434	12.8483	14.3249	11.0445	10.94	11.8371	12.0648	10.564	18.7191	20.1586	19.9523	17.6727	20.2352	20.1031	19.4657	20.013	4.05479	7.37054	4.86078	2.64696	3.48443	3.4209	10.7976	11.445	10.3077	8.01041	10.6533	9.77992		-52	23.7161	23.5734	18.7641
-51	16.9102	20.4974	17.5587	19.5044	17.9808	18.8794	16.5218	20.6519	8.7947	6.67014	9.25974	8.84579	8.21082	6.25817	7.68216	6.18775	11.548	12.7861	14.39	11.1121	10.889	11.8665	12.0904	10.5726	18.6935	20.1574	19.9782	17.6934	20.2241	20.0861	19.4369	20.0635	4.08246	7.38629	4.85223	2.66215	3.46312	3.40297	10.8333	11.4196	10.3112	8.02567	10.6552	9.76988		-51	23.8226	23.6143	18.8544
-50	16.8549	20.5265	17.6034	19.581	18.016	18.9641	16.5508	20.6529	8.78912	6.64452	9.2514	8.913	8.21479	6.24822	7.67921	6.20774	11.5523	12.7223	14.4548	11.182	10.839	11.8971	12.1151	10.5819	18.6684	20.1563	20.0039	17.7144	20.2127	20.0674	19.4079	20.1125	4.11015	7.40145	4.84488	2.67816	3.44392	3.38433	10.8698	11.3944	10.3163	8.04181	10.6592	9.75904		-50	23.9308	23.6551	18.9483
-49	16.8003	20.5556	17.6483	19.6606	18.0535	19.0473	16.5791	20.6528	8.78429	6.6198	9.2411	8.98102	8.21919	6.23791	7.67768	6.2288	11.5564	12.6568	14.5193	11.254	10.7901	11.9287	12.1387	10.5918	18.6439	20.1554	20.0293	17.7356	20.2009	20.047	19.3789	20.1598	4.13781	7.41603	4.8388	2.695	3.42687	3.36509	10.9069	11.3693	10.3232	8.0588	10.6653	9.74747		-49	24.0403	23.6958	19.0459
-48	16.7466	20.5847	17.6935	19.7432	18.0936	19.129	16.6067	20.6518	8.78022	6.59605	9.22891	9.04977	8.22401	6.2273	7.67762	6.25089	11.5604	12.5899	14.5835	11.3281	10.7426	11.9613	12.1611	10.6025	18.6201	20.1547	20.0544	17.7569	20.1887	20.0249	19.3497	20.2055	4.16541	7.43006	4.83408	2.7127	3.41199	3.34536	10.9446	11.3446	10.3319	8.07661	10.6737	9.73524		-48	24.1512	23.7366	19.147
-47	16.6938	20.6138	17.739	19.8286	18.1361	19.209	16.6338	20.65	8.77689	6.5733	9.21491	9.11917	8.22924	6.21645	7.67907	6.27397	11.5641	12.5216	14.6472	11.4041	10.6965	11.9948	12.1823	10.6139	18.5971	20.1544	20.0794	17.7784	20.1764	20.0012	19.3204	20.2494	4.19292	7.4436	4.83079	2.73125	3.39932	3.32525	10.983	11.3203	10.3425	8.09519	10.6844	9.72244		-47	24.2635	23.7777	19.2515
-46	16.6422	20.6428	17.7849	19.9168	18.1811	19.2872	16.6605	20.6475	8.77428	6.55163	9.19917	9.18915	8.23484	6.20543	7.68203	6.29803	11.5676	12.4519	14.7105	11.4819	10.6519	12.0292	12.2023	10.6261	18.5749	20.1545	20.1042	17.7998	20.1638	19.9758	19.291	20.2917	4.22033	7.45667	4.82902	2.75067	3.38885	3.30488	11.0219	11.2967	10.355	8.11452	10.6973	9.70913		-46	24.3771	23.8191	19.3593
-45	16.5918	20.6718	17.8313	20.0074	18.2287	19.3635	16.6869	20.6446	8.77238	6.53109	9.18176	9.25962	8.2408	6.1943	7.68655	6.32303	11.5711	12.381	14.7734	11.5613	10.6089	12.0644	12.2208	10.6392	18.5537	20.1551	20.1288	17.8212	20.151	19.9488	19.2616	20.3321	4.24762	7.46934	4.82885	2.77098	3.38062	3.28437	11.0613	11.2737	10.3695	8.13456	10.7126	9.69539		-45	24.4919	23.861	19.4704
-44	16.5428	20.7007	17.8784	20.1005	18.2788	19.4379	16.713	20.6414	8.77117	6.51176	9.16277	9.33051	8.24711	6.18311	7.69263	6.34894	11.5744	12.3089	14.8358	11.6423	10.5676	12.1003	12.2379	10.6531	18.5334	20.1561	20.1534	17.8425	20.138	19.9202	19.2322	20.3708	4.27478	7.48165	4.83034	2.79221	3.37463	3.26385	11.1011	11.2515	10.3861	8.15528	10.7301	9.68128		-44	24.608	23.9035	19.5846
-43	16.4954	20.7296	17.9262	20.1958	18.3315	19.5103	16.7391	20.6381	8.77063	6.49369	9.14229	9.40173	8.25372	6.17192	7.70029	6.37574	11.5776	12.2359	14.8977	11.7246	10.5282	12.1369	12.2536	10.668	18.5142	20.1577	20.1778	17.8636	20.125	19.8899	19.2028	20.4076	4.30182	7.49366	4.83358	2.81435	3.37089	3.24342	11.1412	11.2302	10.4049	8.17665	10.7499	9.66689		-43	24.7252	23.947	19.7019
-42	16.4497	20.7583	17.9748	20.2931	18.3868	19.5806	16.7652	20.6349	8.77074	6.47697	9.12039	9.47321	8.26063	6.16079	7.70952	6.4034	11.5809	12.162	14.9591	11.8082	10.4907	12.1741	12.2677	10.6837	18.4962	20.1599	20.2022	17.8844	20.1119	19.8582	19.1734	20.4427	4.32875	7.50546	4.83864	2.83745	3.3694	3.22323	11.1817	11.2099	10.4258	8.19864	10.7719	9.65227		-42	24.8437	23.9914	19.8222
-41	16.4058	20.787	18.0244	20.3924	18.4447	19.6488	16.7917	20.632	8.77147	6.46167	9.09718	9.54486	8.26781	6.14977	7.72033	6.4319	11.584	12.0874	15.0198	11.8929	10.4552	12.2118	12.2802	10.7005	18.4794	20.1628	20.2264	17.905	20.0987	19.8249	19.1442	20.476	4.3556	7.51711	4.84557	2.86152	3.37017	3.2034	11.2224	11.1908	10.4488	8.22124	10.7962	9.63751		-41	24.9634	24.037	19.9455
-40	16.3639	20.8155	18.0751	20.4933	18.5053	19.7149	16.8185	20.6296	8.77282	6.44788	9.07274	9.61662	8.27523	6.1389	7.73272	6.46122	11.5872	12.0121	15.08	11.9785	10.4218	12.2499	12.291	10.7183	18.4638	20.1663	20.2506	17.9252	20.0854	19.7901	19.1151	20.5075	4.38238	7.5287	4.85447	2.88657	3.37319	3.18405	11.2633	11.1728	10.4741	8.2444	10.8226	9.62266		-40	25.0843	24.0839	20.0718
-39	16.3242	20.844	18.127	20.5958	18.5685	19.7788	16.8461	20.628	8.77477	6.43567	9.04719	9.68841	8.28288	6.12825	7.74666	6.49135	11.5905	11.9363	15.1395	12.065	10.3906	12.2884	12.3003	10.7371	18.4496	20.1704	20.2748	17.9451	20.0721	19.7538	19.0862	20.5372	4.40914	7.54033	4.86537	2.91265	3.37847	3.16531	11.3042	11.1561	10.5017	8.26812	10.8512	9.6078		-39	25.2064	24.1324	20.2009
-38	16.2866	20.8724	18.1802	20.6998	18.6346	19.8406	16.8744	20.6273	8.7773	6.42514	9.02062	9.76015	8.29074	6.11786	7.76214	6.52225	11.5938	11.8601	15.1984	12.1521	10.3617	12.3271	12.3078	10.7569	18.4367	20.1753	20.2988	17.9646	20.0588	19.7161	19.0575	20.5651	4.43595	7.5521	4.87836	2.93977	3.38599	3.14731	11.3452	11.1408	10.5315	8.29237	10.8819	9.59297		-38	25.3298	24.1827	20.3329
-37	16.2515	20.9007	18.2348	20.805	18.7034	19.9002	16.9038	20.6278	8.78039	6.41638	8.99314	9.83177	8.29878	6.10776	7.77914	6.55392	11.5972	11.7837	15.2565	12.2397	10.3351	12.366	12.3137	10.7779	18.4253	20.1809	20.3228	17.9836	20.0454	19.677	19.0292	20.5914	4.46285	7.56412	4.89349	2.96795	3.39575	3.13019	11.3862	11.1269	10.5635	8.31714	10.9145	9.57825		-37	25.4545	24.2349	20.4677
-36	16.219	20.929	18.2911	20.9112	18.775	19.9577	16.9346	20.6298	8.78404	6.40948	8.96485	9.9032	8.30701	6.098	7.79762	6.58635	11.6008	11.7073	15.3139	12.3278	10.311	12.4051	12.3178	10.8	18.4153	20.1873	20.3466	18.0021	20.032	19.6365	19.0012	20.6159	4.48992	7.57652	4.91081	2.99723	3.40774	3.11407	11.427	11.1145	10.5978	8.34242	10.9491	9.56368		-36	25.5805	24.2892	20.6054
-35	16.1891	20.9573	18.349	21.0185	18.8496	20.0132	16.9668	20.6334	8.78825	6.40455	8.93587	9.97438	8.3154	6.08863	7.81756	6.61952	11.6045	11.6309	15.3705	12.4161	10.2893	12.4441	12.3203	10.8232	18.4069	20.1943	20.3704	18.0201	20.0186	19.5946	18.9737	20.6388	4.51727	7.58943	4.93037	3.02763	3.42194	3.09909	11.4677	11.1036	10.6342	8.36818	10.9856	9.54932		-35	25.7079	24.3459	20.746
-34	16.1622	20.9858	18.4089	21.1266	18.9272	20.0667	17.0009	20.639	8.79302	6.40169	8.90632	10.0452	8.32395	6.07967	7.83891	6.65343	11.6084	11.5547	15.4263	12.5045	10.2703	12.4831	12.3211	10.8475	18.4001	20.2021	20.3939	18.0376	20.0052	19.5515	18.9468	20.66	4.54497	7.60299	4.95223	3.05918	3.43834	3.08537	11.5082	11.0944	10.6729	8.39444	11.0238	9.53523		-34	25.8368	24.4052	20.8895
-33	16.1382	21.0143	18.4707	21.2354	19.0078	20.1183	17.0371	20.6467	8.79834	6.40101	8.87631	10.1157	8.33264	6.07115	7.86162	6.68806	11.6125	11.4788	15.4811	12.5929	10.2538	12.522	12.3203	10.873	18.3949	20.2106	20.4173	18.0545	19.9918	19.5071	18.9204	20.6797	4.57316	7.61735	4.97644	3.09191	3.45692	3.07306	11.5483	11.0869	10.7136	8.42117	11.0637	9.52144		-33	25.9671	24.4673	21.0359
-32	16.1175	21.0431	18.5348	21.3449	19.0916	20.1681	17.0756	20.6569	8.80423	6.40262	8.84597	10.1857	8.34149	6.06311	7.88565	6.72342	11.6168	11.4034	15.5351	12.6812	10.2401	12.5606	12.3179	10.8996	18.3914	20.2197	20.4405	18.0709	19.9783	19.4615	18.8948	20.6979	4.60196	7.63267	5.00303	3.12583	3.47767	3.06229	11.5881	11.0811	10.7564	8.44837	11.1051	9.508		-32	26.0991	24.5325	21.1852
-31	16.1001	21.0722	18.6011	21.4548	19.1787	20.2163	17.1168	20.6697	8.81071	6.40665	8.81542	10.2553	8.35049	6.05557	7.91095	6.75949	11.6213	11.3287	15.588	12.7693	10.2291	12.5989	12.3138	10.9274	18.3896	20.2295	20.4634	18.0867	19.9648	19.4148	18.8699	20.7147	4.63151	7.64914	5.03204	3.16099	3.50058	3.05319	11.6274	11.0771	10.8013	8.47605	11.1481	9.49495		-31	26.2326	24.6009	21.3376
-30	16.0863	21.1016	18.6699	21.5653	19.2691	20.2629	17.1609	20.6855	8.81779	6.41322	8.78478	10.3243	8.35965	6.04856	7.93746	6.79628	11.6262	11.2547	15.64	12.8569	10.2209	12.6368	12.3083	10.9564	18.3895	20.24	20.486	18.102	19.9513	19.3668	18.8459	20.73	4.66197	7.66694	5.06351	3.19739	3.52561	3.0459	11.6663	11.0749	10.848	8.50421	11.1923	9.48233		-30	26.368	24.6728	21.493
-29	16.0762	21.1316	18.7414	21.6761	19.363	20.3081	17.2083	20.7046	8.82552	6.42245	8.7542	10.3926	8.36897	6.04209	7.96511	6.83378	11.6313	11.1816	15.6909	12.9441	10.2155	12.6742	12.3013	10.9865	18.3912	20.251	20.5082	18.1167	19.9378	19.3178	18.8229	20.7441	4.69351	7.68626	5.09748	3.23508	3.55276	3.04057	11.7045	11.0745	10.8966	8.53285	11.2379	9.47018		-29	26.5051	24.7485	21.6516
-28	16.07	21.1622	18.8156	21.7872	19.4604	20.3522	17.2594	20.7272	8.83391	6.43448	8.7238	10.4604	8.37848	6.03618	7.99385	6.872	11.6367	11.1095	15.7406	13.0308	10.2129	12.711	12.2929	11.0177	18.3948	20.2625	20.53	18.1309	19.9242	19.2677	18.8009	20.7569	4.72631	7.7073	5.13397	3.27406	3.582	3.03733	11.7422	11.0759	10.9468	8.56197	11.2846	9.45852		-28	26.6441	24.8281	21.8134
-27	16.068	21.1936	18.8929	21.8987	19.5617	20.3953	17.3143	20.7536	8.84304	6.44944	8.69373	10.5274	8.38819	6.03085	8.02359	6.91094	11.6425	11.0386	15.7892	13.1167	10.2133	12.7473	12.2832	11.05	18.4002	20.2745	20.5513	18.1445	19.9105	19.2166	18.7802	20.7686	4.76057	7.7303	5.173	3.31437	3.61332	3.03632	11.7792	11.0792	10.9987	8.59159	11.3323	9.44739		-27	26.7851	24.912	21.9786
-26	16.0703	21.2259	18.9732	22.0104	19.6668	20.4377	17.3735	20.7841	8.85293	6.46748	8.66412	10.5938	8.39812	6.02611	8.05429	6.9506	11.6485	10.9689	15.8366	13.2018	10.2166	12.7828	12.2722	11.0834	18.4074	20.287	20.5721	18.1575	19.8968	19.1645	18.7607	20.7793	4.79651	7.75548	5.21461	3.35602	3.64668	3.0377	11.8155	11.0844	11.0521	8.62171	11.3809	9.43681		-26	26.9282	25.0004	22.1472
-25	16.0772	21.2592	19.0569	22.1225	19.7759	20.4796	17.4373	20.819	8.86367	6.48875	8.63513	10.6593	8.4083	6.02196	8.08585	6.99101	11.6549	10.9007	15.8827	13.2861	10.2229	12.8176	12.2602	11.1178	18.4166	20.2998	20.5923	18.1701	19.8831	19.1115	18.7426	20.7889	4.83436	7.78309	5.2588	3.39903	3.68208	3.04161	11.8509	11.0914	11.1069	8.65234	11.4303	9.42681		-25	27.0735	25.0935	22.3194
-24	16.0888	21.2938	19.144	22.2349	19.8893	20.5213	17.5061	20.8586	8.87532	6.51341	8.6069	10.7241	8.41875	6.01842	8.1182	7.03216	11.6617	10.8339	15.9275	13.3694	10.2322	12.8516	12.2471	11.1533	18.4277	20.3129	20.6118	18.1821	19.8693	19.0576	18.7259	20.7977	4.87436	7.81337	5.30561	3.44341	3.71949	3.04819	11.8856	11.1003	11.1628	8.68351	11.4804	9.41741		-24	27.221	25.1916	22.4952
-23	16.1055	21.3299	19.2348	22.3477	20.007	20.563	17.5802	20.9032	8.88797	6.54161	8.57958	10.7881	8.42952	6.01549	8.15128	7.07408	11.6687	10.7688	15.9709	13.4516	10.2444	12.8847	12.2331	11.1897	18.4408	20.3263	20.6306	18.1937	19.8555	19.0029	18.711	20.8057	4.91676	7.84658	5.35502	3.48918	3.75888	3.05762	11.9194	11.1111	11.2198	8.71521	11.5311	9.40863		-23	27.3709	25.2949	22.6749
-22	16.1274	21.3677	19.3295	22.4609	20.1294	20.6052	17.66	20.953	8.9017	6.57351	8.55334	10.8512	8.44063	6.01316	8.18499	7.11677	11.6761	10.7054	16.0129	13.5327	10.2597	12.9169	12.2183	11.2271	18.4558	20.3398	20.6485	18.2048	19.8417	18.9474	18.6977	20.8129	4.96184	7.88302	5.40707	3.53635	3.80025	3.07004	11.9522	11.1236	11.2777	8.74748	11.5822	9.4005		-22	27.5233	25.4037	22.8586
-21	16.1548	21.4073	19.4282	22.5746	20.2564	20.648	17.7459	21.0085	8.91662	6.6093	8.52833	10.9135	8.45214	6.01144	8.21927	7.16026	11.6838	10.6439	16.0535	13.6127	10.2779	12.9482	12.2029	11.2653	18.4729	20.3534	20.6656	18.2155	19.8279	18.8911	18.6863	20.8196	5.00989	7.92296	5.46175	3.58492	3.84356	3.08561	11.9841	11.138	11.3364	8.78032	11.6336	9.39303		-21	27.6782	25.5183	23.0464
-20	16.188	21.449	19.5312	22.689	20.3885	20.6919	17.8383	21.0699	8.93285	6.64915	8.50473	10.9749	8.46407	6.01032	8.25403	7.20456	11.6919	10.5842	16.0925	13.6914	10.2992	12.9784	12.187	11.3044	18.492	20.367	20.6817	18.2259	19.8141	18.8342	18.6768	20.8258	5.0612	7.9667	5.51907	3.6349	3.88881	3.10451	12.0149	11.1542	11.3955	8.81375	11.6853	9.38624		-20	27.8358	25.6389	23.2384
-19	16.2272	21.4931	19.6385	22.8042	20.5257	20.7372	17.9374	21.1374	8.9505	6.69323	8.48269	11.0354	8.47648	6.00979	8.2892	7.2497	11.7002	10.5265	16.13	13.7688	10.3234	13.0077	12.1707	11.3442	18.5131	20.3805	20.6968	18.2359	19.8004	18.7766	18.6695	20.8316	5.11609	8.01454	5.57902	3.68628	3.93596	3.1269	12.0448	11.1722	11.4551	8.8478	11.737	9.38015		-19	27.9961	25.7657	23.4349
-18	16.2728	21.5399	19.7505	22.9202	20.6683	20.7843	18.0437	21.2115	8.96971	6.74175	8.4624	11.095	8.48941	6.00985	8.32469	7.2957	11.7089	10.4709	16.1659	13.8448	10.3507	13.0359	12.1542	11.3848	18.5362	20.3939	20.7108	18.2456	19.7867	18.7185	18.6643	20.837	5.17488	8.06681	5.64162	3.73907	3.985	3.15296	12.0735	11.1918	11.5148	8.88247	11.7888	9.37478		-18	28.1592	25.8991	23.636
-17	16.3249	21.5895	19.8672	23.0373	20.8164	20.8335	18.1577	21.2925	8.99062	6.79489	8.44404	11.1537	8.50291	6.01049	8.36044	7.34259	11.7179	10.4174	16.2001	13.9194	10.3809	13.0631	12.1376	11.426	18.5614	20.407	20.7237	18.2551	19.7732	18.6599	18.6615	20.8423	5.23791	8.12384	5.70685	3.79325	4.0359	3.18286	12.1012	11.2132	11.5746	8.91779	11.8404	9.37014		-17	28.3252	26.0392	23.8419
-16	16.3839	21.6424	19.989	23.1556	20.9705	20.8854	18.2795	21.3806	9.01339	6.85286	8.42778	11.2116	8.51704	6.01168	8.39635	7.3904	11.7271	10.3661	16.2327	13.9927	10.4141	13.0892	12.1212	11.4677	18.5887	20.4198	20.7353	18.2643	19.7598	18.6008	18.6611	20.8474	5.30554	8.18595	5.77471	3.8488	4.08866	3.2168	12.1277	11.2362	11.6341	8.95378	11.8919	9.36626		-16	28.4942	26.1862	24.0527
-15	16.4502	21.6987	20.116	23.2753	21.1305	20.9403	18.4097	21.4762	9.03818	6.91585	8.41381	11.2685	8.53183	6.01343	8.43237	7.43917	11.7366	10.3171	16.2635	14.0644	10.4502	13.1143	12.105	11.5099	18.618	20.4322	20.7456	18.2734	19.7466	18.5415	18.6633	20.8525	5.37812	8.25349	5.84519	3.90572	4.14325	3.25497	12.1531	11.2607	11.6932	8.99045	11.943	9.36315		-15	28.6663	26.3405	24.2686
-14	16.5239	21.7589	20.2483	23.3967	21.2969	20.9987	18.5486	21.5796	9.06517	6.9841	8.40232	11.3245	8.54735	6.01571	8.46841	7.48893	11.7463	10.2703	16.2925	14.1347	10.4891	13.1384	12.0894	11.5526	18.6495	20.4441	20.7546	18.2824	19.7337	18.4818	18.6681	20.8577	5.45604	8.32682	5.91829	3.96397	4.19966	3.29755	12.1773	11.2868	11.7517	9.02783	11.9938	9.36084		-14	28.8415	26.5023	24.4898
-13	16.6054	21.8232	20.3862	23.5199	21.4697	21.0609	18.6966	21.6911	9.09454	7.0578	8.39351	11.3796	8.56363	6.01849	8.50441	7.53972	11.7562	10.2258	16.3197	14.2034	10.531	13.1615	12.0743	11.5956	18.683	20.4555	20.7621	18.2913	19.7212	18.422	18.6758	20.8631	5.53966	8.40629	5.99398	4.02354	4.25785	3.34476	12.2003	11.3144	11.8094	9.06592	12.0441	9.35935		-13	29.0199	26.6718	24.7164
-12	16.6951	21.892	20.53	23.6451	21.6494	21.1276	18.854	21.811	9.12649	7.13718	8.38757	11.4339	8.58073	6.02177	8.5403	7.59157	11.7662	10.1837	16.3451	14.2707	10.5756	13.1837	12.0602	11.6388	18.7186	20.4661	20.7682	18.3002	19.7091	18.3621	18.6864	20.8687	5.62939	8.49228	6.07227	4.08438	4.31782	3.39679	12.2221	11.3434	11.8661	9.10475	12.0938	9.3587		-12	29.2016	26.8491	24.9487
-11	16.7932	21.9656	20.6797	23.7727	21.836	21.199	19.0212	21.9397	9.16122	7.22247	8.38471	11.4872	8.5987	6.02552	8.576	7.64453	11.7765	10.1439	16.3687	14.3364	10.623	13.205	12.047	11.6823	18.7562	20.4761	20.7727	18.3091	19.6975	18.3022	18.7001	20.8747	5.72563	8.58514	6.15312	4.14645	4.37955	3.45386	12.2427	11.3737	11.9215	9.14432	12.1428	9.35892		-11	29.3865	27.0346	25.1867
-10	16.9001	22.0444	20.8356	23.9029	22.0298	21.2758	19.1985	22.0774	9.19894	7.31391	8.38513	11.5397	8.61757	6.0297	8.61147	7.69864	11.7868	10.1064	16.3903	14.4005	10.6731	13.2255	12.0351	11.7258	18.796	20.4852	20.7757	18.3181	19.6864	18.2424	18.7169	20.8811	5.82879	8.68526	6.23654	4.20972	4.44302	3.51619	12.2622	11.4053	11.9756	9.18466	12.1912	9.36003		-10	29.5748	27.2284	25.4307
-9	17.0161	22.1287	20.9978	24.0359	22.231	21.3583	19.3863	22.2244	9.23986	7.41171	8.38904	11.5913	8.6374	6.03431	8.64663	7.75396	11.7972	10.0714	16.4099	14.4632	10.7259	13.2452	12.0246	11.7693	18.8378	20.4935	20.7771	18.3273	19.6761	18.1829	18.737	20.8881	5.93927	8.79302	6.32251	4.27414	4.5082	3.584	12.2804	11.4382	12.028	9.22577	12.2387	9.36206		-9	29.7665	27.4307	25.6808
-8	17.1414	22.2189	21.1666	24.172	22.4399	21.447	19.585	22.3811	9.28423	7.51613	8.39666	11.6421	8.65822	6.0393	8.68144	7.81052	11.8077	10.0386	16.4277	14.5242	10.7812	13.2642	12.0158	11.8128	18.8817	20.5008	20.7768	18.3368	19.6666	18.1238	18.7606	20.8956	6.05751	8.9088	6.411	4.33964	4.57508	3.65753	12.2974	11.4721	12.0786	9.26767	12.2854	9.36505		-8	29.9616	27.6416	25.9372
-7	17.2766	22.3154	21.3422	24.3114	22.6566	21.5425	19.7947	22.5477	9.33226	7.62741	8.40819	11.6921	8.68005	6.04465	8.71584	7.86838	11.8181	10.0082	16.4434	14.5838	10.8391	13.2827	12.0088	11.8561	18.9276	20.507	20.7749	18.3465	19.6579	18.0651	18.7876	20.9039	6.18393	9.03299	6.50199	4.40616	4.64363	3.73699	12.3133	11.5072	12.1273	9.31036	12.3311	9.36903		-7	30.1601	27.8614	26.1999
-6	17.4217	22.4185	21.5246	24.4545	22.8815	21.6451	20.016	22.7245	9.38421	7.74578	8.42385	11.7412	8.70295	6.05032	8.74978	7.92758	11.8286	9.98011	16.4572	14.6418	10.8994	13.3007	12.0038	11.8992	18.9756	20.5123	20.7713	18.3565	19.6504	18.0071	18.8183	20.9129	6.31895	9.16596	6.59548	4.47365	4.71384	3.82262	12.3279	11.5432	12.1737	9.35385	12.3759	9.37404		-6	30.362	28.0902	26.4692
-5	17.5773	22.5286	21.7141	24.6016	23.1146	21.7554	20.2489	22.9118	9.44031	7.87149	8.44386	11.7895	8.72692	6.05629	8.78322	7.98819	11.8389	9.95426	16.4689	14.6983	10.9621	13.3183	12.0011	11.942	19.0256	20.5163	20.766	18.3669	19.6439	17.9498	18.8527	20.9227	6.463	9.3081	6.69144	4.54202	4.78568	3.91468	12.3414	11.5802	12.2178	9.39815	12.4196	9.3801		-5	30.5673	28.328	26.7451
-4	17.7435	22.6462	21.9109	24.7528	23.3561	21.8738	20.4938	23.1099	9.50082	8.00479	8.46844	11.837	8.75199	6.06251	8.81612	8.05024	11.8492	9.93064	16.4786	14.7532	11.0271	13.3357	12.0009	11.9843	19.0776	20.5192	20.7589	18.3778	19.6389	17.8935	18.8909	20.9334	6.61652	9.45979	6.78984	4.6112	4.85912	4.01339	12.3538	11.618	12.2593	9.44325	12.4622	9.38727		-4	30.7761	28.5752	27.0277
-3	17.9208	22.7714	22.1151	24.9085	23.6062	22.0007	20.7511	23.319	9.56599	8.14592	8.49781	11.8836	8.77818	6.06896	8.84844	8.11379	11.8592	9.9092	16.4863	14.8067	11.0943	13.353	12.0033	12.0262	19.1316	20.5209	20.7502	18.3891	19.6352	17.8383	18.9331	20.9451	6.77994	9.62141	6.89067	4.6811	4.93415	4.11902	12.3651	11.6566	12.2982	9.48916	12.5037	9.39558		-3	30.9882	28.8316	27.3171
-2	18.1093	22.9049	22.3269	25.0689	23.8652	22.1367	21.0208	23.5393	9.63607	8.29512	8.53218	11.9295	8.80548	6.07558	8.88014	8.1789	11.8691	9.88988	16.4919	14.8587	11.1635	13.3703	12.0086	12.0676	19.1876	20.5213	20.7397	18.4011	19.6332	17.7844	18.9794	20.9578	6.95367	9.79333	6.99391	4.75163	5.01072	4.23179	12.3753	11.6959	12.3343	9.53588	12.544	9.40507		-2	31.2037	29.0975	27.6134
-1	18.3094	23.0468	22.5463	25.2343	24.133	22.2821	21.3032	23.7712	9.71131	8.45265	8.57179	11.9746	8.83391	6.08235	8.91119	8.24562	11.8787	9.87262	16.4955	14.9092	11.2349	13.3877	12.017	12.1084	19.2456	20.5204	20.7276	18.4137	19.633	17.732	19.0298	20.9716	7.13815	9.9759	7.09952	4.8227	5.08881	4.35197	12.3845	11.7358	12.3673	9.58339	12.583	9.4158		-1	31.4225	29.3728	27.9167
0	18.5213	23.1975	22.7736	25.405	24.4099	22.4373	21.5986	24.0147	9.79199	8.61873	8.61683	12.0189	8.86345	6.08921	8.94157	8.31399	11.888	9.85736	16.497	14.9582	11.3081	13.4056	12.0287	12.1485	19.3055	20.5182	20.7137	18.4269	19.6347	17.6813	19.0845	20.9866	7.33378	10.1695	7.20749	4.89421	5.16839	4.4798	12.3927	11.7762	12.3973	9.63169	12.6208	9.4278		0	31.6446	29.6577	28.2269
1	18.7453	23.3575	23.0087	25.5811	24.6959	22.6028	21.9071	24.2701	9.87834	8.7936	8.66754	12.0625	8.89409	6.09613	8.97125	8.38406	11.8969	9.84402	16.4965	15.0059	11.3831	13.4239	12.0439	12.1879	19.3673	20.5147	20.6983	18.4409	19.6386	17.6324	19.1436	21.0027	7.54097	10.3744	7.31779	4.96605	5.24942	4.61553	12.4	11.8171	12.424	9.68077	12.6572	9.44112		1	31.8699	29.952	28.5441
2	18.9817	23.527	23.252	25.7629	24.9911	22.7789	22.2288	24.5376	9.97062	8.97749	8.72411	12.1052	8.92581	6.10305	9.00021	8.45588	11.9055	9.83253	16.494	15.0521	11.4599	13.4429	12.0628	12.2265	19.431	20.5098	20.6812	18.4558	19.6447	17.5857	19.2071	21.02	7.76013	10.5911	7.43038	5.0381	5.33186	4.7594	12.4064	11.8584	12.4474	9.73062	12.6924	9.4558		2	32.0983	30.2559	28.8683
3	19.2306	23.7064	23.5033	25.9506	25.2956	22.966	22.5638	24.8173	10.0691	9.17062	8.78677	12.1471	8.95858	6.10994	9.02844	8.5295	11.9136	9.82281	16.4894	15.0968	11.5383	13.4627	12.0855	12.2643	19.4966	20.5035	20.6626	18.4715	19.6534	17.5413	19.2752	21.0386	7.99162	10.8197	7.54524	5.11027	5.41567	4.91165	12.4119	11.8999	12.4674	9.78121	12.7261	9.4719		3	32.3297	30.5693	29.1995
4	19.4923	23.8959	23.7628	26.1445	25.6094	23.1645	22.9124	25.1094	10.174	9.37321	8.85571	12.1882	8.99237	6.11675	9.05591	8.60496	11.9212	9.81476	16.4829	15.1402	11.6182	13.4836	12.1124	12.3012	19.564	20.4958	20.6425	18.4881	19.6648	17.4994	19.348	21.0586	8.23584	11.0607	7.66234	5.18241	5.50081	5.07253	12.4166	11.9418	12.4839	9.83254	12.7584	9.48945		4	32.5641	30.8921	29.5375
5	19.767	24.096	24.0306	26.3446	25.9326	23.3745	23.2744	25.414	10.2855	9.58546	8.93113	12.2285	9.02713	6.12342	9.08262	8.68228	11.9283	9.80831	16.4743	15.1822	11.6995	13.5056	12.1435	12.3372	19.6333	20.4868	20.621	18.5057	19.679	17.4604	19.4255	21.0799	8.49312	11.3142	7.78164	5.25442	5.58721	5.24227	12.4207	11.9837	12.4968	9.88457	12.7893	9.50851		5	32.8013	31.2243	29.8824
6	20.0548	24.3067	24.3067	26.5511	26.265	23.5965	23.6501	25.7311	10.404	9.80756	9.01323	12.268	9.06281	6.12991	9.10855	8.76151	11.9347	9.80336	16.4637	15.2227	11.7821	13.5291	12.179	12.3722	19.7043	20.4765	20.598	18.5243	19.6964	17.4244	19.5078	21.1025	8.76382	11.5806	7.90309	5.32616	5.67483	5.42108	12.4241	12.0258	12.5061	9.93728	12.8187	9.52912		6	33.0413	31.5656	30.234
7	20.3559	24.5285	24.5911	26.7642	26.6068	23.8307	24.0393	26.0608	10.5295	10.0397	9.10219	12.3066	9.09934	6.13616	9.13369	8.84267	11.9406	9.79981	16.4512	15.2619	11.8658	13.5541	12.2192	12.4064	19.7771	20.4648	20.5739	18.544	19.7171	17.3917	19.5951	21.1267	9.04824	11.8601	8.02666	5.3975	5.76361	5.60918	12.4269	12.0678	12.5117	9.99064	12.8466	9.55131		7	33.2838	31.9161	30.5922
8	20.6703	24.7616	24.8837	26.984	26.9578	24.0773	24.4421	26.4032	10.6624	10.282	9.19818	12.3443	9.13666	6.14213	9.15804	8.92579	11.9458	9.79758	16.4367	15.2997	11.9507	13.581	12.2641	12.4395	19.8517	20.4518	20.5485	18.5649	19.7413	17.3626	19.6874	21.1522	9.34668	12.1529	8.15231	5.4683	5.85348	5.80679	12.4293	12.1098	12.5136	10.0446	12.873	9.57512		8	33.5288	32.2755	30.9568
9	20.9982	25.0061	25.1847	27.2105	27.3179	24.3364	24.8584	26.7582	10.8028	10.5347	9.30137	12.381	9.17469	6.14775	9.18159	9.01088	11.9502	9.79656	16.4203	15.3361	12.0364	13.6098	12.314	12.4717	19.9279	20.4375	20.522	18.587	19.7692	17.3374	19.7848	21.1793	9.65942	12.4593	8.27997	5.53844	5.94438	6.01408	12.4313	12.1517	12.5118	10.0992	12.8978	9.6006		9	33.7762	32.6437	31.3277
10	21.3396	25.2622	25.4939	27.4438	27.687	24.6084	25.2881	27.1259	10.9508	10.7979	9.41192	12.4168	9.21335	6.15298	9.20433	9.09794	11.9539	9.79666	16.4019	15.3711	12.123	13.6407	12.369	12.5029	20.0058	20.422	20.4945	18.6103	19.801	17.3163	19.8873	21.2079	9.9867	12.7792	8.4096	5.60776	6.03624	6.23124	12.4329	12.1933	12.5063	10.1543	12.9211	9.62776		10	34.0258	33.0203	31.7047
11	21.6946	25.5301	25.8113	27.684	28.0649	24.8932	25.7312	27.5061	11.1068	11.0717	9.52996	12.4516	9.25255	6.15777	9.22624	9.18699	11.9567	9.79779	16.3817	15.4047	12.2103	13.6741	12.4292	12.5331	20.0854	20.4054	20.4662	18.635	19.837	17.2996	19.9952	21.2381	10.3287	13.113	8.54113	5.67613	6.12896	6.45843	12.4343	12.2347	12.4971	10.2099	12.9427	9.65665		11	34.2773	33.4052	32.0874
12	22.0631	25.81	26.1367	27.931	28.4516	25.1909	26.1873	27.8989	11.2707	11.3561	9.65563	12.4853	9.29218	6.16205	9.24734	9.27801	11.9587	9.79983	16.3597	15.4368	12.2982	13.7099	12.4948	12.5623	20.1666	20.3876	20.4371	18.661	19.8774	17.2876	20.1083	21.2698	10.6857	13.4607	8.6745	5.74341	6.22248	6.69581	12.4357	12.2758	12.4842	10.2659	12.9627	9.68727		12	34.5308	33.7981	32.4757
13	22.4451	26.1018	26.4701	28.1848	28.8466	25.5018	26.6564	28.3039	11.4428	11.6514	9.78904	12.518	9.33215	6.16577	9.2676	9.37099	11.9599	9.80271	16.3358	15.4675	12.3865	13.7485	12.5659	12.5906	20.2493	20.3687	20.4073	18.6884	19.9222	17.2806	20.2269	21.3031	11.0577	13.8223	8.80963	5.80944	6.31669	6.94348	12.437	12.3165	12.4677	10.3223	12.981	9.71965		13	34.7859	34.1986	32.8693
14	22.8405	26.4058	26.8114	28.4453	29.2499	25.8256	27.1382	28.7212	11.6232	11.9574	9.9303	12.5495	9.37234	6.16888	9.28701	9.4659	11.9601	9.80632	16.3101	15.4967	12.4752	13.7899	12.6425	12.618	20.3337	20.3489	20.377	18.7173	19.9719	17.2789	20.351	21.3381	11.445	14.1979	8.94644	5.87409	6.4115	7.20157	12.4383	12.3568	12.4477	10.3791	12.9976	9.75381		14	35.0425	34.6063	33.2678
15	23.2493	26.7219	27.1603	28.7126	29.6612	26.1625	27.6325	29.1504	11.8119	12.2743	10.0795	12.5797	9.41263	6.17132	9.30557	9.56272	11.9594	9.81057	16.2827	15.5244	12.5642	13.8345	12.7249	12.6445	20.4196	20.3281	20.3463	18.7476	20.0265	17.2828	20.4806	21.3747	11.8476	14.5875	9.08484	5.9372	6.5068	7.47015	12.4399	12.3966	12.4242	10.4362	13.0124	9.78973		15	35.3005	35.021	33.6708
16	23.6712	27.0501	27.5167	28.9863	30.08	26.5123	28.139	29.5914	12.0091	12.602	10.2367	12.6087	9.45291	6.17304	9.32325	9.66138	11.9577	9.81538	16.2535	15.5506	12.6533	13.8822	12.813	12.6702	20.507	20.3064	20.3154	18.7795	20.0862	17.2926	20.6159	21.413	12.2654	14.991	9.22473	5.99865	6.6025	7.74929	12.4418	12.4358	12.3973	10.4935	13.0255	9.82743		16	35.5596	35.4422	34.078
17	24.1062	27.3903	27.8804	29.2665	30.5062	26.875	28.6572	30.0439	12.2147	12.9405	10.4019	12.6363	9.49303	6.174	9.34006	9.76185	11.9549	9.82064	16.2226	15.5752	12.7424	13.9334	12.907	12.695	20.5959	20.284	20.2844	18.813	20.1513	17.3085	20.7568	21.4531	12.6987	15.4084	9.36602	6.05827	6.69846	8.03902	12.444	12.4745	12.3671	10.5509	13.0368	9.86689		17	35.8196	35.8694	34.489
18	24.5539	27.7426	28.2511	29.5529	30.9393	27.2504	29.187	30.5076	12.4288	13.2898	10.5752	12.6625	9.53288	6.17412	9.35595	9.86406	11.9512	9.82629	16.1901	15.5981	12.8315	13.9881	13.0069	12.7191	20.6863	20.2609	20.2534	18.8482	20.2218	17.3308	20.9035	21.4948	13.1472	15.8394	9.50857	6.11593	6.79458	8.33934	12.4468	12.5125	12.3338	10.6084	13.0462	9.90809		18	36.0804	36.3022	34.9034
19	25.0142	28.1067	28.6286	29.8453	31.379	27.6384	29.7278	30.982	12.6514	13.6498	10.7566	12.6872	9.57232	6.17337	9.37092	9.96792	11.9464	9.83223	16.1559	15.6194	12.9203	14.0464	13.1127	12.7425	20.7781	20.2372	20.2226	18.885	20.298	17.3598	21.0561	21.5384	13.6108	16.284	9.65228	6.17149	6.89072	8.65022	12.4503	12.5499	12.2973	10.666	13.0537	9.95101		19	36.3417	36.74	35.3206
20	25.4867	28.4826	29.0126	30.1435	31.8248	28.0386	30.2791	31.4669	12.8825	14.0202	10.946	12.7104	9.61121	6.1717	9.38493	10.0733	11.9406	9.83839	16.12	15.6389	13.0088	14.1086	13.2245	12.7653	20.8714	20.213	20.1922	18.9235	20.3801	17.3959	21.2144	21.5837	14.0896	16.742	9.797	6.2248	6.98674	8.97162	12.4545	12.5865	12.258	10.7234	13.0593	9.99562		20	36.6033	37.1824	35.7402
21	25.9711	28.87	29.4028	30.4472	32.2763	28.4509	30.8407	31.9618	13.122	14.4011	11.1435	12.7318	9.6494	6.16906	9.39796	10.1802	11.9336	9.8447	16.0826	15.6566	13.0969	14.1746	13.3423	12.7875	20.9661	20.1883	20.1624	18.9638	20.4681	17.4391	21.3787	21.6309	14.5833	17.2129	9.9426	6.27574	7.08251	9.30345	12.4595	12.6224	12.2159	10.7807	13.063	10.0419		21	36.865	37.6288	36.1617
22	26.4671	29.2687	29.7987	30.7561	32.7329	28.875	31.4118	32.4662	13.3698	14.7921	11.349	12.7515	9.68676	6.1654	9.40997	10.2885	11.9256	9.85108	16.0436	15.6725	13.1845	14.2447	13.4661	12.8092	21.0621	20.1634	20.1332	19.0058	20.5622	17.4899	21.5489	21.68	15.0916	17.6966	10.0889	6.32417	7.17789	9.64558	12.4656	12.6575	12.1711	10.8378	13.0646	10.0897		22	37.1266	38.0786	36.5846
23	26.9742	29.6784	30.2002	31.0699	33.1943	29.3105	31.9921	32.9796	13.6258	15.1931	11.5623	12.7694	9.72314	6.16068	9.42092	10.398	11.9165	9.85747	16.003	15.6864	13.2715	14.3189	13.5959	12.8305	21.1596	20.1382	20.1049	19.0497	20.6626	17.5484	21.7251	21.7309	15.6142	18.1927	10.2358	6.36996	7.27271	9.99786	12.4728	12.6918	12.1239	10.8946	13.0642	10.1391		23	37.3879	38.5312	37.0083
24	27.492	30.0988	30.6067	31.3882	33.6598	29.757	32.5809	33.5015	13.8898	15.6038	11.7835	12.7853	9.7584	6.15486	9.43078	10.5085	11.9063	9.86381	15.961	15.6984	13.3578	14.3973	13.7316	12.8515	21.2584	20.113	20.0775	19.0954	20.7693	17.615	21.9073	21.7838	16.151	18.7007	10.383	6.41298	7.36682	10.3601	12.4812	12.7253	12.0743	10.9509	13.0617	10.1899		24	37.6486	38.9859	37.4322
25	28.02	30.5295	31.0179	31.7106	34.129	30.2141	33.1776	34.0313	14.1618	16.0239	12.0123	12.7992	9.79239	6.14791	9.43948	10.62	11.8951	9.87004	15.9174	15.7082	13.4433	14.48	13.8732	12.8721	21.3586	20.0878	20.0514	19.1429	20.8824	17.6897	22.0955	21.8387	16.7014	19.2203	10.5304	6.45312	7.46006	10.732	12.491	12.758	12.0227	11.0067	13.0571	10.2421		25	37.9086	39.4422	37.8557
26	28.5577	30.9702	31.4332	32.0368	34.6012	30.6814	33.7816	34.5683	14.4414	16.4531	12.2487	12.8109	9.82498	6.13978	9.44698	10.7323	11.8827	9.8761	15.8724	15.7159	13.5279	14.5669	14.0207	12.8926	21.4602	20.0627	20.0266	19.1924	21.0019	17.7728	22.2898	21.8955	17.265	19.7508	10.6778	6.49026	7.55226	11.1135	12.5022	12.7898	11.9692	11.0619	13.0502	10.2956		26	38.1675	39.8992	38.2782
27	29.1045	31.4204	31.8524	32.3663	35.0759	31.1584	34.3922	35.112	14.7285	16.891	12.4924	12.8205	9.85602	6.13046	9.45322	10.8452	11.8693	9.88196	15.8259	15.7213	13.6115	14.6582	14.1738	12.9129	21.5631	20.0379	20.0033	19.2437	21.1281	17.8645	22.4901	21.9544	17.8414	20.2917	10.8249	6.52429	7.64325	11.504	12.515	12.8208	11.9139	11.1163	13.0411	10.3503		27	38.4253	40.3564	38.6992
28	29.6599	31.8797	32.2748	32.6987	35.5524	31.6446	35.0088	35.6616	15.0228	17.3372	12.7432	12.8277	9.88537	6.11991	9.45814	10.9585	11.8549	9.88757	15.7779	15.7244	13.694	14.7538	14.3326	12.9332	21.6673	20.0134	19.9817	19.297	21.2608	17.965	22.6965	22.0154	18.4301	20.8424	10.9717	6.5551	7.73285	11.9034	12.5295	12.851	11.8571	11.17	13.0298	10.406		28	38.6816	40.8129	39.1179
29	30.2232	32.3474	32.7	33.0335	36.0302	32.1394	35.6306	36.2164	15.3239	17.7912	13.001	12.8325	9.91291	6.10811	9.46167	11.072	11.8394	9.89289	15.7286	15.7251	13.7754	14.8537	14.4969	12.9536	21.7729	19.9893	19.9619	19.3522	21.4001	18.0744	22.9089	22.0784	19.0303	21.4024	11.1177	6.5826	7.82088	12.3111	12.5458	12.8803	11.7989	11.2227	13.0161	10.4627		29	38.9362	41.2682	39.5338
30	30.7938	32.8232	33.1275	33.3703	36.5086	32.6423	36.257	36.7756	15.6316	18.2527	13.2654	12.8348	9.9385	6.09504	9.46374	11.1855	11.8229	9.89788	15.6778	15.7233	13.8555	14.958	14.6666	12.974	21.8798	19.9659	19.9442	19.4093	21.546	18.1928	23.1274	22.1436	19.6416	21.9707	11.2628	6.6067	7.90716	12.7269	12.564	12.9088	11.7397	11.2743	13.0001	10.5203		30	39.189	41.7213	39.9462
31	31.371	33.3063	33.5568	33.7084	36.9869	33.1526	36.8872	37.3386	15.9456	18.721	13.5362	12.8345	9.96201	6.08068	9.46427	11.2989	11.8055	9.90252	15.6256	15.7188	13.9343	15.0665	14.8415	12.9947	21.9881	19.9431	19.9285	19.4683	21.6985	18.3203	23.3518	22.211	20.2631	22.5468	11.4067	6.62731	7.9915	13.1502	12.5842	12.9364	11.6795	11.3247	12.9816	10.5786		31	39.4396	42.1717	40.3544
32	31.9541	33.7963	33.9872	34.0475	37.4644	33.6697	37.5204	37.9044	16.2653	19.1957	13.813	12.8315	9.98333	6.06503	9.46318	11.4117	11.7872	9.90677	15.572	15.7116	14.0117	15.1793	15.0215	13.0156	22.0977	19.9212	19.9152	19.5293	21.8575	18.4571	23.5822	22.2806	20.8943	23.1299	11.5492	6.64436	8.07373	13.5804	12.6064	12.9633	11.6187	11.3739	12.9606	10.6375		32	39.6879	42.6185	40.7577
33	32.5423	34.2924	34.4182	34.3869	37.9406	34.193	38.1558	38.4722	16.5904	19.6761	14.0957	12.8257	10.0023	6.04808	9.46039	11.524	11.7679	9.91062	15.517	15.7017	14.0877	15.2963	15.2063	13.0369	22.2086	19.9002	19.9043	19.5922	22.023	18.6032	23.8185	22.3525	21.5342	23.719	11.6899	6.65777	8.15363	14.0172	12.6308	12.9894	11.5573	11.4216	12.9372	10.6967		33	39.9337	43.0609	41.1556
34	33.1349	34.7939	34.8493	34.7261	38.4147	34.7217	38.7928	39.0412	16.9205	20.1616	14.3837	12.8171	10.0189	6.02984	9.4558	11.6352	11.7478	9.91406	15.4606	15.6888	14.1621	15.4174	15.3958	13.0585	22.3209	19.8802	19.8961	19.657	22.1949	18.7586	24.0606	22.4266	22.182	24.3133	11.8287	6.66749	8.23104	14.4598	12.6575	13.0149	11.4957	11.4678	12.9112	10.7563		34	40.1767	43.4982	41.5474
35	33.731	35.3001	35.2798	35.0647	38.8861	35.2553	39.4304	39.6106	17.2551	20.6517	14.6768	12.8055	10.033	6.01029	9.44933	11.7454	11.7269	9.91705	15.4028	15.6729	14.235	15.5424	15.5896	13.0806	22.4345	19.8614	19.8905	19.7237	22.373	18.9233	24.3085	22.5031	22.8369	24.9119	11.9651	6.67345	8.30576	14.9076	12.6865	13.0396	11.434	11.5123	12.8826	10.816		35	40.4167	43.9296	41.9323
36	34.33	35.8104	35.7092	35.402	39.354	35.793	40.0678	40.1794	17.5937	21.1456	14.9745	12.7908	10.0445	5.98946	9.44088	11.854	11.7053	9.9196	15.3436	15.654	14.3062	15.6713	15.7877	13.1032	22.5495	19.8439	19.8878	19.7923	22.5573	19.0973	24.5621	22.5819	23.4979	25.5138	12.099	6.67562	8.3776	15.36	12.7178	13.0637	11.3724	11.555	12.8514	10.8756		36	40.6535	44.3544	42.3099
37	34.9308	36.3239	36.1369	35.7375	39.8178	36.334	40.7044	40.7467	17.9358	21.6427	15.2765	12.7731	10.0533	5.96735	9.43034	11.961	11.683	9.92169	15.283	15.6318	14.3756	15.804	15.9897	13.1263	22.6658	19.8277	19.8881	19.8628	22.7476	19.2806	24.8212	22.663	24.1641	26.1181	12.2301	6.67395	8.44637	15.8163	12.7516	13.0872	11.3113	11.5958	12.8176	10.935		37	40.8869	44.7718	42.6794
38	35.5328	36.8399	36.5622	36.0706	40.2768	36.8777	41.3392	41.3117	18.2808	22.1421	15.5823	12.7521	10.0593	5.94399	9.41763	12.066	11.66	9.92332	15.221	15.6064	14.4433	15.9402	16.1954	13.1501	22.7835	19.813	19.8915	19.935	22.9437	19.473	25.0858	22.7466	24.8345	26.7237	12.3579	6.66843	8.51189	16.2758	12.7879	13.1103	11.2506	11.6345	12.781	10.994		38	41.1167	45.1809	43.0402
39	36.1349	37.3575	36.9846	36.4008	40.7304	37.4232	41.9715	41.8734	18.6282	22.6433	15.8914	12.728	10.0625	5.9194	9.40263	12.1688	11.6365	9.92448	15.1576	15.5776	14.5091	16.0799	16.4044	13.1744	22.9025	19.7999	19.8981	20.009	23.1454	19.6746	25.3557	22.8325	25.508	27.3296	12.4823	6.65902	8.57398	16.7376	12.8267	13.1329	11.1907	11.671	12.7418	11.0524		39	41.3427	45.5812	43.3918
40	36.7364	37.876	37.4034	36.7274	41.1778	37.9699	42.6004	42.4309	18.9774	23.1453	16.2035	12.7005	10.0628	5.89361	9.38526	12.269	11.6125	9.92518	15.0927	15.5453	14.573	16.2227	16.6165	13.1995	23.0229	19.7884	19.9081	20.0848	23.3525	19.8851	25.6308	22.9209	26.1835	27.9347	12.6028	6.64572	8.63247	17.2011	12.868	13.1551	11.1318	11.7052	12.6997	11.1101		40	41.5647	45.9718	43.7335
41	37.3364	38.3945	37.8181	37.0501	41.6185	38.517	43.2252	42.9833	19.3278	23.6475	16.5179	12.6697	10.0602	5.86666	9.36539	12.3665	11.588	9.9254	15.0264	15.5095	14.635	16.3687	16.8314	13.2251	23.1447	19.7787	19.9214	20.1622	23.5648	20.1044	25.9109	23.0117	26.8599	28.5379	12.7193	6.62853	8.68717	17.6653	12.9119	13.177	11.0741	11.737	12.655	11.1669		41	41.7824	46.352	44.0648
42	37.9339	38.9121	38.228	37.3682	42.0518	39.0637	43.845	43.5297	19.6788	24.149	16.8343	12.6355	10.0546	5.83858	9.34294	12.4609	11.5632	9.92516	14.9587	15.47	14.6949	16.5174	17.0487	13.2515	23.2678	19.7709	19.9381	20.2413	23.782	20.3323	26.1958	23.1049	27.5362	29.1382	12.8314	6.60745	8.73793	18.1295	12.9584	13.1988	11.0176	11.7661	12.6074	11.2226		42	41.9957	46.7211	44.3851
43	38.5281	39.4281	38.6324	37.6811	42.477	39.6093	44.4592	44.0691	20.0298	24.6491	17.1521	12.598	10.046	5.80943	9.3178	12.5519	11.5381	9.92444	14.8895	15.4269	14.7528	16.6688	17.2681	13.2786	23.3923	19.7649	19.9585	20.3219	24.0038	20.5686	26.4853	23.2006	28.2111	29.7342	12.9387	6.5825	8.78459	18.5927	13.0075	13.2205	10.9627	11.7926	12.5571	11.277		43	42.2043	47.0785	44.694
44	39.1181	39.9415	39.031	37.9885	42.8936	40.153	45.0669	44.6007	20.3801	25.1469	17.4708	12.5569	10.0344	5.77924	9.28986	12.6393	11.5128	9.92327	14.8188	15.38	14.8086	16.8226	17.4893	13.3063	23.5182	19.761	19.9824	20.404	24.2298	20.8131	26.7793	23.2987	28.8834	30.325	13.041	6.5537	8.82698	19.054	13.0592	13.2421	10.9095	11.8163	12.5039	11.33		44	42.4081	47.4235	44.9909
45	39.7029	40.4515	39.4229	38.2897	43.3009	40.6942	45.6674	45.1236	20.7291	25.6416	17.79	12.5125	10.0198	5.74808	9.25904	12.7228	11.4874	9.92162	14.7466	15.3292	14.8622	16.9784	17.7118	13.3347	23.6454	19.7592	20.01	20.4875	24.4599	21.0654	27.0775	23.3992	29.552	30.9094	13.138	6.52109	8.86497	19.5127	13.1134	13.2639	10.8581	11.837	12.448	11.3814		45	42.607	47.7554	45.2754
46	40.2817	40.9573	39.8077	38.5842	43.6984	41.232	46.26	45.6369	21.0761	26.1323	18.109	12.4646	10.0022	5.716	9.22524	12.8022	11.4619	9.91952	14.6728	15.2745	14.9137	17.1362	17.9354	13.3638	23.7739	19.7596	20.0413	20.5724	24.6937	21.3254	27.3797	23.5021	30.2157	31.4862	13.2295	6.48471	8.89843	19.9676	13.1701	13.2859	10.8087	11.8547	12.3892	11.431		46	42.8006	48.0737	45.547
47	40.8536	41.4579	40.1848	38.8716	44.0855	41.7658	46.844	46.1398	21.4206	26.6184	18.4273	12.4132	9.98158	5.68307	9.18836	12.8771	11.4364	9.91696	14.5975	15.2159	14.9629	17.2955	18.1597	13.3934	23.9038	19.7622	20.0763	20.6585	24.9307	21.5926	27.6855	23.6073	30.8732	32.0543	13.315	6.44461	8.92721	20.418	13.2293	13.3083	10.7615	11.8692	12.3277	11.4787		47	42.9888	48.3777	45.8055
48	41.4177	41.9525	40.5537	39.1515	44.4617	42.2948	47.4187	46.6314	21.7618	27.0989	18.7445	12.3585	9.95802	5.64936	9.14833	12.9474	11.4111	9.91394	14.5207	15.1533	15.0098	17.4562	18.3842	13.4236	24.0349	19.767	20.1151	20.7457	25.1707	21.8667	27.9948	23.7148	31.5233	32.6125	13.3944	6.40086	8.95122	20.8628	13.2909	13.3312	10.7165	11.8804	12.2633	11.5243		48	43.1715	48.667	46.0503
49	41.9731	42.4403	40.9138	39.4234	44.8265	42.8185	47.9835	47.1109	22.0991	27.573	19.0599	12.3003	9.93155	5.61493	9.10505	13.0128	11.3859	9.91045	14.4423	15.0866	15.0545	17.618	18.6086	13.4543	24.1673	19.7742	20.1576	20.8341	25.4132	22.1474	28.3073	23.8246	32.1648	33.1597	13.4674	6.35352	8.97034	21.3012	13.3548	13.3546	10.674	11.8883	12.1962	11.5677		49	43.3484	48.941	46.2811
50	42.519	42.9204	41.2645	39.6868	45.1795	43.336	48.5377	47.5776	22.4319	28.04	19.3732	12.2389	9.9022	5.57987	9.05846	13.073	11.3611	9.90651	14.3623	15.0158	15.0967	17.7805	18.8325	13.4855	24.301	19.7838	20.2038	20.9233	25.6578	22.4343	28.6226	23.9366	32.7965	33.6948	13.5337	6.30266	8.98448	21.7321	13.4211	13.3788	10.6341	11.8927	12.1264	11.6087		50	43.5194	49.1993	46.4978
51	43.0546	43.392	41.6055	39.9414	45.5201	43.8468	49.0808	48.0308	22.7595	28.499	19.6836	12.1741	9.87005	5.54426	9.00849	13.1279	11.3366	9.90211	14.2807	14.9409	15.1366	17.9435	19.0555	13.5171	24.4359	19.7958	20.2537	21.0135	25.9042	22.7269	28.9404	24.0508	33.4172	34.2167	13.5931	6.24838	8.99356	22.1546	13.4896	13.4039	10.5968	11.8936	12.0538	11.6473		51	43.6843	49.4413	46.6999
52	43.5789	43.8544	41.9361	40.1867	45.8479	44.3502	49.6122	48.4697	23.0814	28.9494	19.9908	12.1061	9.83516	5.50817	8.95507	13.1773	11.3125	9.89723	14.1975	14.8619	15.1741	18.1066	19.2772	13.5489	24.5719	19.8102	20.3074	21.1043	26.1519	23.0248	29.2604	24.167	34.0256	34.7243	13.6455	6.19076	8.9975	22.5679	13.5601	13.43	10.5623	11.8908	11.9786	11.6832		52	43.8429	49.6668	46.8874
53	44.0913	44.3066	42.256	40.4226	46.1626	44.8457	50.1314	48.8936	23.3968	29.3903	20.2943	12.035	9.79763	5.47169	8.89815	13.2209	11.289	9.89188	14.1126	14.7788	15.2091	18.2696	19.4972	13.581	24.7091	19.8271	20.3646	21.1958	26.4005	23.3276	29.5822	24.2851	34.6206	35.2165	13.6905	6.12991	8.99626	22.9709	13.6327	13.4574	10.5307	11.8844	11.9007	11.7164		53	43.9951	49.8753	47.06
54	44.5909	44.7479	42.5647	40.6485	46.4638	45.3326	50.6379	49.302	23.7052	29.8212	20.5935	11.9608	9.75753	5.43491	8.83768	13.2586	11.2661	9.88604	14.0261	14.6915	15.2417	18.4321	19.7152	13.6133	24.8473	19.8465	20.4255	21.2878	26.6496	23.6348	29.9056	24.4051	35.201	35.6923	13.728	6.06594	8.98978	23.3628	13.7072	13.486	10.502	11.8742	11.8202	11.7467		54	44.1407	50.0666	47.2175
55	45.077	45.1777	42.8618	40.8643	46.7511	45.8105	51.1312	49.6942	24.0061	30.2412	20.888	11.8836	9.71497	5.39792	8.77363	13.2903	11.2439	9.87971	13.9379	14.6	15.2717	18.5939	19.9306	13.6455	24.9865	19.8684	20.4898	21.3802	26.8986	23.9459	30.23	24.5269	35.7657	36.1508	13.7579	5.99895	8.97805	23.7427	13.7835	13.5161	10.4764	11.8602	11.7371	11.7742		55	44.2795	50.2404	47.36
56	45.5489	45.5951	43.1469	41.0697	47.0243	46.2788	51.611	50.0698	24.2988	30.6497	21.1774	11.8037	9.67007	5.36082	8.70598	13.3157	11.2224	9.87287	13.8481	14.5044	15.2992	18.7547	20.1433	13.6777	25.1267	19.8928	20.5576	21.4728	27.1472	24.2604	30.5552	24.6503	36.3136	36.5909	13.78	5.92907	8.96104	24.1097	13.8615	13.5479	10.4539	11.8424	11.6516	11.7987		56	44.4115	50.3964	47.4873
57	46.0058	45.9996	43.4197	41.2644	47.2831	46.737	52.0769	50.4282	24.5829	31.0462	21.4611	11.721	9.62293	5.3237	8.6347	13.3348	11.2018	9.8655	13.7566	14.4047	15.3242	18.914	20.3526	13.7098	25.2677	19.9197	20.6287	21.5656	27.395	24.5779	30.8807	24.7753	36.8436	37.0118	13.7942	5.85643	8.93875	24.463	13.941	13.5815	10.4345	11.8207	11.5636	11.8202		57	44.5363	50.5344	47.5993
58	46.4472	46.3903	43.6797	41.4481	47.5272	47.1846	52.5285	50.769	24.8579	31.43	21.7388	11.6357	9.5737	5.28665	8.55978	13.3475	11.1821	9.85758	13.6634	14.301	15.3466	19.0717	20.5583	13.7415	25.4095	19.9491	20.7031	21.6583	27.6414	24.8978	31.2062	24.9016	37.3546	37.4127	13.8004	5.78115	8.9112	24.8018	14.0219	13.6171	10.4184	11.7952	11.4732	11.8386		58	44.654	50.6544	47.6962
59	46.8724	46.7668	43.9267	41.6208	47.7564	47.6214	52.9655	51.0917	25.1233	31.8006	22.01	11.5481	9.5225	5.24977	8.48124	13.3536	11.1634	9.8491	13.5686	14.1932	15.3665	19.2274	20.7601	13.7728	25.5519	19.9809	20.7806	21.7509	27.8861	25.2195	31.5311	25.0291	37.8457	37.7926	13.7985	5.70338	8.87841	25.1252	14.1041	13.6548	10.4056	11.7657	11.3805	11.8538		59	44.7642	50.7562	47.778
60	47.2808	47.1283	44.1604	41.7823	47.9706	48.0467	53.3877	51.396	25.3786	32.1575	22.2745	11.4582	9.46947	5.21315	8.39908	13.3532	11.1457	9.84003	13.4721	14.0814	15.3838	19.3808	20.9574	13.8037	25.6949	20.0152	20.8611	21.8431	28.1286	25.5427	31.8551	25.1577	38.3159	38.1508	13.7884	5.62326	8.84043	25.4326	14.1875	13.6948	10.3961	11.7324	11.2856	11.866		60	44.867	50.8397	47.8447
61	47.6719	47.4744	44.3806	41.9324	48.1696	48.4604	53.7948	51.6817	25.6234	32.5004	22.5318	11.3663	9.41477	5.17691	8.31334	13.3462	11.1292	9.83035	13.374	13.9658	15.3985	19.5317	21.15	13.8338	25.8384	20.0519	20.9444	21.935	28.3684	25.8666	32.1778	25.2872	38.7642	38.4867	13.7702	5.54094	8.79731	25.7232	14.2718	13.7373	10.39	11.6951	11.1886	11.875		61	44.9621	50.905	47.8964
62	48.0451	47.8044	44.5869	42.071	48.3533	48.8621	54.1867	51.9485	25.8574	32.8286	22.7817	11.2724	9.35854	5.14112	8.22404	13.3325	11.1138	9.82002	13.2743	13.8462	15.4106	19.6797	21.3376	13.8632	25.9822	20.091	21.0304	22.0263	28.6052	26.1909	32.4987	25.4174	39.1899	38.7995	13.7438	5.45657	8.74911	25.9963	14.3569	13.7823	10.3872	11.6541	11.0894	11.881		62	45.0495	50.9521	47.9334
63	48.4	48.118	44.7793	42.198	48.5216	49.2514	54.5633	52.1961	26.0802	33.142	23.0238	11.1769	9.30096	5.10588	8.13125	13.3122	11.0997	9.80901	13.1729	13.7229	15.4201	19.8246	21.5197	13.8917	26.1262	20.1324	21.119	22.1169	28.8385	26.515	32.8174	25.5481	39.5921	39.0887	13.7093	5.3703	8.69593	26.2514	14.4428	13.8302	10.3879	11.6092	10.9883	11.8838		63	45.129	50.981	47.9558
64	48.7361	48.4147	44.9575	42.3135	48.6744	49.6282	54.9244	52.4245	26.2915	33.4403	23.2579	11.0799	9.24218	5.0713	8.03501	13.2852	11.0868	9.7973	13.07	13.5959	15.427	19.966	21.6961	13.9191	26.2703	20.1761	21.21	22.2066	29.0679	26.8384	33.1334	25.6791	39.9701	39.3537	13.6667	5.28228	8.63786	26.4879	14.5292	13.881	10.392	11.5606	10.8852	11.8836		64	45.2005	50.992	47.9639
65	49.053	48.6939	45.1213	42.4174	48.8118	49.9922	55.27	52.6335	26.4912	33.723	23.4838	10.9817	9.18237	5.03746	7.93541	13.2518	11.0753	9.78485	12.9656	13.4653	15.4314	20.1038	21.8664	13.9454	26.4144	20.2221	21.3032	22.2954	29.2931	27.1605	33.4462	25.8102	40.3231	39.5941	13.616	5.19269	8.57501	26.7053	14.616	13.935	10.3995	11.5084	10.7804	11.8804		65	45.2638	50.9851	47.9578
66	49.3505	48.9555	45.2707	42.5096	48.9337	50.3432	55.6001	52.8232	26.6789	33.9902	23.7012	10.8824	9.1217	5.00446	7.83253	13.2118	11.0651	9.77162	12.8596	13.3312	15.4332	20.2377	22.0304	13.9703	26.5582	20.2701	21.3984	22.3831	29.5136	27.4809	33.7555	25.9412	40.6506	39.8095	13.5575	5.10168	8.50749	26.903	14.7031	13.9922	10.4105	11.4525	10.6738	11.8743		66	45.3189	50.9605	47.9379
67	49.6281	49.199	45.4055	42.5903	49.0402	50.681	55.9146	52.9934	26.8544	34.2415	23.9099	10.7824	9.06036	4.97238	7.72646	13.1654	11.0564	9.75757	12.7521	13.1937	15.4325	20.3673	22.1877	13.9939	26.7016	20.3203	21.4955	22.4695	29.7291	27.7991	34.0608	26.0719	40.9519	39.9994	13.4911	5.00941	8.43545	27.0807	14.7903	14.0528	10.4249	11.3931	10.5656	11.8654		67	45.3656	50.9186	47.9045
68	49.8857	49.4241	45.5257	42.6595	49.1313	51.0056	56.2136	53.1443	27.0177	34.477	24.1099	10.6818	8.99851	4.94131	7.6173	13.1127	11.0491	9.74267	12.6433	13.0529	15.4293	20.4926	22.3381	14.0159	26.8444	20.3725	21.5942	22.5545	29.9393	28.1145	34.3615	26.2021	41.2266	40.1638	13.417	4.91605	8.35903	27.238	14.8774	14.1169	10.4428	11.3303	10.4558	11.8537		68	45.4039	50.8596	47.8578
69	50.123	49.6306	45.6313	42.7172	49.2071	51.3168	56.4972	53.2759	27.1687	34.6966	24.3011	10.5809	8.93633	4.91134	7.50519	13.0539	11.0432	9.72687	12.533	12.909	15.4236	20.6132	22.4814	14.0362	26.9866	20.4266	21.6943	22.6381	30.1437	28.4267	34.6574	26.3314	41.4741	40.3022	13.3355	4.82176	8.27837	27.3745	14.9645	14.1848	10.4641	11.2643	10.3447	11.8394		69	45.4337	50.7839	47.7984
70	50.3398	49.8183	45.7221	42.7636	49.2677	51.6146	56.7655	53.3885	27.3073	34.9003	24.4832	10.48	8.874	4.88254	7.39025	12.9892	11.0388	9.71013	12.4215	12.7621	15.4154	20.729	22.6173	14.0548	27.1277	20.4825	21.7956	22.72	30.3422	28.7353	34.9479	26.4598	41.6941	40.4147	13.2467	4.72671	8.19366	27.4901	15.0513	14.2565	10.489	11.195	10.2322	11.8226		70	45.4549	50.6917	47.7264
71	50.536	49.987	45.7983	42.7987	49.3133	51.8988	57.0186	53.4822	27.4336	35.0882	24.6564	10.3794	8.8117	4.85498	7.27261	12.9186	11.0359	9.6924	12.3087	12.6124	15.4049	20.8398	22.7456	14.0714	27.2678	20.5402	21.898	22.8002	30.5343	29.0398	35.2326	26.5868	41.8863	40.5011	13.1508	4.63106	8.10505	27.5846	15.1378	14.3321	10.5173	11.1228	10.1185	11.8035		71	45.4674	50.5836	47.6423
72	50.7116	50.1365	45.8599	42.8228	49.3439	52.1696	57.2568	53.5573	27.5475	35.2604	24.8206	10.2792	8.74961	4.82875	7.15243	12.8424	11.0346	9.67366	12.1947	12.4599	15.3919	20.9453	22.8661	14.086	27.4065	20.5996	22.0012	22.8785	30.7199	29.3397	35.511	26.7124	42.0505	40.5614	13.048	4.53496	8.01274	27.6577	15.2237	14.4119	10.5491	11.0477	10.0037	11.7821		72	45.4712	50.4598	47.5465
73	50.8664	50.2668	45.9068	42.836	49.3598	52.4269	57.4801	53.614	27.6491	35.4171	24.9757	10.1799	8.6879	4.8039	7.02987	12.7608	11.0347	9.65385	12.0796	12.3049	15.3767	21.0455	22.9786	14.0985	27.5437	20.6605	22.1049	22.9548	30.8987	29.6348	35.7828	26.8361	42.1864	40.5956	12.9386	4.43858	7.91692	27.7095	15.3092	14.4959	10.5843	10.9698	9.88792	11.7587		73	45.4662	50.321	47.4395
74	51.0005	50.3778	45.9393	42.8385	49.3611	52.6708	57.6888	53.6526	27.7387	35.5585	25.1219	10.0816	8.62674	4.7805	6.9051	12.6741	11.0364	9.63292	11.9635	12.1474	15.3592	21.1401	23.0829	14.1087	27.6792	20.7229	22.2089	23.0291	31.0705	29.9245	36.0474	26.9578	42.2939	40.604	12.8229	4.34208	7.81777	27.7399	15.394	14.5843	10.6231	10.8895	9.77122	11.7334		74	45.4523	50.1676	47.3215
75	51.1139	50.4695	45.9573	42.8304	49.3481	52.9012	57.8832	53.6736	27.8164	35.6848	25.2592	9.98459	8.5663	4.75861	6.77829	12.5825	11.0395	9.61085	11.8464	11.9877	15.3394	21.229	23.1789	14.1167	27.8127	20.7867	22.3131	23.1012	31.235	30.2086	36.3046	27.0773	42.373	40.5867	12.7011	4.2456	7.7155	27.7489	15.4781	14.6771	10.6653	10.8067	9.65373	11.7064		75	45.4296	50.0001	47.1932
76	51.2067	50.542	45.961	42.8121	49.321	53.1184	58.0635	53.6774	27.8823	35.7964	25.3878	9.88925	8.50675	4.73827	6.64964	12.4863	11.0441	9.58757	11.7285	11.826	15.3176	21.3122	23.2665	14.1223	27.944	20.8516	22.4171	23.171	31.3921	30.4868	36.5539	27.1942	42.4238	40.5439	12.5736	4.14931	7.61032	27.7367	15.5614	14.7744	10.7111	10.7218	9.53555	11.6779		76	45.398	49.819	47.0548
77	51.279	50.5952	45.9506	42.7836	49.28	53.3225	58.23	53.6643	27.9368	35.8937	25.5077	9.79581	8.44825	4.71953	6.51933	12.3858	11.0502	9.56307	11.6098	11.6624	15.2936	21.3894	23.3455	14.1253	28.0729	20.9177	22.5208	23.2384	31.5417	30.7586	36.7949	27.3084	42.4461	40.476	12.4407	4.05334	7.50244	27.7033	15.644	14.8764	10.7603	10.6349	9.4168	11.648		77	45.3574	49.6251	46.9069
78	51.3311	50.6293	45.9263	42.7453	49.2254	53.5134	58.3831	53.6348	27.9801	35.9771	25.6191	9.70456	8.39096	4.70244	6.38756	12.2813	11.0577	9.53729	11.4905	11.497	15.2676	21.4607	23.416	14.1259	28.1991	20.9848	22.624	23.3034	31.6835	31.0238	37.0273	27.4195	42.4404	40.3833	12.3027	3.95784	7.39208	27.649	15.7257	14.9831	10.8131	10.5463	9.29758	11.6169		78	45.3079	49.4188	46.7499
79	51.3631	50.6444	45.8881	42.6974	49.1575	53.6915	58.5229	53.5894	28.0127	36.047	25.7222	9.61577	8.33502	4.68701	6.25455	12.1731	11.0666	9.51019	11.3705	11.3302	15.2397	21.5258	23.4777	14.1238	28.3225	21.0529	22.7263	23.3659	31.8176	31.2822	37.2507	27.5273	42.4066	40.2662	12.16	3.86294	7.27944	27.5741	15.8066	15.0947	10.8695	10.456	9.178	11.5849		79	45.2495	49.2007	46.5842
80	51.3752	50.6407	45.8363	42.6402	49.0765	53.8568	58.6498	53.5287	28.0348	36.1038	25.8172	9.52971	8.28058	4.67329	6.1205	12.0616	11.0769	9.48174	11.2501	11.162	15.2098	21.5849	23.5307	14.119	28.4427	21.1217	22.8275	23.4259	31.9438	31.5336	37.4647	27.6316	42.3451	40.1253	12.0128	3.76878	7.16475	27.4789	15.8866	15.2112	10.9295	10.3644	9.05817	11.5521		80	45.1822	48.9716	46.4103
81	51.3678	50.6184	45.7712	42.5738	48.9828	54.0095	58.7643	53.4532	28.0469	36.1482	25.9043	9.44667	8.22778	4.66129	5.98563	11.9471	11.0884	9.45191	11.1294	10.9926	15.1782	21.6377	23.575	14.1115	28.5596	21.1911	22.9275	23.4831	32.062	31.7776	37.6691	27.7321	42.2563	39.961	11.8617	3.67548	7.04822	27.3637	15.9659	15.3326	10.9931	10.2716	8.93818	11.5188		81	45.106	48.7321	46.2287
82	51.3411	50.5777	45.6929	42.4987	48.8765	54.1498	58.8665	53.3634	28.0494	36.1807	25.9838	9.36692	8.17674	4.65102	5.85016	11.8299	11.1013	9.42065	11.0084	10.8223	15.1449	21.6844	23.6105	14.1013	28.6729	21.2611	23.026	23.5377	32.1723	32.0142	37.8635	27.8286	42.1405	39.774	11.7069	3.58317	6.93007	27.2289	16.0444	15.459	11.0604	10.1779	8.81815	11.4852		82	45.021	48.4828	46.0397
83	51.2956	50.5189	45.6017	42.4151	48.7581	54.278	58.957	53.26	28.0429	36.2019	26.0559	9.29071	8.1276	4.64249	5.71432	11.7105	11.1153	9.38795	10.8873	10.6512	15.1099	21.7248	23.6372	14.0883	28.7823	21.3315	23.1228	23.5895	32.2746	32.2432	38.0477	27.921	41.9982	39.5649	11.5489	3.49196	6.81052	27.075	16.1222	15.5905	11.1314	10.0835	8.69817	11.4514		83	44.9272	48.2244	45.8437
84	51.2315	50.4423	45.4978	42.3233	48.6279	54.3942	59.0359	53.1435	28.0278	36.2123	26.1209	9.2183	8.08046	4.63569	5.57833	11.5892	11.1305	9.35377	10.7662	10.4795	15.0734	21.759	23.6552	14.0725	28.8877	21.4023	23.2176	23.6385	32.369	32.4644	38.2213	28.0088	41.8298	39.3343	11.388	3.40195	6.68977	26.9025	16.1994	15.7271	11.2062	9.98852	8.57835	11.4177		84	44.8247	47.9577	45.6413
85	51.1494	50.3481	45.3817	42.2235	48.4862	54.4987	59.1038	53.0146	28.0046	36.2126	26.1791	9.14995	8.03544	4.63062	5.44243	11.4665	11.1467	9.31808	10.6452	10.3075	15.0355	21.787	23.6645	14.0538	28.9888	21.4732	23.3103	23.6847	32.4554	32.6777	38.3841	28.092	41.636	39.083	11.2245	3.31325	6.56803	26.7119	16.2761	15.8689	11.2848	9.89331	8.45879	11.3842		85	44.7136	47.6833	45.4327
86	51.0497	50.2369	45.2534	42.116	48.3333	54.5916	59.1609	52.8738	27.974	36.2035	26.2308	9.08589	7.99262	4.62726	5.30684	11.3426	11.164	9.28087	10.5244	10.1353	14.9961	21.8088	23.6652	14.0323	29.0854	21.5441	23.4007	23.7281	32.534	32.8832	38.5359	28.1704	41.4173	38.8118	11.059	3.22596	6.44552	26.5038	16.3523	16.0158	11.3673	9.79804	8.33958	11.3513		86	44.5939	47.4019	45.2185
87	50.9329	50.1088	45.1134	42.0012	48.1695	54.6732	59.2076	52.7219	27.9365	36.1857	26.2764	9.02636	7.9521	4.62559	5.17178	11.218	11.1821	9.24211	10.404	9.96306	14.9555	21.8245	23.6574	14.008	29.1772	21.615	23.4885	23.7685	32.6047	33.0806	38.6765	28.2437	41.1744	38.5213	10.8917	3.14016	6.32243	26.2788	16.4282	16.168	11.4537	9.70293	8.22083	11.3189		87	44.4657	47.1143	44.9989
88	50.7995	49.9645	44.9619	41.8793	47.9952	54.7438	59.2443	52.5594	27.8926	36.1598	26.3161	8.97158	7.91396	4.62557	5.0375	11.0931	11.2011	9.20179	10.2841	9.79105	14.9136	21.8341	23.6411	13.9809	29.2641	21.6857	23.5735	23.8061	32.6678	33.27	38.8056	28.3118	40.9079	38.2125	10.723	3.05592	6.19895	26.0376	16.5039	16.3253	11.5443	9.60818	8.10262	11.2874		88	44.3293	46.8212	44.7745
89	50.6499	49.8041	44.7992	41.7506	47.8108	54.8036	59.2714	52.387	27.8431	36.1265	26.3503	8.92177	7.87827	4.62718	4.90422	10.9682	11.2209	9.15989	10.1647	9.61943	14.8706	21.8377	23.6165	13.951	29.3458	21.7561	23.6555	23.8408	32.7233	33.4515	38.9232	28.3744	40.6187	37.8861	10.5534	2.97334	6.07528	25.7808	16.5797	16.4878	11.6389	9.51402	7.98506	11.257		89	44.1846	46.5232	44.5454
90	50.4848	49.6283	44.6258	41.6154	47.6165	54.8529	59.2891	52.2054	27.7886	36.0866	26.3793	8.87714	7.84509	4.63036	4.77217	10.8439	11.2413	9.11639	10.0461	9.44839	14.8266	21.8355	23.5838	13.9183	29.4221	21.8262	23.7345	23.8725	32.7714	33.6249	39.029	28.4316	40.3074	37.543	10.3832	2.89246	5.9516	25.5092	16.6556	16.6556	11.7378	9.42064	7.86823	11.2277		90	44.0319	46.2212	44.312
91	50.3048	49.4375	44.4419	41.4739	47.4127	54.8918	59.2979	52.0152	27.7297	36.0408	26.4034	8.83786	7.81447	4.63505	4.64157	10.7205	11.2623	9.0713	9.92829	9.27812	14.7815	21.8274	23.543	13.8828	29.4928	21.8956	23.8101	23.9013	32.8122	33.7904	39.123	28.483	39.975	37.1842	10.2127	2.81336	5.82808	25.2234	16.7319	16.8285	11.841	9.32823	7.75223	11.1998		91	43.8712	45.9158	44.0748
92	50.1104	49.2322	44.2478	41.3265	47.1998	54.9207	59.298	51.8171	27.6671	35.9898	26.4231	8.80412	7.78645	4.64121	4.51263	10.5983	11.2837	9.02461	9.81145	9.1088	14.7356	21.8136	23.4944	13.8447	29.5578	21.9645	23.8822	23.9273	32.8459	33.9479	39.205	28.5285	39.6222	36.8105	10.0423	2.73607	5.7049	24.9243	16.8088	17.0066	11.9486	9.23701	7.63714	11.1734		92	43.7029	45.6077	43.8339
93	49.9023	49.0128	44.044	41.1734	46.978	54.9397	59.2899	51.6116	27.6014	35.9342	26.4387	8.77608	7.76106	4.64877	4.38559	10.4779	11.3055	8.97632	9.69569	8.94061	14.6889	21.7943	23.438	13.8038	29.6169	22.0325	23.9507	23.9503	32.8726	34.0977	39.275	28.5682	39.25	36.4229	9.87243	2.66066	5.5822	24.6125	16.8864	17.1898	12.0607	9.14714	7.52305	11.1486		93	43.5269	45.2976	43.5898
94	49.681	48.78	43.8307	41.0149	46.7478	54.9492	59.2738	51.3995	27.5333	35.8749	26.4505	8.75391	7.73834	4.65765	4.26064	10.3594	11.3276	8.92642	9.58111	8.77373	14.6415	21.7695	23.3742	13.7604	29.6698	22.0997	24.0154	23.9705	32.8926	34.2398	39.3329	28.6017	38.8592	36.0222	9.70333	2.58714	5.46016	24.2889	16.9651	17.3781	12.1774	9.0588	7.41005	11.1257		94	43.3436	44.9862	43.3426
95	49.4473	48.5341	43.6084	40.8512	46.5095	54.9494	59.25	51.1813	27.4635	35.8124	26.4588	8.73773	7.71828	4.66777	4.138	10.2435	11.3498	8.87493	9.46782	8.60834	14.5933	21.7395	23.3031	13.7144	29.7165	22.166	24.0761	23.9878	32.9061	34.3742	39.3786	28.6291	38.4508	35.6094	9.53536	2.51557	5.3389	23.9542	17.0451	17.5715	12.2988	8.97216	7.29821	11.1046		95	43.1532	44.6742	43.0927
96	49.2018	48.2759	43.3774	40.6826	46.2634	54.9405	59.2189	50.9578	27.3927	35.7476	26.464	8.72767	7.7009	4.67906	4.01787	10.1304	11.372	8.82184	9.35595	8.44459	14.5446	21.7043	23.2249	13.6659	29.7568	22.2311	24.1328	24.0022	32.9132	34.5013	39.4122	28.6503	38.0257	35.1855	9.36883	2.44595	5.21856	23.6093	17.1266	17.7699	12.4251	8.88738	7.18763	11.0856		96	42.9558	44.3623	42.8402
97	48.9451	48.0058	43.1381	40.5093	46.0099	54.9228	59.1807	50.7294	27.3214	35.6811	26.4664	8.72385	7.68619	4.69141	3.90045	10.0205	11.3942	8.76718	9.24558	8.28266	14.4953	21.6642	23.1399	13.615	29.7906	22.2951	24.1852	24.0139	32.9143	34.621	39.4336	28.6652	37.5849	34.7514	9.20405	2.37831	5.09927	23.2549	17.2099	17.9733	12.5563	8.8046	7.07838	11.0687		97	42.7517	44.0511	42.5855
98	48.678	47.7245	42.8908	40.3315	45.7492	54.8966	59.1358	50.4968	27.2505	35.6136	26.4664	8.72636	7.67415	4.70474	3.78591	9.91409	11.4162	8.71095	9.13682	8.12269	14.4454	21.6193	23.0483	13.5616	29.8178	22.3578	24.2333	24.0227	32.9095	34.7337	39.443	28.6738	37.1294	34.308	9.04131	2.31266	4.98115	22.8919	17.2953	18.1815	12.6926	8.72396	6.97053	11.054		98	42.5411	43.7412	42.3288
99	48.401	47.4324	42.6359	40.1494	45.4817	54.8619	59.0844	50.2606	27.1804	35.5457	26.4642	8.73528	7.66474	4.71895	3.67444	9.81164	11.4379	8.65318	9.02976	7.96485	14.3951	21.5698	22.9504	13.506	29.8382	22.4191	24.277	24.0288	32.8991	34.8393	39.4403	28.676	36.6602	33.8563	8.88088	2.249	4.8643	22.5211	17.3831	18.3946	12.8341	8.64558	6.86417	11.0415		99	42.3244	43.4332	42.0703
100	48.115	47.1303	42.3738	39.9633	45.2078	54.8191	59.0268	50.0214	27.1119	35.478	26.4602	8.75068	7.65795	4.73392	3.56622	9.71343	11.4592	8.59388	8.92449	7.80926	14.3444	21.5159	22.8464	13.4482	29.8519	22.4789	24.3161	24.0322	32.8834	34.9383	39.4257	28.6718	36.1783	33.3971	8.72301	2.18734	4.74882	22.1432	17.4735	18.6124	12.9808	8.56958	6.75937	11.0314		100	42.1016	43.1278	41.8102
101	47.8205	46.8186	42.1049	39.7734	44.9278	54.7685	58.9632	49.7797	27.0456	35.4112	26.4547	8.7726	7.65373	4.74956	3.46141	9.61979	11.48	8.53307	8.8211	7.65608	14.2933	21.4577	22.7365	13.3882	29.8587	22.5372	24.3505	24.0329	32.8625	35.0307	39.3992	28.6613	35.6847	32.9315	8.56797	2.12767	4.6348	21.7592	17.5669	18.8349	13.1329	8.49606	6.6562	11.0237		101	41.8732	42.8255	41.5487
102	47.5183	46.4981	41.8295	39.5798	44.6419	54.7102	58.8938	49.5361	26.9821	35.3459	26.4479	8.80109	7.65206	4.76575	3.36017	9.53104	11.5001	8.47079	8.71966	7.50542	14.2418	21.3956	22.6212	13.3261	29.8585	22.5938	24.3802	24.0309	32.8368	35.1167	39.3609	28.6444	35.1804	32.4603	8.41596	2.06997	4.52231	21.3697	17.6635	19.0619	13.2905	8.42511	6.55473	11.0183		102	41.6394	42.5269	41.2859
103	47.2091	46.1692	41.5481	39.3828	44.3506	54.6444	58.8189	49.2911	26.922	35.2826	26.4402	8.83617	7.65286	4.78238	3.26264	9.44748	11.5195	8.40706	8.62025	7.35743	14.19	21.3296	22.5005	13.262	29.8515	22.6486	24.4052	24.0263	32.8066	35.1967	39.3111	28.6211	34.6665	31.9844	8.26721	2.01425	4.41144	20.9756	17.7636	19.2934	13.4536	8.35679	6.45503	11.0154		103	41.4004	42.2326	41.0221
104	46.8935	45.8327	41.261	39.1824	44.0541	54.5714	58.7388	49.0452	26.8658	35.222	26.4318	8.87784	7.65611	4.79932	3.16896	9.36939	11.5381	8.3419	8.52292	7.2122	14.1379	21.26	22.3749	13.196	29.8374	22.7016	24.4252	24.0192	32.772	35.2708	39.2498	28.5916	34.1439	31.5047	8.12192	1.96047	4.30225	20.5776	17.8676	19.5293	13.6224	8.29119	6.35718	11.0148		104	41.1567	41.9429	40.7574
105	46.5722	45.489	40.9685	38.9789	43.7527	54.4914	58.6535	48.7989	26.8141	35.1643	26.423	8.92609	7.66172	4.81647	3.07927	9.29704	11.5557	8.27536	8.42774	7.06986	14.0854	21.1871	22.2446	13.1281	29.8165	22.7527	24.4403	24.0095	32.7333	35.3392	39.1772	28.5559	33.6138	31.0221	7.98026	1.90862	4.19478	20.1765	17.9757	19.7695	13.797	8.22834	6.26124	11.0166		105	40.9084	41.6584	40.492
106	46.2459	45.1389	40.6711	38.7724	43.4467	54.4046	58.5634	48.5527	26.7674	35.1103	26.414	8.98091	7.66965	4.8337	2.99367	9.23069	11.5722	8.20747	8.33476	6.9305	14.0326	21.111	22.1098	13.0585	29.7886	22.8018	24.4504	23.9973	32.6908	35.4023	39.0936	28.514	33.0771	30.5373	7.84239	1.85866	4.08909	19.7731	18.0883	20.0137	13.9773	8.16829	6.16726	11.0208		106	40.656	41.3796	40.226
107	45.9153	44.7829	40.3691	38.563	43.1365	54.3113	58.4686	48.307	26.7262	35.0603	26.405	9.04225	7.67982	4.8509	2.91229	9.17057	11.5876	8.13827	8.24402	6.79421	13.9795	21.0319	21.971	12.9872	29.7538	22.8489	24.4555	23.9826	32.6448	35.4601	38.9992	28.466	32.5347	30.0511	7.70847	1.81058	3.98521	19.368	18.2055	20.262	14.1636	8.11106	6.07533	11.0273		107	40.3997	41.1069	39.9596
108	45.581	44.4216	40.063	38.3509	42.8223	54.2115	58.3693	48.0623	26.691	35.0148	26.3963	9.11005	7.69216	4.86794	2.83523	9.11692	11.6017	8.06779	8.15556	6.66109	13.926	20.9502	21.8284	12.9142	29.7122	22.8937	24.4555	23.9655	32.5955	35.5131	38.8942	28.4121	31.9877	29.5644	7.57862	1.76433	3.88317	18.9621	18.3277	20.5142	14.3558	8.05667	5.98548	11.036		108	40.1399	40.8406	39.6929
109	45.2436	44.0557	39.753	38.1361	42.5044	54.1056	58.2656	47.8191	26.6623	34.9741	26.388	9.18427	7.7066	4.88471	2.76256	9.06993	11.6144	7.99608	8.0694	6.53121	13.8722	20.8659	21.6823	12.8397	29.6638	22.9364	24.4505	23.946	32.5432	35.5613	38.7788	28.3523	31.4371	29.078	7.45296	1.7199	3.783	18.5559	18.4552	20.7701	14.5539	8.00512	5.8978	11.0469		109	39.8769	40.5811	39.4262
110	44.9038	43.6857	39.4395	37.9189	42.1831	53.9936	58.1578	47.5776	26.6404	34.9387	26.3804	9.26481	7.72306	4.90108	2.69438	9.0298	11.6256	7.92319	7.98557	6.40463	13.8179	20.7793	21.533	12.7638	29.6089	22.9767	24.4403	23.9241	32.4881	35.6052	38.6534	28.2868	30.8837	28.5924	7.33159	1.67723	3.68471	18.1502	18.5882	21.0297	14.7581	7.9564	5.81232	11.0599		110	39.611	40.3289	39.1595
111	44.5622	43.3122	39.1229	37.6993	41.8587	53.8759	58.046	47.3384	26.6257	34.9088	26.3737	9.35159	7.74146	4.91695	2.63075	8.99669	11.6354	7.84915	7.90409	6.28142	13.7633	20.6907	21.3808	12.6865	29.5473	23.0147	24.4251	23.9	32.4305	35.6448	38.5182	28.2157	30.3286	28.1085	7.21458	1.63631	3.58832	17.7456	18.727	21.2927	14.9682	7.91049	5.72912	11.0749		111	39.3427	40.0841	38.893
112	44.2193	42.9358	38.8036	37.4773	41.5315	53.7526	57.9303	47.1018	26.6186	34.8847	26.3679	9.44449	7.76172	4.93221	2.57174	8.97075	11.6434	7.77403	7.82494	6.16163	13.7082	20.6003	21.226	12.6078	29.4794	23.0503	24.4047	23.8735	32.3705	35.6805	38.3735	28.1392	29.7725	27.6269	7.10201	1.59708	3.49382	17.3427	18.8718	21.559	15.1844	7.86736	5.64823	11.0918		112	39.0722	39.8471	38.6269
113	43.8758	42.557	38.4819	37.2531	41.2018	53.624	57.811	46.868	26.6193	34.8668	26.3633	9.5434	7.78377	4.94674	2.51739	8.95212	11.6498	7.69786	7.74815	6.04531	13.6525	20.5083	21.0689	12.5279	29.4052	23.0834	24.3793	23.8447	32.3085	35.7125	38.2197	28.0574	29.2165	27.1483	6.99394	1.55951	3.40122	16.9421	19.0227	21.8285	15.4066	7.82697	5.56972	11.1104		113	38.7999	39.6181	38.3612
114	43.5323	42.1765	38.1581	37.0268	40.8697	53.4901	57.688	46.6376	26.6282	34.8552	26.3601	9.6482	7.80751	4.96044	2.46774	8.94092	11.6544	7.6207	7.67368	5.93249	13.5964	20.4148	20.9098	12.4469	29.325	23.114	24.3487	23.8137	32.2447	35.741	38.0571	27.9705	28.6614	26.6732	6.89038	1.52357	3.31052	16.5444	19.1801	22.1009	15.6347	7.78926	5.49362	11.1307		114	38.5261	39.3973	38.0963
115	43.1893	41.7947	37.8327	36.7985	40.5357	53.3513	57.5617	46.4107	26.6456	34.8501	26.3582	9.75873	7.83288	4.97321	2.42283	8.93724	11.6572	7.54259	7.60154	5.82319	13.5396	20.3202	20.749	12.3647	29.2388	23.1419	24.3131	23.7805	32.1793	35.7662	37.886	27.8786	28.1079	26.2022	6.79138	1.48921	3.22169	16.1502	19.3441	22.3762	15.8688	7.75417	5.42	11.1525		115	38.2513	39.1849	37.8321
116	42.8472	41.4123	37.5059	36.5682	40.1999	53.2077	57.432	46.1877	26.6715	34.8518	26.3579	9.87485	7.85979	4.98495	2.38266	8.94115	11.658	7.46361	7.53168	5.71745	13.4822	20.2246	20.5867	12.2814	29.1469	23.1673	24.2726	23.7451	32.1124	35.7885	37.7067	27.782	27.5569	25.7359	6.69694	1.45641	3.13473	15.7599	19.5149	22.6542	16.1087	7.72164	5.34889	11.1756		116	37.9757	38.9811	37.569
117	42.5067	41.0296	37.1781	36.3359	39.8626	53.0595	57.2993	45.9689	26.7062	34.8603	26.3593	9.9964	7.88816	4.99559	2.34726	8.95272	11.6569	7.3838	7.46409	5.61526	13.424	20.1283	20.4232	12.1971	29.0495	23.1899	24.227	23.7076	32.0444	35.8078	37.5197	27.6809	27.0091	25.2748	6.60705	1.42512	3.04961	15.3741	19.6925	22.9346	16.3545	7.69158	5.28033	11.1999		117	37.6998	38.7859	37.3071
118	42.1681	40.6473	36.8496	36.1018	39.5241	52.9069	57.1635	45.7544	26.7499	34.8758	26.3624	10.1232	7.91793	5.00503	2.31662	8.97198	11.6538	7.30322	7.39872	5.51664	13.3651	20.0314	20.2589	12.1119	28.9468	23.2097	24.1765	23.6679	31.9754	35.8246	37.3253	27.5755	26.4653	24.8194	6.5217	1.39531	2.96631	14.9932	19.8772	23.2173	16.6059	7.6639	5.21436	11.2253		118	37.4238	38.5994	37.0466
119	41.832	40.2659	36.5208	35.8659	39.1846	52.7501	57.0249	45.5447	26.8026	34.8983	26.3674	10.2551	7.94901	5.01321	2.29074	8.99896	11.6487	7.22193	7.33553	5.42157	13.3053	19.9342	20.094	12.0258	28.8391	23.2268	24.1211	23.626	31.9055	35.839	37.124	27.4658	25.9262	24.37	6.44086	1.36694	2.88482	14.6178	20.069	23.5022	16.8628	7.63852	5.15102	11.2515		119	37.1483	38.4218	36.7877
120	41.4987	39.8857	36.192	35.6282	38.8444	52.5893	56.8836	45.3398	26.8644	34.9279	26.3743	10.3918	7.98134	5.02005	2.26959	9.03366	11.6414	7.13999	7.27446	5.33005	13.2446	19.8368	19.9287	11.9389	28.7266	23.2411	24.0609	23.5821	31.8351	35.8511	36.916	27.3523	25.3924	23.9272	6.3645	1.33999	2.80509	14.2481	20.268	23.7889	17.1253	7.61533	5.09034	11.2784		120	36.8734	38.253	36.5305
121	41.1688	39.5074	35.8634	35.3889	38.5037	52.4248	56.7396	45.14	26.9354	34.9645	26.3832	10.5333	8.01485	5.02551	2.25314	9.07605	11.632	7.05746	7.21546	5.24206	13.183	19.7395	19.7633	11.8512	28.6096	23.2525	23.996	23.5361	31.7642	35.8612	36.7017	27.2351	24.8645	23.4912	6.29255	1.31442	2.7271	13.8846	20.4743	24.0774	17.393	7.59424	5.03236	11.3057		121	36.5995	38.0929	36.2753
122	40.8425	39.1312	35.5355	35.148	38.1627	52.2567	56.5932	44.9456	27.0155	35.0083	26.3941	10.6792	8.04948	5.02952	2.24137	9.1261	11.6206	6.9744	7.15846	5.15757	13.1203	19.6424	19.5981	11.7628	28.4883	23.261	23.9264	23.488	31.693	35.8694	36.4817	27.1143	24.3432	23.0625	6.22497	1.2902	2.65082	13.5276	20.6879	24.3673	17.6658	7.57512	4.97709	11.3334		122	36.3271	37.9417	36.0224
123	40.5203	38.7578	35.2084	34.9055	37.8217	52.0853	56.4446	44.7565	27.1047	35.059	26.4072	10.8294	8.08516	5.03204	2.23422	9.18377	11.6069	6.89089	7.10339	5.07655	13.0565	19.5456	19.4332	11.6736	28.363	23.2665	23.8522	23.4378	31.6218	35.8759	36.2563	26.9903	23.8289	22.6413	6.16168	1.26732	2.57621	13.1776	20.9087	24.6586	17.9435	7.55786	4.92456	11.3613		123	36.0564	37.7991	35.7719
124	40.2025	38.3873	34.8826	34.6615	37.4809	51.9107	56.2937	44.5732	27.203	35.1168	26.4224	10.9836	8.12185	5.03305	2.23163	9.24897	11.5911	6.80697	7.05017	4.99896	12.9915	19.4495	19.2689	11.5839	28.234	23.2691	23.7736	23.3856	31.5505	35.8809	36.0258	26.8632	23.3222	22.2279	6.1026	1.24574	2.50324	12.8347	21.1368	24.9511	18.226	7.54235	4.87479	11.389		124	35.7878	37.6651	35.524
125	39.8893	38.0204	34.5583	34.416	37.1406	51.7332	56.1408	44.3955	27.3102	35.1814	26.4398	11.1417	8.15948	5.03253	2.23356	9.32161	11.5732	6.72273	6.99874	4.92475	12.9252	19.3541	19.1055	11.4935	28.1016	23.2687	23.6905	23.3313	31.4794	35.8844	35.7908	26.7333	22.8235	21.8226	6.04763	1.22544	2.43188	12.4993	21.3722	25.2444	18.5131	7.52846	4.82779	11.4166		125	35.5216	37.5396	35.2791
126	39.5812	37.6572	34.2357	34.1692	36.8009	51.553	55.9861	44.2238	27.4263	35.2527	26.4595	11.3033	8.19802	5.03045	2.23992	9.40159	11.5531	6.63823	6.94899	4.85387	12.8577	19.2597	18.9431	11.4026	27.966	23.2654	23.6032	23.2751	31.4086	35.8867	35.5516	26.6007	22.3332	21.4256	5.9967	1.20641	2.36209	12.1717	21.6146	25.5385	18.8044	7.51608	4.78358	11.4436		126	35.2581	37.4225	35.0374
127	39.2783	37.2983	33.9152	33.921	36.4621	51.3702	55.8296	44.0581	27.5509	35.3306	26.4814	11.4683	8.23741	5.02682	2.25064	9.48878	11.5309	6.55354	6.90084	4.78626	12.7888	19.1663	18.782	11.3112	27.8277	23.259	23.5117	23.2168	31.3383	35.8877	35.3086	26.4658	21.8517	21.0371	5.94968	1.18861	2.29383	11.8521	21.8641	25.8331	19.0997	7.50507	4.74217	11.4701		127	34.9978	37.3134	34.799
128	38.9808	36.9438	33.5971	33.6715	36.1245	51.1853	55.6716	43.8984	27.6841	35.415	26.5055	11.6364	8.27762	5.02164	2.26563	9.58304	11.5066	6.46872	6.85421	4.72186	12.7184	19.0741	18.6223	11.2193	27.6868	23.2495	23.4161	23.1565	31.2685	35.8877	35.0622	26.3287	21.3794	20.6573	5.90648	1.17205	2.22707	11.5406	22.1205	26.1279	19.3989	7.49531	4.70355	11.4957		128	34.7408	37.2123	34.5644
129	38.6891	36.5941	33.2815	33.4209	35.7881	50.9983	55.5122	43.7449	27.8255	35.5056	26.5319	11.8074	8.31861	5.01493	2.2848	9.68421	11.4803	6.38386	6.80898	4.6606	12.6466	18.9833	18.4642	11.127	27.5437	23.2371	23.3165	23.0942	31.1993	35.8868	34.8129	26.1896	20.9166	20.2862	5.86697	1.15671	2.16177	11.2375	22.3837	26.4229	19.7015	7.48668	4.66772	11.5203		129	34.4874	37.119	34.3337
130	38.4032	36.2496	32.9688	33.1692	35.4532	50.8094	55.3515	43.5977	27.9748	35.6023	26.5606	11.981	8.36035	5.00671	2.30805	9.7921	11.4518	6.299	6.76508	4.6024	12.5733	18.8939	18.3079	11.0343	27.3987	23.2215	23.2131	23.0299	31.1309	35.8849	34.561	26.0488	20.4634	19.924	5.83103	1.14257	2.0979	10.9429	22.6535	26.7177	20.0074	7.47905	4.63469	11.5437		130	34.2381	37.0331	34.1073
131	38.1234	35.9104	32.6592	32.9164	35.1201	50.619	55.1898	43.4567	28.1319	35.7047	26.5916	12.157	8.40281	4.99703	2.33527	9.90654	11.4214	6.21424	6.72238	4.54719	12.4984	18.8062	18.1535	10.9413	27.2521	23.203	23.1061	22.9637	31.0633	35.8822	34.3069	25.9064	20.0202	19.5708	5.79853	1.12962	2.03543	10.6571	22.9296	27.0122	20.3163	7.4723	4.60443	11.5657		131	33.993	36.9543	33.8853
132	37.8498	35.5768	32.353	32.6627	34.7888	50.4273	55.0271	43.3219	28.2964	35.8128	26.6249	12.3351	8.44596	4.98593	2.36636	10.0273	11.3891	6.12965	6.6808	4.49488	12.4219	18.7203	18.0012	10.848	27.1042	23.1814	22.9955	22.8955	30.9967	35.8788	34.051	25.7627	19.5871	19.2267	5.76934	1.11787	1.97432	10.38	23.2118	27.3062	20.6278	7.4663	4.57693	11.5862		132	33.7524	36.8826	33.6681
133	37.5825	35.2491	32.0504	32.4081	34.4597	50.2344	54.8637	43.1935	28.468	35.9262	26.6605	12.5151	8.4898	4.97347	2.40118	10.1542	11.3548	6.04528	6.64023	4.44539	12.3438	18.6362	17.8512	10.7545	26.9552	23.1568	22.8814	22.8254	30.931	35.8747	33.7938	25.6178	19.1642	18.8916	5.74332	1.10729	1.91454	10.1118	23.5	27.5994	20.9416	7.46093	4.55218	11.605		133	33.5166	36.8174	33.456
134	37.3216	34.9274	31.7516	32.1527	34.1329	50.0406	54.6998	43.0714	28.6463	36.0446	26.6983	12.6967	8.53429	4.95971	2.43963	10.287	11.3187	5.96123	6.60055	4.39863	12.264	18.5541	17.7036	10.6608	26.8055	23.1291	22.7641	22.7533	30.8665	35.8699	33.5355	25.4719	18.7517	18.5656	5.72034	1.0979	1.85606	9.85259	23.7938	27.8918	21.2575	7.45607	4.53014	11.6219		134	33.2859	36.7585	33.2491
135	37.0671	34.612	31.4568	31.8967	33.8086	49.8462	54.5355	42.9555	28.8311	36.1679	26.7384	12.8797	8.57943	4.94473	2.48156	10.4254	11.2808	5.87756	6.56168	4.3545	12.1826	18.4741	17.5584	10.567	26.6553	23.0985	22.6437	22.6793	30.803	35.8645	33.2765	25.3253	18.3495	18.2486	5.70024	1.08968	1.79885	9.60241	24.0929	28.1829	21.5751	7.45162	4.51079	11.6367		135	33.0604	36.7056	33.0479
136	36.8192	34.3029	31.1663	31.6402	33.4869	49.6513	54.371	42.8458	29.0218	36.2956	26.7807	13.0638	8.62519	4.9286	2.52684	10.5691	11.2413	5.79434	6.52349	4.31292	12.0994	18.3962	17.4159	10.473	26.505	23.0648	22.5204	22.6035	30.7407	35.8585	33.0173	25.178	17.9578	17.9408	5.68287	1.08263	1.74289	9.36131	24.3971	28.4728	21.8941	7.44745	4.49409	11.6493		136	32.8405	36.6583	32.8526
137	36.5778	34.0004	30.8802	31.3832	33.1681	49.4562	54.2065	42.7423	29.2181	36.4275	26.8252	13.2488	8.67158	4.91144	2.57534	10.718	11.2001	5.71165	6.48589	4.27377	12.0146	18.3206	17.276	10.3791	26.3548	23.0283	22.3942	22.5258	30.6796	35.8518	32.7581	25.0303	17.5765	17.6419	5.6681	1.07675	1.68815	9.12929	24.7059	28.7611	22.2142	7.44346	4.48	11.6596		137	32.6262	36.6162	32.6633
138	36.3431	33.7045	30.5987	31.1259	32.8522	49.2611	54.0421	42.6448	29.4196	36.5633	26.8718	13.4343	8.71858	4.89332	2.62691	10.8717	11.1573	5.62956	6.44877	4.23697	11.928	18.2473	17.139	10.2852	26.2049	22.9888	22.2654	22.4462	30.6198	35.8446	32.4992	24.8823	17.2056	17.3519	5.65575	1.07205	1.6346	8.90638	25.0191	29.0477	22.535	7.43955	4.46847	11.6675		138	32.4179	36.5791	32.4804
139	36.1148	33.4153	30.3221	30.8683	32.5396	49.0662	53.8781	42.5534	29.6258	36.7026	26.9207	13.6203	8.76619	4.87437	2.68141	11.0299	11.1131	5.54815	6.41203	4.2024	11.8398	18.1765	17.0048	10.1913	26.0555	22.9464	22.1341	22.3648	30.5613	35.8367	32.2411	24.7341	16.8449	17.0709	5.64569	1.06851	1.58222	8.69254	25.3362	29.3325	22.8563	7.43562	4.45946	11.6727		139	32.2156	36.5465	32.3042
140	35.8932	33.133	30.0506	30.6108	32.2302	48.8718	53.7146	42.4679	29.8363	36.8452	26.9716	13.8063	8.81439	4.85469	2.73869	11.1923	11.0675	5.46748	6.37557	4.16998	11.7499	18.1082	16.8737	10.0977	25.907	22.9012	22.0006	22.2816	30.5041	35.8281	31.9839	24.5859	16.4945	16.7986	5.63776	1.06614	1.531	8.48776	25.657	29.6152	23.1777	7.43157	4.4529	11.6753		140	32.0196	36.518	32.1348
141	35.678	32.8576	29.7841	30.3533	31.9244	48.678	53.5518	42.3881	30.0507	36.9907	27.0247	13.9922	8.86318	4.83441	2.79858	11.3586	11.0205	5.38762	6.33929	4.13958	11.6584	18.0424	16.7455	10.0042	25.7595	22.8532	21.8648	22.1967	30.4482	35.8189	31.728	24.4378	16.1541	16.535	5.63179	1.06495	1.48091	8.29199	25.9809	29.8956	23.499	7.42732	4.44875	11.675		141	31.83	36.4934	31.9725
142	35.4693	32.5891	29.5231	30.096	31.6222	48.4851	53.39	42.3139	30.2685	37.1389	27.0797	14.1777	8.91256	4.81364	2.86095	11.5285	10.9724	5.30865	6.30309	4.11112	11.5652	17.9792	16.6205	9.91104	25.6133	22.8025	21.7272	22.11	30.3937	35.809	31.4738	24.29	15.8237	16.2799	5.62762	1.06491	1.43193	8.10518	26.3076	30.1737	23.8198	7.42279	4.44692	11.6718		142	31.647	36.4721	31.8175
143	35.267	32.3275	29.2675	29.8392	31.3237	48.2933	53.2292	42.2453	30.4893	37.2893	27.1368	14.3626	8.96251	4.79253	2.92562	11.7017	10.9232	5.23064	6.26688	4.08449	11.4705	17.9187	16.4986	9.81824	25.4685	22.7492	21.5877	22.0217	30.3405	35.7984	31.2213	24.1425	15.503	16.0332	5.62511	1.06605	1.38405	7.92724	26.6368	30.4492	24.1398	7.41788	4.44735	11.6655		143	31.4706	36.4538	31.67
144	35.0709	32.073	29.0175	29.5829	31.0292	48.1027	53.0697	42.1819	30.7125	37.4417	27.1959	14.5467	9.01303	4.77121	2.99244	11.8778	10.8729	5.15364	6.23057	4.05957	11.3743	17.8609	16.38	9.72586	25.3254	22.6932	21.4467	21.9317	30.2887	35.7869	30.971	23.9954	15.1918	15.7949	5.62409	1.06835	1.33726	7.75811	26.9679	30.722	24.4588	7.41255	4.44997	11.6562		144	31.301	36.4382	31.5301
145	34.8811	31.8254	28.7733	29.3273	30.7387	47.9136	52.9116	42.1237	30.9377	37.5958	27.2568	14.7297	9.06411	4.74981	3.06125	12.0565	10.8217	5.07774	6.19408	4.03627	11.2766	17.8058	16.2645	9.634	25.184	22.6347	21.3042	21.8402	30.2383	35.7746	30.7229	23.8488	14.8899	15.5647	5.6244	1.0718	1.29153	7.59767	27.3005	30.992	24.7765	7.40671	4.4547	11.6438		145	31.1382	36.4248	31.398
146	34.6974	31.5847	28.535	29.0725	30.4523	47.7261	52.7551	42.0705	31.1644	37.7511	27.3196	14.9113	9.11573	4.72847	3.13189	12.2374	10.7696	5.00298	6.15731	4.01449	11.1775	17.7535	16.1524	9.54272	25.0446	22.5738	21.1605	21.7471	30.1891	35.7614	30.4775	23.7029	14.5971	15.3424	5.62588	1.07641	1.24687	7.44582	27.6342	31.259	25.0926	7.40031	4.46145	11.6281		146	30.9823	36.4133	31.274
147	34.5197	31.3509	28.3026	28.8188	30.1703	47.5404	52.6004	42.022	31.3921	37.9076	27.3842	15.0914	9.16788	4.70734	3.20419	12.4202	10.7168	4.92944	6.12021	3.99412	11.077	17.7041	16.0435	9.45212	24.9073	22.5105	21.0157	21.6525	30.1413	35.7471	30.2347	23.5576	14.3132	15.128	5.62837	1.08216	1.20325	7.30244	27.9686	31.523	25.4069	7.3933	4.47013	11.6092		147	30.8334	36.4033	31.158
148	34.3479	31.124	28.0764	28.5664	29.8926	47.3567	52.4476	41.978	31.6204	38.0647	27.4506	15.2698	9.22054	4.68656	3.27799	12.6046	10.6633	4.85717	6.08268	3.97506	10.9753	17.6574	15.938	9.36227	24.7721	22.445	20.8701	21.5565	30.0948	35.7318	29.995	23.413	14.0377	14.9212	5.63172	1.08904	1.16067	7.1674	28.3032	31.7837	25.7192	7.38563	4.48065	11.587		148	30.6915	36.3945	31.0502
149	34.1818	30.9038	27.8563	28.3154	29.6194	47.1751	52.2968	41.9384	31.8488	38.2223	27.5187	15.4462	9.27368	4.66627	3.35312	12.7902	10.6093	4.78623	6.04467	3.95722	10.8725	17.6137	15.8358	9.27326	24.6393	22.3773	20.7237	21.4592	30.0496	35.7154	29.7583	23.2692	13.7706	14.7219	5.63577	1.09705	1.11913	7.04056	28.6377	32.0411	26.0292	7.37726	4.49292	11.5615		149	30.5567	36.3865	30.9507
150	34.0213	30.6903	27.6425	28.0659	29.3508	46.9958	52.1483	41.9028	32.0769	38.38	27.5884	15.6204	9.32728	4.64661	3.42943	12.9766	10.5547	4.71668	6.00611	3.9405	10.7685	17.5728	15.737	9.18519	24.5088	22.3075	20.5769	21.3606	30.0056	35.6978	29.5249	23.1262	13.5114	14.5299	5.64037	1.10617	1.07861	6.92177	28.9714	32.295	26.3368	7.36815	4.50683	11.5326		150	30.4288	36.379	30.8595
151	33.8662	30.4835	27.4351	27.8183	29.0869	46.8188	52.0022	41.8711	32.3041	38.5376	27.6597	15.7922	9.38132	4.62773	3.50674	13.1636	10.4998	4.64857	5.96694	3.92479	10.6636	17.5347	15.6415	9.09813	24.3809	22.2357	20.4297	21.2608	29.9628	35.6789	29.2949	22.984	13.2599	14.345	5.64535	1.11637	1.03911	6.81089	29.3041	32.5455	26.6417	7.35828	4.52229	11.5004		151	30.308	36.3716	30.7766
152	33.7165	30.2831	27.2341	27.5726	28.8278	46.6444	51.8585	41.8429	32.5301	38.6949	27.7325	15.9614	9.43574	4.60976	3.58491	13.3507	10.4446	4.58194	5.92712	3.91001	10.5577	17.4995	15.5494	9.01219	24.2555	22.1621	20.2823	21.1598	29.9213	35.6587	29.0685	22.8427	13.0157	14.1671	5.65057	1.12765	1.00063	6.70773	29.6353	32.7923	26.9439	7.34762	4.53918	11.4649		152	30.1942	36.364	30.7021
153	33.572	30.0892	27.0395	27.3292	28.5735	46.4725	51.7175	41.8181	32.7544	38.8515	27.8068	16.1279	9.49052	4.59284	3.66376	13.5376	10.3892	4.51684	5.8866	3.89608	10.4511	17.4672	15.4607	8.92745	24.1326	22.0868	20.1349	21.0578	29.8808	35.637	28.8457	22.7022	12.7786	13.9959	5.65588	1.13997	0.963164	6.61213	29.9646	33.0354	27.2432	7.33616	4.5574	11.4261		153	30.0873	36.356	30.6359
154	33.4325	29.9015	26.8514	27.0881	28.3242	46.3034	51.5791	41.7963	32.9766	39.0072	27.8825	16.2914	9.5456	4.57709	3.74314	13.724	10.3336	4.45332	5.84533	3.88289	10.3438	17.4377	15.3754	8.844	24.0124	22.01	19.9878	20.9549	29.8415	35.6138	28.6267	22.5627	12.5483	13.8312	5.66113	1.15332	0.926705	6.52392	30.2916	33.2748	27.5394	7.32389	4.57684	11.384		154	29.9872	36.3471	30.5781
155	33.2979	29.72	26.6698	26.8495	28.0798	46.137	51.4436	41.7773	33.1962	39.1619	27.9595	16.4519	9.60094	4.56265	3.8229	13.9096	10.278	4.39141	5.80329	3.87038	10.236	17.4111	15.2935	8.76194	23.8949	21.9316	19.841	20.8511	29.8032	35.589	28.4115	22.424	12.3244	13.673	5.66617	1.16766	0.891254	6.4429	30.6158	33.5103	27.8325	7.3108	4.59739	11.3387		155	29.894	36.3373	30.5285
156	33.168	29.5446	26.4948	26.6138	27.8405	45.9736	51.311	41.7608	33.4129	39.3153	28.0377	16.609	9.65647	4.54963	3.90287	14.094	10.2224	4.33116	5.76045	3.85845	10.1277	17.3873	15.2149	8.68135	23.78	21.852	19.6947	20.7465	29.7659	35.5626	28.2001	22.2862	12.1066	13.521	5.67085	1.18296	0.85681	6.3689	30.9369	33.742	28.1223	7.29689	4.61894	11.2901		156	29.8074	36.3261	30.4869
157	33.0427	29.375	26.3264	26.381	27.6063	45.813	51.1814	41.7466	33.6262	39.4671	28.1172	16.7627	9.71213	4.53815	3.98292	14.2769	10.1669	4.27258	5.71678	3.84702	10.0192	17.3663	15.1397	8.60234	23.6677	21.7711	19.5491	20.6412	29.7296	35.5344	27.9927	22.1492	11.8946	13.3749	5.67505	1.19919	0.823372	6.3017	31.2545	33.9697	28.4088	7.28218	4.64136	11.2385		157	29.7275	36.3133	30.4534
158	32.9217	29.2112	26.1645	26.1513	27.3773	45.6555	51.0548	41.7343	33.8359	39.6173	28.1977	16.9127	9.76785	4.52831	4.06289	14.4579	10.1116	4.21572	5.67228	3.83604	9.91042	17.348	15.0678	8.52498	23.5581	21.6893	19.4044	20.5354	29.6942	35.5045	27.7893	22.0131	11.6881	13.2347	5.67862	1.2163	0.790941	6.24113	31.5682	34.1934	28.6919	7.26666	4.66454	11.1837		158	29.654	36.2988	30.4278
159	32.8051	29.053	26.0092	25.925	27.1535	45.5009	50.9314	41.7238	34.0415	39.7657	28.2794	17.0591	9.82356	4.52022	4.14264	14.6369	10.0564	4.16058	5.62692	3.82541	9.80162	17.3325	14.9993	8.44936	23.4511	21.6066	19.2607	20.4291	29.6596	35.4727	27.5899	21.8779	11.4868	13.1002	5.68144	1.23426	0.759515	6.18696	31.8777	34.4131	28.9717	7.25036	4.68837	11.1259		159	29.5868	36.2823	30.4098
160	32.6926	28.9002	25.8604	25.7023	26.9348	45.3494	50.8111	41.7146	34.2427	39.9121	28.362	17.2015	9.87917	4.51395	4.22203	14.8134	10.0015	4.10721	5.58072	3.81508	9.69291	17.3197	14.9341	8.37557	23.3466	21.5231	19.1182	20.3225	29.6259	35.439	27.3946	21.7434	11.2905	12.9711	5.68335	1.25302	0.729097	6.139	32.1827	34.6286	29.2481	7.2333	4.71273	11.0653		160	29.5258	36.2635	30.3994
161	32.5841	28.7528	25.7181	25.4833	26.7215	45.201	50.694	41.7066	34.4393	40.0564	28.4455	17.34	9.93459	4.5096	4.30091	14.9872	9.94701	4.05561	5.53366	3.80498	9.58441	17.3095	14.8722	8.3037	23.2447	21.4392	18.9769	20.2157	29.5929	35.4033	27.2032	21.6097	11.0988	12.8473	5.68426	1.27253	0.699687	6.09704	32.4828	34.8401	29.521	7.2155	4.73751	11.0017		161	29.4709	36.2425	30.3962
162	32.4794	28.6105	25.5824	25.2682	26.5134	45.0556	50.58	41.6994	34.6308	40.1984	28.5298	17.4743	9.98973	4.50724	4.37917	15.158	9.89285	4.00579	5.48577	3.79505	9.47627	17.3019	14.8136	8.23381	23.1453	21.3548	18.8372	20.1088	29.5606	35.3656	27.0158	21.4767	10.9115	12.7286	5.68402	1.29275	0.671287	6.06086	32.7778	35.0474	29.7906	7.19699	4.76258	10.9355		162	29.4218	36.2188	30.4
163	32.3784	28.4733	25.453	25.0572	26.3106	44.9132	50.4693	41.6928	34.8171	40.3382	28.615	17.6044	10.0445	4.50692	4.45666	15.3256	9.83911	3.95776	5.43705	3.78524	9.36862	17.2969	14.7583	8.16599	23.0483	21.2703	18.699	20.0019	29.5289	35.3259	26.8325	21.3445	10.7283	12.6148	5.68252	1.31361	0.643898	6.03025	33.0672	35.2506	30.0569	7.1778	4.78784	10.8666		163	29.3784	36.1925	30.4105
164	32.2811	28.3409	25.3301	24.8505	26.1131	44.7739	50.3618	41.6866	34.9978	40.4755	28.7008	17.7301	10.0988	4.5087	4.53327	15.4897	9.78583	3.91153	5.38753	3.77548	9.2616	17.2943	14.7062	8.10031	22.9536	21.1857	18.5626	19.8951	29.4979	35.2841	26.6531	21.2129	10.549	12.5058	5.67966	1.33506	0.617521	6.005	33.351	35.4495	30.3199	7.15798	4.81317	10.7951		164	29.3404	36.1634	30.4275
165	32.1872	28.2132	25.2135	24.6482	25.921	44.6375	50.2575	41.6805	35.1727	40.6104	28.7872	17.8514	10.1524	4.51262	4.60887	15.6501	9.73304	3.86711	5.33723	3.76574	9.15534	17.2942	14.6574	8.03683	22.8613	21.1012	18.428	19.7886	29.4674	35.2402	26.4776	21.082	10.3733	12.4014	5.67531	1.35704	0.592159	5.98489	33.6288	35.6442	30.5796	7.13755	4.83846	10.7213		165	29.3077	36.1314	30.4507
166	32.0966	28.0902	25.1031	24.4506	25.7341	44.5041	50.1563	41.6743	35.3416	40.7427	28.8742	17.9682	10.2054	4.5187	4.68335	15.8064	9.68079	3.82447	5.28618	3.75596	9.04999	17.2964	14.6119	7.97562	22.7711	21.0172	18.2955	19.6825	29.4373	35.1942	26.3059	20.9517	10.201	12.3014	5.66939	1.37949	0.567813	5.9697	33.9004	35.8347	30.8362	7.11657	4.8636	10.6451		166	29.2801	36.0964	30.4797
167	32.0093	27.9715	24.9989	24.2577	25.5526	44.3735	50.0582	41.6677	35.5044	40.8725	28.9617	18.0803	10.2575	4.52698	4.75661	15.9587	9.62908	3.78363	5.23443	3.7461	8.94568	17.301	14.5695	7.91672	22.6831	20.9336	18.165	19.577	29.4078	35.1461	26.1381	20.822	10.0319	12.2056	5.66178	1.40235	0.544485	5.95922	34.1656	36.0208	31.0897	7.09507	4.88848	10.5668		167	29.2574	36.0584	30.5142
168	31.925	27.8572	24.9007	24.0699	25.3764	44.2458	49.9632	41.6605	35.6607	40.9997	29.0496	18.1878	10.3087	4.53744	4.82854	16.1065	9.57795	3.74456	5.182	3.73613	8.84255	17.3077	14.5303	7.8602	22.5971	20.8507	18.0368	19.4721	29.3786	35.0959	25.9741	20.6928	9.86587	12.114	5.6524	1.42555	0.522178	5.95323	34.4242	36.2027	31.3403	7.0731	4.91301	10.4864		168	29.2393	36.0171	30.5538
169	31.8438	27.747	24.8086	23.8871	25.2054	44.1209	49.8711	41.6525	35.8105	41.1244	29.1379	18.2906	10.3588	4.55009	4.89903	16.2497	9.52742	3.70726	5.12895	3.726	8.74073	17.3166	14.4944	7.80609	22.5132	20.7687	17.9108	19.368	29.3498	35.0436	25.8137	20.5642	9.70265	12.0263	5.64117	1.44902	0.500893	5.9515	34.6761	36.3802	31.588	7.05072	4.93707	10.4041		169	29.2256	35.9727	30.5981
170	31.7655	27.6409	24.7223	23.7095	25.0398	43.9986	49.782	41.6435	35.9537	41.2464	29.2264	18.3885	10.4076	4.56492	4.968	16.3882	9.47748	3.6717	5.07532	3.71569	8.64035	17.3275	14.4615	7.75443	22.4311	20.6878	17.7873	19.2649	29.3212	34.9893	25.657	20.4361	9.54209	11.9424	5.628	1.47269	0.480631	5.95384	34.9211	36.5533	31.8329	7.02796	4.96058	10.32		170	29.2161	35.9251	30.6468
171	31.6901	27.5387	24.6418	23.5373	24.8794	43.879	49.6956	41.6333	36.09	41.3659	29.3152	18.4816	10.4552	4.58188	5.03535	16.5219	9.42816	3.63786	5.02117	3.70516	8.54155	17.3404	14.4318	7.70526	22.3508	20.6081	17.6663	19.1629	29.293	34.9329	25.5037	20.3084	9.38406	11.8621	5.61282	1.49649	0.461396	5.96002	35.159	36.7221	32.0752	7.00488	4.98344	10.2343		171	29.2105	35.8743	30.6995
172	31.6174	27.4403	24.5669	23.3707	24.7242	43.7618	49.612	41.6218	36.2195	41.4828	29.4041	18.5699	10.5012	4.60095	5.10101	16.6505	9.37946	3.60573	4.96655	3.69439	8.44444	17.3552	14.4052	7.6586	22.2723	20.5299	17.548	19.062	29.265	34.8744	25.354	20.1812	9.22842	11.7854	5.59556	1.52036	0.443189	5.96984	35.3898	36.8864	32.315	6.98153	5.00556	10.147		172	29.2086	35.8203	30.7557
173	31.5474	27.3456	24.4976	23.2096	24.5742	43.6471	49.531	41.6088	36.342	41.5972	29.4931	18.6532	10.5455	4.62207	5.1649	16.7739	9.33138	3.57527	4.91153	3.68336	8.34915	17.3717	14.3817	7.61447	22.1955	20.4534	17.4323	18.9626	29.2371	34.814	25.2076	20.0545	9.07504	11.7119	5.57617	1.54421	0.426011	5.98307	35.6134	37.0462	32.5524	6.95796	5.02686	10.0584		173	29.2103	35.763	30.815
174	31.4799	27.2544	24.4336	23.0544	24.4293	43.5347	49.4525	41.5941	36.4575	41.7092	29.5821	18.7317	10.5882	4.64518	5.22694	16.892	9.28391	3.54645	4.85616	3.67205	8.25581	17.39	14.3612	7.57287	22.1202	20.3786	17.3193	18.8646	29.2095	34.7518	25.0645	19.9281	8.92383	11.6417	5.55458	1.56798	0.409865	5.99952	35.8297	37.2016	32.7875	6.93422	5.04725	9.96858		174	29.2152	35.7026	30.877
175	31.415	27.1668	24.3749	22.9049	24.2896	43.4245	49.3764	41.5778	36.5659	41.8188	29.6711	18.8052	10.6288	4.6702	5.28706	17.0048	9.23706	3.51923	4.80051	3.66044	8.16452	17.4098	14.3438	7.53381	22.0465	20.3059	17.2093	18.7683	29.182	34.6876	24.9246	19.8022	8.77469	11.5745	5.53077	1.59159	0.394752	6.01899	36.0387	37.3523	33.0206	6.91035	5.06666	9.87764		175	29.2231	35.639	30.9413
176	31.3525	27.0825	24.3213	22.7614	24.155	43.3164	49.3026	41.5596	36.6672	41.9261	29.76	18.8737	10.6675	4.69706	5.34521	17.1121	9.19082	3.49359	4.74466	3.64851	8.0754	17.4312	14.3294	7.49728	21.9742	20.2353	17.1021	18.6737	29.1546	34.6218	24.7878	19.6768	8.62755	11.5103	5.50468	1.61497	0.380673	6.04126	36.2403	37.4985	33.2516	6.88642	5.08502	9.78575		176	29.2339	35.5723	31.0074
177	31.2924	27.0015	24.2727	22.624	24.0254	43.2103	49.2308	41.5394	36.7615	42.0311	29.8487	18.9374	10.7039	4.72565	5.40133	17.2139	9.14516	3.46949	4.68865	3.63626	7.98855	17.4539	14.3179	7.46328	21.9034	20.1672	16.9978	18.5811	29.1274	34.5542	24.654	19.5517	8.48234	11.4488	5.47629	1.63806	0.36763	6.06616	36.4345	37.6399	33.4807	6.86245	5.10225	9.69305		177	29.2472	35.5026	31.075
178	31.2347	26.9238	24.2289	22.4926	23.9007	43.1061	49.161	41.5173	36.8486	42.1339	29.9372	18.9961	10.7381	4.75587	5.45537	17.3101	9.1001	3.44688	4.63258	3.62366	7.90409	17.4779	14.3094	7.43179	21.8339	20.1015	16.8966	18.4904	29.1002	34.485	24.5231	19.4272	8.33901	11.39	5.44557	1.66077	0.355625	6.09347	36.6213	37.7767	33.708	6.83851	5.11831	9.59967		178	29.2628	35.43	31.1435
179	31.1792	26.8492	24.1897	22.3675	23.7811	43.0037	49.093	41.4931	36.9288	42.2347	30.0254	19.0499	10.7697	4.78761	5.50728	17.4007	9.0556	3.42572	4.5765	3.61073	7.8221	17.5031	14.3039	7.40277	21.7657	20.0386	16.7985	18.402	29.0731	34.4144	24.395	19.303	8.19753	11.3338	5.41252	1.68304	0.344659	6.12302	36.8008	37.9086	33.9337	6.81463	5.13313	9.50575		179	29.2806	35.3545	31.2126
180	31.126	26.7777	24.1549	22.2486	23.6662	42.9029	49.0267	41.4669	37.0019	42.3334	30.1132	19.0988	10.7988	4.82074	5.55702	17.4856	9.01165	3.40597	4.52049	3.59744	7.74268	17.5294	14.3012	7.3762	21.6988	19.9785	16.7035	18.3158	29.046	34.3424	24.2698	19.1794	8.05787	11.28	5.37712	1.7048	0.334732	6.15462	36.9729	38.0357	34.1579	6.79085	5.14667	9.41142		180	29.3003	35.2762	31.2819
181	31.075	26.7091	24.1245	22.136	23.5563	42.8037	48.9619	41.4386	37.0681	42.4302	30.2007	19.1428	10.8251	4.85514	5.60456	17.5649	8.96824	3.38758	4.46462	3.58379	7.66591	17.5566	14.3013	7.35204	21.633	19.9215	16.6116	18.232	29.0191	34.269	24.1471	19.0562	7.92001	11.2284	5.33938	1.72598	0.325847	6.18809	37.1378	38.1579	34.3806	6.76721	5.15888	9.31682		181	29.3218	35.1952	31.3508
182	31.0261	26.6436	24.0982	22.0298	23.451	42.7059	48.8985	41.4081	37.1274	42.5251	30.2878	19.1821	10.8486	4.89067	5.64987	17.6385	8.92535	3.37051	4.40895	3.56978	7.59188	17.5847	14.3042	7.33023	21.5685	19.8676	16.5229	18.1507	28.9922	34.1946	24.0271	18.9336	7.78395	11.1791	5.29931	1.74652	0.318005	6.22327	37.2954	38.275	34.602	6.74375	5.16971	9.22207		182	29.3448	35.1116	31.4191
183	30.9793	26.5809	24.0759	21.9299	23.3505	42.6095	48.8363	41.3757	37.18	42.6182	30.3743	19.2165	10.8692	4.92717	5.69292	17.7065	8.88296	3.35471	4.35357	3.55542	7.52066	17.6136	14.31	7.31073	21.5052	19.8171	16.4375	18.072	28.9654	34.119	23.9095	18.8115	7.6497	11.1318	5.25693	1.76636	0.311205	6.25998	37.4459	38.387	34.822	6.72049	5.17915	9.1273		183	29.3691	35.0256	31.4864
184	30.9346	26.5211	24.0574	21.8365	23.2546	42.5143	48.7751	41.3411	37.2258	42.7097	30.4602	19.2463	10.8866	4.96451	5.73369	17.7688	8.84105	3.34013	4.29853	3.54069	7.45231	17.643	14.3184	7.29349	21.443	19.7701	16.3553	17.9961	28.9387	34.0426	23.7943	18.69	7.51726	11.0864	5.21227	1.78543	0.30545	6.29806	37.5894	38.4939	35.0409	6.69747	5.18715	9.03263		184	29.3946	34.9372	31.5521
185	30.8919	26.4641	24.0425	21.7494	23.1633	42.4202	48.7148	41.3047	37.2651	42.7996	30.5455	19.2714	10.9009	5.00251	5.77216	17.8256	8.7996	3.32672	4.24391	3.5256	7.38691	17.673	14.3296	7.27842	21.382	19.7267	16.2764	17.923	28.912	33.9654	23.6815	18.5692	7.38666	11.0429	5.16535	1.80368	0.300739	6.33736	37.7259	38.5954	35.2587	6.6747	5.1937	8.93817		185	29.4212	34.8466	31.616
186	30.8512	26.4099	24.031	21.6688	23.0765	42.327	48.6552	41.2662	37.298	42.888	30.6302	19.2918	10.9118	5.04103	5.80832	17.8769	8.75861	3.31444	4.18978	3.51016	7.3245	17.7034	14.3433	7.26547	21.3222	19.687	16.2007	17.8528	28.8855	33.8875	23.5709	18.4491	7.25793	11.0012	5.11623	1.82106	0.297075	6.37773	37.8556	38.6916	35.4753	6.65222	5.19877	8.84404		186	29.4486	34.7539	31.6778
187	30.8125	26.3584	24.0227	21.5946	22.9942	42.2349	48.5962	41.226	37.3245	42.9749	30.7141	19.3077	10.9194	5.07989	5.84217	17.9226	8.71804	3.30322	4.13619	3.49436	7.26514	17.7341	14.3597	7.25456	21.2635	19.6511	16.1284	17.7857	28.8592	33.8091	23.4625	18.3297	7.13111	10.961	5.06495	1.83751	0.294456	6.41902	37.9786	38.7823	35.6909	6.63002	5.20237	8.75034		187	29.4767	34.6592	31.737
188	30.7756	26.3096	24.0176	21.5268	22.9161	42.1435	48.5377	41.184	37.3449	43.0605	30.7972	19.3192	10.9235	5.11893	5.87369	17.963	8.67789	3.29303	4.08321	3.47821	7.20886	17.765	14.3786	7.24561	21.206	19.6192	16.0594	17.7216	28.833	33.7303	23.3562	18.2111	7.00623	10.9225	5.01158	1.85298	0.292884	6.4611	38.095	38.8674	35.9055	6.60814	5.20448	8.65718		188	29.5053	34.5627	31.7933
189	30.7407	26.2634	24.0153	21.4654	22.8424	42.0528	48.4794	41.1404	37.3592	43.1447	30.8794	19.3262	10.9241	5.15797	5.90289	17.998	8.63814	3.28382	4.0309	3.46171	7.1557	17.796	14.3999	7.23854	21.1497	19.5914	15.9938	17.6608	28.8069	33.6513	23.2519	18.0933	6.88334	10.8853	4.95619	1.86743	0.292358	6.50384	38.205	38.9468	36.1191	6.58657	5.2051	8.56465		189	29.5344	34.4645	31.8464
190	30.7076	26.22	24.0157	21.4103	22.7728	41.9628	48.4213	41.0953	37.3677	43.2277	30.9607	19.3289	10.921	5.19685	5.92978	18.0278	8.59878	3.27552	3.97932	3.44486	7.1057	17.827	14.4237	7.23326	21.0946	19.5677	15.9315	17.6031	28.7812	33.5722	23.1497	17.9765	6.76249	10.8496	4.89884	1.88083	0.292879	6.54712	38.3088	39.0205	36.3316	6.56531	5.20423	8.47284		190	29.5639	34.3647	31.8961
191	30.6763	26.1791	24.0186	21.3615	22.7074	41.8733	48.3631	41.0487	37.3704	43.3094	31.041	19.3274	10.9143	5.23539	5.95435	18.0524	8.5598	3.2681	3.92852	3.42768	7.05887	17.8578	14.4499	7.22968	21.0408	19.5483	15.8726	17.5488	28.7557	33.4931	23.0493	17.8607	6.64374	10.8151	4.83963	1.89312	0.294445	6.59081	38.4064	39.0882	36.5431	6.54438	5.20189	8.38186		191	29.5935	34.2635	31.9421
192	30.6467	26.1408	24.0238	21.3189	22.646	41.7843	48.3048	41.0009	37.3676	43.39	31.1203	19.3218	10.9038	5.27341	5.97662	18.072	8.52118	3.26151	3.87855	3.41016	7.01522	17.8885	14.4783	7.2277	20.9882	19.5332	15.817	17.4978	28.7305	33.4142	22.9508	17.7459	6.52714	10.7818	4.77864	1.90429	0.297057	6.63482	38.498	39.15	36.7535	6.52375	5.19809	8.29176		192	29.6233	34.161	31.984
193	30.6189	26.1051	24.0313	21.2826	22.5886	41.6957	48.2463	40.952	37.3593	43.4695	31.1985	19.312	10.8896	5.31075	5.99661	18.0867	8.48293	3.2557	3.82946	3.39231	6.97477	17.9188	14.509	7.22724	20.937	19.5224	15.7648	17.4502	28.7056	33.3356	22.8541	17.6322	6.41275	10.7496	4.71597	1.91429	0.300714	6.67903	38.5839	39.2057	36.9629	6.50342	5.19285	8.20264		193	29.6532	34.0574	32.0218
194	30.5928	26.0719	24.0407	21.2523	22.535	41.6074	48.1874	40.9022	37.3459	43.5478	31.2754	19.2984	10.8715	5.34724	6.01434	18.0966	8.44503	3.25062	3.78129	3.37414	6.93751	17.9487	14.5419	7.22819	20.8872	19.516	15.7159	17.4061	28.6812	33.2575	22.7592	17.5197	6.30064	10.7185	4.65173	1.92311	0.305413	6.72336	38.6641	39.2552	37.171	6.48339	5.18619	8.11456		194	29.6831	33.9528	32.0551
195	30.5683	26.0412	24.0519	21.228	22.4851	41.5194	48.1281	40.8516	37.3274	43.6251	31.3512	19.2808	10.8497	5.3827	6.02981	18.1018	8.40749	3.24623	3.73409	3.35564	6.90344	17.9781	14.5769	7.23047	20.8388	19.5141	15.6704	17.3654	28.6572	33.1799	22.666	17.4084	6.19085	10.6883	4.58602	1.93073	0.311154	6.76771	38.7388	39.2985	37.378	6.46362	5.17815	8.02758		195	29.7129	33.8474	32.0838
196	30.5454	26.013	24.0647	21.2097	22.4389	41.4316	48.0681	40.8003	37.304	43.7012	31.4256	19.2595	10.824	5.41698	6.04306	18.1024	8.3703	3.24249	3.6879	3.33683	6.87254	18.0069	14.6139	7.23396	20.7919	19.5167	15.6283	17.3282	28.6336	33.103	22.5744	17.2984	6.08345	10.659	4.51895	1.93712	0.317934	6.812	38.8082	39.3354	37.5836	6.4441	5.16875	7.94177		196	29.7426	33.7412	32.1077
197	30.524	25.9872	24.0791	21.1972	22.3963	41.344	48.0075	40.7485	37.2759	43.7762	31.4986	19.2346	10.7944	5.44992	6.05412	18.0987	8.33347	3.23934	3.64274	3.31771	6.8448	18.035	14.6528	7.23858	20.7465	19.5238	15.5896	17.2944	28.6107	33.027	22.4845	17.1898	5.97851	10.6306	4.45066	1.94228	0.325749	6.85615	38.8726	39.3658	37.7878	6.4248	5.15803	7.85718		197	29.7722	33.6345	32.1266
198	30.5042	25.9639	24.0947	21.1904	22.3572	41.2564	47.9461	40.6965	37.2432	43.8502	31.5701	19.2061	10.7611	5.48136	6.063	18.0906	8.297	3.23675	3.59865	3.29828	6.82019	18.0623	14.6936	7.24423	20.7027	19.5353	15.5541	17.2642	28.5883	32.9519	22.3961	17.0826	5.87607	10.6029	4.38126	1.94619	0.334597	6.90008	38.932	39.3898	37.9905	6.40569	5.14604	7.77386		198	29.8016	33.5273	32.1405
199	30.4858	25.9429	24.1115	21.1892	22.3214	41.169	47.8839	40.6444	37.2061	43.923	31.6401	19.1742	10.7239	5.51115	6.06975	18.0784	8.26091	3.23468	3.55565	3.27854	6.79867	18.0888	14.7362	7.25081	20.6606	19.5514	15.5221	17.2374	28.5666	32.8779	22.3093	16.9769	5.7762	10.5759	4.31089	1.94885	0.344474	6.94375	38.9866	39.4072	38.1915	6.38675	5.13281	7.69186		199	29.8308	33.4199	32.1492
200	30.4688	25.9242	24.1293	21.1934	22.2889	41.0815	47.8209	40.5923	37.1649	43.9946	31.7084	19.1389	10.683	5.53915	6.0744	18.0623	8.2252	3.23309	3.51377	3.25851	6.78021	18.1144	14.7806	7.25822	20.6202	19.572	15.4933	17.2141	28.5457	32.8051	22.224	16.8728	5.67895	10.5496	4.23967	1.95026	0.355374	6.98707	39.0366	39.4179	38.3908	6.36793	5.1184	7.6112		200	29.8598	33.3122	32.1527
201	30.4532	25.9078	24.1479	21.2029	22.2596	40.9941	47.7569	40.5404	37.1196	44.065	31.775	19.1005	10.6383	5.56523	6.07698	18.0423	8.18988	3.23194	3.47303	3.23817	6.76476	18.1391	14.8266	7.26638	20.5815	19.5971	15.4679	17.1942	28.5255	32.7335	22.1402	16.7703	5.58437	10.5239	4.16775	1.95042	0.367291	7.03001	39.0821	39.422	38.5881	6.3492	5.10285	7.53192		201	29.8887	33.2046	32.1509
202	30.4388	25.8937	24.1673	21.2176	22.2333	40.9066	47.6919	40.4889	37.0704	44.1341	31.8399	19.0589	10.59	5.58926	6.07753	18.0187	8.15498	3.23119	3.43344	3.21755	6.75227	18.1626	14.8741	7.27519	20.5447	19.6266	15.4458	17.1776	28.5062	32.6633	22.0578	16.6694	5.49251	10.4988	4.09527	1.94934	0.380219	7.07251	39.1234	39.4193	38.7834	6.33051	5.08623	7.45406		202	29.9173	33.097	32.1437
203	30.4257	25.8817	24.1872	21.2373	22.2099	40.8191	47.6259	40.4381	37.0175	44.202	31.9028	19.0144	10.5381	5.61112	6.0761	17.9915	8.1205	3.23082	3.39502	3.19663	6.74268	18.1851	14.9231	7.28457	20.5097	19.6605	15.427	17.1644	28.4877	32.5946	21.9769	16.5702	5.40342	10.4741	4.02237	1.94704	0.394151	7.11452	39.1606	39.4099	38.9765	6.31183	5.06859	7.37764		203	29.9459	32.9896	32.1311
204	30.4137	25.8718	24.2076	21.2618	22.1894	40.7315	47.5589	40.3879	36.961	44.2684	31.9638	18.967	10.4826	5.6307	6.07272	17.961	8.08648	3.23079	3.35778	3.17542	6.73594	18.2064	14.9734	7.29444	20.4767	19.6987	15.4115	17.1545	28.4703	32.5274	21.8974	16.4727	5.31714	10.4499	3.94919	1.94352	0.409077	7.156	39.1938	39.3938	39.1672	6.29311	5.04998	7.30266		204	29.9742	32.8826	32.1132
205	30.4029	25.864	24.2282	21.2909	22.1715	40.6439	47.4909	40.3386	36.901	44.3334	32.0227	18.9168	10.4236	5.6479	6.06744	17.9273	8.05293	3.23106	3.32172	3.15392	6.73196	18.2265	15.0251	7.30471	20.4456	19.7413	15.3993	17.1478	28.4539	32.4618	21.8192	16.377	5.23371	10.4262	3.87588	1.93879	0.424988	7.19691	39.2232	39.3709	39.3553	6.2743	5.03048	7.22916		205	30.0025	32.776	32.09
206	30.393	25.8581	24.2491	21.3245	22.1563	40.5561	47.4219	40.2905	36.8378	44.3968	32.0794	18.864	10.3613	5.66263	6.06031	17.8906	8.01988	3.23161	3.28685	3.13214	6.7307	18.2453	15.078	7.31531	20.4166	19.788	15.3903	17.1443	28.4386	32.3979	21.7424	16.2832	5.15316	10.4028	3.80258	1.9329	0.441873	7.23723	39.249	39.3412	39.5406	6.25537	5.01015	7.15714		206	30.0308	32.6699	32.0614
207	30.3842	25.8542	24.27	21.3624	22.1435	40.4683	47.3518	40.2435	36.7714	44.4586	32.134	18.8088	10.2958	5.67481	6.05138	17.851	7.98735	3.23241	3.25317	3.11008	6.73205	18.2629	15.1319	7.32616	20.3896	19.8388	15.3846	17.1438	28.4245	32.3357	21.6669	16.1911	5.07552	10.3798	3.72944	1.92585	0.459718	7.27692	39.2712	39.3048	39.723	6.23626	4.98904	7.08661		207	30.059	32.5645	32.0276
208	30.3762	25.8521	24.2909	21.4043	22.133	40.3803	47.2808	40.1978	36.702	44.5187	32.1862	18.7511	10.2271	5.68436	6.0407	17.8087	7.95537	3.23344	3.22067	3.08773	6.73596	18.2791	15.1869	7.33721	20.3648	19.8937	15.382	17.1463	28.4116	32.2753	21.5927	16.101	5.00081	10.3571	3.6566	1.91767	0.478511	7.31594	39.2901	39.2618	39.9023	6.21693	4.96724	7.01757		208	30.0872	32.4599	31.9887
209	30.3691	25.8517	24.3117	21.4501	22.1248	40.2923	47.2089	40.1537	36.6297	44.577	32.2359	18.6912	10.1553	5.69123	6.02832	17.7639	7.92397	3.23467	3.18935	3.06511	6.74233	18.2939	15.2429	7.34839	20.3421	19.9526	15.3827	17.1516	28.4	32.2167	21.5198	16.0127	4.92906	10.3347	3.58421	1.90839	0.498237	7.35427	39.3057	39.2122	40.0783	6.19733	4.94481	6.95002		209	30.1155	32.3561	31.9447
210	30.3628	25.8529	24.3322	21.4995	22.1187	40.2042	47.136	40.1112	36.5546	44.6334	32.2832	18.6292	10.0807	5.69537	6.0143	17.7167	7.89317	3.23608	3.15921	3.04221	6.75108	18.3074	15.2996	7.35965	20.3216	20.0152	15.3866	17.1597	28.3898	32.1601	21.4482	15.9262	4.86028	10.3126	3.5124	1.89805	0.518877	7.39189	39.3181	39.156	40.2507	6.17742	4.92182	6.88395		210	30.1439	32.2533	31.8957
211	30.3572	25.8557	24.3524	21.5523	22.1145	40.1161	47.0624	40.0705	36.4768	44.6877	32.3279	18.5651	10.0033	5.69674	5.99869	17.6673	7.86302	3.23765	3.13024	3.01904	6.76211	18.3194	15.3572	7.37093	20.3033	20.0816	15.3936	17.1705	28.381	32.1053	21.3779	15.8417	4.79448	10.2907	3.44131	1.88668	0.540414	7.42877	39.3276	39.0933	40.4193	6.15715	4.89834	6.81937		211	30.1725	32.1514	31.8419
212	30.3522	25.8599	24.3722	21.6082	22.1122	40.0279	46.9879	40.0316	36.3964	44.74	32.3698	18.4992	9.92329	5.69532	5.98154	17.6159	7.83353	3.23935	3.10242	2.9956	6.77534	18.3301	15.4154	7.3822	20.2872	20.1516	15.4037	17.1837	28.3737	32.0524	21.3088	15.7591	4.73167	10.269	3.37108	1.87432	0.562829	7.46489	39.3341	39.0244	40.584	6.13649	4.87445	6.75627		212	30.2013	32.0507	31.7834
213	30.3478	25.8654	24.3916	21.6672	22.1116	39.9396	46.9128	39.9947	36.3135	44.79	32.409	18.4315	9.8408	5.69108	5.96293	17.5626	7.80475	3.24118	3.07574	2.97188	6.79066	18.3393	15.4742	7.39341	20.2733	20.225	15.4169	17.1994	28.368	32.0014	21.2409	15.6783	4.67184	10.2475	3.30183	1.861	0.586098	7.50022	39.3377	38.9491	40.7446	6.11539	4.85022	6.69462		213	30.2304	31.9511	31.7203
214	30.3439	25.8721	24.4104	21.7288	22.1126	39.8514	46.8371	39.9598	36.2282	44.8377	32.4454	18.3621	9.75599	5.68402	5.94291	17.5076	7.77669	3.24311	3.0502	2.94791	6.808	18.347	15.5334	7.40453	20.2617	20.3018	15.4331	17.2173	28.3639	31.9524	21.1742	15.5994	4.61499	10.2261	3.2337	1.84677	0.610198	7.53474	39.3386	38.8678	40.9008	6.09382	4.82572	6.63443		214	30.2598	31.8528	31.6529
215	30.3404	25.8799	24.4286	21.7929	22.115	39.7632	46.7608	39.9272	36.1406	44.883	32.4788	18.2912	9.66904	5.67416	5.92154	17.451	7.74939	3.24514	3.02576	2.92367	6.82723	18.3533	15.5931	7.41553	20.2523	20.3818	15.4524	17.2374	28.3615	31.9053	21.1087	15.5223	4.56111	10.2049	3.1668	1.83167	0.635104	7.56843	39.3368	38.7806	41.0524	6.07174	4.80102	6.57566		215	30.2896	31.7557	31.5813
216	30.3372	25.8887	24.4461	21.8592	22.1188	39.675	46.6842	39.8968	36.0507	44.9258	32.5092	18.219	9.5801	5.66151	5.89888	17.3931	7.72288	3.24724	3.00243	2.89918	6.84828	18.3582	15.6531	7.4264	20.2452	20.4648	15.4747	17.2594	28.3608	31.8601	21.0444	15.4471	4.51019	10.1837	3.10126	1.81574	0.660788	7.60125	39.3324	38.6876	41.1992	6.04913	4.7762	6.51831		216	30.3198	31.66	31.5057
217	30.3344	25.8984	24.4629	21.9274	22.1238	39.5868	46.6072	39.8687	35.9587	44.9659	32.5365	18.1454	9.48935	5.64609	5.87501	17.334	7.69719	3.24942	2.98018	2.87444	6.87104	18.3616	15.7134	7.43712	20.2403	20.5508	15.4999	17.2832	28.3618	31.8169	20.9813	15.3736	4.46221	10.1627	3.03717	1.79903	0.687222	7.63319	39.3255	38.589	41.3411	6.02595	4.75133	6.46236		217	30.3504	31.5657	31.4262
218	30.3318	25.9088	24.4789	21.9973	22.13	39.4988	46.5301	39.843	35.8644	45.0033	32.5607	18.0707	9.39698	5.62795	5.84998	17.2738	7.67234	3.25166	2.959	2.84946	6.89542	18.3636	15.7738	7.44768	20.2376	20.6395	15.528	17.3087	28.3648	31.7755	20.9194	15.3018	4.41713	10.1417	2.97465	1.78158	0.714372	7.6642	39.316	38.485	41.4778	6.00218	4.72648	6.40778		218	30.3816	31.4728	31.3431
219	30.3293	25.9197	24.4941	22.0687	22.137	39.4109	46.4529	39.8197	35.7681	45.0379	32.5816	17.9949	9.30315	5.60714	5.82387	17.2126	7.64836	3.25396	2.93886	2.82424	6.9213	18.3642	15.8343	7.45808	20.2371	20.7307	15.559	17.3358	28.3696	31.736	20.8586	15.2318	4.37494	10.1207	2.91378	1.76344	0.742207	7.69428	39.3041	38.3758	41.6092	5.97781	4.70173	6.35456		219	30.4132	31.3813	31.2566
220	30.327	25.9312	24.5085	22.1412	22.145	39.3232	46.3758	39.7989	35.6698	45.0696	32.5993	17.9183	9.20806	5.58372	5.79675	17.1508	7.62527	3.2563	2.91975	2.79879	6.94861	18.3633	15.8949	7.46833	20.2387	20.8244	15.5928	17.3641	28.3763	31.6983	20.799	15.1634	4.3356	10.0997	2.85467	1.74466	0.770691	7.72337	39.2898	38.2617	41.735	5.95282	4.67714	6.30266		220	30.4455	31.2913	31.1669
221	30.3247	25.943	24.522	22.2146	22.1537	39.2357	46.2989	39.7806	35.5694	45.0983	32.6137	17.8408	9.11189	5.55775	5.76867	17.0883	7.60309	3.2587	2.90165	2.77313	6.97724	18.3612	15.9554	7.47843	20.2425	20.9204	15.6293	17.3937	28.3851	31.6625	20.7405	15.0966	4.29907	10.0788	2.79739	1.72528	0.799786	7.75145	39.273	38.1428	41.855	5.9272	4.65277	6.25206		221	30.4783	31.2028	31.0743
222	30.3224	25.955	24.5345	22.2887	22.163	39.1484	46.2223	39.7649	35.467	45.1239	32.6246	17.7626	9.01484	5.52932	5.73973	17.0254	7.58184	3.26113	2.88454	2.74725	7.0071	18.3576	16.0157	7.4884	20.2483	21.0185	15.6686	17.4244	28.3958	31.6283	20.6831	15.0313	4.26531	10.0577	2.74201	1.70536	0.829453	7.77847	39.2539	38.0194	41.9691	5.90094	4.62871	6.20274		222	30.5117	31.1158	30.9788
223	30.32	25.967	24.5461	22.3632	22.1728	39.0614	46.1462	39.7518	35.3627	45.1464	32.6322	17.6839	8.91709	5.49852	5.70997	16.9622	7.56154	3.26362	2.8684	2.72118	7.03809	18.3528	16.0759	7.49826	20.2562	21.1185	15.7105	17.4559	28.4086	31.5959	20.6269	14.9675	4.23428	10.0366	2.68861	1.68494	0.859651	7.80441	39.2324	37.8918	42.0772	5.87404	4.60501	6.15467		223	30.5458	31.0303	30.8808
224	30.3174	25.9791	24.5568	22.4379	22.183	38.9747	46.0707	39.7412	35.2564	45.1656	32.6364	17.6047	8.81883	5.46544	5.67948	16.8988	7.54221	3.26615	2.85322	2.69493	7.07013	18.3466	16.1358	7.50804	20.266	21.2202	15.755	17.4881	28.4235	31.5652	20.5717	14.9052	4.20592	10.0154	2.63723	1.66407	0.890336	7.8292	39.2085	37.7601	42.179	5.84651	4.58174	6.10782		224	30.5804	30.9462	30.7805
225	30.3147	25.9909	24.5664	22.5124	22.1936	38.8883	45.9959	39.7332	35.1482	45.1817	32.6371	17.5251	8.72027	5.43018	5.64834	16.8355	7.52384	3.26873	2.83897	2.66851	7.10313	18.3392	16.1954	7.51776	20.2777	21.3235	15.8021	17.5208	28.4404	31.5361	20.5177	14.8441	4.18018	9.9941	2.58794	1.64279	0.921462	7.85282	39.1822	37.6248	42.2744	5.81835	4.55895	6.06217		225	30.6157	30.8636	30.6781
226	30.3117	26.0025	24.575	22.5865	22.2043	38.8024	45.9221	39.7278	35.0381	45.1944	32.6344	17.4453	8.62159	5.39287	5.6166	16.7723	7.50646	3.27137	2.82564	2.64194	7.13701	18.3306	16.2547	7.52746	20.2913	21.4283	15.8516	17.554	28.4596	31.5086	20.4648	14.7844	4.15701	9.97261	2.54076	1.62116	0.952983	7.87521	39.1534	37.486	42.3632	5.78959	4.53671	6.01767		226	30.6515	30.7825	30.5738
227	30.3085	26.0136	24.5826	22.66	22.2152	38.7169	45.8493	39.7249	34.9261	45.2037	32.6282	17.3654	8.52298	5.35361	5.58436	16.7093	7.49006	3.27408	2.81322	2.61522	7.17168	18.3208	16.3136	7.53719	20.3066	21.5343	15.9036	17.5874	28.4808	31.4825	20.413	14.7258	4.13634	9.95094	2.49574	1.59922	0.984849	7.89633	39.1223	37.3441	42.4453	5.76023	4.51507	5.97431		227	30.688	30.7027	30.4679
228	30.3049	26.0242	24.5891	22.7326	22.226	38.6318	45.7777	39.7246	34.8121	45.2097	32.6185	17.2854	8.42465	5.31254	5.55167	16.6468	7.47465	3.27685	2.80169	2.58839	7.20707	18.3098	16.372	7.54698	20.3237	21.6413	15.9578	17.6208	28.5042	31.458	20.3623	14.6684	4.11812	9.92906	2.45289	1.57702	1.01701	7.91611	39.0887	37.1992	42.5206	5.7303	4.49408	5.93204		228	30.725	30.6243	30.3606
229	30.3009	26.0342	24.5945	22.8041	22.2368	38.5473	45.7074	39.7268	34.6962	45.2123	32.6054	17.2055	8.32677	5.26978	5.51862	16.5848	7.46022	3.27971	2.79102	2.56146	7.2431	18.2978	16.43	7.55687	20.3424	21.7493	16.0144	17.6542	28.5298	31.4349	20.3127	14.612	4.10229	9.90692	2.41223	1.5546	1.04941	7.9345	39.0526	37.0518	42.589	5.69983	4.4738	5.89084		229	30.7625	30.5473	30.252
230	30.2965	26.0435	24.5988	22.8743	22.2475	38.4633	45.6386	39.7315	34.5783	45.2114	32.5889	17.1258	8.22953	5.22548	5.48527	16.5235	7.44677	3.28267	2.78121	2.53445	7.2797	18.2847	16.4874	7.56693	20.3627	21.858	16.0731	17.6874	28.5576	31.4131	20.2643	14.5566	4.08877	9.88451	2.37377	1.53201	1.082	7.95144	39.014	36.902	42.6503	5.66886	4.45427	5.85068		230	30.8004	30.4715	30.1424
231	30.2916	26.0519	24.602	22.9428	22.2579	38.38	45.5713	39.7386	34.4585	45.2071	32.5691	17.0464	8.13312	5.17976	5.45171	16.463	7.43428	3.28573	2.77225	2.50739	7.3168	18.2705	16.5442	7.5772	20.3844	21.9672	16.134	17.7202	28.5875	31.3926	20.2169	14.5021	4.07749	9.86178	2.3375	1.5093	1.11473	7.96688	38.9728	36.7502	42.7045	5.63741	4.43553	5.81152		231	30.8388	30.3969	30.032
232	30.2862	26.0593	24.604	23.0096	22.268	38.2972	45.5058	39.7481	34.3368	45.1993	32.5459	16.9673	8.03773	5.13279	5.418	16.4034	7.42276	3.28891	2.76411	2.48028	7.35435	18.2555	16.6005	7.58774	20.4076	22.0768	16.1969	17.7526	28.6195	31.3734	20.1706	14.4484	4.0684	9.83871	2.30341	1.4865	1.14753	7.98075	38.929	36.5967	42.7514	5.60552	4.41762	5.77332		232	30.8776	30.3234	29.921
233	30.2802	26.0658	24.6048	23.0744	22.2778	38.2152	45.4422	39.76	34.2131	45.1881	32.5195	16.8887	7.94352	5.08471	5.38421	16.3449	7.41218	3.29224	2.75679	2.45317	7.39229	18.2395	16.6562	7.59861	20.432	22.1867	16.2617	17.7843	28.6537	31.3555	20.1255	14.3956	4.06142	9.81526	2.27149	1.46366	1.18034	7.99299	38.8825	36.4416	42.7909	5.57325	4.40059	5.73606		233	30.9166	30.251	29.8096
234	30.2736	26.0711	24.6044	23.137	22.2872	38.1338	45.3805	39.7742	34.0874	45.1734	32.4898	16.8107	7.85068	5.03566	5.35042	16.2876	7.40252	3.29572	2.75028	2.42608	7.43055	18.2226	16.7113	7.60986	20.4577	22.2966	16.3285	17.8152	28.69	31.3386	20.0814	14.3434	4.05647	9.7914	2.24171	1.44081	1.21312	8.00354	38.8333	36.2854	42.8231	5.54064	4.38446	5.6997		234	30.9559	30.1796	29.6979
235	30.2664	26.0753	24.6027	23.1972	22.2961	38.0531	45.3209	39.7906	33.9597	45.1554	32.4571	16.7333	7.75937	4.9858	5.31671	16.2316	7.39376	3.29938	2.74456	2.39903	7.46909	18.205	16.7657	7.62155	20.4845	22.4064	16.397	17.8453	28.7284	31.3229	20.0385	14.2918	4.05349	9.76709	2.21402	1.41801	1.24579	8.01233	38.7814	36.1282	42.8479	5.50773	4.36926	5.66419		235	30.9953	30.1091	29.5862
236	30.2586	26.0782	24.5998	23.2549	22.3045	37.9733	45.2634	39.8092	33.83	45.1339	32.4213	16.6567	7.66976	4.93529	5.28313	16.1769	7.38588	3.30324	2.73962	2.37204	7.50786	18.1865	16.8195	7.63375	20.5124	22.5159	16.4673	17.8745	28.7688	31.3083	19.9966	14.2408	4.05241	9.74232	2.1884	1.39527	1.2783	8.0193	38.7266	35.9703	42.8651	5.47459	4.35501	5.62952		236	31.0348	30.0394	29.4745
237	30.25	26.0799	24.5955	23.3098	22.3123	37.8942	45.2083	39.8299	33.6983	45.1091	32.3827	16.5809	7.58201	4.88428	5.24976	16.1238	7.37885	3.30733	2.73546	2.34516	7.54683	18.1674	16.8726	7.64652	20.5412	22.6251	16.5392	17.9026	28.8113	31.2947	19.9559	14.1903	4.05315	9.71703	2.16479	1.37265	1.31059	8.02438	38.669	35.812	42.8748	5.44126	4.34174	5.59563		237	31.0742	29.9704	29.3632
238	30.2406	26.0802	24.5899	23.3618	22.3196	37.816	45.1555	39.8526	33.5646	45.081	32.3412	16.5059	7.49627	4.83293	5.21666	16.0724	7.37263	3.31165	2.73206	2.3184	7.58594	18.1476	16.9251	7.65991	20.571	22.7336	16.6126	17.9295	28.8557	31.2821	19.9163	14.1403	4.05564	9.69121	2.14313	1.35018	1.3426	8.02752	38.6085	35.6535	42.8769	5.40781	4.32946	5.56249		238	31.1136	29.9019	29.2522
239	30.2305	26.0792	24.5829	23.4107	22.3263	37.7386	45.1052	39.8773	33.4288	45.0497	32.297	16.432	7.41269	4.78139	5.1839	16.0226	7.36721	3.31625	2.72941	2.2918	7.62517	18.1272	16.9769	7.67398	20.6016	22.8415	16.6876	17.9551	28.9019	31.2705	19.8778	14.0906	4.05981	9.66481	2.12337	1.32788	1.37425	8.02865	38.545	35.495	42.8715	5.3743	4.31818	5.53007		239	31.1526	29.834	29.1417
240	30.2195	26.0768	24.5744	23.4565	22.3323	37.6621	45.0573	39.9038	33.2909	45.0151	32.2503	16.3592	7.33141	4.72981	5.15155	15.9747	7.36253	3.32114	2.72751	2.26538	7.66449	18.1062	17.0282	7.6888	20.6329	22.9484	16.7639	17.9795	28.9501	31.2598	19.8405	14.0413	4.06559	9.63783	2.10543	1.3058	1.4055	8.0277	38.4785	35.3367	42.8585	5.34077	4.30791	5.49833		240	31.1914	29.7664	29.0319
241	30.2077	26.0729	24.5645	23.499	22.3377	37.5865	45.0121	39.9322	33.151	44.9773	32.2011	16.2874	7.25256	4.67834	5.11967	15.9287	7.35857	3.32636	2.72635	2.23919	7.70386	18.0848	17.0787	7.70442	20.6648	23.0544	16.8415	18.0025	28.9999	31.25	19.8042	13.9924	4.07291	9.61022	2.08925	1.28396	1.43627	8.02464	38.4089	35.179	42.838	5.3073	4.29866	5.46723		241	31.2297	29.6991	28.9228
242	30.1949	26.0676	24.5529	23.538	22.3424	37.5118	44.9695	39.9622	33.0091	44.9365	32.1496	16.2169	7.17627	4.62715	5.08831	15.8847	7.35527	3.33192	2.72592	2.21324	7.74326	18.0629	17.1287	7.7209	20.6974	23.1593	16.9203	18.0241	29.0515	31.2411	19.7691	13.9437	4.08171	9.58197	2.07473	1.26239	1.46652	8.0194	38.3363	35.0218	42.8099	5.27395	4.29042	5.43673		242	31.2674	29.632	28.8146
243	30.1812	26.0608	24.5397	23.5736	22.3465	37.4381	44.9296	39.9939	32.8651	44.8926	32.096	16.1477	7.10266	4.57636	5.05753	15.8429	7.35261	3.33786	2.72621	2.18758	7.78267	18.0406	17.1781	7.73828	20.7304	23.2628	17.0003	18.0443	29.1046	31.2331	19.7352	13.8952	4.09192	9.55305	2.06181	1.24112	1.49617	8.01192	38.2605	34.8655	42.7743	5.24077	4.28318	5.4068		243	31.3044	29.5648	28.7074
244	30.1665	26.0527	24.5249	23.6056	22.3499	37.3653	44.8923	40.0271	32.7191	44.8458	32.0405	16.0798	7.03185	4.52614	5.02739	15.8032	7.35054	3.34421	2.72721	2.16222	7.82206	18.0179	17.2269	7.75662	20.7639	23.365	17.0814	18.0629	29.1593	31.226	19.7023	13.847	4.10347	9.52344	2.05038	1.22017	1.52516	8.00218	38.1816	34.7102	42.7313	5.20783	4.27694	5.3774		244	31.3407	29.4975	28.6011
245	30.1507	26.043	24.5083	23.634	22.3527	37.2935	44.8578	40.0617	32.5711	44.796	31.983	16.0134	6.96393	4.47661	4.99795	15.7658	7.34902	3.35099	2.72891	2.13721	7.86143	17.9949	17.2752	7.77597	20.7978	23.4656	17.1634	18.08	29.2154	31.2197	19.6706	13.7991	4.11631	9.49313	2.04037	1.19957	1.55345	7.99011	38.0995	34.556	42.6809	5.17518	4.27167	5.3485		245	31.376	29.43	28.496
246	30.1338	26.032	24.4898	23.6587	22.3549	37.2226	44.826	40.0977	32.421	44.7434	31.924	15.9484	6.899	4.42791	4.96925	15.7308	7.34799	3.35824	2.73131	2.11258	7.90076	17.9717	17.3229	7.79636	20.832	23.5646	17.2463	18.0957	29.2728	31.2142	19.64	13.7513	4.13037	9.4621	2.03167	1.17934	1.58097	7.9757	38.0141	34.4031	42.6231	5.14288	4.26737	5.32005		246	31.4103	29.3622	28.392
247	30.1158	26.0195	24.4695	23.6797	22.3565	37.1528	44.7969	40.1349	32.269	44.688	31.8634	15.8849	6.83716	4.38018	4.94134	15.6982	7.34742	3.36598	2.73439	2.08835	7.94002	17.9483	17.3702	7.81783	20.8665	23.6619	17.3301	18.1098	29.3314	31.2096	19.6105	13.7037	4.14561	9.43035	2.0242	1.15951	1.60767	7.95891	37.9256	34.2515	42.558	5.111	4.26401	5.29203		247	31.4435	29.2938	28.2892
248	30.0966	26.0057	24.4472	23.6969	22.3575	37.0839	44.7706	40.1732	32.115	44.63	31.8016	15.823	6.77847	4.33353	4.91426	15.6682	7.34726	3.37425	2.73815	2.06455	7.97921	17.9247	17.4169	7.84043	20.9011	23.7572	17.4146	18.1224	29.391	31.2059	19.582	13.6563	4.16196	9.39785	2.01785	1.14008	1.63349	7.93971	37.8338	34.1015	42.4858	5.07958	4.26155	5.2644		248	31.4754	29.2249	28.1877
249	30.0761	25.9906	24.4228	23.7104	22.3579	37.0161	44.7469	40.2126	31.9591	44.5693	31.7386	15.7628	6.72302	4.28809	4.88806	15.6407	7.34747	3.38307	2.74257	2.04122	8.01832	17.901	17.4633	7.86417	20.936	23.8506	17.4998	18.1335	29.4516	31.203	19.5547	13.6092	4.17937	9.36462	2.01251	1.12109	1.65838	7.91809	37.7389	33.953	42.4065	5.04867	4.25997	5.23713		249	31.506	29.1551	28.0873
250	30.0542	25.9741	24.3963	23.7202	22.3579	36.9492	44.7258	40.253	31.8014	44.5061	31.6746	15.7042	6.67085	4.24398	4.86278	15.6158	7.34799	3.39247	2.74764	2.01838	8.05734	17.8772	17.5092	7.88909	20.9709	23.9419	17.5855	18.1432	29.5131	31.201	19.5285	13.5623	4.1978	9.33064	2.0081	1.10254	1.6823	7.89403	37.6407	33.8062	42.3201	5.01833	4.25923	5.21018		250	31.535	29.0846	27.9882
251	30.031	25.9564	24.3676	23.7262	22.3573	36.8834	44.7073	40.2942	31.6418	44.4404	31.6099	15.6474	6.62203	4.20129	4.83845	15.5936	7.34878	3.40249	2.75336	1.99606	8.09625	17.8534	17.5548	7.9152	21.0059	24.0311	17.6719	18.1515	29.5753	31.1999	19.5033	13.5156	4.2172	9.29593	2.00451	1.08445	1.70519	7.86754	37.5393	33.6611	42.227	4.98859	4.2593	5.18354		251	31.5625	29.013	27.8904
252	30.0063	25.9374	24.3365	23.7286	22.3564	36.8185	44.6913	40.3361	31.4805	44.3722	31.5446	15.5923	6.57661	4.16014	4.81511	15.5742	7.34981	3.41314	2.7597	1.97429	8.13504	17.8297	17.6	7.94252	21.041	24.1179	17.7586	18.1585	29.638	31.1997	19.4792	13.4693	4.23754	9.26049	2.00164	1.06684	1.72701	7.83862	37.4348	33.5177	42.1271	4.95951	4.26012	5.15716		252	31.5883	28.9403	27.7938
253	29.98	25.9173	24.3031	23.7273	22.355	36.7546	44.6778	40.3787	31.3175	44.3018	31.4788	15.5391	6.5346	4.12061	4.79277	15.5576	7.35102	3.42446	2.76666	1.95308	8.17371	17.8059	17.6449	7.97106	21.076	24.2025	17.8458	18.1642	29.7012	31.2004	19.4561	13.4233	4.25876	9.22433	1.99939	1.04972	1.74772	7.80728	37.3271	33.3761	42.0205	4.93112	4.26166	5.13103		253	31.6124	28.8664	27.6984
254	29.9521	25.896	24.2672	23.7225	22.3533	36.6917	44.6667	40.4218	31.1528	44.2291	31.4128	15.4877	6.49605	4.08279	4.77148	15.5438	7.35238	3.43648	2.77421	1.93247	8.21223	17.7823	17.6895	8.00082	21.1111	24.2845	17.9333	18.1686	29.7646	31.2021	19.4339	13.3777	4.28084	9.18746	1.99765	1.03309	1.76729	7.77354	37.2163	33.2364	41.9075	4.90346	4.26385	5.10513		254	31.6345	28.7912	27.6043
255	29.9226	25.8737	24.2288	23.7142	22.3514	36.6298	44.6578	40.4653	30.9866	44.1541	31.3468	15.4383	6.46097	4.04677	4.75125	15.5329	7.35384	3.44921	2.78235	1.91248	8.2506	17.7588	17.7338	8.0318	21.146	24.3641	18.0211	18.172	29.8282	31.2047	19.4128	13.3326	4.30374	9.14991	1.99633	1.01697	1.78567	7.73743	37.1025	33.0984	41.7881	4.87656	4.26666	5.07942		255	31.6548	28.7145	27.5113
256	29.8912	25.8503	24.1877	23.7024	22.3492	36.5689	44.6511	40.5092	30.819	44.077	31.2808	15.3907	6.42937	4.0126	4.7321	15.525	7.35537	3.46269	2.79105	1.89312	8.28881	17.7354	17.778	8.06399	21.181	24.4411	18.1091	18.1743	29.8917	31.2084	19.3926	13.2879	4.32743	9.1117	1.99534	1.00137	1.80284	7.699	36.9857	32.9622	41.6626	4.85044	4.27001	5.05391		256	31.673	28.6363	27.4194
257	29.858	25.8258	24.144	23.6874	22.3469	36.5089	44.6465	40.5533	30.65	43.9978	31.2151	15.3452	6.40126	3.98037	4.71404	15.52	7.35692	3.47693	2.8003	1.87441	8.32682	17.7122	17.8219	8.09737	21.2158	24.5154	18.1972	18.1756	29.9551	31.2131	19.3732	13.2438	4.35189	9.07285	1.99458	0.986284	1.81878	7.65828	36.866	32.8277	41.531	4.82512	4.27386	5.02856		257	31.6891	28.5564	27.3285
258	29.8229	25.8005	24.0974	23.6691	22.3444	36.4498	44.6438	40.5975	30.4797	43.9166	31.1498	15.3016	6.37661	3.95012	4.69709	15.518	7.35848	3.49195	2.81008	1.85637	8.36464	17.6892	17.8656	8.13193	21.2505	24.587	18.2854	18.1762	30.0182	31.2188	19.3548	13.2003	4.37709	9.0334	1.99395	0.971733	1.83345	7.61533	36.7434	32.695	41.3936	4.80064	4.27814	5.00337		258	31.703	28.4748	27.2387
259	29.7857	25.7742	24.048	23.6478	22.342	36.3917	44.6429	40.6418	30.3083	43.8334	31.0851	15.26	6.35543	3.9219	4.68126	15.519	7.35999	3.50778	2.82035	1.83901	8.40223	17.6665	17.9092	8.16763	21.2851	24.6558	18.3737	18.176	30.0807	31.2257	19.3372	13.1576	4.40301	8.99338	1.99337	0.957716	1.84685	7.57022	36.618	32.564	41.2505	4.777	4.2828	4.97834		259	31.7148	28.3915	27.1498
260	29.7463	25.747	23.9957	23.6235	22.3395	36.3345	44.6437	40.6859	30.1358	43.7483	31.021	15.2205	6.33768	3.89575	4.66656	15.523	7.36144	3.52443	2.83111	1.82235	8.43957	17.6441	17.9526	8.20445	21.3195	24.7218	18.4619	18.1751	30.1427	31.2336	19.3203	13.1156	4.42963	8.95283	1.99275	0.944237	1.85895	7.52303	36.49	32.4347	41.1019	4.7542	4.28775	4.95345		260	31.7244	28.3062	27.0618
261	29.7047	25.719	23.9403	23.5964	22.3372	36.2782	44.6461	40.7299	29.9624	43.6612	30.9579	15.1831	6.32334	3.87171	4.65297	15.5301	7.36279	3.54191	2.84233	1.80639	8.47665	17.6219	17.9959	8.24235	21.3539	24.785	18.5501	18.1738	30.2038	31.2428	19.3042	13.0745	4.45694	8.91179	1.99202	0.931299	1.86975	7.47383	36.3594	32.307	40.9479	4.73227	4.29295	4.9287		261	31.7316	28.219	26.9747
262	29.6608	25.6902	23.8819	23.5666	22.335	36.2228	44.6499	40.7736	29.7883	43.5723	30.8957	15.1477	6.31236	3.84979	4.64051	15.5402	7.36403	3.56024	2.85397	1.79115	8.51342	17.6001	18.0391	8.28128	21.388	24.8451	18.6382	18.1721	30.264	31.2531	19.2887	13.0344	4.48491	8.8703	1.99109	0.918905	1.87925	7.42271	36.2263	32.1808	40.7889	4.71119	4.29831	4.90411		262	31.7366	28.1298	26.8882
263	29.6144	25.6605	23.8205	23.5343	22.3331	36.1682	44.6549	40.8169	29.6135	43.4816	30.8346	15.1144	6.3047	3.83001	4.62917	15.5533	7.36513	3.57944	2.86602	1.77662	8.54986	17.5785	18.0821	8.3212	21.4221	24.9024	18.7261	18.1702	30.3231	31.2646	19.2739	12.9953	4.51354	8.82841	1.9899	0.907055	1.88743	7.36977	36.0908	32.056	40.6248	4.69097	4.30378	4.87967		263	31.7393	28.0386	26.8025
264	29.5655	25.6301	23.7558	23.4997	22.3314	36.1146	44.6611	40.8597	29.4382	43.3891	30.7747	15.0832	6.30031	3.81238	4.61893	15.5695	7.36607	3.5995	2.87844	1.7628	8.58594	17.5574	18.125	8.36205	21.456	24.9566	18.8137	18.1682	30.381	31.2774	19.2597	12.9574	4.54282	8.78617	1.98836	0.89575	1.89432	7.31513	35.953	31.9327	40.456	4.6716	4.30928	4.8554		264	31.7396	27.9453	26.7173
265	29.5139	25.5989	23.688	23.4628	22.3301	36.0617	44.6681	40.9019	29.2625	43.2948	30.7161	15.0542	6.29913	3.7969	4.6098	15.5887	7.36684	3.62043	2.8912	1.74971	8.62161	17.5365	18.1678	8.40376	21.4897	25.0077	18.9011	18.1661	30.4374	31.2914	19.246	12.9207	4.57273	8.74364	1.98643	0.884991	1.89992	7.25888	35.813	31.8107	40.2826	4.65307	4.31474	4.83132		265	31.7377	27.85	26.6326
266	29.4596	25.5669	23.617	23.4239	22.3292	36.0098	44.676	40.9434	29.0866	43.1988	30.6589	15.0273	6.30108	3.78356	4.60174	15.6109	7.36744	3.64224	2.90427	1.73734	8.65684	17.5161	18.2105	8.44629	21.5233	25.0558	18.9882	18.1643	30.4923	31.3067	19.2327	12.8853	4.60327	8.70086	1.98404	0.874776	1.90424	7.20117	35.671	31.69	40.1049	4.63537	4.3201	4.80743		266	31.7335	27.7525	26.5484
267	29.4025	25.5342	23.5427	23.3831	22.3289	35.9587	44.6845	40.9842	28.9108	43.101	30.6032	15.0025	6.30611	3.77234	4.59476	15.6361	7.36784	3.66492	2.91763	1.72568	8.69159	17.496	18.253	8.48954	21.5567	25.1009	19.0749	18.1627	30.5454	31.3233	19.2198	12.8513	4.63443	8.6579	1.98113	0.865103	1.90731	7.14211	35.5271	31.5705	39.923	4.61847	4.32528	4.78377		267	31.727	27.6529	26.4646
268	29.3423	25.5006	23.4652	23.3407	22.329	35.9084	44.6935	41.0241	28.735	43.0016	30.549	14.9798	6.31413	3.76321	4.58881	15.6643	7.36804	3.68848	2.93122	1.71472	8.72581	17.4764	18.2954	8.53346	21.59	25.1428	19.1612	18.1616	30.5968	31.3412	19.2073	12.8188	4.6662	8.61481	1.97765	0.855972	1.90915	7.08184	35.3814	31.452	39.7372	4.60236	4.33023	4.76036		268	31.7183	27.5512	26.381
269	29.2792	25.4663	23.3845	23.2967	22.3298	35.8589	44.7028	41.0629	28.5596	42.9004	30.4964	14.9593	6.32506	3.75614	4.58389	15.6953	7.36805	3.71291	2.94503	1.70446	8.75946	17.4571	18.3376	8.57796	21.6232	25.1815	19.2471	18.161	30.6461	31.3604	19.195	12.788	4.69857	8.57166	1.97357	0.847379	1.90979	7.02051	35.234	31.3347	39.5476	4.58701	4.33486	4.73723		269	31.7074	27.4474	26.2977
270	29.2129	25.4311	23.3004	23.2514	22.3313	35.8103	44.7122	41.1007	28.3846	42.7976	30.4455	14.9409	6.33881	3.75109	4.57997	15.7293	7.36786	3.73821	2.959	1.69489	8.79247	17.4382	18.3796	8.62297	21.6561	25.2172	19.3324	18.1611	30.6934	31.381	19.1829	12.7588	4.73154	8.52849	1.96884	0.839322	1.90927	6.95826	35.085	31.2183	39.3545	4.5724	4.33911	4.71442		270	31.6943	27.3415	26.2145
271	29.1434	25.395	23.2132	23.205	22.3335	35.7624	44.7216	41.1374	28.2103	42.693	30.3962	14.9246	6.3553	3.74802	4.57701	15.7661	7.36748	3.76435	2.97311	1.68599	8.82481	17.4196	18.4214	8.66839	21.6889	25.2496	19.4172	18.1621	30.7384	31.4029	19.1709	12.7315	4.7651	8.48538	1.96343	0.831797	1.90764	6.89524	34.9346	31.1028	39.1581	4.55849	4.34292	4.69197		271	31.6792	27.2337	26.1314
272	29.0705	25.358	23.1227	23.1575	22.3365	35.7154	44.7309	41.1728	28.0369	42.5868	30.3486	14.9104	6.37442	3.74687	4.57499	15.8057	7.36692	3.79133	2.98732	1.67775	8.85641	17.4015	18.4629	8.71415	21.7216	25.279	19.5013	18.164	30.7811	31.4261	19.159	12.7061	4.79924	8.44239	1.95731	0.824803	1.90494	6.83161	34.7829	30.9881	38.9585	4.54526	4.34623	4.66992		272	31.662	27.1238	26.0483
273	28.9942	25.3201	23.0291	23.1093	22.3403	35.6692	44.7398	41.2068	27.8645	42.4789	30.3027	14.8983	6.39607	3.74757	4.57386	15.8479	7.36618	3.81914	3.00158	1.67015	8.88721	17.3838	18.5041	8.76014	21.7541	25.3052	19.5848	18.167	30.8213	31.4506	19.1471	12.6826	4.83395	8.39957	1.95045	0.818334	1.90122	6.76754	34.63	30.8743	38.7561	4.53266	4.34898	4.64831		273	31.643	27.0121	25.9652
274	28.9144	25.2811	22.9323	23.0605	22.345	35.6238	44.7483	41.2394	27.6933	42.3693	30.2585	14.8883	6.42016	3.75006	4.57361	15.8929	7.36529	3.84775	3.01585	1.66318	8.91716	17.3664	18.545	8.80629	21.7864	25.3282	19.6675	18.1711	30.8589	31.4764	19.1351	12.6611	4.86922	8.357	1.94284	0.812388	1.89655	6.70318	34.476	30.7612	38.5509	4.52067	4.3511	4.6272		274	31.622	26.8986	25.882
275	28.8311	25.241	22.8324	23.0112	22.3506	35.5793	44.7561	41.2704	27.5236	42.258	30.2159	14.8803	6.44658	3.75427	4.57418	15.9404	7.36425	3.87714	3.0301	1.6568	8.9462	17.3494	18.5854	8.85249	21.8185	25.3481	19.7495	18.1766	30.8939	31.5034	19.123	12.6419	4.90504	8.31472	1.93447	0.80696	1.89098	6.63871	34.3211	30.6488	38.3433	4.50924	4.35255	4.60664		275	31.5993	26.7834	25.7988
276	28.7441	25.1997	22.7295	22.9616	22.3571	35.5356	44.7633	41.2998	27.3554	42.145	30.175	14.8743	6.47522	3.76011	4.57554	15.9903	7.36309	3.90729	3.04428	1.65101	8.97426	17.3327	18.6254	8.89865	21.8504	25.3649	19.8307	18.1835	30.9261	31.5317	19.1106	12.6248	4.94139	8.2728	1.92532	0.802046	1.88459	6.5743	34.1653	30.5371	38.1334	4.49834	4.35327	4.58667		276	31.5749	26.6665	25.7153
277	28.6535	25.1572	22.6237	22.9119	22.3647	35.4927	44.7695	41.3275	27.1891	42.0303	30.1357	14.8703	6.50598	3.76749	4.57764	16.0427	7.36183	3.93818	3.05835	1.64577	9.00129	17.3164	18.665	8.94468	21.8821	25.3785	19.911	18.1919	30.9555	31.5613	19.0981	12.61	4.97826	8.2313	1.91539	0.797643	1.87745	6.51012	34.0089	30.426	37.9215	4.48793	4.35321	4.56736		277	31.5489	26.5481	25.6317
278	28.5591	25.1133	22.515	22.8622	22.3732	35.4507	44.7747	41.3534	27.0247	41.9138	30.098	14.8683	6.53873	3.77634	4.58044	16.0974	7.3605	3.96977	3.07227	1.64106	9.02721	17.3004	18.7039	8.99049	21.9136	25.3891	19.9903	18.2019	30.982	31.5919	19.0852	12.5976	5.01562	8.19028	1.90467	0.793747	1.86963	6.44634	33.8518	30.3155	37.7077	4.47797	4.35233	4.54877		278	31.5213	26.4284	25.5479
279	28.4609	25.068	22.4035	22.8128	22.3828	35.4095	44.7789	41.3774	26.8626	41.7956	30.0618	14.8682	6.57338	3.78654	4.5839	16.1544	7.35912	4.00204	3.08599	1.63685	9.05198	17.2847	18.7423	9.03597	21.9448	25.3966	20.0687	18.2136	31.0056	31.6237	19.0719	12.5876	5.05347	8.14978	1.89319	0.790353	1.86123	6.38313	33.6942	30.2056	37.4923	4.46841	4.35058	4.53095		279	31.4924	26.3074	25.4638
280	28.3589	25.0211	22.2893	22.7637	22.3934	35.3692	44.7817	41.3994	26.7028	41.6756	30.027	14.87	6.6098	3.798	4.58798	16.2134	7.35771	4.03494	3.09948	1.63313	9.07552	17.2693	18.78	9.08103	21.9758	25.4011	20.146	18.2271	31.0261	31.6565	19.0582	12.58	5.09176	8.10988	1.88093	0.787458	1.85234	6.32067	33.5361	30.0963	37.2755	4.45922	4.34793	4.51397		280	31.4623	26.1852	25.3796
281	28.253	24.9726	22.1726	22.7151	22.4051	35.3298	44.7833	41.4193	26.5456	41.5538	29.9935	14.8736	6.64789	3.81062	4.59261	16.2744	7.35632	4.06845	3.11268	1.62985	9.09777	17.2542	18.8169	9.12559	22.0064	25.4025	20.2221	18.2425	31.0436	31.6903	19.0439	12.575	5.13049	8.07061	1.86792	0.785058	1.84304	6.25914	33.3778	29.9876	37.0574	4.45036	4.34433	4.49789		281	31.4309	26.0621	25.295
282	28.1433	24.9224	22.0535	22.6671	22.4179	35.2914	44.7834	41.4371	26.3912	41.4302	29.9613	14.879	6.68753	3.82428	4.59775	16.3373	7.35497	4.10252	3.12557	1.627	9.11868	17.2393	18.8531	9.16954	22.0367	25.401	20.2971	18.2597	31.0581	31.7251	19.0292	12.5725	5.16961	8.03203	1.85417	0.78315	1.83343	6.1987	33.2191	29.8795	36.8384	4.44178	4.33977	4.48277		282	31.3984	25.9383	25.2103
283	28.0297	24.8702	21.9321	22.6199	22.4317	35.2538	44.7821	41.4526	26.2397	41.3049	29.9303	14.8861	6.72861	3.83888	4.60336	16.402	7.35371	4.13712	3.13809	1.62454	9.13818	17.2246	18.8884	9.21281	22.0667	25.3966	20.3709	18.279	31.0694	31.7606	19.0139	12.5727	5.20909	7.99419	1.8397	0.781729	1.82362	6.13952	33.0603	29.772	36.6186	4.43346	4.33421	4.46867		283	31.365	25.8137	25.1253
284	27.9122	24.8162	21.8084	22.5735	22.4465	35.2172	44.7791	41.4658	26.0914	41.1776	29.9003	14.8949	6.77103	3.85431	4.60938	16.4682	7.35255	4.17221	3.1502	1.62246	9.15622	17.2101	18.9228	9.2553	22.0963	25.3892	20.4433	18.3002	31.0776	31.797	18.998	12.5754	5.24891	7.95713	1.82454	0.780792	1.81372	6.08177	32.9015	29.6651	36.3983	4.42533	4.32763	4.45565		284	31.3307	25.6888	25.0401
285	27.791	24.76	21.6828	22.5282	22.4624	35.1815	44.7745	41.4766	25.9465	41.0485	29.8713	14.9053	6.81465	3.87044	4.61577	16.536	7.35155	4.20774	3.16187	1.62071	9.17275	17.1957	18.9561	9.29693	22.1255	25.3791	20.5144	18.3236	31.0827	31.8339	18.9814	12.5808	5.28901	7.92089	1.80871	0.780336	1.80383	6.02562	32.7425	29.559	36.1775	4.41739	4.32002	4.44378		285	31.2956	25.5636	24.9547
286	27.6659	24.7017	21.5553	22.484	22.4793	35.1469	44.7682	41.4849	25.805	40.9176	29.8432	14.9173	6.85939	3.88716	4.62247	16.6051	7.35074	4.24366	3.17305	1.61927	9.18772	17.1815	18.9885	9.33762	22.1543	25.3661	20.584	18.349	31.0848	31.8715	18.9642	12.5889	5.32936	7.88552	1.79223	0.780357	1.79407	5.97123	32.5836	29.4535	35.9566	4.40957	4.31136	4.43311		286	31.2598	25.4383	24.8692
287	27.537	24.641	21.426	22.441	22.4972	35.1132	44.7601	41.4905	25.6672	40.7847	29.8157	14.9307	6.90513	3.90436	4.62942	16.6754	7.35016	4.27994	3.18371	1.61811	9.20107	17.1674	19.0197	9.37729	22.1825	25.3504	20.6521	18.3765	31.0837	31.9095	18.9463	12.5996	5.36992	7.85106	1.77515	0.780853	1.78455	5.91875	32.4248	29.3488	35.7358	4.40186	4.30165	4.4237		287	31.2235	25.3131	24.7836
288	27.4044	24.5779	21.2952	22.3992	22.516	35.0805	44.7502	41.4936	25.5332	40.6499	29.7888	14.9455	6.95176	3.92191	4.63659	16.7468	7.34985	4.31653	3.19381	1.61722	9.21276	17.1533	19.0497	9.41588	22.2102	25.332	20.7187	18.4061	31.0797	31.9478	18.9276	12.6131	5.41063	7.81753	1.75749	0.781821	1.7754	5.86834	32.2661	29.2449	35.5153	4.39422	4.29087	4.4156		288	31.1868	25.1883	24.6979
289	27.2682	24.5123	21.1629	22.3588	22.5357	35.0488	44.7385	41.4938	25.4033	40.5133	29.7624	14.9617	6.99919	3.9397	4.64391	16.8191	7.34985	4.35337	3.20332	1.61655	9.22276	17.1393	19.0785	9.45331	22.2374	25.311	20.7836	18.4378	31.0726	31.9864	18.9083	12.6291	5.45144	7.78497	1.73928	0.783257	1.76674	5.82015	32.1076	29.1419	35.2952	4.38662	4.27903	4.40887		289	31.1496	25.0641	24.6121
290	27.1285	24.4441	21.0295	22.3199	22.5562	35.0182	44.7249	41.4913	25.2775	40.3747	29.7363	14.979	7.04731	3.95761	4.65135	16.8921	7.3502	4.39041	3.21219	1.61609	9.23102	17.1253	19.106	9.48953	22.2639	25.2875	20.8468	18.4717	31.0626	32.0251	18.8882	12.6479	5.4923	7.75342	1.72058	0.785158	1.7587	5.77432	31.9492	29.0399	35.0757	4.37902	4.26613	4.40355		290	31.1122	24.9406	24.5264
291	26.9852	24.3732	20.895	22.2825	22.5776	34.9886	44.7095	41.4858	25.1561	40.2341	29.7104	14.9976	7.09602	3.97553	4.65884	16.9658	7.35094	4.42762	3.22039	1.61581	9.23752	17.1113	19.1322	9.52446	22.2898	25.2614	20.9083	18.5077	31.0497	32.0637	18.8673	12.6693	5.53315	7.72289	1.70141	0.787523	1.7514	5.73099	31.791	28.9388	34.8572	4.37141	4.25219	4.39969		291	31.0745	24.818	24.4408
292	26.8386	24.2995	20.7596	22.2466	22.5996	34.9601	44.6922	41.4773	25.0391	40.0916	29.6845	15.0171	7.14522	3.99333	4.66633	17.0398	7.35211	4.46493	3.2279	1.61569	9.24224	17.0972	19.157	9.55807	22.315	25.233	20.9679	18.5457	31.034	32.1023	18.8458	12.6933	5.57393	7.69342	1.68182	0.790348	1.74498	5.69029	31.6331	28.8388	34.6397	4.36376	4.23721	4.39732		292	31.0367	24.6967	24.3552
293	26.6888	24.2229	20.6235	22.2124	22.6223	34.9326	44.6731	41.4657	24.9267	39.9472	29.6585	15.0377	7.19483	4.01091	4.67379	17.1142	7.35375	4.5023	3.23469	1.6157	9.24514	17.0831	19.1804	9.59029	22.3394	25.2022	21.0256	18.5857	31.0156	32.1405	18.8235	12.7199	5.61458	7.66502	1.66185	0.793631	1.73958	5.65236	31.4754	28.7399	34.4235	4.35604	4.22121	4.39649		293	30.9989	24.5768	24.2699
294	26.5358	24.1433	20.4869	22.1798	22.6456	34.9062	44.6521	41.4509	24.819	39.8008	29.6323	15.0591	7.24475	4.02815	4.68116	17.1886	7.3559	4.53968	3.24072	1.61584	9.24622	17.0688	19.2024	9.6211	22.363	25.1692	21.0813	18.6278	30.9945	32.1783	18.8005	12.749	5.65504	7.63772	1.64154	0.797369	1.73531	5.6173	31.318	28.6423	34.2088	4.34824	4.20422	4.39723		294	30.9611	24.4585	24.1848
295	26.3799	24.0607	20.35	22.1488	22.6694	34.8808	44.6292	41.4329	24.7162	39.6525	29.6057	15.0814	7.2949	4.04496	4.6884	17.2629	7.35859	4.57701	3.24597	1.61608	9.24547	17.0543	19.2228	9.65044	22.3859	25.134	21.1351	18.6718	30.971	32.2155	18.7768	12.7806	5.69523	7.61153	1.62093	0.801559	1.73233	5.58525	31.1609	28.546	33.9958	4.34033	4.18625	4.39955		295	30.9233	24.342	24.1
296	26.2212	23.975	20.2128	22.1195	22.6936	34.8565	44.6046	41.4116	24.6183	39.5023	29.5785	15.1042	7.34518	4.06122	4.69546	17.3371	7.36187	4.61424	3.25042	1.6164	9.24288	17.0396	19.2417	9.6783	22.4078	25.0967	21.1867	18.7178	30.945	32.2521	18.7525	12.8147	5.7351	7.58647	1.60007	0.8062	1.73076	5.55629	31.004	28.451	33.7847	4.33231	4.16735	4.40348		296	30.8857	24.2276	24.0156
297	26.0598	23.8861	20.0758	22.092	22.7181	34.8332	44.5781	41.3869	24.5254	39.3501	29.5508	15.1277	7.39553	4.07684	4.7023	17.4108	7.36576	4.65133	3.25404	1.61679	9.23846	17.0248	19.2591	9.70465	22.4288	25.0575	21.2363	18.7655	30.9167	32.2877	18.7275	12.8512	5.77456	7.56256	1.579	0.811287	1.73075	5.53055	30.8474	28.3575	33.5756	4.32415	4.14753	4.40903		297	30.8482	24.1155	23.9317
298	25.896	23.7941	19.9389	22.0661	22.7428	34.811	44.5499	41.3587	24.4377	39.196	29.5222	15.1516	7.44585	4.09173	4.70888	17.4839	7.3703	4.68822	3.25682	1.61725	9.23221	17.0096	19.2749	9.72946	22.4489	25.0163	21.2836	18.815	30.8862	32.3224	18.702	12.8899	5.81355	7.5398	1.55778	0.81682	1.73244	5.5081	30.691	28.2656	33.3689	4.31586	4.12684	4.41622		298	30.8109	24.0059	23.8482
299	25.7298	23.6989	19.8024	22.0419	22.7677	34.7898	44.52	41.3269	24.3552	39.0401	29.4926	15.1759	7.49609	4.1058	4.71516	17.5563	7.37553	4.72486	3.25874	1.61775	9.22415	16.9942	19.2892	9.75273	22.468	24.9733	21.3287	18.8662	30.8537	32.3559	18.6759	12.931	5.85199	7.5182	1.53643	0.822795	1.73595	5.48904	30.5349	28.1752	33.1646	4.30741	4.10532	4.42504		299	30.7738	23.899	23.7653
300	25.5616	23.6004	19.6665	22.0194	22.7925	34.7696	44.4885	41.2915	24.278	38.8823	29.462	15.2005	7.54616	4.11896	4.7211	17.6277	7.38147	4.76121	3.25978	1.61829	9.2143	16.9785	19.302	9.77444	22.4861	24.9286	21.3716	18.9191	30.8192	32.3881	18.6493	12.9742	5.88982	7.49779	1.51502	0.82921	1.74143	5.47346	30.3791	28.0865	32.9629	4.2988	4.083	4.4355		300	30.737	23.7949	23.683
301	25.3915	23.4988	19.5313	21.9985	22.8172	34.7503	44.4553	41.2525	24.2062	38.7227	29.4303	15.2252	7.596	4.13114	4.72666	17.6981	7.38815	4.79721	3.25993	1.61886	9.20269	16.9624	19.3131	9.7946	22.5031	24.8823	21.4121	18.9734	30.783	32.4189	18.6222	13.0196	5.92696	7.47855	1.49358	0.836061	1.74902	5.46141	30.2235	27.9996	32.7642	4.29003	4.05994	4.44757		301	30.7005	23.694	23.6013
302	25.2198	23.3939	19.397	21.9792	22.8417	34.7319	44.4206	41.2096	24.1397	38.5613	29.3972	15.2499	7.64555	4.14227	4.73182	17.7672	7.3956	4.83282	3.25919	1.61947	9.18935	16.946	19.3228	9.81321	22.519	24.8346	21.4503	19.0292	30.7452	32.448	18.5948	13.067	5.96333	7.4605	1.47215	0.843346	1.75885	5.45299	30.0681	27.9145	32.5684	4.28109	4.03617	4.46125		302	30.6643	23.5963	23.5204
303	25.0466	23.2859	19.2637	21.9615	22.8658	34.7145	44.3843	41.163	24.0787	38.3982	29.3626	15.2745	7.69474	4.15229	4.73653	17.835	7.40384	4.86799	3.25755	1.6201	9.17431	16.9292	19.331	9.83028	22.5338	24.7854	21.486	19.0864	30.7059	32.4754	18.5669	13.1163	5.99887	7.44364	1.45079	0.851063	1.77105	5.44823	29.9129	27.8313	32.376	4.27198	4.01175	4.47651		303	30.6283	23.502	23.4403
304	24.8722	23.1747	19.1317	21.9454	22.8895	34.6979	44.3466	41.1125	24.0232	38.2334	29.3265	15.299	7.74352	4.16113	4.74079	17.9011	7.41289	4.90268	3.25499	1.62076	9.15763	16.912	19.3376	9.84583	22.5475	24.7349	21.5194	19.1448	30.6653	32.501	18.5388	13.1675	6.03349	7.42798	1.42953	0.859208	1.78577	5.4472	29.7579	27.75	32.1869	4.26271	3.98673	4.49332		304	30.5926	23.4114	23.3609
305	24.6968	23.0604	19.0011	21.9307	22.9125	34.6821	44.3075	41.058	23.9731	38.067	29.2888	15.3231	7.79183	4.16875	4.74454	17.9655	7.42277	4.93684	3.25153	1.62146	9.13935	16.8943	19.3428	9.85988	22.5601	24.6833	21.5504	19.2043	30.6236	32.5245	18.5105	13.2205	6.06714	7.41352	1.40842	0.867778	1.80312	5.44996	29.6032	27.6707	32.0014	4.25327	3.96116	4.51164		305	30.5572	23.3245	23.2824
306	24.5207	22.9432	18.8721	21.9175	22.9349	34.667	44.2671	40.9996	23.9286	37.8991	29.2493	15.3469	7.83962	4.1751	4.74779	18.028	7.4335	4.97043	3.24715	1.62218	9.11953	16.8762	19.3467	9.87246	22.5715	24.6305	21.5788	19.2649	30.5808	32.5458	18.482	13.2751	6.09973	7.40026	1.38751	0.876771	1.82325	5.45652	29.4487	27.5934	31.8198	4.24367	3.9351	4.53143		306	30.5221	23.2416	23.2047
307	24.3442	22.823	18.7447	21.9056	22.9564	34.6526	44.2253	40.9371	23.8895	37.7296	29.208	15.3701	7.88685	4.18016	4.7505	18.0885	7.44508	5.00342	3.24188	1.62295	9.09823	16.8576	19.3491	9.88359	22.5818	24.5769	21.6048	19.3265	30.5373	32.5648	18.4533	13.3313	6.1312	7.38821	1.36684	0.886184	1.84627	5.46694	29.2943	27.5182	31.6421	4.23392	3.9086	4.55264		307	30.4872	23.1627	23.128
308	24.1674	22.6999	18.6192	21.895	22.9769	34.6389	44.1823	40.8706	23.8559	37.5588	29.1647	15.3927	7.93346	4.18389	4.75265	18.1468	7.45752	5.03575	3.2357	1.62376	9.07551	16.8386	19.3503	9.89332	22.5909	24.5224	21.6284	19.3889	30.4931	32.5815	18.4247	13.389	6.16147	7.37735	1.34644	0.896013	1.87231	5.48125	29.1402	27.4451	31.4685	4.22402	3.88171	4.57522		308	30.4525	23.0879	23.0522
309	23.9906	22.5741	18.4956	21.8856	22.9964	34.6256	44.1381	40.8	23.8277	37.3867	29.1194	15.4146	7.97943	4.18629	4.75424	18.2027	7.47084	5.0674	3.22863	1.62463	9.05145	16.8191	19.3503	9.90168	22.5989	24.4672	21.6494	19.452	30.4484	32.5955	18.396	13.448	6.19049	7.3677	1.32636	0.906256	1.90149	5.49946	28.9862	27.3742	31.2992	4.21397	3.85449	4.59911		309	30.418	23.0175	22.9773
310	23.8141	22.4457	18.3742	21.8773	23.0146	34.6128	44.0927	40.7252	23.8049	37.2133	29.072	15.4357	8.0247	4.18733	4.75525	18.2563	7.48503	5.09833	3.22068	1.62557	9.02611	16.7991	19.3491	9.90873	22.6057	24.4113	21.668	19.5158	30.4034	32.6069	18.3674	13.5083	6.21819	7.35925	1.30665	0.91691	1.93393	5.52159	28.8325	27.3054	31.1344	4.20379	3.82699	4.62423		310	30.3836	22.9514	22.9033
311	23.6381	22.3148	18.255	21.87	23.0315	34.6004	44.0462	40.6463	23.7875	37.0389	29.0224	15.4558	8.06925	4.18701	4.75567	18.3072	7.50009	5.1285	3.21187	1.62658	8.99958	16.7786	19.3468	9.91451	22.6115	24.355	21.6842	19.58	30.3583	32.6156	18.339	13.5698	6.24451	7.352	1.28734	0.927973	1.96974	5.54766	28.679	27.2387	30.9742	4.19349	3.79928	4.65052		311	30.3493	22.8898	22.8302
312	23.463	22.1815	18.1381	21.8637	23.047	34.5883	43.9986	40.5633	23.7754	36.8634	28.9706	15.475	8.11304	4.18534	4.7555	18.3554	7.51601	5.15788	3.20221	1.62768	8.97193	16.7576	19.3435	9.91907	22.6161	24.2983	21.6978	19.6447	30.3132	32.6213	18.3108	13.6323	6.26939	7.34595	1.26848	0.939441	2.00903	5.57767	28.5258	27.1743	30.8188	4.18307	3.7714	4.67789		312	30.3151	22.8327	22.7581
313	23.2889	22.0461	18.0237	21.8583	23.0609	34.5765	43.95	40.476	23.7684	36.6871	28.9165	15.493	8.15605	4.18233	4.75473	18.4009	7.5328	5.18645	3.19172	1.62889	8.94326	16.7361	19.3393	9.92247	22.6198	24.2414	21.7091	19.7098	30.2682	32.6241	18.2828	13.6958	6.29277	7.34109	1.2501	0.951313	2.0519	5.61163	28.3728	27.1119	30.6683	4.17255	3.74342	4.70627		313	30.2809	22.7801	22.6868
314	23.116	21.9086	17.9118	21.8536	23.0731	34.5647	43.9004	40.3847	23.7666	36.51	28.8601	15.5098	8.19824	4.17801	4.75336	18.4434	7.55044	5.21418	3.18043	1.63022	8.91364	16.7142	19.3343	9.92478	22.6224	24.1844	21.718	19.775	30.2236	32.6239	18.2552	13.7601	6.31459	7.33743	1.23225	0.963587	2.09846	5.64952	28.2202	27.0517	30.5229	4.16194	3.71538	4.73557		314	30.2467	22.7322	22.6165
315	22.9448	21.7693	17.8026	21.8495	23.0835	34.5529	43.8497	40.2891	23.7698	36.3323	28.8014	15.5253	8.23959	4.1724	4.7514	18.4829	7.56891	5.24103	3.16834	1.63168	8.88316	16.6918	19.3285	9.92605	22.624	24.1273	21.7245	19.8403	30.1795	32.6205	18.2279	13.8251	6.33482	7.33495	1.21496	0.976262	2.1488	5.69135	28.0678	26.9936	30.3827	4.15124	3.68733	4.7657		315	30.2124	22.6889	22.547
316	22.7754	21.6283	17.6962	21.846	23.0921	34.541	43.7981	40.1894	23.778	36.1542	28.7402	15.5395	8.28008	4.16553	4.74885	18.5193	7.5882	5.267	3.1555	1.63329	8.85192	16.6689	19.3221	9.92636	22.6248	24.0703	21.7286	19.9057	30.1361	32.6139	18.2011	13.8908	6.35339	7.33366	1.19829	0.989335	2.203	5.73711	27.9159	26.9376	30.2478	4.14046	3.65934	4.79655		316	30.178	22.6502	22.4783
317	22.608	21.4859	17.5926	21.8429	23.0986	34.5289	43.7455	40.0856	23.7909	35.9756	28.6766	15.5522	8.3197	4.15745	4.74572	18.5525	7.60827	5.29205	3.14193	1.63507	8.82	16.6457	19.3152	9.92576	22.6247	24.0136	21.7305	19.9709	30.0935	32.604	18.1748	13.9569	6.37028	7.33355	1.18225	1.00281	2.26117	5.78677	27.7643	26.8837	30.1184	4.12963	3.63143	4.82804		317	30.1433	22.6162	22.4103
318	22.4429	21.3422	17.4919	21.8401	23.1031	34.5165	43.6919	39.9777	23.8085	35.797	28.6106	15.5634	8.35842	4.14821	4.74202	18.5824	7.62912	5.31618	3.12766	1.63702	8.7875	16.622	19.3079	9.92434	22.6239	23.9572	21.7302	20.036	30.0518	32.5908	18.1489	14.0234	6.38543	7.33461	1.16691	1.01668	2.32336	5.84032	27.6132	26.8317	29.9945	4.11874	3.60366	4.86006		318	30.1085	22.5867	22.3431
319	22.2803	21.1974	17.3943	21.8375	23.1054	34.5036	43.6374	39.8657	23.8306	35.6182	28.5421	15.573	8.39624	4.13785	4.73777	18.6091	7.65071	5.33936	3.11272	1.63917	8.75451	16.598	19.3002	9.92216	22.6223	23.9012	21.7277	20.1008	30.0113	32.5743	18.1237	14.0902	6.3988	7.33683	1.1523	1.03094	2.38967	5.89774	27.4626	26.7817	29.8763	4.10781	3.57608	4.89251		319	30.0733	22.5617	22.2765
320	22.1205	21.0518	17.2996	21.835	23.1055	34.4903	43.5818	39.7498	23.8572	35.4397	28.4712	15.581	8.43314	4.12645	4.73298	18.6324	7.673	5.36158	3.09714	1.64154	8.72113	16.5736	19.2923	9.91929	22.6202	23.8458	21.7232	20.1652	29.9719	32.5544	18.0991	14.1572	6.41038	7.34021	1.13845	1.04561	2.46014	5.959	27.3126	26.7336	29.7638	4.09685	3.54873	4.92528		320	30.0377	22.5412	22.2105
321	21.9636	20.9055	17.2081	21.8324	23.1032	34.4762	43.5252	39.63	23.8879	35.2614	28.3978	15.5873	8.46911	4.11407	4.72767	18.6523	7.69596	5.38283	3.08097	1.64412	8.68744	16.5489	19.2843	9.91582	22.6175	23.7911	21.7165	20.2292	29.934	32.531	18.0751	14.2241	6.42012	7.34473	1.12541	1.06067	2.53485	6.02406	27.1633	26.6873	29.6572	4.08586	3.52164	4.95827		321	30.0018	22.5251	22.1451
322	21.8099	20.7589	17.1197	21.8297	23.0985	34.4614	43.4676	39.5063	23.9227	35.0837	28.322	15.5919	8.50414	4.10078	4.72186	18.6687	7.71955	5.40311	3.06424	1.64695	8.65353	16.524	19.2763	9.91181	22.6144	23.7371	21.708	20.2927	29.8975	32.5043	18.0518	14.291	6.428	7.35038	1.11322	1.07614	2.61385	6.09291	27.0146	26.6427	29.5565	4.07486	3.49484	4.99136		322	29.9654	22.5133	22.0801
323	21.6596	20.612	17.0346	21.8266	23.0915	34.4457	43.4089	39.3788	23.9615	34.9066	28.2437	15.5947	8.53824	4.08665	4.71559	18.6817	7.74373	5.4224	3.04699	1.65003	8.6195	16.4988	19.2684	9.90734	22.6111	23.6841	21.6975	20.3556	29.8626	32.4741	18.0292	14.3578	6.434	7.35715	1.10193	1.09202	2.69718	6.1655	26.8667	26.5998	29.4617	4.06385	3.46838	5.02446		323	29.9284	22.5057	22.0154
324	21.5129	20.4652	16.9526	21.8232	23.0819	34.4289	43.3491	39.2476	24.0039	34.7304	28.1631	15.5956	8.5714	4.07176	4.70886	18.6912	7.76845	5.44071	3.02926	1.65337	8.58543	16.4735	19.2606	9.90248	22.6075	23.632	21.6852	20.4177	29.8294	32.4405	18.0073	14.4242	6.43809	7.36503	1.09157	1.1083	2.78489	6.24179	26.7197	26.5585	29.373	4.05284	3.44229	5.05744		324	29.891	22.5021	21.9511
325	21.3698	20.3186	16.874	21.8192	23.0697	34.411	43.2881	39.1129	24.0498	34.5553	28.08	15.5947	8.60361	4.0562	4.70172	18.6973	7.79367	5.45804	3.01109	1.65698	8.55141	16.4481	19.2532	9.89732	22.6038	23.581	21.6713	20.4792	29.798	32.4034	17.9861	14.4902	6.44027	7.37398	1.08218	1.125	2.87701	6.32176	26.5736	26.5186	29.2903	4.04183	3.41658	5.09021		325	29.8528	22.5024	21.887
326	21.2307	20.1726	16.7986	21.8146	23.055	34.3919	43.2259	38.9748	24.0991	34.3813	27.9947	15.5919	8.63488	4.04005	4.69419	18.6999	7.81934	5.47439	2.99253	1.66088	8.51752	16.4227	19.2462	9.89193	22.6002	23.5311	21.6557	20.5398	29.7685	32.363	17.9657	14.5556	6.44051	7.38399	1.07382	1.14212	2.97357	6.40535	26.4285	26.4802	29.2138	4.03083	3.39129	5.12265		326	29.8141	22.5064	21.8231
327	21.0957	20.0272	16.7266	21.8092	23.0376	34.3713	43.1624	38.8332	24.1515	34.2088	27.907	15.5872	8.66522	4.0234	4.6863	18.6991	7.84539	5.48976	2.97362	1.66506	8.48383	16.3972	19.2397	9.88638	22.5967	23.4826	21.6386	20.5995	29.741	32.3193	17.946	14.6204	6.43882	7.39505	1.06653	1.15967	3.07457	6.49252	26.2846	26.443	29.1433	4.01985	3.36644	5.15466		327	29.7746	22.5141	21.7592
328	20.9649	19.8827	16.6578	21.8029	23.0177	34.3493	43.0975	38.6885	24.2068	34.038	27.8171	15.5805	8.69462	4.00634	4.67809	18.6949	7.87178	5.50417	2.9544	1.66954	8.45044	16.3719	19.2338	9.88074	22.5935	23.4354	21.62	20.6583	29.7156	32.2723	17.9271	14.6845	6.43519	7.40711	1.06034	1.17765	3.18005	6.58324	26.1418	26.407	29.079	4.00888	3.34203	5.18614		328	29.7344	22.5251	21.6953
329	20.8384	19.7394	16.5924	21.7955	22.995	34.3257	43.0313	38.5407	24.2647	33.8689	27.725	15.5719	8.7231	3.98896	4.66959	18.6874	7.89844	5.51762	2.93493	1.67431	8.4174	16.3467	19.2285	9.8751	22.5908	23.3896	21.6002	20.7161	29.6923	32.222	17.9089	14.7476	6.42961	7.42016	1.05531	1.19608	3.28999	6.67745	26.0003	26.3721	29.0207	3.99793	3.3181	5.21699		329	29.6934	22.5392	21.6313
330	20.7164	19.5974	16.5304	21.787	22.9697	34.3003	42.9635	38.39	24.3252	33.7019	27.6307	15.5613	8.75065	3.97135	4.66083	18.6766	7.92532	5.53014	2.91524	1.67938	8.3848	16.3217	19.224	9.86952	22.5886	23.3454	21.5791	20.7728	29.6712	32.1686	17.8915	14.8098	6.42209	7.43416	1.05149	1.21496	3.40439	6.7751	25.8602	26.3381	28.9685	3.987	3.29464	5.2471		330	29.6516	22.5564	21.5671
331	20.5989	19.4569	16.4716	21.7773	22.9418	34.2731	42.8941	38.2366	24.3879	33.5371	27.5344	15.5488	8.7773	3.9536	4.65185	18.6625	7.95235	5.54173	2.89539	1.68474	8.35268	16.297	19.2203	9.86407	22.5872	23.3027	21.5569	20.8285	29.6524	32.112	17.8748	14.8709	6.41264	7.44908	1.04891	1.2343	3.52325	6.87615	25.7215	26.305	28.9224	3.97609	3.27166	5.27639		331	29.609	22.5763	21.5026
332	20.4861	19.3182	16.4162	21.7661	22.9112	34.2439	42.8231	38.0805	24.4526	33.3747	27.436	15.5343	8.80305	3.93581	4.6427	18.6453	7.97947	5.55243	2.87543	1.6904	8.32113	16.2727	19.2175	9.85882	22.5866	23.2618	21.5338	20.883	29.6358	32.0525	17.8588	14.9307	6.40125	7.46486	1.04764	1.25412	3.64654	6.98054	25.5844	26.2726	28.8823	3.9652	3.24918	5.30476		332	29.5655	22.5987	21.4378
333	20.3781	19.1814	16.3641	21.7535	22.8779	34.2127	42.7503	37.922	24.5191	33.2149	27.3357	15.5179	8.82792	3.91805	4.63339	18.6251	8.00661	5.56224	2.8554	1.69634	8.29018	16.2489	19.2157	9.85384	22.587	23.2225	21.5097	20.9363	29.6216	31.99	17.8434	14.9892	6.38795	7.48149	1.04772	1.27443	3.77424	7.08823	25.449	26.2409	28.848	3.95433	3.22719	5.33212		333	29.5211	22.6234	21.3726
334	20.2749	19.0467	16.3152	21.7393	22.8421	34.1793	42.6757	37.7614	24.5872	33.0578	27.2335	15.4995	8.85191	3.90042	4.62399	18.6019	8.03371	5.5712	2.83535	1.70256	8.2599	16.2256	19.2149	9.8492	22.5886	23.1851	21.4849	20.9884	29.6097	31.9247	17.8288	15.0462	6.37275	7.49889	1.0492	1.29525	3.90631	7.19916	25.3153	26.2097	28.8197	3.94347	3.2057	5.35839		334	29.4757	22.65	21.3068
335	20.1765	18.9142	16.2696	21.7233	22.8036	34.1437	42.5992	37.5986	24.6566	32.9037	27.1295	15.4791	8.87504	3.88301	4.61451	18.5759	8.06069	5.57934	2.81532	1.70904	8.23033	16.203	19.2152	9.84495	22.5915	23.1495	21.4594	21.0392	29.6003	31.8567	17.8147	15.1017	6.35567	7.51703	1.05213	1.31659	4.0427	7.31327	25.1834	26.1789	28.797	3.93264	3.1847	5.3835		335	29.4295	22.6785	21.2406
336	20.0831	18.7842	16.2272	21.7055	22.7626	34.1057	42.5207	37.4341	24.727	32.7527	27.0238	15.4568	8.89732	3.86589	4.60501	18.5471	8.0875	5.58669	2.79538	1.71579	8.20152	16.1811	19.2166	9.84116	22.5959	23.1158	21.4334	21.0888	29.5932	31.786	17.8013	15.1556	6.33673	7.53586	1.05657	1.33846	4.18337	7.43052	25.0535	26.1484	28.78	3.92181	3.16418	5.40737		336	29.3823	22.7084	21.1736
337	19.9945	18.6567	16.1879	21.6858	22.719	34.0652	42.44	37.2679	24.7984	32.605	26.9165	15.4327	8.91877	3.84914	4.59551	18.5157	8.11406	5.59328	2.77556	1.72277	8.17349	16.1601	19.2191	9.83789	22.6018	23.0841	21.407	21.137	29.5885	31.7129	17.7884	15.2076	6.31596	7.5553	1.06256	1.36089	4.32826	7.55083	24.9256	26.1181	28.7686	3.91099	3.14414	5.42994		337	29.3341	22.7396	21.1061
338	19.911	18.5319	16.1518	21.6641	22.6729	34.0222	42.3572	37.1003	24.8703	32.4608	26.8077	15.4066	8.93941	3.83284	4.58605	18.4819	8.1403	5.59916	2.7559	1.72997	8.14629	16.1399	19.2228	9.8352	22.6096	23.0543	21.3803	21.1839	29.5862	31.6374	17.776	15.2578	6.29338	7.57531	1.07018	1.38388	4.47729	7.67417	24.7998	26.0879	28.7625	3.90018	3.12458	5.45115		338	29.285	22.7717	21.0378
339	19.8324	18.4099	16.1188	21.6402	22.6244	33.9767	42.2721	36.9315	24.9426	32.3202	26.6974	15.3787	8.95925	3.81707	4.57668	18.4457	8.16615	5.60436	2.73647	1.73738	8.11994	16.1208	19.2277	9.83314	22.6192	23.0266	21.3534	21.2295	29.5863	31.5596	17.7641	15.306	6.26903	7.59581	1.07946	1.40748	4.6304	7.80045	24.6761	26.0576	28.7616	3.88936	3.10547	5.47094		339	29.2349	22.8044	20.9687
340	19.7588	18.2909	16.0888	21.6142	22.5736	33.9284	42.1847	36.7617	25.0151	32.1833	26.5857	15.3489	8.9783	3.80188	4.56742	18.4074	8.19156	5.60892	2.7173	1.74496	8.09446	16.1028	19.2338	9.83175	22.6309	23.0009	21.3265	21.2736	29.5888	31.4798	17.7526	15.352	6.24293	7.61674	1.09047	1.43168	4.7875	7.92964	24.5548	26.0273	28.7658	3.87855	3.08681	5.48926		340	29.1838	22.8376	20.8988
341	19.69	18.1749	16.0617	21.5859	22.5204	33.8774	42.0948	36.5912	25.0875	32.0504	26.4729	15.3173	8.99659	3.78733	4.55831	18.3671	8.21644	5.6129	2.69843	1.75271	8.06988	16.086	19.2411	9.8311	22.6448	22.9773	21.2996	21.3164	29.5937	31.398	17.7416	15.3959	6.21514	7.63802	1.10326	1.45652	4.9485	8.06166	24.4358	25.9967	28.7749	3.86772	3.06858	5.50608		341	29.1318	22.8709	20.8281
342	19.6262	18.0621	16.0376	21.5552	22.4649	33.8235	42.0025	36.4201	25.1595	31.9214	26.3589	15.2839	9.01412	3.77349	4.54937	18.3249	8.24073	5.61633	2.67992	1.76058	8.0462	16.0705	19.2496	9.83123	22.661	22.9558	21.2729	21.3577	29.6009	31.3143	17.7308	15.4375	6.18567	7.65958	1.11789	1.48201	5.11331	8.19644	24.3193	25.9659	28.7888	3.85689	3.05077	5.52136		342	29.0788	22.904	20.7566
343	19.5673	17.9524	16.0162	21.5221	22.4072	33.7668	41.9076	36.2488	25.2311	31.7966	26.2439	15.2488	9.03092	3.7604	4.54065	18.2811	8.26437	5.61929	2.66179	1.76856	8.02343	16.0564	19.2593	9.83218	22.6797	22.9365	21.2465	21.3977	29.6104	31.229	17.7204	15.4767	6.15459	7.68134	1.13442	1.50818	5.28181	8.33393	24.2052	25.9347	28.8071	3.84604	3.03336	5.53506		343	29.0248	22.9367	20.6842
344	19.5132	17.846	15.9977	21.4865	22.3473	33.7071	41.8102	36.0773	25.3019	31.676	26.1279	15.212	9.047	3.74812	4.53217	18.2358	8.2873	5.6218	2.6441	1.77661	8.00157	16.0438	19.2701	9.834	22.7009	22.9192	21.2204	21.4362	29.6221	31.1421	17.7102	15.5133	6.12194	7.70321	1.15292	1.53506	5.45389	8.47406	24.0937	25.903	28.8297	3.83517	3.01634	5.54718		344	28.9698	22.9686	20.611
345	19.4638	17.7429	15.9818	21.4484	22.2854	33.6445	41.7101	35.9061	25.3718	31.5597	26.0112	15.1735	9.06236	3.73667	4.52396	18.1892	8.30944	5.62394	2.62688	1.7847	7.98063	16.0328	19.2821	9.83671	22.7249	22.904	21.1949	21.4732	29.6361	31.0539	17.7002	15.5475	6.08777	7.72511	1.17343	1.56266	5.62944	8.61675	23.9848	25.8708	28.8564	3.82427	2.99969	5.5577		345	28.914	22.9996	20.5369
346	19.4191	17.6431	15.9685	21.4077	22.2215	33.5789	41.6073	35.7352	25.4405	31.4479	25.8938	15.1333	9.07704	3.72609	4.51604	18.1415	8.33076	5.62576	2.61016	1.7928	7.9606	16.0235	19.2952	9.84037	22.7517	22.891	21.17	21.5088	29.6523	30.9644	17.6903	15.5789	6.05212	7.74695	1.19602	1.59101	5.80832	8.76194	23.8787	25.838	28.8869	3.81336	2.9834	5.5666		346	28.8571	23.0293	20.462
347	19.379	17.5467	15.9577	21.3643	22.1556	33.5102	41.5018	35.565	25.5079	31.3405	25.7758	15.0915	9.09102	3.71641	4.50843	18.0928	8.35117	5.62733	2.59399	1.80088	7.94146	16.016	19.3094	9.845	22.7814	22.88	21.1458	21.5429	29.6706	30.8738	17.6806	15.6076	6.01506	7.76864	1.22074	1.62014	5.99041	8.90955	23.7753	25.8046	28.9209	3.80242	2.96744	5.5739		347	28.7994	23.0575	20.3863
348	19.3434	17.4537	15.9494	21.3183	22.0879	33.4384	41.3935	35.3957	25.5737	31.2377	25.6574	15.0482	9.10434	3.70765	4.50117	18.0434	8.37064	5.6287	2.57839	1.80891	7.9232	16.0104	19.3245	9.85063	22.8141	22.8712	21.1225	21.5756	29.691	30.7823	17.6709	15.6334	5.97664	7.79009	1.24767	1.65007	6.17556	9.05952	23.6747	25.7706	28.9583	3.79145	2.95181	5.57961		348	28.7407	23.084	20.3098
349	19.3123	17.364	15.9434	21.2696	22.0183	33.3636	41.2826	35.2274	25.6378	31.1394	25.5387	15.0033	9.117	3.69983	4.49425	17.9935	8.38911	5.62993	2.56339	1.81683	7.9058	16.0067	19.3406	9.85729	22.8499	22.8644	21.1	21.6069	29.7134	30.6901	17.6613	15.6563	5.93693	7.81121	1.27685	1.68083	6.36363	9.21175	23.5769	25.7357	28.9988	3.78046	2.93648	5.58372		349	28.6811	23.1085	20.2327
350	19.2855	17.2777	15.9396	21.2182	21.9471	33.2856	41.1689	35.0604	25.7	31.0457	25.4198	14.9569	9.12899	3.69295	4.48771	17.9433	8.40653	5.6311	2.54903	1.82464	7.88925	16.0051	19.3576	9.865	22.889	22.8596	21.0786	21.6367	29.7378	30.5971	17.6516	15.6763	5.89599	7.8319	1.30835	1.71245	6.55445	9.36618	23.482	25.7002	29.0421	3.76944	2.92145	5.58628		350	28.6207	23.1308	20.1548
351	19.2629	17.1948	15.9379	21.164	21.8742	33.2046	41.0525	34.895	25.7602	30.9567	25.3009	14.9091	9.14034	3.68701	4.48154	17.8929	8.42285	5.63227	2.53533	1.83227	7.87351	16.0057	19.3754	9.87379	22.9313	22.8568	21.0583	21.665	29.7641	30.5037	17.6418	15.6932	5.85389	7.85207	1.34223	1.74494	6.74788	9.52272	23.3901	25.6638	29.0878	3.75841	2.90671	5.5873		351	28.5593	23.1507	20.0763
352	19.2444	17.1151	15.9383	21.1072	21.7998	33.1205	40.9335	34.7313	25.8182	30.8723	25.1821	14.8598	9.15104	3.68202	4.47577	17.8426	8.43804	5.63351	2.52232	1.83971	7.85856	16.0084	19.394	9.88367	22.9769	22.856	21.0392	21.6919	29.7923	30.41	17.6319	15.7069	5.8107	7.87162	1.37854	1.77834	6.94375	9.68129	23.3012	25.6267	29.1358	3.74736	2.89223	5.58682		352	28.4971	23.1679	19.9973
353	19.23	17.0387	15.9405	21.0476	21.7239	33.0333	40.8118	34.5696	25.8739	30.7924	25.0635	14.8092	9.1611	3.67795	4.4704	17.7925	8.45205	5.63489	2.51	1.84691	7.84435	16.0134	19.4132	9.89465	23.0258	22.8572	21.0213	21.7173	29.8222	30.3161	17.6219	15.7175	5.76649	7.89047	1.41734	1.81268	7.14189	9.8418	23.2152	25.5887	29.1857	3.73629	2.87801	5.58489		353	28.434	23.1823	19.9179
354	19.2194	16.9655	15.9446	20.9853	21.6465	32.943	40.6876	34.41	25.9271	30.7172	24.9453	14.7572	9.17051	3.67481	4.46544	17.7429	8.46486	5.63648	2.49841	1.85384	7.83086	16.0209	19.433	9.90676	23.0782	22.8602	21.0048	21.7413	29.8538	30.2222	17.6118	15.7249	5.72133	7.90851	1.4587	1.84797	7.34212	10.0042	23.1323	25.5499	29.2372	3.72523	2.86404	5.58155		354	28.3701	23.1938	19.8381
355	19.2126	16.8954	15.9504	20.9203	21.5679	32.8497	40.5609	34.2528	25.9777	30.6464	24.8277	14.7039	9.17927	3.67257	4.46088	17.6939	8.47643	5.63835	2.48755	1.86046	7.81805	16.0307	19.4533	9.92	23.134	22.865	20.9897	21.7639	29.8871	30.1283	17.6014	15.7291	5.67532	7.92565	1.50265	1.88426	7.54426	10.1683	23.0524	25.5104	29.2901	3.71417	2.85031	5.57686		355	28.3054	23.202	19.758
356	19.2095	16.8284	15.9577	20.8527	21.488	32.7535	40.4318	34.0981	26.0257	30.5802	24.7107	14.6494	9.18737	3.6712	4.45673	17.6458	8.48674	5.64056	2.47744	1.86674	7.80587	16.043	19.474	9.93437	23.1933	22.8716	20.9761	21.7851	29.9219	30.0347	17.5908	15.7299	5.62853	7.94182	1.54927	1.92155	7.74814	10.3341	22.9756	25.47	29.344	3.70312	2.83683	5.57087		356	28.2398	23.207	19.6777
357	19.21	16.7643	15.9665	20.7825	21.4069	32.6543	40.3004	33.9462	26.071	30.5184	24.5945	14.5936	9.19481	3.67068	4.45298	17.5986	8.49576	5.64319	2.46809	1.87265	7.79429	16.0579	19.495	9.94988	23.256	22.8799	20.9641	21.8049	29.9582	29.9414	17.5799	15.7274	5.58105	7.95692	1.59859	1.95989	7.95355	10.5014	22.902	25.4289	29.3986	3.6921	2.82357	5.56365		357	28.1735	23.2086	19.5974
358	19.2138	16.7032	15.9766	20.7097	21.3247	32.5522	40.1669	33.7971	26.1134	30.4609	24.4793	14.5367	9.20158	3.67096	4.44962	17.5527	8.50347	5.64631	2.4595	1.87815	7.78325	16.0753	19.5162	9.96652	23.3221	22.8899	20.9536	21.8233	29.996	29.8487	17.5687	15.7216	5.53296	7.97087	1.65068	1.99929	8.16032	10.6703	22.8314	25.3871	29.4536	3.68112	2.81055	5.55527		358	28.1063	23.2066	19.5171
359	19.221	16.6449	15.9879	20.6345	21.2415	32.4473	40.0312	33.651	26.1529	30.4077	24.3653	14.4786	9.20766	3.67202	4.44666	17.5081	8.50988	5.64998	2.45167	1.88322	7.77271	16.0954	19.5375	9.9843	23.3917	22.9015	20.9448	21.8404	30.0351	29.7565	17.5573	15.7124	5.48436	7.9836	1.70558	2.03979	8.36825	10.8405	22.7639	25.3446	29.5088	3.6702	2.79777	5.54581		359	28.0384	23.2009	19.4371
360	19.2314	16.5893	16.0003	20.5568	21.1573	32.3397	39.8937	33.5081	26.1894	30.3586	24.2526	14.4194	9.21303	3.67381	4.44407	17.4651	8.51496	5.65427	2.44461	1.88782	7.76262	16.1182	19.5588	10.0032	23.4646	22.9145	20.9376	21.8561	30.0755	29.6651	17.5455	15.6999	5.43534	7.99502	1.76334	2.0814	8.57714	11.012	22.6995	25.3015	29.5637	3.65935	2.78522	5.53533		360	27.9697	23.1916	19.3573
361	19.2448	16.5362	16.0136	20.4768	21.0723	32.2295	39.7545	33.3685	26.2231	30.3136	24.1413	14.3592	9.21767	3.67628	4.44184	17.4237	8.51871	5.65924	2.43831	1.89194	7.75292	16.1436	19.58	10.0232	23.5408	22.929	20.9322	21.8705	30.117	29.5746	17.5335	15.684	5.38599	8.00508	1.82399	2.12416	8.78679	11.1846	22.6383	25.2578	29.6182	3.6486	2.77291	5.52393		361	27.9002	23.1785	19.2779
362	19.2612	16.4857	16.0278	20.3946	20.9865	32.1167	39.6137	33.2323	26.2537	30.2724	24.0317	14.298	9.22157	3.67939	4.43996	17.3842	8.52114	5.66496	2.43276	1.89554	7.74358	16.1718	19.601	10.0443	23.6202	22.9449	20.9285	21.8835	30.1597	29.4851	17.5211	15.6647	5.33641	8.01371	1.88759	2.16808	8.99701	11.3583	22.5802	25.2135	29.6719	3.63795	2.76084	5.51168		362	27.8299	23.1616	19.1991
363	19.2804	16.4376	16.0426	20.3102	20.9	32.0015	39.4715	33.0997	26.2813	30.2351	23.9239	14.2359	9.22468	3.68308	4.43841	17.3467	8.52224	5.67148	2.42796	1.8986	7.73452	16.2027	19.6217	10.0665	23.7029	22.962	20.9266	21.8953	30.2035	29.3966	17.5083	15.6421	5.2867	8.02085	1.95417	2.2132	9.20758	11.533	22.5252	25.1689	29.7246	3.62744	2.74903	5.49868		363	27.7589	23.1408	19.1209
364	19.3024	16.3917	16.058	20.2238	20.8128	31.8839	39.3281	32.9707	26.306	30.2014	23.818	14.1728	9.227	3.68729	4.43717	17.3113	8.52203	5.67887	2.42389	1.90111	7.72571	16.2364	19.642	10.0898	23.7886	22.9803	20.9265	21.9058	30.2482	29.3093	17.4953	15.6161	5.23697	8.02646	2.02376	2.25954	9.41832	11.7085	22.4733	25.1238	29.7759	3.61709	2.73748	5.48502		364	27.6872	23.1162	19.0436
365	19.327	16.348	16.0738	20.1354	20.725	31.7642	39.1837	32.8454	26.3277	30.1713	23.7143	14.1089	9.22847	3.69199	4.43622	17.2781	8.52053	5.68717	2.42054	1.90304	7.71708	16.2728	19.6618	10.1141	23.8773	22.9998	20.9282	21.9151	30.2938	29.2233	17.4819	15.5869	5.18731	8.03049	2.0964	2.30712	9.62901	11.8847	22.4245	25.0784	29.8256	3.60692	2.72621	5.47078		365	27.6147	23.0878	18.9673
366	19.3542	16.3063	16.09	20.0452	20.6368	31.6424	39.0386	32.7238	26.3466	30.1444	23.6129	14.0442	9.22908	3.6971	4.43553	17.2473	8.51774	5.69644	2.41788	1.90439	7.70859	16.3119	19.681	10.1394	23.9689	23.0202	20.9316	21.9231	30.3403	29.1387	17.4682	15.5544	5.13783	8.0329	2.17211	2.35596	9.83946	12.0616	22.3789	25.0329	29.8734	3.59695	2.71522	5.45606		366	27.5415	23.0556	18.8921
367	19.3837	16.2665	16.1063	19.9534	20.5481	31.5186	38.893	32.606	26.3625	30.1208	23.514	13.9787	9.22877	3.70256	4.43508	17.219	8.5137	5.70672	2.41589	1.90515	7.70018	16.3538	19.6994	10.1657	24.0632	23.0416	20.9369	21.93	30.3874	29.0555	17.4541	15.5188	5.08863	8.03368	2.25092	2.4061	10.0495	12.2389	22.3363	24.9872	29.919	3.58722	2.70453	5.44095		367	27.4675	23.0197	18.8182
368	19.4157	16.2285	16.1226	19.8599	20.4591	31.3932	38.747	32.4921	26.3757	30.1002	23.4178	13.9125	9.22752	3.70833	4.43484	17.1932	8.50842	5.71804	2.41455	1.90529	7.69179	16.3983	19.7171	10.1929	24.1601	23.0639	20.9439	21.9357	30.4352	28.9739	17.4398	15.48	5.03982	8.03281	2.33285	2.45755	10.2588	12.4167	22.2967	24.9414	29.9622	3.57775	2.69416	5.42555		368	27.3928	22.9801	18.7456
369	19.4499	16.1921	16.1388	19.7651	20.3698	31.2661	38.6011	32.3821	26.3862	30.0824	23.3244	13.8457	9.22527	3.71433	4.43478	17.1701	8.50194	5.73046	2.41384	1.90483	7.68337	16.4454	19.7338	10.221	24.2595	23.0869	20.9528	21.9402	30.4836	28.8939	17.4251	15.4381	4.9915	8.03027	2.4179	2.51034	10.4673	12.5947	22.2602	24.8957	30.0028	3.56857	2.68412	5.40994		369	27.3174	22.937	18.6745
370	19.4862	16.1574	16.1548	19.669	20.2803	31.1376	38.4553	32.2759	26.3941	30.0673	23.2341	13.7783	9.22199	3.72052	4.43489	17.1496	8.49429	5.74398	2.41371	1.90376	7.67487	16.4952	19.7495	10.25	24.3612	23.1106	20.9633	21.9437	30.5324	28.8156	17.4102	15.3932	4.94378	8.02607	2.5061	2.56449	10.6748	12.7729	22.2267	24.8502	30.0406	3.55972	2.67443	5.39423		370	27.2413	22.8904	18.6051
371	19.5247	16.124	16.1705	19.5718	20.1907	31.0078	38.3101	32.1736	26.3994	30.0547	23.1469	13.7103	9.21762	3.72682	4.43512	17.1319	8.48551	5.75865	2.41414	1.90207	7.66624	16.5475	19.7642	10.2799	24.4649	23.1349	20.9756	21.9461	30.5816	28.7391	17.395	15.3454	4.89677	8.02023	2.59745	2.62002	10.8811	12.9511	22.1962	24.805	30.0753	3.55121	2.66511	5.37849		371	27.1644	22.8404	18.5376
372	19.5652	16.092	16.1857	19.4737	20.101	30.877	38.1656	32.0751	26.4024	30.0444	23.0631	13.6419	9.21212	3.73318	4.43545	17.1171	8.47564	5.77447	2.4151	1.89978	7.65743	16.6023	19.7777	10.3104	24.5706	23.1597	20.9896	21.9474	30.6311	28.6644	17.3796	15.2948	4.85056	8.01274	2.69195	2.67696	11.0859	13.1293	22.1686	24.76	30.1067	3.54308	2.65617	5.36283		372	27.0868	22.7872	18.4719
373	19.6076	16.0612	16.2004	19.3747	20.0114	30.7453	38.0221	31.9804	26.4031	30.0362	22.9828	13.5731	9.20543	3.73953	4.43585	17.1051	8.46472	5.79146	2.41653	1.89689	7.64839	16.6595	19.7899	10.3418	24.6781	23.1849	21.0052	21.9477	30.6808	28.5915	17.3639	15.2414	4.80527	8.00366	2.78958	2.73533	11.2891	13.3073	22.144	24.7156	30.1346	3.53536	2.64764	5.34732		373	27.0085	22.7309	18.4083
374	19.6519	16.0315	16.2144	19.2752	19.9219	30.613	37.88	31.8894	26.4018	30.03	22.9063	13.5039	9.19752	3.74584	4.43629	17.0959	8.45279	5.80962	2.41842	1.89341	7.63907	16.719	19.8008	10.3737	24.7871	23.2104	21.0225	21.9471	30.7306	28.5206	17.348	15.1854	4.761	7.99302	2.89035	2.79514	11.4906	13.4851	22.1222	24.6717	30.1589	3.52807	2.63952	5.33205		374	26.9295	22.6717	18.3468
375	19.698	16.0028	16.2275	19.1752	19.8325	30.4803	37.7394	31.8021	26.3984	30.0255	22.8337	13.4345	9.18831	3.75202	4.43674	17.0897	8.43991	5.82895	2.4207	1.88937	7.62942	16.7808	19.8103	10.4063	24.8974	23.2361	21.0413	21.9454	30.7804	28.4517	17.332	15.1268	4.71784	7.98087	2.99423	2.85643	11.6901	13.6624	22.1033	24.6284	30.1795	3.52126	2.63185	5.3171		375	26.8499	22.6099	18.2877
376	19.7459	15.9749	16.2398	19.0749	19.7434	30.3473	37.6006	31.7184	26.3933	30.0227	22.7651	13.3649	9.17776	3.75804	4.43718	17.0863	8.42612	5.84944	2.42335	1.88476	7.61941	16.8447	19.8183	10.4395	25.0089	23.262	21.0616	21.9429	30.8302	28.3848	17.3158	15.0658	4.67589	7.96726	3.10119	2.91921	11.8874	13.8393	22.0872	24.5859	30.1961	3.51495	2.62464	5.30255		376	26.7695	22.5454	18.2309
377	19.7954	15.9478	16.251	18.9745	19.6546	30.2144	37.4641	31.6381	26.3865	30.0212	22.7007	13.2951	9.16582	3.76384	4.43758	17.0859	8.41148	5.87107	2.42631	1.87963	7.609	16.9106	19.8248	10.4731	25.1213	23.288	21.0833	21.9395	30.8797	28.3199	17.2994	15.0025	4.63526	7.95227	3.21122	2.9835	12.0825	14.0156	22.0738	24.5442	30.2087	3.50917	2.61791	5.28847		377	26.6885	22.4787	18.1766
378	19.8467	15.9215	16.2612	18.8741	19.5663	30.0818	37.3299	31.5612	26.3783	30.021	22.6408	13.2253	9.15243	3.76936	4.4379	17.0882	8.39603	5.89381	2.42954	1.87399	7.59813	16.9785	19.8296	10.5071	25.2343	23.314	21.1064	21.9352	30.9289	28.2572	17.2829	14.937	4.59602	7.93598	3.32428	3.04933	12.2752	14.1912	22.0632	24.5035	30.2171	3.50394	2.61166	5.27492		378	26.6068	22.4098	18.1249
379	19.8995	15.8957	16.2702	18.7741	19.4784	29.9496	37.1984	31.4876	26.3688	30.0219	22.5853	13.1555	9.13754	3.77456	4.43813	17.0935	8.37983	5.91764	2.433	1.86787	7.58679	17.0481	19.8329	10.5415	25.3478	23.3399	21.1309	21.9301	30.9776	28.1965	17.2663	14.8695	4.55827	7.91847	3.44031	3.1167	12.4653	14.3659	22.0552	24.4637	30.2213	3.49929	2.60593	5.26197		379	26.5244	22.339	18.0759
380	19.9539	15.8703	16.2779	18.6744	19.391	29.8182	37.07	31.417	26.3582	30.0237	22.5346	13.0858	9.1211	3.7794	4.43824	17.1015	8.36294	5.9425	2.43664	1.86129	7.57493	17.1194	19.8344	10.5762	25.4615	23.3657	21.1566	21.9243	31.0258	28.138	17.2497	14.8	4.52209	7.89984	3.55928	3.18565	12.6526	14.5399	22.0498	24.4251	30.2212	3.49525	2.60072	5.24968		380	26.4415	22.2665	18.0297
381	20.0098	15.8454	16.2842	18.5754	19.3043	29.6878	36.9447	31.3495	26.3467	30.0262	22.4887	13.0163	9.10306	3.78382	4.43821	17.1122	8.34541	5.96835	2.44041	1.85431	7.56253	17.1922	19.8342	10.6111	25.5751	23.3912	21.1835	21.9177	31.0734	28.0817	17.2329	14.7288	4.48757	7.88021	3.68112	3.2562	12.8371	14.7128	22.0469	24.3877	30.2167	3.49184	2.59606	5.23809		381	26.3579	22.1926	17.9863
382	20.0671	15.8209	16.2892	18.4771	19.2183	29.5586	36.823	31.2847	26.3345	30.0292	22.4477	12.947	9.08336	3.78779	4.43801	17.1256	8.3273	5.99514	2.44425	1.84694	7.54955	17.2664	19.8322	10.6461	25.6885	23.4165	21.2115	21.9103	31.1202	28.0276	17.2162	14.6559	4.45477	7.85967	3.80577	3.32834	13.0186	14.8847	22.0465	24.3515	30.2078	3.48908	2.59194	5.22726		382	26.2737	22.1175	17.9457
383	20.1259	15.7965	16.2926	18.3798	19.133	29.4309	36.705	31.2226	26.3219	30.0328	22.4119	12.878	9.06196	3.79126	4.43763	17.1415	8.30866	6.02279	2.44814	1.83923	7.53599	17.3418	19.8283	10.6812	25.8014	23.4414	21.2405	21.9023	31.166	27.9757	17.1994	14.5815	4.42378	7.83836	3.93316	3.40212	13.1971	15.0555	22.0484	24.3166	30.1945	3.48699	2.58839	5.21722		383	26.189	22.0414	17.9082
384	20.186	15.7724	16.2945	18.2836	19.0486	29.305	36.591	31.1629	26.309	30.0366	22.3813	12.8095	9.03881	3.79421	4.43706	17.16	8.28955	6.05122	2.45201	1.83122	7.52181	17.4183	19.8226	10.7163	25.9136	23.4659	21.2705	21.8936	31.2108	27.9259	17.1826	14.5057	4.39464	7.81641	4.06321	3.47753	13.3723	15.225	22.0528	24.2832	30.1767	3.48559	2.58541	5.208		384	26.1038	21.9646	17.8736
385	20.2475	15.7483	16.2949	18.1887	18.9651	29.1811	36.4813	31.1055	26.296	30.0405	22.3561	12.7415	9.01388	3.7966	4.43627	17.1809	8.27002	6.08036	2.45583	1.82295	7.50701	17.4956	19.8151	10.7513	26.0247	23.49	21.3013	21.8843	31.2544	27.8784	17.1658	14.4287	4.36743	7.79395	4.19584	3.55461	13.5443	15.3933	22.0593	24.2511	30.1546	3.48489	2.58301	5.19964		385	26.018	21.8873	17.842
386	20.3102	15.7243	16.2936	18.0952	18.8825	29.0594	36.3761	31.0502	26.2831	30.0445	22.3363	12.6741	8.98712	3.79839	4.43525	17.2042	8.25012	6.11012	2.45954	1.81447	7.49157	17.5737	19.8056	10.7861	26.1347	23.5135	21.3329	21.8744	31.2967	27.8332	17.149	14.3506	4.34219	7.77113	4.33094	3.63335	13.7129	15.5602	22.068	24.2206	30.128	3.48491	2.5812	5.19215		386	25.9318	21.8099	17.8135
387	20.3742	15.7002	16.2907	18.0034	18.801	28.9403	36.2755	30.9968	26.2705	30.0484	22.322	12.6073	8.95851	3.79957	4.434	17.2296	8.2299	6.14039	2.4631	1.80584	7.47548	17.6524	19.7943	10.8206	26.2432	23.5365	21.3653	21.8639	31.3375	27.7901	17.1323	14.2716	4.31897	7.74809	4.46844	3.71377	13.878	15.7258	22.0788	24.1915	30.0971	3.48566	2.57998	5.18555		387	25.8451	21.7324	17.7881
388	20.4394	15.6761	16.2862	17.9133	18.7206	28.824	36.1799	30.9451	26.2585	30.0521	22.3134	12.5414	8.928	3.8001	4.4325	17.2571	8.20943	6.17107	2.46648	1.79708	7.45875	17.7314	19.781	10.8549	26.35	23.559	21.3982	21.8529	31.3767	27.7493	17.1155	14.1918	4.29781	7.72499	4.6082	3.79589	14.0396	15.8899	22.0915	24.1641	30.062	3.48714	2.57935	5.17984		388	25.7581	21.6553	17.7657
389	20.5057	15.6518	16.2799	17.8252	18.6413	28.7107	36.0894	30.8949	26.2472	30.0554	22.3106	12.4762	8.89558	3.79997	4.43075	17.2867	8.18873	6.20205	2.46962	1.78827	7.44137	17.8105	19.7658	10.8887	26.4549	23.5808	21.4317	21.8413	31.4142	27.7107	17.0989	14.1113	4.27874	7.70198	4.75012	3.8797	14.1977	16.0525	22.1061	24.1382	30.0226	3.48937	2.57933	5.17501		389	25.6707	21.5787	17.7464
390	20.5731	15.6273	16.272	17.7391	18.5633	28.6007	36.0041	30.8459	26.2369	30.0583	22.3135	12.412	8.86122	3.79915	4.42876	17.3181	8.16787	6.23321	2.47249	1.77945	7.42335	17.8897	19.7488	10.922	26.5577	23.602	21.4657	21.8293	31.4497	27.6743	17.0823	14.0304	4.26179	7.67924	4.89408	3.96523	14.3522	16.2135	22.1226	24.1139	29.9792	3.49233	2.5799	5.17108		390	25.583	21.5028	17.7301
391	20.6415	15.6026	16.2625	17.6552	18.4865	28.4942	35.9244	30.7981	26.2277	30.0607	22.3222	12.3489	8.82491	3.79764	4.42651	17.3512	8.14688	6.26443	2.47506	1.77068	7.4047	17.9687	19.7297	10.9547	26.6582	23.6225	21.5	21.8168	31.4832	27.6401	17.0657	13.949	4.24697	7.65691	5.03994	4.05246	14.5031	16.373	22.1407	24.0912	29.9317	3.49604	2.58106	5.16801		391	25.495	21.4279	17.7169
392	20.7109	15.5776	16.2512	17.5736	18.411	28.3914	35.8502	30.7511	26.2197	30.0626	22.3369	12.2868	8.78664	3.79541	4.424	17.3859	8.1258	6.29556	2.47729	1.76201	7.38544	18.0474	19.7088	10.9867	26.7561	23.6423	21.5346	21.8039	31.5144	27.6081	17.0492	13.8675	4.2343	7.63518	5.18757	4.14141	14.6503	16.5309	22.1603	24.0701	29.8804	3.50048	2.58282	5.16578		392	25.4068	21.3543	17.7067
393	20.7812	15.5523	16.2384	17.4944	18.3368	28.2926	35.7818	30.7048	26.2133	30.0637	22.3574	12.226	8.7464	3.79247	4.42126	17.4221	8.10467	6.32647	2.47914	1.7535	7.36559	18.1255	19.6861	11.0181	26.8513	23.6614	21.5694	21.7906	31.5433	27.5783	17.0327	13.7858	4.22377	7.6142	5.33683	4.23208	14.7939	16.6871	22.1814	24.0506	29.8254	3.50565	2.58517	5.16438		393	25.3184	21.2821	17.6994
394	20.8523	15.5267	16.2239	17.4178	18.2641	28.198	35.7193	30.659	26.2085	30.0641	22.3838	12.1664	8.7042	3.7888	4.41827	17.4596	8.08354	6.35703	2.48059	1.7452	7.34517	18.2028	19.6614	11.0485	26.9436	23.6797	21.6044	21.7768	31.5696	27.5506	17.0163	13.7042	4.21539	7.59414	5.48756	4.32445	14.9339	16.8417	22.2039	24.0327	29.7667	3.51154	2.58809	5.16376		394	25.2299	21.2115	17.6951
395	20.9242	15.5006	16.2079	17.3438	18.1928	28.1078	35.6628	30.6135	26.2055	30.0638	22.4162	12.1082	8.66005	3.78441	4.41506	17.4983	8.06242	6.38709	2.48162	1.73718	7.32421	18.2792	19.635	11.0781	27.0327	23.6974	21.6393	21.7628	31.5932	27.5251	16.9999	13.6228	4.20914	7.57517	5.6396	4.41852	15.0702	16.9946	22.2276	24.0164	29.7047	3.51814	2.59159	5.16389		395	25.1414	21.1428	17.6935
396	20.9968	15.4741	16.1904	17.2725	18.123	28.0222	35.6123	30.568	26.2045	30.0626	22.4545	12.0514	8.61397	3.77928	4.41162	17.538	8.04136	6.41649	2.48219	1.72948	7.30275	18.3545	19.6067	11.1067	27.1187	23.7143	21.6743	21.7483	31.614	27.5016	16.9836	13.5416	4.205	7.55746	5.7928	4.51428	15.2029	17.1458	22.2524	24.0015	29.6393	3.52542	2.59566	5.16472		396	25.0529	21.0762	17.6947
397	21.0699	15.4472	16.1715	17.2041	18.0546	27.9414	35.5681	30.5225	26.2056	30.0605	22.4987	11.9962	8.56597	3.77343	4.40799	17.5787	8.02037	6.44509	2.4823	1.72217	7.28082	18.4284	19.5766	11.1343	27.2012	23.7305	21.7091	21.7335	31.6318	27.4802	16.9672	13.4609	4.20294	7.54116	5.94699	4.61173	15.332	17.2953	22.2782	23.9882	29.5709	3.53338	2.60028	5.16619		397	24.9644	21.0117	17.6986
398	21.1436	15.4197	16.1512	17.1385	17.9877	27.8656	35.53	30.4767	26.209	30.0575	22.5487	11.9426	8.51608	3.76686	4.40417	17.6201	7.99948	6.47274	2.48193	1.7153	7.25848	18.5009	19.5448	11.1607	27.2801	23.7459	21.7437	21.7185	31.6464	27.4609	16.9509	13.3806	4.20293	7.52644	6.10198	4.71083	15.4577	17.4432	22.3048	23.9762	29.4996	3.54199	2.60545	5.16825		398	24.876	20.9497	17.7051
399	21.2178	15.3918	16.1297	17.0759	17.9224	27.7949	35.4983	30.4304	26.2148	30.0536	22.6045	11.8907	8.46435	3.75957	4.40017	17.6621	7.97871	6.49927	2.48106	1.70893	7.23576	18.5718	19.5114	11.1859	27.3553	23.7607	21.7781	21.7031	31.6577	27.4436	16.9346	13.3011	4.20492	7.51346	6.25761	4.81157	15.5799	17.5894	22.3321	23.9657	29.4257	3.55123	2.61116	5.17083		399	24.7878	20.8902	17.714
400	21.2922	15.3634	16.1069	17.0162	17.8586	27.7294	35.4728	30.3835	26.223	30.0487	22.666	11.8405	8.41082	3.75159	4.39603	17.7046	7.95808	6.52453	2.47968	1.70312	7.21273	18.6408	19.4763	11.2098	27.4268	23.7747	21.8121	21.6874	31.6655	27.4282	16.9182	13.2222	4.20888	7.50237	6.41368	4.91392	15.6987	17.7338	22.36	23.9564	29.3492	3.56107	2.61739	5.17387		400	24.6998	20.8335	17.7254
401	21.3669	15.3344	16.0831	16.9596	17.7964	27.6694	35.4537	30.3358	26.2338	30.0428	22.7332	11.7921	8.35555	3.74292	4.39177	17.7475	7.93759	6.54837	2.4778	1.69792	7.18943	18.7078	19.4396	11.2324	27.4943	23.7881	21.8457	21.6715	31.6697	27.4148	16.9019	13.1442	4.21473	7.4933	6.57001	5.01785	15.8142	17.8767	22.3884	23.9485	29.2705	3.57148	2.62414	5.1773		401	24.6121	20.7795	17.739
402	21.4417	15.3049	16.0583	16.9061	17.7357	27.6149	35.441	30.2873	26.2474	30.036	22.8058	11.7457	8.29858	3.73357	4.38739	17.7905	7.91727	6.57064	2.47541	1.69339	7.16594	18.7727	19.4013	11.2536	27.5578	23.8007	21.8788	21.6554	31.6701	27.4032	16.8854	13.0671	4.22243	7.48641	6.72641	5.12332	15.9265	18.0178	22.4171	23.9416	29.1897	3.58243	2.63139	5.18104		402	24.5248	20.7285	17.7547
403	21.5166	15.2748	16.0325	16.8556	17.6765	27.566	35.4345	30.2377	26.2636	30.0282	22.8839	11.7012	8.23999	3.72358	4.38294	17.8337	7.89711	6.59118	2.47252	1.68957	7.14231	18.8352	19.3616	11.2733	27.6172	23.8127	21.9113	21.6391	31.6667	27.3935	16.869	12.9911	4.23189	7.48182	6.88267	5.23029	16.0357	18.1573	22.446	23.9359	29.1071	3.59388	2.63914	5.185		403	24.4378	20.6805	17.7724
404	21.5913	15.2442	16.0061	16.8082	17.6189	27.5229	35.4343	30.187	26.2828	30.0195	22.9672	11.6588	8.17986	3.71296	4.37844	17.8767	7.87712	6.60984	2.46913	1.68652	7.11861	18.8954	19.3205	11.2915	27.6724	23.8241	21.9433	21.6225	31.6593	27.3855	16.8524	12.9161	4.24305	7.47966	7.03861	5.33872	16.1419	18.2952	22.4749	23.9312	29.0229	3.60581	2.64737	5.18911		404	24.3513	20.6357	17.792
405	21.6658	15.213	15.979	16.7639	17.5627	27.4855	35.4403	30.135	26.3047	30.0098	23.0557	11.6184	8.11826	3.70174	4.37392	17.9197	7.85731	6.62648	2.46525	1.68429	7.09492	18.9529	19.2781	11.308	27.7234	23.8349	21.9745	21.6058	31.6477	27.3793	16.8357	12.8423	4.25583	7.48004	7.19402	5.44855	16.2453	18.4315	22.5037	23.9274	28.9373	3.61817	2.65608	5.19328		405	24.2653	20.5941	17.8133
406	21.7399	15.1812	15.9514	16.7226	17.5081	27.454	35.4525	30.0817	26.3297	29.9992	23.1491	11.5802	8.05529	3.68995	4.36939	17.9623	7.83766	6.64096	2.46091	1.68292	7.07132	19.0078	19.2343	11.3229	27.7702	23.8451	22.005	21.5889	31.6319	27.3747	16.819	12.7698	4.27014	7.48308	7.34869	5.55973	16.3458	18.5662	22.5324	23.9244	28.8506	3.63094	2.66525	5.19742		406	24.1798	20.5557	17.8362
407	21.8136	15.1489	15.9234	16.6844	17.4549	27.4284	35.4708	30.027	26.3575	29.9876	23.2473	11.5442	7.99103	3.67761	4.36491	18.0045	7.81818	6.65314	2.45611	1.68246	7.04787	19.0599	19.1894	11.3361	27.8127	23.8547	22.0347	21.5719	31.6117	27.3718	16.8021	12.6986	4.2859	7.48887	7.50243	5.6722	16.4438	18.6993	22.5607	23.9222	28.7629	3.64406	2.67488	5.20143		407	24.095	20.5207	17.8604
408	21.8867	15.116	15.8952	16.6491	17.4031	27.4087	35.4951	29.9709	26.3884	29.9752	23.3501	11.5105	7.92559	3.66476	4.36048	18.0462	7.79886	6.66289	2.45089	1.68296	7.02466	19.109	19.1433	11.3476	27.8509	23.8638	22.0635	21.5548	31.5871	27.3703	16.785	12.6287	4.30301	7.4975	7.65503	5.78587	16.5393	18.8309	22.5885	23.9206	28.6746	3.65751	2.68497	5.20524		408	24.0108	20.489	17.886
409	21.9591	15.0825	15.8669	16.6168	17.3527	27.395	35.5253	29.9132	26.4222	29.9619	23.4573	11.479	7.85908	3.65144	4.35615	18.0873	7.77968	6.6701	2.44526	1.68445	7.00178	19.1551	19.0962	11.3572	27.8848	23.8723	22.0914	21.5376	31.5579	27.3704	16.7678	12.5603	4.32138	7.50905	7.80629	5.90069	16.6324	18.9609	22.6156	23.9196	28.5858	3.67123	2.69551	5.20875		409	23.9273	20.4607	17.9126
410	22.0306	15.0485	15.8386	16.5874	17.3037	27.3871	35.5612	29.8541	26.4589	29.9478	23.5687	11.4498	7.79161	3.63768	4.35194	18.1277	7.76065	6.67464	2.43926	1.68697	6.9793	19.1981	19.0481	11.365	27.9143	23.8804	22.1184	21.5203	31.5241	27.3718	16.7505	12.4934	4.3409	7.52358	7.95601	6.01657	16.7234	19.0895	22.6421	23.919	28.4968	3.6852	2.7065	5.21185		410	23.8445	20.4357	17.94
411	22.1011	15.014	15.8105	16.5608	17.2559	27.3852	35.6028	29.7934	26.4986	29.9329	23.684	11.4231	7.72331	3.62353	4.34788	18.1673	7.74173	6.67642	2.43292	1.69056	6.95732	19.238	18.9991	11.3709	27.9397	23.888	22.1442	21.503	31.4857	27.3746	16.7329	12.4279	4.36148	7.54114	8.10397	6.13342	16.8123	19.2165	22.6677	23.9187	28.4077	3.69937	2.71794	5.21447		411	23.7624	20.4141	17.9683
412	22.1705	14.9789	15.7828	16.537	17.2094	27.3891	35.6499	29.7312	26.5412	29.9172	23.803	11.3987	7.65428	3.60902	4.34401	18.206	7.72293	6.67533	2.42628	1.69525	6.93592	19.2746	18.9494	11.3749	27.9608	23.8952	22.169	21.4858	31.4425	27.3785	16.7152	12.3641	4.38301	7.56179	8.25	6.25116	16.8995	19.342	22.6923	23.9187	28.3189	3.7137	2.72983	5.21651		412	23.6812	20.3958	17.997
413	22.2386	14.9434	15.7556	16.5158	17.164	27.3987	35.7024	29.6676	26.5867	29.9008	23.9254	11.3768	7.58467	3.5942	4.34036	18.2437	7.70422	6.67129	2.41937	1.70107	6.91519	19.3079	18.8989	11.377	27.9777	23.9019	22.1927	21.4685	31.3946	27.3836	16.6973	12.3018	4.40539	7.58556	8.39388	6.36968	16.9849	19.4661	22.7159	23.9189	28.2305	3.72815	2.74218	5.21787		413	23.6007	20.3808	18.0261
414	22.3053	14.9073	15.7291	16.4971	17.1198	27.4141	35.7599	29.6025	26.635	29.8838	24.051	11.3573	7.51461	3.57912	4.33696	18.2804	7.68559	6.66422	2.41224	1.70804	6.89521	19.3379	18.8479	11.377	27.9905	23.9082	22.2152	21.4513	31.3418	27.3898	16.6792	12.2412	4.42851	7.61245	8.53543	6.48888	17.0688	19.5887	22.7382	23.9191	28.1427	3.74269	2.75498	5.21846		414	23.5211	20.369	18.0554
415	22.3706	14.8709	15.7033	16.4809	17.0766	27.4351	35.8225	29.536	26.686	29.8661	24.1795	11.3403	7.44423	3.56382	4.33383	18.316	7.66702	6.65405	2.40493	1.7162	6.87607	19.3646	18.7963	11.375	27.9992	23.9141	22.2364	21.4342	31.2843	27.3969	16.6609	12.1822	4.45227	7.64249	8.67446	6.60865	17.1514	19.7098	22.7592	23.9192	28.0558	3.75727	2.76826	5.2182		415	23.4424	20.3604	18.0847
416	22.4342	14.834	15.6785	16.467	17.0344	27.4617	35.8899	29.4682	26.7398	29.8478	24.3106	11.3258	7.37367	3.54837	4.331	18.3504	7.64848	6.64074	2.39749	1.72555	6.85787	19.3878	18.7444	11.371	28.004	23.9196	22.2564	21.4172	31.2219	27.4048	16.6424	12.1249	4.47656	7.67567	8.81079	6.72889	17.2329	19.8294	22.7789	23.9193	27.9699	3.77187	2.78201	5.21701		416	23.3645	20.355	18.1138
417	22.4961	14.7967	15.6547	16.4554	16.9932	27.4936	35.9619	29.3992	26.7961	29.8289	24.4441	11.3138	7.30308	3.5328	4.32852	18.3836	7.62996	6.62424	2.38996	1.73611	6.84067	19.4078	18.6921	11.3649	28.0048	23.9248	22.275	21.4005	31.1548	27.4135	16.6238	12.0693	4.50128	7.71196	8.94423	6.84947	17.3134	19.9476	22.797	23.9192	27.8853	3.78644	2.79626	5.21479		417	23.2875	20.3525	18.1425
418	22.5561	14.7591	15.6322	16.4458	16.9527	27.5308	36.0383	29.3291	26.8549	29.8095	24.5795	11.3043	7.2326	3.51718	4.32639	18.4156	7.61145	6.60451	2.3824	1.74791	6.82457	19.4243	18.6396	11.3567	28.0019	23.9296	22.2923	21.384	31.0829	27.4229	16.6049	12.0154	4.52632	7.75134	9.07463	6.97026	17.3931	20.0643	22.8136	23.9187	27.802	3.80095	2.81102	5.21146		418	23.2113	20.353	18.1706
419	22.6141	14.7212	15.611	16.4382	16.9131	27.5731	36.1189	29.258	26.916	29.7896	24.7166	11.2974	7.16238	3.50155	4.32466	18.4463	7.59291	6.58155	2.37487	1.76094	6.80965	19.4376	18.5871	11.3464	27.9953	23.934	22.3082	21.3677	31.0063	27.4327	16.5859	11.9632	4.5516	7.79377	9.20181	7.09115	17.4721	20.1795	22.8284	23.9179	27.7203	3.81538	2.82631	5.20696		419	23.136	20.3563	18.198
420	22.67	14.6831	15.5914	16.4324	16.8742	27.6204	36.2035	29.186	26.9795	29.7693	24.8552	11.293	7.09256	3.48599	4.32334	18.4756	7.57434	6.55535	2.3674	1.77521	6.79598	19.4475	18.5345	11.3341	27.9851	23.9381	22.3226	21.3518	30.9251	27.443	16.5668	11.9128	4.577	7.83919	9.32562	7.212	17.5508	20.2931	22.8416	23.9167	27.6403	3.82969	2.84214	5.20121		420	23.0615	20.3623	18.2243
421	22.7238	14.6447	15.5733	16.4282	16.8358	27.6725	36.2917	29.1133	27.0452	29.7486	24.9948	11.2911	7.02329	3.47053	4.32246	18.5036	7.5557	6.52591	2.36006	1.79072	6.78364	19.4541	18.4821	11.3196	27.9714	23.9418	22.3356	21.3363	30.8392	27.4536	16.5475	11.8642	4.60243	7.88753	9.44591	7.33267	17.6292	20.4053	22.8529	23.915	27.5622	3.84387	2.85855	5.19413		421	22.9879	20.3709	18.2496
422	22.7753	14.6062	15.557	16.4256	16.7981	27.7292	36.3835	29.04	27.1129	29.7275	25.1351	11.2917	6.95472	3.45524	4.32205	18.5302	7.537	6.49327	2.3529	1.80748	6.7727	19.4576	18.4298	11.3029	27.9543	23.9452	22.347	21.3213	30.7489	27.4644	16.5281	11.8174	4.62781	7.93873	9.56254	7.45303	17.7076	20.5158	22.8624	23.9128	27.4862	3.85788	2.87555	5.18568		422	22.9151	20.382	18.2735
423	22.8244	14.5676	15.5425	16.4243	16.7608	27.7904	36.4785	28.9664	27.1825	29.7061	25.2759	11.2949	6.88699	3.44019	4.32213	18.5554	7.51819	6.45744	2.34598	1.82547	6.76323	19.4579	18.3779	11.2842	27.9341	23.9482	22.3569	21.3067	30.6542	27.4752	16.5086	11.7723	4.65304	7.99269	9.67539	7.57293	17.7861	20.6247	22.8699	23.91	27.4123	3.8717	2.89318	5.17577		423	22.843	20.3955	18.2959
424	22.8712	14.529	15.53	16.4243	16.7239	27.8557	36.5766	28.8926	27.2539	29.6843	25.4167	11.3005	6.82026	3.42542	4.32272	18.5793	7.49928	6.4185	2.33934	1.84468	6.75529	19.4551	18.3265	11.2633	27.9107	23.9507	22.3652	21.2928	30.5553	27.486	16.489	11.729	4.67805	8.04931	9.78432	7.69224	17.8649	20.7319	22.8755	23.9065	27.3407	3.88533	2.91146	5.16437		424	22.7717	20.4111	18.3165
425	22.9155	14.4904	15.5195	16.4253	16.6873	27.9252	36.6774	28.8187	27.327	29.6623	25.5573	11.3086	6.75466	3.411	4.32385	18.6017	7.48024	6.37648	2.33305	1.86511	6.74894	19.4493	18.2755	11.2403	27.8844	23.9529	22.3719	21.2795	30.4522	27.4966	16.4695	11.6876	4.70275	8.10849	9.88924	7.81081	17.9441	20.8374	22.879	23.9025	27.2715	3.89873	2.93042	5.15143		425	22.7011	20.4289	18.3354
426	22.9572	14.452	15.5112	16.4271	16.6509	27.9984	36.7807	28.7449	27.4015	29.64	25.6974	11.3191	6.69034	3.39698	4.32553	18.6228	7.46107	6.33148	2.32717	1.88674	6.74423	19.4406	18.2253	11.2152	27.8553	23.9546	22.377	21.2669	30.3451	27.5068	16.4499	11.648	4.72707	8.1701	9.99004	7.92849	18.0239	20.9412	22.8806	23.8977	27.2049	3.91192	2.95009	5.13689		426	22.6312	20.4485	18.3521
427	22.9964	14.4137	15.505	16.4297	16.6147	28.0753	36.8863	28.6716	27.4775	29.6174	25.8365	11.3321	6.62744	3.38343	4.32778	18.6424	7.44175	6.28357	2.32173	1.90954	6.7412	19.429	18.1758	11.188	27.8234	23.9559	22.3805	21.2551	30.2342	27.5166	16.4304	11.6102	4.75094	8.23402	10.0866	8.04513	18.1046	21.043	22.88	23.8922	27.1408	3.92486	2.97051	5.12073		427	22.5619	20.4699	18.3667
428	23.0329	14.3757	15.5012	16.4329	16.5786	28.1555	36.9939	28.5988	27.5546	29.5946	25.9744	11.3475	6.56609	3.3704	4.33062	18.6607	7.42226	6.23286	2.3168	1.93348	6.73991	19.4148	18.1271	11.1588	27.7891	23.9567	22.3822	21.2442	30.1197	27.5258	16.4109	11.5742	4.77431	8.30011	10.1789	8.16059	18.1862	21.143	22.8774	23.8861	27.0793	3.93757	2.99172	5.10292		428	22.4932	20.493	18.3789
429	23.0669	14.338	15.4996	16.4364	16.5425	28.2389	37.1033	28.5267	27.6329	29.5716	26.1107	11.3652	6.50643	3.35795	4.33407	18.6775	7.40261	6.17946	2.31243	1.95855	6.74039	19.398	18.0794	11.1274	27.7523	23.9569	22.3823	21.2342	30.0017	27.5344	16.3916	11.5402	4.7971	8.36822	10.2669	8.27473	18.2689	21.241	22.8728	23.8793	27.0206	3.95003	3.01374	5.08342		429	22.425	20.5175	18.3886
430	23.0982	14.3007	15.5004	16.4401	16.5064	28.3253	37.2141	28.4556	27.712	29.5483	26.2452	11.3853	6.44857	3.34613	4.33814	18.6931	7.38278	6.12349	2.30867	1.98471	6.74266	19.3786	18.0328	11.094	27.7133	23.9566	22.3806	21.2252	29.8804	27.5421	16.3724	11.508	4.81928	8.43821	10.3505	8.38739	18.3528	21.3368	22.866	23.8717	26.9648	3.96226	3.03662	5.06222		430	22.3572	20.5433	18.3956
431	23.127	14.2639	15.5036	16.4438	16.4702	28.4144	37.3261	28.3857	27.792	29.5249	26.3775	11.4076	6.39265	3.335	4.34286	18.7072	7.36277	6.06509	2.30556	2.01192	6.74675	19.3569	17.9873	11.0586	27.6721	23.9557	22.3773	21.2174	29.7561	27.5488	16.3534	11.4777	4.8408	8.50991	10.4296	8.49843	18.4381	21.4305	22.8572	23.8636	26.9117	3.97425	3.06038	5.03932		431	22.2899	20.5703	18.3998
432	23.1531	14.2276	15.5093	16.4475	16.4338	28.5059	37.4392	28.3172	27.8725	29.5012	26.5073	11.4322	6.33879	3.3246	4.34822	18.7201	7.34258	6.00441	2.30315	2.04015	6.75267	19.333	17.9431	11.0212	27.629	23.9542	22.3722	21.2107	29.629	27.5545	16.3347	11.4493	4.86162	8.58316	10.5042	8.60772	18.5249	21.5219	22.8464	23.8548	26.8616	3.98601	3.08507	5.01469		432	22.2229	20.5983	18.401
433	23.1766	14.1921	15.5173	16.4508	16.3972	28.5997	37.5529	28.2503	27.9536	29.4773	26.6344	11.459	6.28709	3.315	4.35425	18.7316	7.3222	5.94159	2.30148	2.06934	6.76044	19.3069	17.9002	10.9819	27.584	23.952	22.3654	21.2053	29.4992	27.5589	16.3163	11.4228	4.8817	8.65779	10.5744	8.71511	18.6133	21.611	22.8335	23.8454	26.8143	3.99756	3.11071	4.98835		433	22.1561	20.6272	18.3992
434	23.1977	14.1572	15.5278	16.4537	16.3603	28.6955	37.6671	28.1852	28.0349	29.4532	26.7583	11.488	6.23767	3.30623	4.36096	18.7419	7.30165	5.87682	2.3006	2.09947	6.77007	19.2788	17.8588	10.9406	27.5372	23.9491	22.3569	21.2012	29.3671	27.5621	16.2983	11.3984	4.90103	8.73363	10.64	8.82048	18.7034	21.6976	22.8187	23.8355	26.77	4.0089	3.13735	4.9603		434	22.0895	20.6568	18.3942
435	23.2163	14.1232	15.5407	16.456	16.3231	28.7932	37.7815	28.1221	28.1164	29.4289	26.879	11.519	6.19062	3.29834	4.36836	18.751	7.28091	5.81025	2.30054	2.13047	6.78153	19.2488	17.8189	10.8974	27.4889	23.9454	22.3467	21.1985	29.2329	27.5638	16.2806	11.3759	4.91957	8.8105	10.7012	8.92368	18.7954	21.7816	22.8019	23.8251	26.7286	4.02006	3.16501	4.93055		435	22.023	20.6869	18.386
436	23.2325	14.0902	15.556	16.4576	16.2855	28.8924	37.8959	28.0611	28.198	29.4043	26.996	11.5521	6.14604	3.29137	4.37647	18.7588	7.26	5.74207	2.30133	2.1623	6.79484	19.2172	17.7806	10.8524	27.4392	23.941	22.3348	21.1974	29.0968	27.5639	16.2634	11.3554	4.93732	8.88821	10.7579	9.02459	18.8893	21.8629	22.7832	23.8143	26.6902	4.03105	3.19373	4.89913		436	21.9566	20.7174	18.3743
437	23.2463	14.0581	15.5736	16.4582	16.2474	28.9929	38.01	28.0025	28.2795	29.3794	27.1091	11.5871	6.10401	3.28536	4.38529	18.7655	7.23892	5.67247	2.30301	2.1949	6.80996	19.1839	17.744	10.8056	27.388	23.9356	22.3211	21.1978	28.9591	27.5624	16.2467	11.3369	4.95427	8.9666	10.8102	9.1231	18.9852	21.9413	22.7627	23.8032	26.6547	4.0419	3.22353	4.86607		437	21.8902	20.7482	18.3592
438	23.258	14.0271	15.5935	16.4577	16.2089	29.0946	38.1235	27.9464	28.3607	29.3542	27.2181	11.624	6.06463	3.28034	4.39483	18.771	7.21769	5.60165	2.30561	2.22821	6.82688	19.1491	17.7091	10.757	27.3357	23.9294	22.3059	21.1998	28.82	27.5591	16.2305	11.3206	4.97042	9.04548	10.8581	9.21909	19.0831	22.0169	22.7405	23.7917	26.622	4.05264	3.25444	4.83138		438	21.8236	20.7792	18.3405
439	23.2675	13.9973	15.6156	16.4561	16.17	29.1971	38.2364	27.893	28.4416	29.3288	27.3228	11.6628	6.02796	3.27636	4.40511	18.7754	7.19631	5.52981	2.30916	2.26218	6.84558	19.113	17.6761	10.7067	27.2823	23.9222	22.289	21.2036	28.6799	27.554	16.2149	11.3063	4.98576	9.12466	10.9017	9.31244	19.1832	22.0894	22.7165	23.7801	26.5923	4.06328	3.28648	4.79512		439	21.7569	20.8101	18.3183
440	23.275	13.9687	15.6399	16.453	16.1305	29.3004	38.3482	27.8425	28.5219	29.3029	27.423	11.7033	5.99407	3.27342	4.41613	18.7787	7.17479	5.45715	2.31367	2.29674	6.866	19.0756	17.6449	10.6548	27.2278	23.9141	22.2704	21.2091	28.5389	27.5469	16.2	11.2942	5.00031	9.20397	10.941	9.40307	19.2854	22.1587	22.691	23.7684	26.5654	4.07387	3.31968	4.75733		440	21.69	20.8408	18.2924
441	23.2807	13.9415	15.6662	16.4485	16.0904	29.4042	38.4588	27.7949	28.6017	29.2767	27.5184	11.7455	5.96302	3.27157	4.42791	18.7809	7.15315	5.38388	2.31916	2.33182	6.88812	19.0372	17.6156	10.6013	27.1725	23.9049	22.2503	21.2165	28.3975	27.5378	16.1857	11.2842	5.01408	9.28322	10.9761	9.49086	19.3898	22.2247	22.6639	23.7567	26.5414	4.08442	3.35404	4.71805		441	21.6227	20.8713	18.2628
442	23.2846	13.9156	15.6944	16.4424	16.0498	29.5082	38.568	27.7504	28.6806	29.2501	27.6088	11.7894	5.93487	3.27081	4.44045	18.7822	7.13141	5.31022	2.32565	2.36737	6.91188	18.9977	17.5883	10.5463	27.1164	23.8946	22.2287	21.2258	28.2557	27.5266	16.1721	11.2764	5.02708	9.36226	11.0071	9.57575	19.4965	22.2873	22.6354	23.7451	26.5201	4.09498	3.38959	4.67734		442	21.555	20.9014	18.2296
443	23.2869	13.8913	15.7245	16.4346	16.0087	29.6123	38.6756	27.7091	28.7587	29.223	27.6942	11.8347	5.90966	3.27117	4.45376	18.7824	7.10958	5.23638	2.33315	2.40331	6.93724	18.9574	17.563	10.4898	27.0597	23.8832	22.2056	21.237	28.1139	27.5133	16.1594	11.2709	5.03935	9.44089	11.0341	9.65763	19.6053	22.3463	22.6056	23.7337	26.5015	4.10558	3.42633	4.63527		443	21.4868	20.931	18.1926
444	23.2877	13.8685	15.7564	16.4249	15.9669	29.7164	38.7813	27.671	28.8358	29.1954	27.7743	11.8815	5.88743	3.27265	4.46785	18.7817	7.08767	5.16257	2.34167	2.43957	6.96413	18.9164	17.5397	10.432	27.0023	23.8707	22.181	21.2502	27.9725	27.4977	16.1474	11.2676	5.05091	9.51896	11.0572	9.73646	19.7164	22.4017	22.5745	23.7226	26.4855	4.11625	3.46426	4.5919		444	21.4182	20.9599	18.1519
445	23.2873	13.8473	15.7898	16.4132	15.9245	29.8201	38.885	27.6363	28.9118	29.1672	27.849	11.9296	5.86821	3.27526	4.48274	18.7801	7.06572	5.08902	2.3512	2.47609	6.99251	18.8747	17.5185	10.3728	26.9444	23.8569	22.1551	21.2655	27.8315	27.4799	16.1362	11.2667	5.06178	9.59631	11.0765	9.81215	19.8296	22.4533	22.5423	23.7119	26.4721	4.12704	3.50339	4.5473		445	21.3489	20.9881	18.1075
446	23.2857	13.8277	15.8247	16.3995	15.8815	29.9234	38.9865	27.6051	28.9867	29.1385	27.9182	11.979	5.85202	3.27901	4.49843	18.7777	7.04373	5.01594	2.36176	2.51278	7.0223	18.8324	17.4994	10.3124	26.8861	23.842	22.1278	21.2828	27.6914	27.4598	16.1259	11.268	5.07201	9.67279	11.0922	9.88466	19.945	22.501	22.5091	23.7017	26.4613	4.13797	3.5437	4.50154		446	21.279	21.0154	18.0594
447	23.2832	13.8099	15.8609	16.3836	15.838	30.0261	39.0855	27.5772	29.0602	29.1091	27.9818	12.0295	5.83889	3.28389	4.51492	18.7743	7.02172	4.94353	2.37333	2.54957	7.05343	18.7897	17.4824	10.2508	26.8275	23.8258	22.0993	21.3023	27.5523	27.4373	16.1165	11.2718	5.08164	9.74824	11.1044	9.95395	20.0625	22.5447	22.475	23.6922	26.4529	4.1491	3.58518	4.45471		447	21.2083	21.0418	18.0077
448	23.2799	13.7938	15.8983	16.3654	15.7938	30.128	39.182	27.5529	29.1324	29.0791	28.0398	12.0811	5.82882	3.2899	4.53224	18.7702	6.99973	4.87202	2.38591	2.5864	7.08584	18.7467	17.4674	10.1882	26.7686	23.8083	22.0696	21.3238	27.4145	27.4125	16.1079	11.2779	5.09069	9.82253	11.1132	10.02	20.1821	22.5843	22.4402	23.6834	26.4468	4.16044	3.62782	4.40688		448	21.1369	21.0672	17.9524
449	23.2759	13.7796	15.9366	16.345	15.7491	30.2289	39.2758	27.5319	29.2031	29.0483	28.092	12.1337	5.82181	3.29702	4.55038	18.7653	6.97776	4.80161	2.39948	2.62319	7.11944	18.7033	17.4545	10.1246	26.7095	23.7896	22.0388	21.3475	27.2783	27.3854	16.1003	11.2865	5.09922	9.89553	11.1188	10.0827	20.3036	22.6196	22.4047	23.6755	26.4431	4.17205	3.6716	4.35814		449	21.0647	21.0914	17.8936
450	23.2716	13.7671	15.9758	16.3221	15.7038	30.3287	39.3667	27.5145	29.2723	29.0168	28.1385	12.1871	5.81786	3.30524	4.56937	18.7597	6.95584	4.7325	2.41404	2.65985	7.15417	18.6598	17.4437	10.06	26.6502	23.7696	22.0069	21.3733	27.1438	27.3559	16.0936	11.2976	5.10727	9.96712	11.1213	10.1421	20.427	22.6507	22.3688	23.6685	26.4415	4.18396	3.71648	4.30858		450	20.9916	21.1143	17.8314
451	23.267	13.7565	16.0156	16.2968	15.658	30.4272	39.4545	27.5004	29.3398	28.9844	28.1791	12.2413	5.81696	3.31455	4.5892	18.7534	6.93399	4.66489	2.42957	2.69633	7.18995	18.6161	17.435	9.99472	26.5909	23.7482	21.9742	21.4012	27.0114	27.324	16.0879	11.3111	5.11489	10.0372	11.1209	10.1982	20.5522	22.6774	22.3325	23.6626	26.442	4.19621	3.76242	4.25829		451	20.9176	21.136	17.7659
452	23.2624	13.7478	16.056	16.2689	15.6117	30.5243	39.5392	27.4897	29.4058	28.9512	28.214	12.296	5.81909	3.32491	4.60989	18.7464	6.91223	4.59898	2.44603	2.73254	7.22669	18.5723	17.4283	9.92869	26.5316	23.7256	21.9405	21.4313	26.8812	27.2899	16.083	11.3271	5.12213	10.1056	11.1178	10.251	20.6791	22.6996	22.2959	23.6579	26.4446	4.20884	3.80939	4.20737		452	20.8427	21.1563	17.6972
453	23.258	13.741	16.0966	16.2385	15.5649	30.62	39.6206	27.4822	29.4699	28.9172	28.2431	12.3513	5.82423	3.3363	4.63145	18.7388	6.89058	4.53495	2.46341	2.76841	7.26432	18.5286	17.4235	9.86205	26.4723	23.7017	21.9061	21.4634	26.7535	27.2535	16.0791	11.3456	5.12904	10.1724	11.1121	10.3005	20.8075	22.7173	22.2593	23.6544	26.4491	4.22187	3.85733	4.15591		453	20.7668	21.1752	17.6253
454	23.2538	13.7361	16.1374	16.2055	15.5176	30.7139	39.6985	27.4779	29.5323	28.8821	28.2665	12.407	5.83235	3.34869	4.65389	18.7306	6.86907	4.47298	2.48169	2.80386	7.30276	18.4849	17.4207	9.7949	26.4132	23.6764	21.8711	21.4975	26.6284	27.215	16.0762	11.3667	5.13566	10.2374	11.104	10.3467	20.9372	22.7303	22.2228	23.6522	26.4555	4.23534	3.9062	4.10401		454	20.69	21.1926	17.5505
455	23.2501	13.733	16.1781	16.1699	15.47	30.8061	39.773	27.4766	29.5929	28.8461	28.2842	12.463	5.84341	3.36205	4.67721	18.7219	6.84771	4.41324	2.50081	2.83883	7.34193	18.4412	17.4198	9.72736	26.3542	23.65	21.8355	21.5337	26.5061	27.1742	16.0741	11.3903	5.14205	10.3005	11.0937	10.3896	21.0683	22.7387	22.1864	23.6515	26.4636	4.24929	3.95592	4.05177		455	20.6121	21.2084	17.4728
456	23.2471	13.7319	16.2185	16.1316	15.4219	30.8965	39.8438	27.4782	29.6517	28.8091	28.2962	12.5192	5.85736	3.37634	4.70143	18.7127	6.82651	4.35589	2.52077	2.87325	7.38175	18.3977	17.4208	9.65951	26.2953	23.6222	21.7994	21.5719	26.3869	27.1314	16.0729	11.4165	5.14826	10.3617	11.0813	10.4293	21.2004	22.7424	22.1505	23.6523	26.4734	4.26375	4.00644	3.99928		456	20.5332	21.2226	17.3925
457	23.245	13.7325	16.2585	16.0906	15.3735	30.9848	39.911	27.4825	29.7085	28.7711	28.3028	12.5754	5.87417	3.39152	4.72656	18.7031	6.8055	4.30109	2.54151	2.90704	7.42214	18.3544	17.4235	9.59147	26.2367	23.5933	21.7629	21.6119	26.2708	27.0866	16.0725	11.4452	5.15434	10.421	11.0671	10.4658	21.3333	22.7414	22.115	23.6546	26.4847	4.27874	4.05767	3.94665		457	20.4532	21.2352	17.3097
458	23.2438	13.735	16.2979	16.047	15.3249	31.071	39.9743	27.4895	29.7634	28.7319	28.304	12.6315	5.89378	3.40755	4.75261	18.6931	6.7847	4.24898	2.56299	2.94013	7.46304	18.3112	17.4279	9.52336	26.1784	23.5631	21.7262	21.6538	26.1581	27.0399	16.073	11.4764	5.16034	10.4784	11.0512	10.4991	21.467	22.7356	22.0802	23.6586	26.4975	4.29428	4.10953	3.89397		458	20.3723	21.246	17.2245
459	23.2439	13.7392	16.3365	16.0007	15.276	31.155	40.0338	27.4988	29.8164	28.6917	28.2998	12.6874	5.91613	3.42437	4.77957	18.6827	6.76412	4.19969	2.58519	2.97248	7.50437	18.2682	17.434	9.45527	26.1205	23.5319	21.6893	21.6974	26.0488	26.9914	16.0743	11.5102	5.16631	10.5338	11.0338	10.5294	21.6012	22.725	22.0462	23.6642	26.5117	4.31041	4.16194	3.84135		459	20.2903	21.2552	17.1372
460	23.2452	13.7452	16.3741	15.9517	15.2269	31.2368	40.0893	27.5102	29.8675	28.6504	28.2905	12.743	5.94116	3.44195	4.80747	18.6721	6.74377	4.15335	2.60804	3.004	7.54605	18.2255	17.4416	9.38733	26.0629	23.4995	21.6524	21.7427	25.9431	26.9411	16.0763	11.5464	5.17229	10.5872	11.0151	10.5567	21.7357	22.7097	22.0132	23.6716	26.5271	4.32714	4.2148	3.78888		460	20.2073	21.2625	17.0479
461	23.248	13.7528	16.4105	15.9002	15.1777	31.3161	40.1409	27.5237	29.9166	28.608	28.2762	12.7981	5.9688	3.46023	4.83631	18.6612	6.72367	4.11008	2.63151	3.03464	7.58803	18.183	17.4507	9.31965	26.0056	23.4661	21.6155	21.7895	25.841	26.8894	16.079	11.5851	5.17835	10.6387	10.9953	10.581	21.8703	22.6897	21.9812	23.6806	26.5437	4.34448	4.26802	3.73666		461	20.1233	21.268	16.9569
462	23.2524	13.7621	16.4456	15.846	15.1284	31.393	40.1885	27.5388	29.9638	28.5644	28.2571	12.8527	5.99898	3.47917	4.8661	18.6501	6.70384	4.06996	2.65555	3.06435	7.63025	18.1407	17.4612	9.25234	25.9489	23.4318	21.5787	21.8378	25.7428	26.8361	16.0823	11.6262	5.18452	10.6883	10.9745	10.6024	22.0048	22.6649	21.9505	23.6915	26.5615	4.36246	4.32149	3.68479		462	20.0384	21.2717	16.8643
463	23.2585	13.7729	16.4792	15.7892	15.0791	31.4674	40.2319	27.5555	30.009	28.5197	28.2334	12.9065	6.03163	3.4987	4.89684	18.6389	6.68427	4.03309	2.6801	3.09307	7.67263	18.0987	17.473	9.18551	25.8926	23.3966	21.5423	21.8875	25.6485	26.7816	16.0863	11.6698	5.19084	10.7361	10.9529	10.6211	22.1388	22.6354	21.9212	23.7041	26.5802	4.38108	4.37509	3.63335		463	19.9525	21.2735	16.7704
464	23.2665	13.7851	16.5111	15.73	15.0299	31.5392	40.2713	27.5733	30.0523	28.4739	28.2052	12.9595	6.06666	3.51879	4.92853	18.6276	6.66498	3.99955	2.70513	3.12074	7.71514	18.0569	17.486	9.11928	25.8368	23.3605	21.5062	21.9384	25.5581	26.7259	16.0908	11.7156	5.19737	10.782	10.9307	10.637	22.2723	22.6013	21.8934	23.7185	26.5998	4.40035	4.42873	3.58245		464	19.8657	21.2734	16.6754
465	23.2763	13.7988	16.5412	15.6683	14.9808	31.6084	40.3065	27.5921	30.0937	28.427	28.1728	13.0116	6.10399	3.53938	4.96119	18.6163	6.64598	3.96941	2.73057	3.14733	7.75772	18.0154	17.5002	9.05377	25.7816	23.3237	21.4705	21.9904	25.4716	26.6692	16.0958	11.7637	5.20413	10.8262	10.9081	10.6504	22.4049	22.5627	21.8673	23.7346	26.6203	4.42028	4.48227	3.53217		465	19.7781	21.2715	16.5795
466	23.2882	13.8137	16.5693	15.6042	14.9319	31.6747	40.3376	27.6116	30.1331	28.3789	28.1363	13.0626	6.14353	3.56041	4.99481	18.6051	6.62728	3.94271	2.75638	3.17278	7.80032	17.9741	17.5153	8.98909	25.7269	23.2863	21.4354	22.0434	25.3892	26.6116	16.1012	11.8141	5.21118	10.8687	10.8852	10.6612	22.5363	22.5195	21.8429	23.7525	26.6414	4.44086	4.5356	3.4826		466	19.6898	21.2676	16.4829
467	23.3021	13.8298	16.5953	15.5378	14.8832	31.7383	40.3645	27.6315	30.1708	28.3299	28.0961	13.1124	6.1852	3.58183	5.02939	18.5941	6.60888	3.9195	2.78249	3.19705	7.84291	17.933	17.5314	8.92535	25.6729	23.2483	21.401	22.0973	25.3109	26.5532	16.1069	11.8666	5.21855	10.9097	10.8622	10.6696	22.6664	22.4719	21.8205	23.772	26.6632	4.46209	4.58859	3.43381		467	19.6006	21.2618	16.3859
468	23.3182	13.8471	16.6189	15.4691	14.8349	31.7991	40.3873	27.6514	30.2066	28.2797	28.0523	13.1609	6.2289	3.60359	5.06494	18.5833	6.59078	3.8998	2.80887	3.22012	7.88544	17.8922	17.5482	8.86266	25.6195	23.2098	21.3673	22.1519	25.2367	26.4944	16.1129	11.9211	5.22627	10.9493	10.8393	10.6757	22.7949	22.4201	21.8001	23.7931	26.6855	4.48396	4.6411	3.3859		468	19.5108	21.254	16.2886
469	23.3365	13.8653	16.6402	15.3983	14.7869	31.857	40.4058	27.6712	30.2406	28.2286	28.0052	13.2079	6.27454	3.62565	5.10145	18.5727	6.57299	3.88364	2.83544	3.24195	7.9279	17.8515	17.5658	8.80114	25.5668	23.171	21.3345	22.2071	25.1665	26.4351	16.1191	11.9776	5.23438	10.9875	10.8165	10.6796	22.9214	22.364	21.7819	23.8158	26.7083	4.50646	4.69302	3.33894		469	19.4205	21.2444	16.1914
470	23.3569	13.8845	16.659	15.3254	14.7395	31.9119	40.4201	27.6905	30.2729	28.1765	27.955	13.2534	6.32202	3.64795	5.13892	18.5625	6.5555	3.87102	2.86217	3.2625	7.97025	17.8111	17.5841	8.74089	25.5149	23.1319	21.3026	22.2627	25.1004	26.3756	16.1255	12.0359	5.2429	11.0245	10.7941	10.6814	23.0459	22.3039	21.7659	23.84	26.7314	4.52959	4.74419	3.29299		470	19.3296	21.2327	16.0943
471	23.3796	13.9044	16.6751	15.2506	14.6926	31.9638	40.4303	27.709	30.3035	28.1235	27.902	13.2973	6.37124	3.67045	5.17734	18.5528	6.53833	3.86192	2.88899	3.28176	8.01248	17.7709	17.6028	8.68202	25.4637	23.0927	21.2716	22.3186	25.0384	26.3161	16.1319	12.096	5.25188	11.0605	10.7722	10.6812	23.1679	22.2398	21.7523	23.8656	26.7548	4.55331	4.7945	3.24814		471	19.2382	21.2192	15.9978
472	23.4046	13.925	16.6885	15.1739	14.6463	32.0128	40.4363	27.7265	30.3325	28.0697	27.8464	13.3394	6.42209	3.69309	5.2167	18.5436	6.52145	3.85634	2.91585	3.2997	8.05457	17.7308	17.6219	8.62463	25.4133	23.0535	21.2418	22.3746	24.9803	26.2567	16.1384	12.1578	5.26132	11.0955	10.751	10.6792	23.2872	22.1719	21.7412	23.8924	26.7784	4.57761	4.8438	3.20443		472	19.1466	21.2036	15.9019
473	23.4317	13.9462	16.699	15.0955	14.6007	32.0586	40.4381	27.7426	30.3599	28.0151	27.7886	13.3796	6.47448	3.71585	5.25699	18.535	6.50489	3.85424	2.94271	3.31631	8.09652	17.6909	17.6414	8.56882	25.3638	23.0143	21.2131	22.4306	24.9262	26.1975	16.1447	12.2211	5.27127	11.1298	10.7304	10.6754	23.4036	22.1003	21.7327	23.9205	26.802	4.60245	4.89195	3.16195		473	19.0546	21.1862	15.8069
474	23.4611	13.9679	16.7067	15.0154	14.5559	32.1014	40.4358	27.757	30.3858	27.9598	27.7287	13.4179	6.5283	3.73867	5.2982	18.5271	6.48862	3.85558	2.9695	3.33159	8.13831	17.6511	17.6611	8.5147	25.3152	22.9754	21.1855	22.4865	24.876	26.1387	16.1509	12.2857	5.28174	11.1635	10.7108	10.6699	23.5169	22.0253	21.7268	23.9496	26.8257	4.62782	4.93882	3.12072		474	18.9626	21.1668	15.713
475	23.4925	13.99	16.7113	14.9339	14.5119	32.1411	40.4293	27.7695	30.4102	27.9039	27.6671	13.4541	6.58345	3.76152	5.34031	18.52	6.47265	3.8603	2.99617	3.34552	8.17995	17.6115	17.6809	8.46236	25.2675	22.9368	21.1592	22.5421	24.8297	26.0806	16.1569	12.3516	5.29275	11.1967	10.6921	10.663	23.6267	21.947	21.7235	23.9796	26.8493	4.65368	4.98428	3.08082		475	18.8705	21.1454	15.6204
476	23.5261	14.0123	16.7129	14.8509	14.4689	32.1777	40.4187	27.7798	30.4332	27.8475	27.6039	13.4881	6.6398	3.78437	5.3833	18.5138	6.45697	3.86834	3.02269	3.3581	8.22144	17.572	17.7008	8.41188	25.2207	22.8987	21.1343	22.5973	24.7871	26.0231	16.1627	12.4187	5.30432	11.2297	10.6745	10.6546	23.7329	21.8655	21.7231	24.0104	26.8727	4.67998	5.02818	3.04228		476	18.7784	21.1221	15.5293
477	23.5617	14.0347	16.7113	14.7668	14.4269	32.2111	40.404	27.7876	30.4549	27.7907	27.5395	13.5199	6.69727	3.80718	5.42716	18.5085	6.44157	3.87962	3.04899	3.36933	8.2628	17.5327	17.7206	8.36335	25.1749	22.8611	21.1106	22.6518	24.7481	25.9666	16.1681	12.4867	5.31646	11.2626	10.6581	10.6449	23.8351	21.7811	21.7255	24.0419	26.8958	4.7067	5.0704	3.00515		477	18.6866	21.0969	15.4399
478	23.5993	14.0572	16.7066	14.6815	14.386	32.2413	40.3851	27.7926	30.4754	27.7335	27.4741	13.5495	6.75573	3.82993	5.47185	18.5043	6.42645	3.89407	3.07504	3.37923	8.30403	17.4935	17.7403	8.31687	25.1302	22.8242	21.0884	22.7056	24.7128	25.911	16.1731	12.5555	5.32921	11.2957	10.643	10.634	23.9333	21.6939	21.7308	24.0739	26.9187	4.73378	5.1108	2.96946		478	18.595	21.0698	15.3524
479	23.6386	14.0797	16.6987	14.5953	14.3462	32.2684	40.3623	27.7948	30.4946	27.6761	27.4079	13.5766	6.81509	3.8526	5.51734	18.5012	6.41159	3.91157	3.10079	3.38781	8.34515	17.4545	17.7598	8.2725	25.0866	22.7882	21.0676	22.7586	24.6809	25.8566	16.1776	12.625	5.34255	11.329	10.6292	10.6221	24.027	21.6041	21.7389	24.1062	26.9411	4.76118	5.14927	2.93523		479	18.5039	21.0407	15.2669
480	23.6797	14.102	16.6876	14.5083	14.3077	32.2922	40.3353	27.7937	30.5128	27.6185	27.3412	13.6013	6.87522	3.87515	5.56361	18.4994	6.397	3.93204	3.1262	3.39507	8.38619	17.4156	17.7791	8.23032	25.0441	22.7531	21.0482	22.8106	24.6524	25.8036	16.1817	12.695	5.35652	11.3627	10.6169	10.6092	24.1162	21.512	21.7501	24.1387	26.963	4.78885	5.18567	2.90251		480	18.4133	21.0098	15.1836
481	23.7225	14.1241	16.6733	14.4207	14.2705	32.313	40.3044	27.7891	30.5299	27.561	27.2743	13.6234	6.93603	3.89758	5.61062	18.4989	6.38265	3.95535	3.15123	3.40105	8.42716	17.3768	17.798	8.1904	25.0027	22.7191	21.0302	22.8615	24.6271	25.7519	16.1852	12.7654	5.37111	11.3971	10.6061	10.5955	24.2007	21.4178	21.7641	24.1712	26.9844	4.81674	5.21989	2.8713		481	18.3233	20.9769	15.1027
482	23.7667	14.1458	16.6557	14.3325	14.2348	32.3305	40.2695	27.781	30.5461	27.5036	27.2073	13.643	6.99739	3.91987	5.65833	18.4997	6.36855	3.98139	3.17584	3.40577	8.4681	17.3382	17.8165	8.1528	24.9625	22.6864	21.0138	22.9112	24.605	25.7017	16.1881	12.8359	5.38635	11.4324	10.5968	10.5811	24.2802	21.3216	21.7811	24.2035	27.0051	4.84479	5.25182	2.84162		482	18.2342	20.9422	15.0242
483	23.8123	14.1672	16.6349	14.244	14.2005	32.3449	40.2305	27.7691	30.5614	27.4464	27.1405	13.66	7.05921	3.94202	5.7067	18.5021	6.35468	4.01002	3.19999	3.40925	8.50902	17.2998	17.8345	8.11758	24.9236	22.6549	20.9988	22.9595	24.5859	25.6532	16.1903	12.9064	5.40222	11.4686	10.5892	10.566	24.3546	21.2237	21.801	24.2355	27.0251	4.87296	5.28135	2.81348		483	18.1461	20.9056	14.9484
484	23.8591	14.1882	16.6109	14.1553	14.1677	32.3561	40.1877	27.7532	30.5759	27.3896	27.0741	13.6743	7.12138	3.96401	5.75568	18.506	6.34103	4.04111	3.22367	3.41154	8.54997	17.2615	17.852	8.08479	24.8859	22.6249	20.9852	23.0064	24.5696	25.6064	16.192	12.9767	5.41875	11.506	10.5833	10.5505	24.4237	21.1243	21.8239	24.2669	27.0443	4.90117	5.30837	2.78689		484	18.059	20.8671	14.8752
485	23.9069	14.2086	16.5837	14.0665	14.1366	32.3642	40.1409	27.7332	30.5897	27.3333	27.0082	13.686	7.18378	3.98584	5.80523	18.5115	6.3276	4.07451	3.24683	3.41266	8.59096	17.2235	17.8689	8.05449	24.8495	22.5964	20.9731	23.0517	24.5561	25.5614	16.1929	13.0467	5.43593	11.5448	10.579	10.5345	24.4873	21.0235	21.8497	24.2976	27.0626	4.92938	5.3328	2.76184		485	17.9731	20.8268	14.8049
486	23.9556	14.2284	16.5534	13.9779	14.1072	32.3691	40.0902	27.7089	30.6028	27.2776	26.9432	13.6949	7.24631	4.00751	5.85528	18.5188	6.31436	4.11008	3.26946	3.41265	8.63204	17.1857	17.8852	8.02672	24.8145	22.5697	20.9625	23.0955	24.5452	25.5183	16.1931	13.1161	5.45378	11.5851	10.5765	10.5182	24.5454	20.9217	21.8783	24.3275	27.08	4.95751	5.35454	2.73833		486	17.8885	20.7846	14.7375
487	24.005	14.2477	16.52	13.8895	14.0796	32.371	40.0356	27.6803	30.6153	27.2227	26.8791	13.7011	7.30887	4.02903	5.90579	18.5278	6.30132	4.14766	3.29152	3.41157	8.67322	17.1482	17.9009	8.00151	24.7808	22.5447	20.9533	23.1375	24.5367	25.4772	16.1927	13.1849	5.47229	11.627	10.5757	10.5018	24.5978	20.819	21.9097	24.3563	27.0964	4.98551	5.37352	2.71635		487	17.8055	20.7405	14.6731
488	24.055	14.2663	16.4836	13.8016	14.0538	32.3699	39.9772	27.6473	30.6273	27.1686	26.8161	13.7045	7.37136	4.05041	5.95669	18.5386	6.28845	4.18708	3.31301	3.40946	8.71456	17.111	17.9159	7.97889	24.7486	22.5216	20.9455	23.1778	24.5305	25.438	16.1915	13.2528	5.49146	11.6708	10.5766	10.4852	24.6444	20.7156	21.9438	24.3838	27.1117	5.01332	5.38965	2.69589		488	17.7241	20.6947	14.6116
489	24.1054	14.2843	16.4442	13.7143	14.0299	32.3657	39.915	27.6098	30.6388	27.1156	26.7543	13.7051	7.43366	4.07165	6.00792	18.5513	6.27575	4.22819	3.3339	3.40636	8.75606	17.0741	17.9302	7.9589	24.7177	22.5005	20.939	23.2162	24.5265	25.4009	16.1896	13.3196	5.5113	11.7165	10.5793	10.4687	24.685	20.6118	21.9806	24.41	27.1259	5.04087	5.40289	2.67691		489	17.6444	20.647	14.5533
490	24.156	14.3015	16.402	13.6277	14.0079	32.3586	39.849	27.5678	30.6499	27.0637	26.6939	13.703	7.49569	4.09277	6.05941	18.5659	6.26321	4.27081	3.35419	3.40234	8.79778	17.0375	17.9437	7.94154	24.6883	22.4815	20.9339	23.2528	24.5245	25.3658	16.187	13.3852	5.5318	11.7643	10.5838	10.4523	24.7197	20.5077	22.02	24.4346	27.1389	5.0681	5.41316	2.65941		490	17.5666	20.5975	14.4981
491	24.2066	14.3181	16.3569	13.542	13.988	32.3486	39.7792	27.5212	30.6607	27.0131	26.6351	13.6981	7.55735	4.11378	6.11109	18.5826	6.25082	4.31476	3.37386	3.39744	8.83972	17.0014	17.9565	7.92685	24.6604	22.4646	20.9301	23.2874	24.5243	25.3328	16.1837	13.4495	5.55298	11.8143	10.59	10.4361	24.7484	20.4035	22.0619	24.4574	27.1507	5.09494	5.42043	2.64334		491	17.4909	20.5463	14.4459
492	24.257	14.334	16.3091	13.4574	13.9702	32.3357	39.7057	27.4701	30.6712	26.9639	26.5779	13.6905	7.61853	4.13471	6.16288	18.6012	6.23857	4.35989	3.39291	3.39172	8.88193	16.9657	17.9685	7.91482	24.6339	22.4501	20.9275	23.32	24.5259	25.302	16.1797	13.5122	5.57481	11.8666	10.598	10.4202	24.7709	20.2994	22.1062	24.4784	27.1611	5.12133	5.42465	2.62868		492	17.4174	20.4932	14.397
493	24.3071	14.3492	16.2587	13.3739	13.9545	32.32	39.6286	27.4145	30.6814	26.9162	26.5223	13.6802	7.67916	4.15556	6.21471	18.6219	6.22644	4.406	3.41134	3.38525	8.92442	16.9306	17.9797	7.90547	24.609	22.4379	20.9261	23.3507	24.529	25.2732	16.1751	13.5732	5.59731	11.9213	10.6076	10.4047	24.7873	20.1957	22.1528	24.4974	27.1702	5.14721	5.4258	2.61538		493	17.3461	20.4383	14.3511
494	24.3567	14.3638	16.2059	13.2918	13.9411	32.3015	39.5478	27.3545	30.6915	26.8702	26.4685	13.6671	7.73913	4.17637	6.2665	18.6446	6.21444	4.45292	3.42915	3.37808	8.96721	16.8959	17.9902	7.89878	24.5856	22.4281	20.9259	23.3793	24.5336	25.2466	16.1699	13.6324	5.62047	11.9785	10.619	10.3897	24.7976	20.0925	22.2016	24.5143	27.178	5.17252	5.42386	2.60342		494	17.2772	20.3817	14.3083
495	24.4056	14.3778	16.1506	13.2111	13.9299	32.2804	39.4634	27.29	30.7014	26.8259	26.4166	13.6514	7.79837	4.19716	6.31817	18.6694	6.20254	4.50047	3.44635	3.37027	9.01032	16.8619	17.9999	7.89477	24.5637	22.4208	20.9268	23.406	24.5394	25.222	16.1642	13.6895	5.64429	12.0383	10.6319	10.3753	24.8018	19.9899	22.2523	24.5288	27.1843	5.19719	5.41882	2.59273		495	17.2109	20.3234	14.2686
496	24.4537	14.3912	16.0931	13.1321	13.921	32.2568	39.3755	27.2212	30.7112	26.7834	26.3666	13.633	7.85679	4.21794	6.36962	18.6962	6.19074	4.54847	3.46295	3.3619	9.05377	16.8285	18.0088	7.89342	24.5433	22.416	20.9287	23.4306	24.5464	25.1995	16.1579	13.7446	5.66877	12.1007	10.6465	10.3616	24.7998	19.8881	22.305	24.541	27.1891	5.22118	5.41068	2.58327		496	17.1473	20.2633	14.232
497	24.5008	14.4041	16.0335	13.0548	13.9144	32.2306	39.284	27.1483	30.7209	26.7429	26.3184	13.6121	7.91431	4.23876	6.42077	18.7251	6.17903	4.59674	3.47895	3.35302	9.09756	16.7958	18.017	7.89471	24.5245	22.4139	20.9316	23.4533	24.5543	25.1791	16.1512	13.7973	5.69389	12.1657	10.6626	10.3486	24.7917	19.7874	22.3595	24.5507	27.1924	5.24442	5.39945	2.57499		497	17.0864	20.2014	14.1983
498	24.5467	14.4165	15.9718	12.9793	13.9102	32.202	39.1891	27.0713	30.7305	26.7045	26.2722	13.5886	7.97086	4.25962	6.47153	18.7561	6.16739	4.6451	3.49438	3.3437	9.1417	16.7639	18.0244	7.89862	24.5072	22.4144	20.9355	23.4739	24.563	25.1606	16.1441	13.8477	5.71966	12.2334	10.6802	10.3365	24.7776	19.6877	22.4156	24.5578	27.1942	5.26686	5.38515	2.56783		498	17.0284	20.1379	14.1675
499	24.5914	14.4285	15.9084	12.9058	13.9085	32.171	39.0909	26.9904	30.7401	26.6682	26.2279	13.5626	8.02637	4.28056	6.52181	18.7891	6.15583	4.69337	3.50925	3.334	9.18618	16.7328	18.0311	7.90514	24.4914	22.4177	20.9402	23.4926	24.5725	25.144	16.1366	13.8955	5.74607	12.3037	10.6992	10.3253	24.7575	19.5893	22.4731	24.5622	27.1945	5.28845	5.36781	2.56174		499	16.9734	20.0726	14.1396
500	24.6346	14.4401	15.8432	12.8344	13.9092	32.1378	38.9893	26.9058	30.7497	26.6341	26.1855	13.5342	8.08076	4.3016	6.57151	18.8241	6.14434	4.74137	3.52359	3.32399	9.23101	16.7025	18.037	7.91424	24.4772	22.4236	20.9457	23.5094	24.5825	25.1293	16.1289	13.9407	5.77311	12.3768	10.7195	10.3151	24.7314	19.4923	22.532	24.5639	27.1932	5.30913	5.34747	2.55664		500	16.9214	20.0056	14.1145
501	24.6763	14.4516	15.7765	12.7652	13.9124	32.1025	38.8845	26.8177	30.7593	26.6023	26.1449	13.5034	8.13399	4.32277	6.62054	18.861	6.1329	4.78894	3.53743	3.31374	9.27618	16.6732	18.0423	7.92588	24.4645	22.4323	20.952	23.5243	24.5929	25.1164	16.1211	13.9832	5.80078	12.4524	10.7411	10.306	24.6995	19.3967	22.592	24.5628	27.1904	5.32887	5.32418	2.55249		501	16.8727	19.937	14.092
502	24.7164	14.4628	15.7084	12.6983	13.9181	32.0652	38.7766	26.7263	30.7688	26.5729	26.1062	13.4703	8.18598	4.34408	6.6688	18.8998	6.1215	4.8359	3.55078	3.3033	9.32166	16.6448	18.0469	7.94004	24.4533	22.4438	20.959	23.5373	24.6035	25.1053	16.1131	14.0229	5.82907	12.5307	10.764	10.298	24.6619	19.3028	22.653	24.5588	27.186	5.34761	5.29799	2.5492		502	16.8271	19.8667	14.0722
503	24.7546	14.474	15.6391	12.6338	13.9264	32.0259	38.6656	26.6317	30.7783	26.5459	26.0693	13.435	8.2367	4.36556	6.7162	18.9405	6.11015	4.88208	3.5637	3.29274	9.36743	16.6175	18.0509	7.95667	24.4435	22.4581	20.9666	23.5486	24.6143	25.0959	16.1051	14.0597	5.85797	12.6115	10.7879	10.2913	24.6185	19.2105	22.7149	24.552	27.18	5.36532	5.26898	2.54672		503	16.7849	19.7948	14.0549
504	24.7911	14.4853	15.5687	12.5718	13.9372	31.9848	38.5517	26.5344	30.7878	26.5213	26.0341	13.3976	8.28608	4.38724	6.76264	18.9829	6.09882	4.92733	3.5762	3.28213	9.41348	16.5912	18.0543	7.97575	24.4352	22.4752	20.9748	23.5581	24.6252	25.088	16.0972	14.0935	5.88747	12.6949	10.8129	10.2859	24.5697	19.1201	22.7774	24.5423	27.1725	5.38197	5.23721	2.54497		504	16.746	19.7212	14.0399
505	24.8256	14.4966	15.4974	12.5123	13.9507	31.942	38.4348	26.4344	30.7973	26.4993	26.0006	13.358	8.3341	4.40912	6.80802	19.027	6.08752	4.97149	3.58833	3.27152	9.45976	16.5661	18.0571	7.99722	24.4284	22.495	20.9836	23.566	24.6359	25.0816	16.0894	14.1243	5.91757	12.7806	10.8388	10.2818	24.5154	19.0314	22.8405	24.5297	27.1635	5.39751	5.20279	2.54389		505	16.7106	19.646	14.0273
506	24.8581	14.5081	15.4255	12.4554	13.9667	31.8977	38.3153	26.3321	30.8066	26.4798	25.9686	13.3165	8.38072	4.43123	6.85225	19.0728	6.07625	5.01439	3.60013	3.26097	9.50624	16.5421	18.0594	8.02104	24.4229	22.5177	20.9928	23.5723	24.6463	25.0767	16.0819	14.152	5.94825	12.8686	10.8656	10.2792	24.4559	18.9447	22.9039	24.5141	27.1529	5.41191	5.16579	2.54339		506	16.6787	19.5693	14.0169
507	24.8886	14.52	15.3529	12.4012	13.9853	31.8519	38.1931	26.2277	30.8159	26.4628	25.9381	13.2731	8.4259	4.45357	6.89523	19.12	6.06498	5.0559	3.61164	3.25054	9.55287	16.5194	18.0613	8.04718	24.4188	22.5431	21.0025	23.5771	24.6564	25.0732	16.0748	14.1767	5.9795	12.9589	10.8932	10.2781	24.3912	18.8599	22.9674	24.4958	27.1408	5.42516	5.12631	2.5434		507	16.6503	19.4909	14.0086
508	24.9169	14.5323	15.28	12.3497	14.0066	31.8047	38.0684	26.1215	30.8251	26.4484	25.9089	13.2278	8.46963	4.47616	6.93688	19.1686	6.05372	5.09586	3.6229	3.24029	9.59961	16.4979	18.0626	8.07557	24.416	22.5712	21.0125	23.5803	24.666	25.0709	16.0681	14.1982	6.01131	13.0512	10.9214	10.2786	24.3216	18.7771	23.0311	24.4745	27.1273	5.43723	5.08448	2.54386		508	16.6254	19.4111	14.0023
509	24.9432	14.5451	15.207	12.301	14.0304	31.7564	37.9414	26.0139	30.8341	26.4366	25.8811	13.1808	8.51187	4.49899	6.9771	19.2186	6.04247	5.13416	3.63396	3.23027	9.6464	16.4777	18.0636	8.10618	24.4144	22.6021	21.0229	23.5823	24.675	25.0698	16.0619	14.2165	6.04366	13.1454	10.9501	10.2806	24.2471	18.6963	23.0945	24.4505	27.1124	5.44809	5.0404	2.54468		509	16.604	19.3297	13.998
510	24.9674	14.5585	15.1339	12.2551	14.0569	31.7069	37.8122	25.9051	30.8429	26.4273	25.8544	13.1322	8.55264	4.52209	7.01581	19.2697	6.03121	5.17064	3.64486	3.22052	9.69317	16.4589	18.0642	8.13895	24.4142	22.6356	21.0336	23.5829	24.6833	25.0698	16.0564	14.2317	6.07655	13.2414	10.9793	10.2843	24.168	18.6175	23.1577	24.4237	27.0961	5.45774	4.99419	2.54578		510	16.5862	19.2469	13.9955
511	24.9895	14.5727	15.0609	12.212	14.086	31.6566	37.6809	25.7954	30.8514	26.4205	25.8287	13.0821	8.59191	4.54543	7.05291	19.3219	6.01995	5.2052	3.65566	3.2111	9.73987	16.4415	18.0645	8.17383	24.415	22.6717	21.0446	23.5823	24.6907	25.0708	16.0516	14.2438	6.10996	13.339	11.0088	10.2897	24.0843	18.5408	23.2205	24.3942	27.0785	5.46616	4.94599	2.54711		511	16.572	19.1626	13.9947
512	25.0094	14.5876	14.9883	12.1718	14.1177	31.6054	37.5478	25.6851	30.8597	26.4163	25.8039	13.0305	8.62969	4.56902	7.08834	19.375	6.00867	5.23772	3.66641	3.20205	9.78642	16.4254	18.0645	8.21078	24.4171	22.7104	21.0558	23.5806	24.6973	25.0727	16.0477	14.2527	6.14387	13.438	11.0386	10.2968	23.9964	18.4661	23.2828	24.3621	27.0596	5.47335	4.89592	2.54857		512	16.5613	19.0769	13.9955
513	25.0273	14.6035	14.9162	12.1344	14.152	31.5535	37.413	25.5746	30.8676	26.4145	25.78	12.9775	8.666	4.59285	7.122	19.4289	5.99739	5.26809	3.67715	3.19342	9.83274	16.4108	18.0643	8.24973	24.4202	22.7517	21.0672	23.5778	24.7028	25.0755	16.0446	14.2586	6.17827	13.5384	11.0685	10.3057	23.9043	18.3934	23.3443	24.3274	27.0396	5.4793	4.84413	2.55009		513	16.5541	18.9898	13.9979
514	25.0432	14.6203	14.8448	12.1	14.1888	31.501	37.2766	25.4641	30.8751	26.4151	25.7567	12.9233	8.70083	4.6169	7.15384	19.4834	5.98609	5.29621	3.68793	3.18523	9.87876	16.3976	18.064	8.29065	24.4244	22.7954	21.0788	23.5741	24.7071	25.079	16.0426	14.2614	6.21313	13.6397	11.0984	10.3164	23.8082	18.3227	23.405	24.2903	27.0185	5.48401	4.79076	2.55161		514	16.5504	18.9015	14.0018
515	25.0571	14.6382	14.7743	12.0683	14.2282	31.4481	37.139	25.3539	30.8822	26.4181	25.7341	12.8679	8.73422	4.64115	7.18379	19.5385	5.97478	5.32199	3.69881	3.17754	9.92438	16.3859	18.0635	8.33348	24.4295	22.8414	21.0905	23.5694	24.7103	25.0833	16.0417	14.2612	6.24844	13.742	11.1283	10.3289	23.7083	18.2539	23.4648	24.2508	26.9963	5.48749	4.73596	2.55304		515	16.5501	18.8118	14.0072
516	25.0691	14.6572	14.7048	12.0395	14.2701	31.395	37.0003	25.2445	30.8887	26.4235	25.7118	12.8115	8.76619	4.66559	7.21177	19.594	5.96345	5.34535	3.70984	3.17036	9.96953	16.3757	18.063	8.37817	24.4355	22.8898	21.1024	23.564	24.7121	25.0882	16.0419	14.2581	6.28417	13.8449	11.1579	10.3433	23.6048	18.1871	23.5236	24.2091	26.9732	5.48973	4.67987	2.55433		516	16.5532	18.7209	14.0139
517	25.0793	14.6773	14.6364	12.0136	14.3145	31.3416	36.8606	25.1359	30.8947	26.431	25.6899	12.7541	8.79677	4.69018	7.23775	19.6497	5.95211	5.3662	3.72106	3.16374	10.0141	16.3669	18.0625	8.42468	24.4424	22.9404	21.1144	23.5579	24.7125	25.0937	16.0434	14.2522	6.32031	13.9482	11.1872	10.3594	23.4979	18.122	23.5812	24.1652	26.9493	5.49076	4.62266	2.55539		517	16.5596	18.6287	14.022
518	25.0878	14.6987	14.5694	11.9904	14.3613	31.2882	36.7203	25.0287	30.9	26.4408	25.6683	12.6958	8.82601	4.71489	7.26165	19.7055	5.94075	5.3845	3.73254	3.15769	10.058	16.3596	18.062	8.47294	24.4501	22.9932	21.1265	23.5511	24.7114	25.0996	16.0463	14.2435	6.35684	14.0518	11.2161	10.3775	23.3878	18.0588	23.6376	24.1193	26.9246	5.49058	4.56448	2.55616		518	16.5692	18.5355	14.0314
519	25.0946	14.7214	14.5039	11.97	14.4105	31.2349	36.5796	24.923	30.9047	26.4526	25.6467	12.6368	8.85396	4.73968	7.28346	19.7613	5.92939	5.40016	3.74431	3.15225	10.1012	16.3538	18.0617	8.52292	24.4586	23.0481	21.1388	23.5437	24.7087	25.1061	16.0506	14.2321	6.39372	14.1554	11.2445	10.3973	23.2745	17.9973	23.6927	24.0714	26.8993	5.4892	4.50549	2.55657		519	16.5819	18.4412	14.042
520	25.0999	14.7454	14.44	11.9522	14.4621	31.1817	36.4387	24.8191	30.9085	26.4664	25.6253	12.5771	8.88065	4.76452	7.30312	19.8169	5.91802	5.41316	3.75642	3.14742	10.1435	16.3494	18.0615	8.57457	24.4677	23.1049	21.1512	23.5358	24.7044	25.1129	16.0563	14.2181	6.43094	14.2588	11.2723	10.419	23.1584	17.9375	23.7465	24.0218	26.8734	5.48665	4.44584	2.55657		520	16.5976	18.3458	14.0539
521	25.1038	14.7707	14.378	11.9372	14.5161	31.1289	36.2978	24.7172	30.9116	26.4822	25.6037	12.5169	8.90616	4.78935	7.32061	19.8721	5.90665	5.42345	3.76892	3.14324	10.1848	16.3464	18.0615	8.62784	24.4774	23.1635	21.1637	23.5276	24.6984	25.12	16.0636	14.2018	6.46847	14.3617	11.2993	10.4425	23.0396	17.8792	23.7988	23.9704	26.8471	5.48295	4.3857	2.55609		521	16.6162	18.2495	14.0671
522	25.1064	14.7973	14.3178	11.9247	14.5723	31.0764	36.1571	24.6178	30.9138	26.4997	25.582	12.4562	8.93055	4.81413	7.33591	19.9268	5.89528	5.431	3.78187	3.1397	10.2251	16.3449	18.0618	8.68269	24.4878	23.224	21.1764	23.5189	24.6906	25.1275	16.0725	14.183	6.50627	14.464	11.3254	10.4677	22.9182	17.8225	23.8496	23.9176	26.8205	5.47812	4.32524	2.55507		522	16.6377	18.1523	14.0816
523	25.1078	14.8252	14.2597	11.9147	14.6307	31.0245	36.0171	24.5209	30.915	26.519	25.5601	12.3951	8.95388	4.8388	7.349	19.9809	5.88393	5.43578	3.79529	3.13682	10.2642	16.3447	18.0625	8.73908	24.4986	23.2861	21.1892	23.51	24.681	25.1352	16.0831	14.1621	6.54434	14.5653	11.3507	10.4947	22.7944	17.7671	23.8989	23.8633	26.7937	5.47218	4.2646	2.55346		523	16.6618	18.0543	14.0973
524	25.1082	14.8543	14.2038	11.9072	14.6913	30.9732	35.8778	24.4269	30.9153	26.5398	25.5379	12.3338	8.97623	4.8633	7.35989	20.0343	5.87261	5.4378	3.80923	3.13461	10.302	16.3459	18.0636	8.79696	24.5099	23.3499	21.2021	23.5009	24.6695	25.1431	16.0953	14.1391	6.58262	14.6656	11.3748	10.5233	22.6685	17.713	23.9467	23.8077	26.7669	5.46517	4.20395	2.55121		524	16.6884	17.9555	14.1144
525	25.1077	14.8848	14.1501	11.902	14.7539	30.9227	35.7395	24.336	30.9146	26.5622	25.5154	12.2722	8.99768	4.88758	7.36857	20.0867	5.86132	5.43703	3.82372	3.13307	10.3385	16.3484	18.0652	8.85629	24.5215	23.4151	21.2153	23.4916	24.656	25.1513	16.1093	14.1142	6.6211	14.7645	11.3979	10.5536	22.5405	17.6601	23.9929	23.7509	26.7401	5.4571	4.14345	2.54827		525	16.7175	17.8561	14.1329
526	25.1064	14.9164	14.0988	11.8991	14.8186	30.873	35.6026	24.2483	30.9127	26.5859	25.4926	12.2106	9.01831	4.91155	7.37506	20.1382	5.85008	5.4335	3.83882	3.1322	10.3735	16.3522	18.0673	8.91703	24.5335	23.4816	21.2287	23.4822	24.6405	25.1596	16.125	14.0875	6.65974	14.8619	11.4197	10.5854	22.4106	17.6083	24.0376	23.6931	26.7135	5.44801	4.08325	2.54459		526	16.7488	17.756	14.1528
527	25.1045	14.9492	14.05	11.8984	14.8852	30.8241	35.4673	24.1641	30.9098	26.6109	25.4694	12.149	9.03821	4.93517	7.37938	20.1885	5.83891	5.42721	3.85454	3.132	10.4069	16.3571	18.07	8.97915	24.5459	23.5494	21.2423	23.4728	24.623	25.1681	16.1425	14.0592	6.69852	14.9575	11.4401	10.6188	22.279	17.5575	24.0807	23.6343	26.6872	5.43794	4.0235	2.54014		527	16.7821	17.6554	14.1742
528	25.1022	14.9831	14.0037	11.8998	14.9537	30.7763	35.3338	24.0836	30.9056	26.6371	25.4457	12.0875	9.05747	4.95836	7.38156	20.2376	5.82781	5.41819	3.87092	3.13246	10.4387	16.3632	18.0734	9.04261	24.5584	23.6184	21.2562	23.4634	24.6034	25.1767	16.1618	14.0295	6.73739	15.0511	11.4592	10.6535	22.1458	17.5076	24.1223	23.5748	26.6614	5.4269	3.96436	2.53488		528	16.8174	17.5544	14.1973
529	25.0995	15.0179	13.9601	11.9032	15.024	30.7295	35.2023	24.0069	30.9003	26.6643	25.4217	12.0262	9.07617	4.98103	7.38163	20.2853	5.81681	5.40648	3.88798	3.13358	10.4688	16.3705	18.0775	9.10736	24.5712	23.6884	21.2704	23.4541	24.5817	25.1855	16.1829	13.9984	6.77634	15.1426	11.4767	10.6895	22.0112	17.4584	24.1624	23.5145	26.6361	5.41494	3.90598	2.52876		529	16.8545	17.4531	14.222
530	25.0967	15.0536	13.9192	11.9085	15.0959	30.6838	35.0733	23.9341	30.8938	26.6924	25.3972	11.9652	9.09443	5.00313	7.37965	20.3315	5.80592	5.39211	3.90576	3.13535	10.4969	16.3787	18.0824	9.17338	24.5841	23.7594	21.2849	23.4448	24.5579	25.1943	16.2058	13.9661	6.81531	15.2318	11.4927	10.7268	21.8753	17.4099	24.201	23.4536	26.6116	5.40208	3.84849	2.52178		530	16.8932	17.3515	14.2485
531	25.0938	15.09	13.881	11.9155	15.1695	30.6393	34.9468	23.8655	30.886	26.7213	25.3724	11.9045	9.11232	5.02456	7.37567	20.3763	5.79517	5.37513	3.92426	3.13776	10.5232	16.3879	18.0881	9.24063	24.5972	23.8311	21.2999	23.4357	24.5319	25.2033	16.2305	13.9329	6.85428	15.3184	11.507	10.7652	21.7382	17.3619	24.2381	23.3923	26.588	5.38837	3.79204	2.5139		531	16.9333	17.2497	14.2769
532	25.091	15.1271	13.8456	11.9242	15.2446	30.596	34.8232	23.801	30.8769	26.7508	25.3472	11.8442	9.12997	5.04526	7.36975	20.4194	5.78459	5.3556	3.94351	3.14078	10.5475	16.398	18.0948	9.30907	24.6103	23.9037	21.3152	23.4268	24.5038	25.2125	16.2571	13.8989	6.89322	15.4023	11.5196	10.8045	21.6001	17.3144	24.2739	23.3306	26.5654	5.37383	3.73675	2.50509		532	16.9747	17.1478	14.3073
533	25.0884	15.1647	13.813	11.9344	15.321	30.554	34.7028	23.7409	30.8666	26.7809	25.3218	11.7846	9.14745	5.06514	7.36196	20.4608	5.77418	5.33359	3.96352	3.14441	10.5696	16.4089	18.1025	9.37868	24.6236	23.9768	21.3311	23.418	24.4735	25.2217	16.2853	13.8642	6.93209	15.4833	11.5304	10.8447	21.4611	17.2672	24.3084	23.2686	26.5439	5.35849	3.68277	2.49536		533	17.0171	17.046	14.3399
534	25.0862	15.2025	13.7832	11.9461	15.3988	30.5133	34.5856	23.6852	30.855	26.8115	25.2961	11.7255	9.16487	5.08412	7.35239	20.5004	5.76399	5.30917	3.9843	3.14863	10.5897	16.4205	18.1112	9.44941	24.6368	24.0505	21.3474	23.4096	24.4411	25.2311	16.3153	13.8291	6.97085	15.5613	11.5393	10.8856	21.3213	17.2202	24.3415	23.2064	26.5237	5.3424	3.6302	2.48468		534	17.0605	16.9443	14.3748
535	25.0845	15.2406	13.7562	11.959	15.4777	30.4739	34.4721	23.634	30.8421	26.8424	25.2703	11.6671	9.18234	5.10214	7.34112	20.5383	5.75403	5.28243	4.00585	3.15341	10.6075	16.4328	18.121	9.52123	24.6501	24.1245	21.3644	23.4014	24.4065	25.2406	16.347	13.7936	7.00947	15.6361	11.5463	10.9271	21.1808	17.1734	24.3735	23.1441	26.5049	5.32557	3.57918	2.47305		535	17.1046	16.8428	14.4122
536	25.0834	15.2787	13.7321	11.9731	15.5577	30.4359	34.3624	23.5872	30.828	26.8734	25.2444	11.6095	9.19994	5.1191	7.32825	20.5743	5.74434	5.25344	4.02817	3.15875	10.623	16.4456	18.132	9.5941	24.6634	24.1989	21.3819	23.3935	24.3697	25.2502	16.3804	13.758	7.04792	15.7077	11.5513	10.9691	21.0398	17.1265	24.4044	23.0818	26.4876	5.30805	3.52981	2.46048		536	17.1492	16.7416	14.4522
537	25.0829	15.3165	13.7108	11.9883	15.6387	30.3992	34.2567	23.545	30.8126	26.9046	25.2185	11.5527	9.21778	5.13494	7.31388	20.6084	5.73494	5.22231	4.05127	3.1646	10.6362	16.459	18.1442	9.66799	24.6767	24.2736	21.4001	23.3859	24.3308	25.2601	16.4154	13.7224	7.08616	15.7759	11.5543	11.0113	20.8983	17.0796	24.4342	23.0196	26.472	5.28986	3.48219	2.44695		537	17.1942	16.6409	14.495
538	25.0833	15.354	13.6923	12.0044	15.7205	30.3639	34.1552	23.5074	30.7961	26.9358	25.1927	11.4969	9.23595	5.14958	7.29811	20.6406	5.72588	5.18913	4.07513	3.17096	10.647	16.4727	18.1577	9.74287	24.69	24.3484	21.4191	23.3786	24.2898	25.27	16.4519	13.6869	7.12415	15.8406	11.5552	11.0536	20.7565	17.0324	24.4631	22.9574	26.4582	5.27103	3.43643	2.43249		538	17.2395	16.5406	14.5407
539	25.0845	15.3909	13.6765	12.0213	15.8029	30.3299	34.0582	23.4744	30.7783	26.9668	25.1672	11.442	9.25455	5.16294	7.28107	20.6709	5.71717	5.15401	4.09974	3.17779	10.6554	16.4867	18.1725	9.81869	24.7032	24.4232	21.4388	23.3717	24.2468	25.2802	16.49	13.6518	7.16188	15.9016	11.554	11.0959	20.6144	16.985	24.4911	22.8955	26.4463	5.2516	3.39262	2.41709		539	17.2847	16.441	14.5895
540	25.0868	15.4271	13.6634	12.0389	15.8859	30.2973	33.9658	23.4459	30.7594	26.9975	25.142	11.3883	9.27365	5.17497	7.26286	20.6993	5.70886	5.11708	4.1251	3.18507	10.6614	16.5009	18.1887	9.89542	24.7165	24.498	21.4593	23.3652	24.2017	25.2905	16.5294	13.6171	7.19929	15.9591	11.5506	11.138	20.4721	16.9372	24.5183	22.8338	26.4365	5.23159	3.35085	2.40079		540	17.3299	16.342	14.6416
541	25.0901	15.4622	13.653	12.0571	15.9693	30.2659	33.8782	23.422	30.7394	27.0279	25.1174	11.3356	9.29334	5.18559	7.24361	20.7258	5.70098	5.07843	4.15118	3.19279	10.665	16.5153	18.2063	9.97301	24.7298	24.5728	21.4808	23.3591	24.1546	25.3011	16.5702	13.5831	7.23636	16.0128	11.5451	11.1797	20.3297	16.8889	24.5448	22.7723	26.4289	5.21102	3.31119	2.38361		541	17.3748	16.2439	14.6971
542	25.0945	15.4961	13.6451	12.0756	16.0529	30.2359	33.7955	23.4026	30.7184	27.0579	25.0933	11.2842	9.3137	5.19475	7.22346	20.7504	5.69357	5.0382	4.17795	3.2009	10.666	16.5297	18.2254	10.0514	24.7431	24.6473	21.5031	23.3534	24.1056	25.3118	16.6123	13.5498	7.27307	16.0627	11.5373	11.2208	20.1873	16.8401	24.5707	22.7113	26.4235	5.18992	3.27371	2.36557		542	17.4193	16.1468	14.7562
543	25.1	15.5287	13.6397	12.0945	16.1367	30.207	33.718	23.3876	30.6964	27.0873	25.07	11.234	9.33481	5.20238	7.20252	20.7731	5.68666	4.99651	4.20539	3.20939	10.6646	16.5441	18.2459	10.1306	24.7564	24.7216	21.5265	23.3481	24.0547	25.3228	16.6556	13.5174	7.30937	16.1088	11.5273	11.2611	20.045	16.7906	24.5961	22.6506	26.4205	5.16832	3.23848	2.34669		543	17.4631	16.0506	14.8192
544	25.1068	15.5596	13.6366	12.1135	16.2204	30.1794	33.6457	23.377	30.6735	27.116	25.0477	11.1851	9.35674	5.20844	7.18094	20.7941	5.68028	4.9535	4.23348	3.21824	10.6607	16.5583	18.268	10.2105	24.7698	24.7956	21.5508	23.3432	24.002	25.334	16.6999	13.4861	7.34524	16.1511	11.515	11.3005	19.9028	16.7405	24.621	22.5903	26.42	5.14624	3.20555	2.32703		544	17.5063	15.9555	14.8861
545	25.1148	15.5886	13.6358	12.1326	16.304	30.1528	33.5788	23.3707	30.6497	27.144	25.0264	11.1376	9.37953	5.21288	7.15885	20.8132	5.67448	4.90929	4.26217	3.22741	10.6544	16.5723	18.2916	10.2911	24.7832	24.8692	21.5763	23.3387	23.9475	25.3455	16.7453	13.4558	7.38066	16.1895	11.5005	11.3388	19.7608	16.6896	24.6456	22.5304	26.422	5.1237	3.17497	2.30662		545	17.5487	15.8617	14.9571
546	25.1241	15.6157	13.6372	12.1517	16.3871	30.1273	33.5173	23.3687	30.6252	27.1712	25.0063	11.0915	9.40326	5.21566	7.13638	20.8307	5.66929	4.86402	4.29143	3.23688	10.6456	16.5861	18.3167	10.3723	24.7968	24.9423	21.6028	23.3347	23.8914	25.3572	16.7916	13.4268	7.41559	16.2241	11.4837	11.3757	19.619	16.6379	24.6698	22.471	26.4268	5.10073	3.14679	2.2855		546	17.59	15.7691	15.0324
547	25.1347	15.6404	13.6406	12.1706	16.4698	30.1028	33.4614	23.3707	30.6	27.1974	24.9875	11.047	9.42797	5.21674	7.11367	20.8464	5.66475	4.81784	4.32121	3.24663	10.6344	16.5994	18.3435	10.4541	24.8106	25.015	21.6306	23.331	23.8336	25.3692	16.8387	13.3992	7.45002	16.2549	11.4646	11.4112	19.4775	16.5854	24.6939	22.4121	26.4343	5.07733	3.12102	2.26372		547	17.6303	15.678	15.1121
548	25.1466	15.6627	13.646	12.1893	16.5517	30.0792	33.4112	23.3768	30.5742	27.2226	24.9703	11.0039	9.45369	5.2161	7.09086	20.8606	5.66088	4.77089	4.35147	3.25665	10.6208	16.6123	18.3718	10.5364	24.8245	25.0872	21.6595	23.3279	23.7743	25.3814	16.8864	13.373	7.48392	16.2819	11.4433	11.445	19.3363	16.532	24.7178	22.3538	26.4446	5.05354	3.09771	2.24133		548	17.6695	15.5883	15.1963
549	25.1597	15.6823	13.6531	12.2075	16.6328	30.0564	33.3667	23.3867	30.5479	27.2466	24.9548	10.9624	9.48046	5.21372	7.06808	20.8733	5.65773	4.7233	4.38216	3.2669	10.605	16.6247	18.4017	10.6191	24.8387	25.1588	21.6898	23.3251	23.7135	25.3938	16.9348	13.3484	7.51726	16.3052	11.4197	11.4769	19.1956	16.4776	24.7416	22.2959	26.4579	5.02937	3.07687	2.2184		549	17.7073	15.5003	15.2852
550	25.1741	15.6991	13.6619	12.2253	16.7129	30.0343	33.3279	23.4004	30.5213	27.2695	24.941	10.9226	9.5083	5.20957	7.04547	20.8846	5.65533	4.67522	4.41323	3.27736	10.5868	16.6364	18.4332	10.7022	24.8532	25.2298	21.7213	23.3228	23.6515	25.4065	16.9837	13.3253	7.55004	16.3248	11.3939	11.5067	19.0553	16.4222	24.7655	22.2386	26.4741	5.00483	3.05851	2.19497		550	17.7438	15.4138	15.379
551	25.1897	15.7129	13.6721	12.2425	16.7918	30.0128	33.2949	23.4178	30.4943	27.291	24.9292	10.8844	9.53723	5.20366	7.02316	20.8945	5.65372	4.6268	4.44462	3.28802	10.5665	16.6476	18.4663	10.7856	24.868	25.3001	21.7541	23.3209	23.5881	25.4195	17.033	13.304	7.58223	16.3408	11.3658	11.5344	18.9155	16.3659	24.7893	22.1819	26.4933	4.97994	3.04263	2.17112		551	17.7788	15.3292	15.4777
552	25.2065	15.7235	13.6837	12.259	16.8693	29.9918	33.2678	23.4387	30.4672	27.3112	24.9195	10.848	9.56726	5.19599	7.00127	20.9032	5.65291	4.57817	4.47628	3.29887	10.544	16.658	18.5009	10.8692	24.8832	25.3698	21.7883	23.3195	23.5236	25.4326	17.0825	13.2844	7.61382	16.3532	11.3356	11.5597	18.7761	16.3085	24.8132	22.1257	26.5156	4.95471	3.02922	2.1469		552	17.8123	15.2463	15.5814
553	25.2245	15.7307	13.6965	12.2748	16.9452	29.9712	33.2464	23.4629	30.4399	27.33	24.912	10.8132	9.59838	5.18656	6.97992	20.9107	5.65295	4.52948	4.50815	3.30988	10.5195	16.6676	18.537	10.953	24.8989	25.4388	21.8239	23.3185	23.458	25.446	17.1322	13.2666	7.64479	16.3622	11.3031	11.5824	18.6373	16.2502	24.8372	22.0701	26.541	4.92917	3.01828	2.12239		553	17.8443	15.1654	15.6902
554	25.2435	15.7344	13.7103	12.2898	17.0194	29.9509	33.2309	23.4903	30.4128	27.3472	24.9068	10.7803	9.63057	5.17539	6.95924	20.9172	5.65385	4.48088	4.54015	3.32105	10.493	16.6765	18.5746	11.0368	24.9151	25.5071	21.861	23.318	23.3915	25.4596	17.1819	13.2506	7.67513	16.3678	11.2686	11.6024	18.4991	16.1908	24.8614	22.015	26.5695	4.90332	3.00978	2.09766		554	17.8746	15.0864	15.8042
555	25.2635	15.7345	13.725	12.3038	17.0918	29.9308	33.2211	23.5208	30.3857	27.3628	24.904	10.7492	9.66383	5.1625	6.93933	20.9227	5.65564	4.43249	4.57223	3.33235	10.4646	16.6845	18.6136	11.1206	24.9318	25.5747	21.8994	23.3179	23.3242	25.4734	17.2315	13.2365	7.70484	16.3701	11.2319	11.6196	18.3614	16.1304	24.8857	21.9605	26.6012	4.87719	3.0037	2.07277		555	17.9033	15.0095	15.9234
556	25.2846	15.7309	13.7404	12.3169	17.162	29.9106	33.2171	23.5542	30.3589	27.3767	24.9038	10.7198	9.69811	5.14793	6.9203	20.9274	5.65835	4.38447	4.60431	3.34379	10.4344	16.6916	18.654	11.2043	24.9492	25.6415	21.9393	23.3182	23.256	25.4873	17.281	13.2242	7.7339	16.3693	11.1932	11.6338	18.2243	16.0689	24.9102	21.9066	26.6361	4.85077	3.00001	2.04781		556	17.9304	14.9346	16.0479
557	25.3064	15.7234	13.7563	12.3289	17.23	29.8904	33.2188	23.5904	30.3325	27.3889	24.9062	10.6924	9.73338	5.13171	6.90226	20.9313	5.66199	4.33694	4.63634	3.35535	10.4026	16.6978	18.6957	11.2878	24.9673	25.7076	21.9807	23.319	23.1873	25.5014	17.3302	13.2139	7.76231	16.3655	11.1525	11.6449	18.0879	16.0065	24.9349	21.8533	26.6741	4.82409	2.99866	2.02285		557	17.9558	14.862	16.1777
558	25.3291	15.712	13.7726	12.3399	17.2956	29.87	33.2261	23.6291	30.3065	27.3993	24.9112	10.6668	9.76958	5.1139	6.88529	20.9346	5.66658	4.29003	4.66823	3.36703	10.3692	16.703	18.7387	11.371	24.9861	25.773	22.0235	23.3203	23.118	25.5155	17.3789	13.2055	7.79006	16.3588	11.1099	11.6528	17.952	15.9431	24.9598	21.8006	26.7154	4.79716	2.9996	1.99797		558	17.9794	14.7915	16.3127
559	25.3524	15.6967	13.7891	12.3497	17.3587	29.8491	33.239	23.6702	30.2811	27.4078	24.9191	10.6431	9.80668	5.09454	6.86947	20.9373	5.67214	4.24388	4.69991	3.37883	10.3344	16.7073	18.7828	11.4539	25.0058	25.8376	22.0678	23.322	23.0484	25.5297	17.4272	13.1991	7.81716	16.3494	11.0654	11.6573	17.8168	15.8788	24.9849	21.7485	26.7598	4.76999	3.0028	1.97325		559	18.0015	14.7234	16.4531
560	25.3764	15.6773	13.8056	12.3583	17.419	29.8279	33.2574	23.7136	30.2565	27.4143	24.9297	10.6213	9.84458	5.0737	6.85488	20.9396	5.67866	4.19861	4.7313	3.39075	10.2982	16.7107	18.828	11.5362	25.0263	25.9015	22.1136	23.3241	22.9784	25.544	17.4748	13.1945	7.84361	16.3373	11.0191	11.6583	17.6821	15.8135	25.0102	21.697	26.8073	4.74261	3.00818	1.94877		560	18.0218	14.6576	16.5987
561	25.4009	15.6539	13.8221	12.3657	17.4764	29.8059	33.2811	23.7591	30.2326	27.4188	24.9432	10.6015	9.88323	5.05144	6.84159	20.9415	5.68616	4.15434	4.76234	3.40278	10.2609	16.7131	18.8743	11.6179	25.0478	25.9647	22.1608	23.3267	22.9082	25.5582	17.5217	13.1918	7.8694	16.3227	10.971	11.6559	17.5481	15.7474	25.0356	21.646	26.8579	4.71501	3.01567	1.9246		561	18.0406	14.5941	16.7494
562	25.4257	15.6265	13.8382	12.3718	17.5308	29.7833	33.3101	23.8065	30.2096	27.4212	24.9595	10.5836	9.92255	5.02785	6.82965	20.9432	5.69464	4.11117	4.79295	3.41493	10.2225	16.7145	18.9214	11.6989	25.0703	26.0271	22.2095	23.3298	22.838	25.5724	17.5678	13.1909	7.89455	16.3057	10.9212	11.6498	17.4147	15.6805	25.0611	21.5957	26.9116	4.68723	3.02522	1.90083		562	18.0577	14.533	16.9053
563	25.4508	15.595	13.8539	12.3766	17.5819	29.7597	33.3442	23.8556	30.1876	27.4215	24.9786	10.5676	9.96243	5.00301	6.81912	20.9446	5.7041	4.06923	4.82304	3.42721	10.1832	16.715	18.9693	11.779	25.0938	26.0887	22.2595	23.3333	22.7678	25.5865	17.613	13.1919	7.91905	16.2866	10.8699	11.6401	17.2819	15.6127	25.0867	21.546	26.9683	4.65927	3.03674	1.87754		563	18.0733	14.4744	17.0663
564	25.4761	15.5596	13.8691	12.3802	17.6298	29.7351	33.3834	23.9064	30.1666	27.4196	25.0006	10.5536	10.0028	4.97699	6.81003	20.946	5.71453	4.02862	4.85255	3.43962	10.143	16.7145	19.0179	11.8583	25.1184	26.1497	22.3109	23.3373	22.6977	25.6005	17.6571	13.1946	7.94292	16.2654	10.817	11.6266	17.1497	15.5443	25.1124	21.497	27.0279	4.63115	3.05015	1.8548		564	18.0874	14.4183	17.2321
565	25.5015	15.5202	13.8835	12.3825	17.6742	29.7094	33.4274	23.9586	30.1469	27.4154	25.0255	10.5415	10.0435	4.94991	6.8024	20.9473	5.72593	3.98943	4.88138	3.45218	10.1023	16.7132	19.067	11.9364	25.1442	26.21	22.3637	23.3418	22.6278	25.6142	17.7002	13.199	7.96617	16.2424	10.7627	11.6094	17.018	15.4751	25.1381	21.4486	27.0905	4.6029	3.06537	1.8327		565	18.1001	14.3647	17.4028
566	25.5268	15.477	13.8971	12.3834	17.715	29.6824	33.4762	24.0121	30.1284	27.409	25.053	10.5313	10.0845	4.92185	6.79626	20.9487	5.73827	3.95175	4.90948	3.4649	10.061	16.7109	19.1166	12.0135	25.1713	26.2695	22.4178	23.3468	22.5583	25.6277	17.742	13.2052	7.98881	16.2175	10.7071	11.5885	16.8868	15.4054	25.1638	21.4008	27.1558	4.57453	3.0823	1.81131		566	18.1114	14.3136	17.578
567	25.5519	15.43	13.9097	12.3831	17.7521	29.654	33.5295	24.0668	30.1112	27.4001	25.0833	10.5232	10.1256	4.89293	6.79162	20.9501	5.75155	3.91567	4.93675	3.47779	10.0193	16.7079	19.1665	12.0892	25.1995	26.3284	22.4731	23.3523	22.4893	25.6409	17.7825	13.2129	8.01084	16.1911	10.6502	11.5638	16.7562	15.3351	25.1894	21.3537	27.2238	4.54606	3.10084	1.7907		567	18.1215	14.2651	17.7578
568	25.5768	15.3794	13.9212	12.3814	17.7854	29.6241	33.5872	24.1224	30.0955	27.3889	25.1162	10.5169	10.1668	4.86324	6.78848	20.9517	5.76574	3.88127	4.96312	3.49086	9.97737	16.704	19.2166	12.1636	25.2291	26.3865	22.5296	23.3583	22.4208	25.6538	17.8217	13.2221	8.03229	16.1632	10.5921	11.5353	16.6261	15.2643	25.2148	21.3073	27.2944	4.51751	3.12091	1.77095		568	18.1303	14.2192	17.9418
569	25.6012	15.3253	13.9315	12.3785	17.8148	29.5925	33.6492	24.1788	30.0812	27.3752	25.1516	10.5126	10.2078	4.8329	6.78681	20.9535	5.78081	3.84861	4.98852	3.50414	9.93537	16.6994	19.2668	12.2364	25.26	26.444	22.5873	23.3648	22.353	25.6662	17.8595	13.2328	8.05317	16.134	10.533	11.5031	16.4964	15.1932	25.2401	21.2617	27.3676	4.48891	3.14239	1.75213		569	18.1381	14.1758	18.1298
570	25.6251	15.2679	13.9404	12.3744	17.8402	29.5592	33.7153	24.236	30.0684	27.3591	25.1894	10.5103	10.2487	4.80203	6.78662	20.9555	5.79674	3.81776	5.01287	3.51765	9.89341	16.6941	19.3168	12.3077	25.2922	26.5008	22.6459	23.3719	22.2859	25.6781	17.8957	13.2449	8.07349	16.1037	10.4729	11.4671	16.3672	15.1216	25.2651	21.2167	27.4431	4.46029	3.16518	1.73431		570	18.1448	14.135	18.3218
571	25.6484	15.2074	13.9479	12.3691	17.8615	29.5241	33.7853	24.2936	30.0572	27.3404	25.2296	10.5099	10.2891	4.77075	6.78785	20.9577	5.81349	3.78878	5.0361	3.53141	9.85163	16.6882	19.3666	12.3772	25.3258	26.5569	22.7056	23.3795	22.2196	25.6895	17.9304	13.2583	8.09328	16.0723	10.4119	11.4275	16.2384	15.0498	25.2899	21.1726	27.5208	4.43167	3.18917	1.71755		571	18.1507	14.0969	18.5173
572	25.6709	15.1438	13.9539	12.3625	17.8787	29.4871	33.859	24.3517	30.0476	27.3192	25.2719	10.5113	10.3291	4.73917	6.79048	20.9602	5.83102	3.76172	5.05814	3.54543	9.81018	16.6817	19.416	12.4449	25.3609	26.6124	22.7662	23.3876	22.1542	25.7002	17.9634	13.2729	8.11255	16.0401	10.3502	11.3843	16.1099	14.9778	25.3142	21.1292	27.6007	4.40308	3.21425	1.70191		572	18.1557	14.0613	18.7161
573	25.6926	15.0776	13.9582	12.3549	17.8918	29.448	33.9362	24.4101	30.0396	27.2954	25.3162	10.5147	10.3684	4.70741	6.79446	20.9629	5.84929	3.73661	5.07891	3.55975	9.76919	16.6747	19.4649	12.5106	25.3973	26.6671	22.8275	23.3964	22.0898	25.7103	17.9947	13.2886	8.13132	16.0071	10.2879	11.3376	15.9818	14.9057	25.3382	21.0866	27.6826	4.37455	3.2403	1.68746		573	18.1601	14.0283	18.918
574	25.7133	15.0088	13.9609	12.3462	17.9006	29.4068	34.0167	24.4686	30.0333	27.269	25.3623	10.52	10.407	4.67559	6.79973	20.9659	5.86825	3.71348	5.09835	3.57439	9.72878	16.6672	19.5132	12.5743	25.4352	26.7212	22.8895	23.4057	22.0265	25.7196	18.0243	13.3053	8.14961	15.9735	10.225	11.2874	15.8539	14.8335	25.3617	21.0449	27.7663	4.34611	3.26721	1.67424		574	18.1639	13.9979	19.1227
575	25.7329	14.9377	13.9619	12.3364	17.9051	29.3635	34.1004	24.5271	30.0287	27.24	25.4102	10.5272	10.4446	4.64385	6.80623	20.9691	5.88787	3.69237	5.11639	3.58937	9.68909	16.6594	19.5606	12.6359	25.4745	26.7746	22.9522	23.4157	21.9643	25.7281	18.0521	13.323	8.16744	15.9393	10.1616	11.2339	15.7263	14.7613	25.3847	21.0041	27.8517	4.3178	3.29487	1.66232		575	18.1672	13.9702	19.3298
576	25.7514	14.8646	13.9611	12.3256	17.9054	29.3179	34.187	24.5855	30.0257	27.2084	25.4595	10.5362	10.4812	4.61229	6.81389	20.9725	5.90807	3.67329	5.13296	3.60472	9.65025	16.6514	19.607	12.6952	25.5152	26.8273	23.0153	23.4262	21.9033	25.7357	18.0781	13.3415	8.18483	15.9048	10.0979	11.1771	15.5989	14.6892	25.4072	20.9641	27.9386	4.28965	3.32314	1.65172		576	18.1702	13.945	19.5391
577	25.7687	14.7898	13.9584	12.314	17.9015	29.27	34.2763	24.6437	30.0245	27.1742	25.5101	10.5471	10.5167	4.58104	6.82264	20.9761	5.92881	3.65624	5.14802	3.62048	9.61236	16.6431	19.6524	12.7522	25.5572	26.8793	23.0788	23.4375	21.8436	25.7424	18.1022	13.3608	8.20181	15.87	10.034	11.1173	15.4717	14.6172	25.429	20.9252	28.0269	4.26171	3.35191	1.64251		577	18.173	13.9223	19.7502
578	25.7845	14.7136	13.9538	12.3015	17.8933	29.2198	34.3682	24.7015	30.0248	27.1373	25.5619	10.5598	10.5508	4.55022	6.83238	20.9797	5.95004	3.64124	5.16149	3.63665	9.57555	16.6347	19.6966	12.8068	25.6007	26.9305	23.1425	23.4493	21.7852	25.7481	18.1244	13.3807	8.21839	15.835	9.97003	11.0544	15.3445	14.5454	25.4502	20.8872	28.1163	4.234	3.38107	1.6347		578	18.1756	13.9023	19.9627
579	25.799	14.6361	13.9474	12.2882	17.8809	29.1673	34.4624	24.7589	30.0269	27.0978	25.6145	10.5744	10.5834	4.51994	6.84304	20.9835	5.97168	3.62826	5.17333	3.65328	9.53992	16.6263	19.7394	12.8589	25.6455	26.981	23.2063	23.4619	21.7282	25.7527	18.1447	13.4011	8.23459	15.8	9.906	10.9888	15.2175	14.4739	25.4707	20.8502	28.2067	4.20657	3.41049	1.62835		579	18.1783	13.8847	20.1763
580	25.8119	14.5578	13.9391	12.2743	17.8643	29.1124	34.5587	24.8157	30.0305	27.0557	25.6678	10.5907	10.6145	4.49031	6.85452	20.9872	5.99368	3.61731	5.18349	3.67039	9.50559	16.618	19.7806	12.9085	25.6915	27.0307	23.2701	23.4752	21.6727	25.7561	18.163	13.422	8.25044	15.765	9.84206	10.9204	15.0905	14.4027	25.4905	20.8144	28.2979	4.17947	3.44005	1.62346		580	18.1812	13.8697	20.3907
581	25.8233	14.4789	13.9288	12.2597	17.8436	29.055	34.657	24.8719	30.0357	27.0109	25.7216	10.6089	10.6439	4.46145	6.86672	20.9909	6.01597	3.60836	5.1919	3.68801	9.47265	16.6098	19.8203	12.9554	25.7389	27.0796	23.3337	23.4892	21.6186	25.7583	18.1794	13.4432	8.26596	15.73	9.77833	10.8495	14.9635	14.3319	25.5095	20.7796	28.3897	4.15273	3.46963	1.62008		581	18.1843	13.8572	20.6055
582	25.833	14.3998	13.9167	12.2445	17.8188	28.9953	34.7569	24.9273	30.0425	26.9637	25.7756	10.6288	10.6714	4.43346	6.87955	20.9944	6.03848	3.60137	5.19854	3.70616	9.44118	16.6018	19.8583	12.9997	25.7874	27.1276	23.397	23.5039	21.566	25.7593	18.1938	13.4646	8.28117	15.6953	9.71489	10.7762	14.8365	14.2616	25.5278	20.7459	28.4819	4.1264	3.49913	1.6182		582	18.1878	13.8472	20.8202
583	25.841	14.3207	13.9026	12.2289	17.7901	28.9333	34.8583	24.9819	30.0507	26.9139	25.8296	10.6505	10.697	4.40643	6.89291	20.9976	6.06115	3.59632	5.20335	3.72487	9.41129	16.5941	19.8944	13.0412	25.837	27.1747	23.4599	23.5193	21.515	25.7589	18.2062	13.4862	8.29609	15.6608	9.65186	10.7008	14.7093	14.1917	25.5453	20.7135	28.5744	4.10053	3.52841	1.61785		583	18.1918	13.8397	21.0346
584	25.8473	14.242	13.8867	12.2129	17.7575	28.8688	34.961	25.0355	30.0603	26.8616	25.8835	10.6739	10.7205	4.38047	6.90668	21.0005	6.08391	3.59316	5.20631	3.74416	9.38304	16.5869	19.9286	13.08	25.8877	27.2209	23.5222	23.5356	21.4656	25.7572	18.2167	13.5078	8.31073	15.6266	9.58933	10.6233	14.5821	14.1224	25.5621	20.6823	28.6669	4.07517	3.55737	1.61903		584	18.1964	13.8345	21.2482
585	25.8517	14.1641	13.8689	12.1966	17.7211	28.8021	35.0648	25.0881	30.0713	26.8068	25.9369	10.699	10.7419	4.35567	6.92078	21.003	6.10668	3.59184	5.20738	3.76405	9.35652	16.5801	19.9607	13.1159	25.9394	27.2661	23.5837	23.5526	21.4178	25.754	18.2251	13.5294	8.32513	15.5928	9.5274	10.544	14.4547	14.0536	25.5781	20.6523	28.7592	4.05036	3.58589	1.62175		585	18.2017	13.8318	21.4607
586	25.8543	14.0871	13.8494	12.18	17.6811	28.7331	35.1695	25.1396	30.0835	26.7497	25.9897	10.7259	10.761	4.3321	6.93509	21.0049	6.1294	3.59231	5.20653	3.78458	9.33178	16.5738	19.9907	13.149	25.992	27.3102	23.6443	23.5704	21.3716	25.7493	18.2316	13.5508	8.33929	15.5594	9.46615	10.463	14.3272	13.9854	25.5933	20.6237	28.8511	4.02615	3.61387	1.62599		586	18.2079	13.8315	21.6716
587	25.8549	14.0114	13.8281	12.1633	17.6376	28.6619	35.2748	25.1899	30.097	26.6903	26.0416	10.7544	10.7778	4.30985	6.94951	21.0061	6.152	3.59451	5.20373	3.80575	9.30888	16.5682	20.0185	13.1793	26.0454	27.3533	23.7039	23.589	21.3271	25.7431	18.2361	13.572	8.35325	15.5265	9.40568	10.3805	14.1994	13.9179	25.6077	20.5964	28.9424	4.0026	3.64119	1.63175		587	18.2151	13.8335	21.8807
588	25.8537	13.9374	13.8051	12.1465	17.5907	28.5886	35.3805	25.2389	30.1115	26.6286	26.0924	10.7847	10.7921	4.28899	6.96394	21.0065	6.17441	3.59837	5.19897	3.82758	9.28787	16.5633	20.044	13.2067	26.0994	27.3952	23.7623	23.6084	21.2843	25.7353	18.2387	13.5929	8.36701	15.4941	9.34608	10.2968	14.0715	13.851	25.6215	20.5705	29.0329	3.97975	3.66776	1.63901		588	18.2233	13.8378	22.0874
589	25.8504	13.8654	13.7804	12.1298	17.5406	28.5133	35.4865	25.2866	30.127	26.5648	26.142	10.8166	10.8039	4.26958	6.97828	21.0059	6.19656	3.60382	5.19223	3.85009	9.26881	16.5592	20.0672	13.2312	26.1541	27.4358	23.8192	23.6287	21.2432	25.7258	18.2393	13.6133	8.38059	15.4622	9.28741	10.212	13.9432	13.7848	25.6345	20.546	29.1224	3.95765	3.69348	1.64776		589	18.2327	13.8445	22.2915
590	25.8452	13.7956	13.7542	12.1131	17.4875	28.436	35.5924	25.3329	30.1434	26.4989	26.1901	10.8501	10.8131	4.25168	6.99243	21.0043	6.21838	3.61078	5.18349	3.8733	9.25171	16.5559	20.088	13.2529	26.2092	27.4752	23.8747	23.6498	21.2037	25.7147	18.238	13.6333	8.39402	15.4309	9.22976	10.1263	13.8147	13.7193	25.6469	20.5229	29.2107	3.93636	3.71824	1.65796		590	18.2433	13.8534	22.4926
591	25.8381	13.7283	13.7265	12.0966	17.4315	28.357	35.6982	25.3777	30.1606	26.431	26.2365	10.8853	10.8196	4.23534	7.0063	21.0016	6.2398	3.61918	5.17276	3.89721	9.23662	16.5535	20.1064	13.2717	26.2646	27.5132	23.9286	23.6717	21.166	25.7019	18.2349	13.6526	8.40731	15.4002	9.1732	10.0398	13.686	13.6545	25.6586	20.5014	29.2977	3.91592	3.74197	1.66959		591	18.2553	13.8645	22.6902
592	25.8289	13.6638	13.6974	12.0804	17.3728	28.2762	35.8036	25.4209	30.1785	26.3612	26.281	10.9221	10.8234	4.2206	7.01981	20.9974	6.26077	3.62892	5.16003	3.92183	9.22355	16.5521	20.1224	13.2878	26.3202	27.5498	23.9806	23.6945	21.13	25.6874	18.2298	13.6713	8.42047	15.3701	9.1178	9.95283	13.5569	13.5903	25.6698	20.4814	29.383	3.89639	3.76456	1.68261		592	18.2686	13.8778	22.8842
593	25.8177	13.6024	13.667	12.0645	17.3117	28.1938	35.9084	25.4626	30.197	26.2897	26.3235	10.9605	10.8245	4.2075	7.03286	20.9919	6.28123	3.63993	5.14531	3.94717	9.21252	16.5517	20.1359	13.3011	26.376	27.5848	24.0307	23.7181	21.0957	25.6712	18.223	13.6893	8.43352	15.3405	9.06361	9.86549	13.4275	13.5269	25.6804	20.463	29.4665	3.87781	3.78595	1.69699		593	18.2836	13.8933	23.074
594	25.8046	13.5443	13.6353	12.0489	17.2482	28.11	36.0123	25.5025	30.216	26.2166	26.3639	11.0005	10.8228	4.19605	7.04537	20.9847	6.3011	3.6521	5.12859	3.97323	9.20353	16.5524	20.1469	13.3116	26.4316	27.6183	24.0787	23.7425	21.063	25.6532	18.2143	13.7064	8.44647	15.3116	9.01069	9.77797	13.2979	13.4642	25.6906	20.4461	29.5481	3.86023	3.80605	1.71267		594	18.3	13.9109	23.2594
595	25.7895	13.4897	13.6025	12.0338	17.1827	28.025	36.1153	25.5408	30.2353	26.1419	26.4019	11.042	10.8182	4.18629	7.05728	20.9759	6.32035	3.66536	5.1099	4.00001	9.19659	16.5541	20.1554	13.3195	26.487	27.6501	24.1245	23.7678	21.0321	25.6334	18.2039	13.7227	8.45935	15.2833	8.9591	9.69045	13.1679	13.4021	25.7003	20.4309	29.6276	3.8437	3.82479	1.72961		595	18.3182	13.9306	23.4402
596	25.7724	13.4389	13.5686	12.0192	17.1154	27.9388	36.217	25.5772	30.2548	26.0658	26.4374	11.0851	10.8108	4.17823	7.06851	20.9651	6.33891	3.67959	5.08925	4.0275	9.19168	16.557	20.1615	13.3247	26.542	27.6802	24.168	23.7938	21.0029	25.6118	18.1917	13.738	8.47215	15.2556	8.90888	9.60308	13.0377	13.3407	25.7097	20.4173	29.7047	3.82827	3.84211	1.74776		596	18.3381	13.9523	23.6158
597	25.7533	13.3921	13.5337	12.0051	17.0464	27.8517	36.3174	25.6118	30.2744	25.9885	26.4703	11.1298	10.8005	4.17186	7.07901	20.9524	6.35673	3.6947	5.06667	4.0557	9.18878	16.561	20.1652	13.3274	26.5965	27.7084	24.209	23.8207	20.9753	25.5885	18.1779	13.7523	8.4849	15.2285	8.86006	9.51604	12.9072	13.2799	25.7188	20.4054	29.7793	3.81397	3.85794	1.76706		597	18.3597	13.9761	23.7862
598	25.7324	13.3495	13.498	11.9917	16.9761	27.7639	36.4161	25.6445	30.2941	25.9101	26.5004	11.1759	10.7873	4.16718	7.08871	20.9376	6.37378	3.7106	5.04217	4.08459	9.18789	16.5662	20.1664	13.3276	26.6504	27.7347	24.2475	23.8484	20.9494	25.5634	18.1624	13.7656	8.49761	15.202	8.81269	9.42947	12.7765	13.2198	25.7277	20.3951	29.8512	3.80086	3.87223	1.78744		598	18.3832	14.0019	23.951
599	25.7096	13.3112	13.4616	11.9789	16.9046	27.6755	36.513	25.6753	30.3136	25.8307	26.5277	11.2236	10.7713	4.1642	7.09758	20.9205	6.39001	3.72718	5.01579	4.11416	9.18897	16.5725	20.1654	13.3255	26.7033	27.759	24.2833	23.8769	20.9251	25.5365	18.1454	13.7777	8.51029	15.176	8.76678	9.34352	12.6455	13.1602	25.7365	20.3866	29.9204	3.78897	3.88494	1.80886		599	18.4085	14.0296	24.11
600	25.6849	13.2774	13.4244	11.9669	16.8321	27.5867	36.6079	25.704	30.3329	25.7506	26.5522	11.2727	10.7525	4.16288	7.10556	20.9011	6.40539	3.74434	4.98757	4.14439	9.19199	16.5801	20.162	13.321	26.7553	27.7813	24.3164	23.906	20.9025	25.5079	18.1267	13.7887	8.52295	15.1506	8.72236	9.25832	12.5144	13.1011	25.7452	20.3798	29.9866	3.77834	3.896	1.83124		600	18.4358	14.0592	24.2628
601	25.6584	13.2483	13.3868	11.9556	16.759	27.4977	36.7007	25.7307	30.3519	25.6698	26.5736	11.3233	10.7308	4.1632	7.11264	20.8792	6.41987	3.76198	4.95754	4.17527	9.1969	16.5889	20.1564	13.3143	26.806	27.8015	24.3466	23.936	20.8815	25.4776	18.1066	13.7984	8.5356	15.1257	8.67944	9.17401	12.3831	13.0426	25.7539	20.3747	30.0498	3.76901	3.9054	1.85451		601	18.4649	14.0908	24.4094
602	25.6301	13.2238	13.3487	11.9451	16.6854	27.4087	36.7911	25.7554	30.3704	25.5886	26.5919	11.3754	10.7063	4.16513	7.11878	20.8547	6.43345	3.78001	4.92576	4.20676	9.20367	16.5988	20.1487	13.3056	26.8554	27.8194	24.374	23.9666	20.8621	25.4456	18.085	13.8068	8.54826	15.1014	8.63804	9.0907	12.2517	12.9846	25.7627	20.3713	30.1097	3.761	3.9131	1.8786		602	18.4961	14.1241	24.5495
603	25.6001	13.2042	13.3102	11.9354	16.6116	27.32	36.8789	25.7778	30.3883	25.507	26.6072	11.4288	10.679	4.16865	7.12396	20.8275	6.44608	3.79832	4.89226	4.23883	9.21223	16.6099	20.1389	13.2948	26.9033	27.835	24.3984	23.9979	20.8443	25.412	18.0621	13.814	8.56093	15.0775	8.59815	9.00851	12.1203	12.9269	25.7717	20.3697	30.1664	3.75435	3.91908	1.90345		603	18.5293	14.1592	24.683
604	25.5684	13.1894	13.2715	11.9265	16.5378	27.2318	36.964	25.7981	30.4056	25.4254	26.6193	11.4836	10.649	4.17369	7.12818	20.7976	6.45776	3.81681	4.85711	4.27145	9.22254	16.6222	20.1271	13.2821	26.9495	27.8483	24.4198	24.0298	20.828	25.3767	18.0377	13.8197	8.57362	15.0541	8.55977	8.92753	11.9888	12.8696	25.7809	20.3698	30.2196	3.74908	3.92331	1.92898		604	18.5644	14.1961	24.8097
605	25.5351	13.1796	13.2327	11.9185	16.4643	27.1442	37.0462	25.8162	30.4222	25.3437	26.6282	11.5397	10.6163	4.18022	7.13143	20.7648	6.46848	3.83539	4.82035	4.30459	9.23454	16.6355	20.1134	13.2676	26.9939	27.8591	24.4382	24.0623	20.8132	25.3399	18.0121	13.8241	8.58636	15.0311	8.5229	8.84785	11.8574	12.8127	25.7903	20.3716	30.2694	3.7452	3.92578	1.95512		605	18.6016	14.2348	24.9294
606	25.5002	13.1747	13.1938	11.9114	16.3912	27.0574	37.1254	25.8319	30.4379	25.2624	26.634	11.5972	10.581	4.18819	7.13373	20.7291	6.47822	3.85397	4.78206	4.33821	9.24815	16.65	20.0979	13.2515	27.0362	27.8675	24.4536	24.0953	20.8	25.3016	17.9852	13.827	8.59913	15.0085	8.48752	8.76956	11.7261	12.756	25.8001	20.3751	30.3156	3.74276	3.92649	1.98179		606	18.6408	14.2751	25.042
607	25.4638	13.1748	13.1549	11.9052	16.3189	26.9718	37.2013	25.8454	30.4527	25.1814	26.6366	11.6559	10.5432	4.19753	7.13507	20.6904	6.48698	3.87245	4.74229	4.37226	9.26332	16.6655	20.0808	13.2339	27.0764	27.8734	24.4659	24.1289	20.7882	25.2618	17.9571	13.8285	8.61197	14.9864	8.45361	8.69272	11.5949	12.6995	25.8104	20.3804	30.3582	3.74174	3.92544	2.00891		607	18.6819	14.317	25.1475
608	25.4258	13.1799	13.1163	11.8998	16.2475	26.8874	37.2738	25.8565	30.4664	25.101	26.6361	11.7159	10.5029	4.20818	7.13548	20.6486	6.49477	3.89074	4.70112	4.40669	9.27995	16.6819	20.0621	13.2148	27.1143	27.8766	24.4751	24.1629	20.7779	25.2207	17.9278	13.8284	8.62486	14.9645	8.42115	8.61739	11.4641	12.6432	25.8211	20.3873	30.3971	3.74217	3.92262	2.03643		608	18.7251	14.3606	25.2458
609	25.3865	13.1898	13.0778	11.8954	16.1773	26.8045	37.3429	25.8652	30.4791	25.0214	26.6324	11.7771	10.4601	4.22008	7.13498	20.6037	6.50159	3.90877	4.65861	4.44146	9.29799	16.6994	20.042	13.1944	27.1496	27.8772	24.4814	24.1973	20.769	25.1783	17.8975	13.8269	8.63784	14.943	8.39011	8.54362	11.3335	12.5869	25.8323	20.396	30.4323	3.74404	3.91806	2.06425		609	18.7702	14.4057	25.3368
610	25.3457	13.2046	13.0397	11.8919	16.1085	26.7234	37.4082	25.8715	30.4907	24.9427	26.6257	11.8394	10.415	4.23315	7.13362	20.5556	6.50746	3.92644	4.61484	4.47651	9.31733	16.7176	20.0206	13.1729	27.1824	27.8752	24.4846	24.2321	20.7615	25.1346	17.8661	13.8237	8.6509	14.9218	8.36045	8.47145	11.2033	12.5307	25.844	20.4063	30.4637	3.74737	3.91177	2.09232		610	18.8173	14.4524	25.4206
611	25.3036	13.2241	13.0019	11.8892	16.0412	26.6441	37.4697	25.8753	30.501	24.8651	26.6159	11.9028	10.3677	4.24734	7.13142	20.5044	6.51238	3.94367	4.5699	4.51178	9.33792	16.7367	19.9979	13.1503	27.2124	27.8704	24.4849	24.2672	20.7554	25.0898	17.8337	13.8191	8.66406	14.9009	8.33213	8.40091	11.0736	12.4745	25.8564	20.4182	30.4915	3.75214	3.90377	2.12055		611	18.8663	14.5006	25.497
612	25.2603	13.2483	12.9647	11.8875	15.9757	26.5669	37.5273	25.8766	30.51	24.7888	26.6032	11.9673	10.3183	4.26255	7.12843	20.4499	6.5164	3.96041	4.52385	4.54722	9.35965	16.7566	19.9743	13.1268	27.2396	27.8629	24.4823	24.3026	20.7505	25.0439	17.8004	13.8128	8.67733	14.8802	8.30511	8.33203	10.9444	12.4183	25.8694	20.4317	30.5155	3.75835	3.89408	2.14889		612	18.9172	14.5502	25.5662
613	25.2157	13.2771	12.928	11.8866	15.9122	26.492	37.5809	25.8754	30.5178	24.714	26.5875	12.0328	10.2668	4.27872	7.1247	20.3923	6.51952	3.97656	4.47679	4.58277	9.38243	16.7771	19.9497	13.1025	27.2637	27.8526	24.4769	24.3382	20.747	24.9971	17.7662	13.8049	8.69072	14.8597	8.27935	8.2648	10.8159	12.3618	25.883	20.4468	30.5359	3.76599	3.88274	2.17726		613	18.9699	14.6013	25.6282
614	25.17	13.3103	12.892	11.8865	15.8509	26.4195	37.6302	25.8716	30.5242	24.6408	26.569	12.0992	10.2133	4.29577	7.12029	20.3315	6.52178	3.99208	4.42881	4.61836	9.40618	16.7982	19.9243	13.0774	27.2847	27.8396	24.4688	24.3739	20.7448	24.9494	17.7311	13.7953	8.70424	14.8394	8.25479	8.19923	10.6882	12.3053	25.8973	20.4634	30.5526	3.77503	3.86979	2.20561		614	19.0243	14.6537	25.6829
615	25.1231	13.3477	12.8566	11.8873	15.7919	26.3497	37.6753	25.8653	30.5292	24.5694	26.5478	12.1665	10.158	4.31362	7.11525	20.2674	6.52322	4.0069	4.37998	4.65392	9.43081	16.8198	19.8982	13.0518	27.3025	27.8238	24.458	24.4097	20.7438	24.9009	17.6953	13.7842	8.71791	14.8192	8.23137	8.13531	10.5612	12.2484	25.9123	20.4816	30.5656	3.78545	3.85526	2.23387		615	19.0805	14.7075	25.7306
616	25.0752	13.3892	12.8221	11.8889	15.7354	26.2826	37.7159	25.8563	30.5328	24.5	26.5239	12.2346	10.101	4.33219	7.10965	20.2002	6.52388	4.02096	4.33041	4.68938	9.45621	16.8418	19.8716	13.0258	27.317	27.8052	24.4448	24.4456	20.744	24.8518	17.6587	13.7714	8.73173	14.7992	8.20905	8.07303	10.4351	12.1913	25.928	20.5011	30.5752	3.79722	3.83919	2.26198		616	19.1384	14.7626	25.7713
617	25.0262	13.4346	12.7883	11.8913	15.6816	26.2184	37.7521	25.8447	30.5349	24.4326	26.4974	12.3035	10.0423	4.3514	7.10355	20.1299	6.52379	4.03421	4.28018	4.72468	9.4823	16.8641	19.8446	12.9994	27.328	27.7838	24.4291	24.4815	20.7453	24.802	17.6215	13.7569	8.74571	14.7792	8.18775	8.01236	10.3101	12.1339	25.9443	20.5221	30.5812	3.81031	3.82165	2.2899		617	19.1978	14.819	25.8051
618	24.9763	13.4836	12.7555	11.8945	15.6306	26.1573	37.7837	25.8304	30.5357	24.3675	26.4685	12.373	9.98217	4.37117	7.09703	20.0565	6.523	4.04661	4.2294	4.75974	9.50898	16.8867	19.8174	12.9727	27.3357	27.7597	24.4113	24.5173	20.7478	24.7519	17.5835	13.7407	8.75988	14.7594	8.16742	7.95328	10.1861	12.076	25.9612	20.5445	30.584	3.82469	3.80267	2.31757		618	19.2588	14.8767	25.8322
619	24.9254	13.5362	12.7235	11.8984	15.5825	26.0993	37.8107	25.8134	30.535	24.3048	26.4372	12.4432	9.92062	4.39143	7.09016	19.9801	6.52156	4.05812	4.17816	4.79449	9.53614	16.9094	19.79	12.9459	27.3397	27.7329	24.3913	24.5531	20.7513	24.7013	17.545	13.7229	8.77424	14.7396	8.14799	7.89573	10.0633	12.0178	25.9788	20.5681	30.5834	3.8403	3.78231	2.34495		619	19.3212	14.9356	25.8526
620	24.8735	13.592	12.6926	11.903	15.5374	26.0446	37.833	25.7937	30.5329	24.2446	26.4037	12.5138	9.85779	4.4121	7.08301	19.9008	6.51952	4.0687	4.12655	4.82885	9.5637	16.9321	19.7625	12.919	27.3402	27.7033	24.3694	24.5887	20.7558	24.6505	17.506	13.7034	8.7888	14.7198	8.12939	7.83969	9.94176	11.959	25.997	20.593	30.5797	3.8571	3.76064	2.372		620	19.385	14.9957	25.8667
621	24.8208	13.6508	12.6627	11.9083	15.4955	25.9932	37.8504	25.7713	30.5293	24.1871	26.3681	12.5849	9.79381	4.4331	7.07565	19.8186	6.51694	4.07833	4.07467	4.86276	9.59155	16.9548	19.7351	12.8922	27.3371	27.6711	24.3457	24.624	20.7614	24.5996	17.4664	13.6823	8.80359	14.7	8.11155	7.7851	9.82157	11.8998	26.0157	20.6192	30.573	3.87505	3.7377	2.39868		621	19.4501	15.0571	25.8744
622	24.7673	13.7124	12.6338	11.9143	15.4569	25.9453	37.8631	25.7462	30.5244	24.1323	26.3304	12.6564	9.7288	4.45436	7.06817	19.7337	6.51388	4.08698	4.02263	4.89612	9.6196	16.9773	19.708	12.8655	27.3304	27.6363	24.3204	24.6592	20.7678	24.5486	17.4264	13.6594	8.81861	14.6802	8.09441	7.73191	9.7028	11.84	26.0349	20.6464	30.5634	3.89407	3.71357	2.42496		622	19.5164	15.1195	25.8761
623	24.7129	13.7765	12.606	11.9208	15.4217	25.9009	37.8709	25.7184	30.518	24.0804	26.2909	12.7281	9.66289	4.47581	7.06064	19.6461	6.51038	4.09464	3.97053	4.92887	9.64775	16.9996	19.6811	12.839	27.32	27.5989	24.2937	24.6941	20.7752	24.4978	17.386	13.6349	8.83387	14.6603	8.07789	7.68006	9.58556	11.7796	26.0546	20.6748	30.5511	3.91412	3.68831	2.45081		623	19.5837	15.1832	25.872
624	24.6576	13.8428	12.5793	11.928	15.3898	25.86	37.8737	25.6878	30.5103	24.0314	26.2496	12.8	9.59621	4.49739	7.05315	19.5559	6.5065	4.10129	3.91846	4.96094	9.6759	17.0215	19.6547	12.8127	27.306	27.559	24.2658	24.7286	20.7834	24.4471	17.3451	13.6088	8.8494	14.6403	8.06192	7.62949	9.4699	11.7186	26.0747	20.7042	30.5363	3.93512	3.66197	2.47621		624	19.6521	15.2479	25.8621
625	24.6016	13.9111	12.5538	11.9357	15.3615	25.8226	37.8717	25.6545	30.5013	23.9855	26.2066	12.872	9.52887	4.51902	7.04576	19.4634	6.50232	4.10693	3.86653	4.99223	9.70395	17.043	19.6287	12.7868	27.2884	27.5166	24.2368	24.7629	20.7924	24.3967	17.304	13.581	8.86521	14.6202	8.04643	7.58013	9.35591	11.657	26.0951	20.7346	30.519	3.95701	3.63464	2.50115		625	19.7214	15.3138	25.8469
626	24.5448	13.9811	12.5294	11.9439	15.3367	25.7889	37.8647	25.6184	30.491	23.9427	26.1621	12.944	9.461	4.54065	7.03855	19.3686	6.49789	4.11156	3.81484	5.02269	9.73181	17.0639	19.6034	12.7612	27.2672	27.4719	24.207	24.7967	20.8021	24.3467	17.2626	13.5515	8.8813	14.6	8.03135	7.53192	9.24366	11.5947	26.1157	20.7658	30.4996	3.97971	3.60636	2.52562		626	19.7915	15.3808	25.8264
627	24.4873	14.0524	12.5062	11.9526	15.3155	25.7586	37.8527	25.5796	30.4794	23.9031	26.1161	13.0158	9.39273	4.56221	7.03161	19.2716	6.49326	4.11518	3.76349	5.05223	9.75939	17.0841	19.5787	12.736	27.2425	27.4249	24.1766	24.8302	20.8125	24.2972	17.2209	13.5205	8.8977	14.5796	8.01661	7.48479	9.13321	11.5317	26.1365	20.7979	30.4781	4.00315	3.57723	2.5496		627	19.8622	15.4489	25.8011
628	24.429	14.1249	12.4842	11.9617	15.2978	25.7319	37.8358	25.5382	30.4666	23.8668	26.0689	13.0874	9.32419	4.58365	7.025	19.1728	6.48851	4.11781	3.71259	5.08079	9.78658	17.1037	19.5548	12.7113	27.2143	27.3757	24.1457	24.8633	20.8235	24.2483	17.179	13.4878	8.91442	14.5589	8.00213	7.43868	9.02463	11.4681	26.1573	20.8308	30.4548	4.02726	3.54729	2.57311		628	19.9336	15.5181	25.771
629	24.3699	14.1982	12.4634	11.9713	15.2838	25.7087	37.8139	25.494	30.4527	23.8338	26.0204	13.1588	9.25551	4.60493	7.01879	19.0721	6.4837	4.11945	3.66222	5.10828	9.8133	17.1224	19.5316	12.6871	27.1827	27.3244	24.1147	24.8959	20.835	24.2002	17.1369	13.4535	8.93146	14.5381	7.98785	7.39351	8.91798	11.4037	26.1782	20.8645	30.4299	4.05194	3.51662	2.59613		629	20.0054	15.5884	25.7364
630	24.31	14.272	12.4438	11.9813	15.2734	25.689	37.7871	25.4471	30.4376	23.8041	25.9709	13.2297	9.1868	4.62599	7.01307	18.9698	6.47887	4.12013	3.61249	5.13464	9.83946	17.1402	19.5094	12.6633	27.1478	27.2711	24.0836	24.9281	20.847	24.1528	17.0947	13.4177	8.94885	14.5169	7.9737	7.34921	8.81329	11.3386	26.1989	20.8987	30.4035	4.07712	3.48528	2.61869		630	20.0776	15.6598	25.6977
631	24.2493	14.346	12.4254	11.9917	15.2666	25.6725	37.7554	25.3976	30.4214	23.7778	25.9204	13.3001	9.11819	4.64678	7.00788	18.8661	6.47411	4.11988	3.5635	5.1598	9.86496	17.157	19.4881	12.6401	27.1096	27.2159	24.0527	24.9599	20.8594	24.1063	17.0524	13.3804	8.96659	14.4955	7.95961	7.30572	8.71063	11.2728	26.2195	20.9336	30.376	4.10272	3.45335	2.64079		631	20.15	15.7323	25.655
632	24.1879	14.4201	12.4082	12.0024	15.2634	25.6593	37.7188	25.3455	30.4042	23.7548	25.869	13.3699	9.04981	4.66728	7.0033	18.7611	6.46946	4.11873	3.51534	5.1837	9.88973	17.1728	19.4677	12.6175	27.0684	27.1588	24.0223	24.9912	20.8722	24.0608	17.0101	13.3415	8.9847	14.4737	7.94552	7.26298	8.61002	11.2063	26.2397	20.969	30.3474	4.12863	3.42088	2.66246		632	20.2226	15.8059	25.6086
633	24.1257	14.4938	12.3922	12.0134	15.2638	25.6493	37.6773	25.2907	30.386	23.7353	25.8169	13.4389	8.98179	4.68745	6.99938	18.6552	6.46498	4.11671	3.46811	5.20627	9.91366	17.1874	19.4484	12.5953	27.0243	27.1001	23.9924	25.0222	20.8852	24.0164	16.9677	13.3011	9.00319	14.4515	7.93137	7.22092	8.51151	11.1391	26.2596	21.0049	30.318	4.15478	3.38795	2.68372		633	20.2952	15.8806	25.5589
634	24.0626	14.5669	12.3774	12.0248	15.2676	25.6423	37.631	25.2335	30.3669	23.7191	25.7641	13.5071	8.91423	4.70725	6.99618	18.5484	6.46072	4.11385	3.4219	5.22745	9.93668	17.2008	19.43	12.5737	26.9772	27.0398	23.9633	25.0527	20.8984	23.9731	16.9253	13.2593	9.02205	14.4288	7.91709	7.17947	8.41511	11.0711	26.2789	21.0412	30.288	4.18108	3.35462	2.70458		634	20.3677	15.9564	25.5059
635	23.9986	14.6392	12.3639	12.0364	15.2749	25.6382	37.58	25.1736	30.3468	23.7063	25.7107	13.5744	8.84726	4.72666	6.99376	18.441	6.45676	4.11022	3.3768	5.24719	9.95871	17.2129	19.4128	12.5526	26.9276	26.978	23.9353	25.0828	20.9118	23.931	16.883	13.2161	9.04131	14.4057	7.90262	7.13859	8.32084	11.0025	26.2977	21.0778	30.2577	4.20744	3.32094	2.7251		635	20.4399	16.0334	25.4501
636	23.9338	14.7103	12.3514	12.0483	15.2855	25.6368	37.5242	25.1114	30.3259	23.6968	25.6569	13.6407	8.78101	4.74565	6.99216	18.3332	6.45312	4.10585	3.33291	5.26542	9.97966	17.2237	19.3966	12.5319	26.8753	26.9149	23.9084	25.1126	20.9251	23.8901	16.8407	13.1716	9.06097	14.3821	7.88792	7.09821	8.22872	10.9331	26.3157	21.1147	30.2272	4.23377	3.28698	2.7453		636	20.5118	16.1115	25.3917
637	23.8681	14.78	12.3402	12.0605	15.2994	25.638	37.4638	25.0467	30.3042	23.6906	25.6027	13.7058	8.71558	4.76422	6.99143	18.2253	6.44988	4.10079	3.2903	5.2821	9.99947	17.2331	19.3814	12.5118	26.8208	26.8506	23.8828	25.142	20.9384	23.8506	16.7986	13.1257	9.08103	14.3579	7.87292	7.0583	8.13876	10.8631	26.3329	21.1519	30.1967	4.25997	3.2528	2.76521		637	20.5833	16.1908	25.3308
638	23.8014	14.8481	12.3301	12.0729	15.3166	25.6415	37.3987	24.9796	30.2817	23.6876	25.5482	13.7697	8.65109	4.78234	6.99161	18.1175	6.44707	4.09511	3.24907	5.29718	10.018	17.2411	19.3673	12.492	26.764	26.7852	23.8588	25.1711	20.9516	23.8125	16.7566	13.0785	9.10149	14.3331	7.85758	7.0188	8.05094	10.7923	26.3493	21.1892	30.1664	4.28597	3.21844	2.78489		638	20.6542	16.2713	25.2678
639	23.7338	14.9144	12.3212	12.0855	15.3368	25.6473	37.3292	24.9102	30.2585	23.6878	25.4935	13.8322	8.58765	4.8	6.99273	18.01	6.44474	4.08885	3.20929	5.31061	10.0353	17.2476	19.3543	12.4726	26.7052	26.7188	23.8364	25.1999	20.9646	23.7758	16.7148	13.03	9.12234	14.3076	7.84185	6.97967	7.96526	10.721	26.3646	21.2267	30.1365	4.31168	3.18398	2.80437		639	20.7243	16.353	25.2029
640	23.6651	14.9785	12.3134	12.0984	15.3601	25.655	37.2552	24.8386	30.2345	23.6911	25.4386	13.8933	8.52538	4.8172	6.99483	17.9031	6.44293	4.08209	3.17105	5.32237	10.0512	17.2525	19.3423	12.4535	26.6446	26.6516	23.8159	25.2285	20.9772	23.7406	16.6732	12.9805	9.1436	14.2813	7.82568	6.94088	7.88171	10.6489	26.3788	21.2643	30.1073	4.337	3.14945	2.8237		640	20.7937	16.436	25.1364
641	23.5953	15.0403	12.3067	12.1114	15.3862	25.6645	37.1768	24.7647	30.2098	23.6974	25.3838	13.9529	8.46438	4.83394	6.99793	17.7969	6.44169	4.07488	3.13441	5.3324	10.0657	17.256	19.3313	12.4348	26.5825	26.5837	23.7974	25.2569	20.9895	23.7069	16.6318	12.9297	9.16524	14.2543	7.80904	6.9024	7.80026	10.5763	26.3919	21.3019	30.0788	4.36187	3.11492	2.84293		641	20.8621	16.5202	25.0684
642	23.5245	15.0995	12.3012	12.1247	15.415	25.6755	37.094	24.6888	30.1845	23.7067	25.3289	14.0109	8.40476	4.85021	7.00205	17.6919	6.44104	4.0673	3.09946	5.34069	10.0786	17.2579	19.3213	12.4162	26.5189	26.5152	23.781	25.2852	21.0013	23.6747	16.5908	12.878	9.18727	14.2264	7.79189	6.86421	7.72088	10.503	26.4037	21.3395	30.0512	4.38619	3.08042	2.86211		642	20.9295	16.6057	24.9992
643	23.4525	15.1561	12.2966	12.1382	15.4465	25.6879	37.0071	24.6108	30.1584	23.7188	25.2741	14.0671	8.34663	4.86603	7.00721	17.5881	6.44104	4.05941	3.06626	5.3472	10.09	17.2582	19.3122	12.3978	26.454	26.4463	23.7667	25.3133	21.0125	23.6441	16.55	12.8252	9.20966	14.1976	7.77419	6.82628	7.64354	10.4292	26.4142	21.377	30.0248	4.40989	3.046	2.8813		643	20.9957	16.6926	24.9291
644	23.3792	15.2097	12.2932	12.1519	15.4805	25.7013	36.916	24.5308	30.1317	23.7337	25.2195	14.1216	8.29007	4.88139	7.01343	17.4859	6.4417	4.05127	3.03488	5.35192	10.0998	17.2569	19.3041	12.3795	26.3882	26.3772	23.7548	25.3415	21.023	23.6151	16.5096	12.7715	9.2324	14.1678	7.75592	6.7886	7.5682	10.3547	26.4232	21.4144	29.9996	4.4329	3.01171	2.90053		644	21.0606	16.7808	24.8581
645	23.3048	15.2602	12.2908	12.1658	15.5167	25.7156	36.8208	24.4489	30.1043	23.7512	25.1652	14.1742	8.23519	4.89631	7.02071	17.3855	6.44306	4.04298	3.00537	5.35483	10.1078	17.254	19.2968	12.3613	26.3216	26.3078	23.7454	25.3696	21.0328	23.5876	16.4696	12.7169	9.25547	14.1369	7.73704	6.75117	7.4948	10.2798	26.4308	21.4517	29.9757	4.45514	2.97758	2.91987		645	21.1242	16.8703	24.7866
646	23.229	15.3075	12.2894	12.1799	15.5552	25.7305	36.7216	24.3652	30.0762	23.7711	25.1111	14.2249	8.18209	4.9108	7.02906	17.2871	6.44515	4.03459	2.97781	5.35591	10.1142	17.2496	19.2903	12.343	26.2544	26.2385	23.7384	25.3979	21.0418	23.5618	16.43	12.6615	9.27884	14.1049	7.71753	6.71399	7.4233	10.2042	26.4368	21.4889	29.9534	4.47655	2.94366	2.93936		646	21.1863	16.9613	24.7147
647	23.1518	15.3515	12.289	12.1942	15.5957	25.7457	36.6185	24.2797	30.0474	23.7935	25.0574	14.2736	8.13086	4.92488	7.03847	17.1911	6.44798	4.02618	2.95224	5.35516	10.1187	17.2435	19.2845	12.3247	26.1867	26.1693	23.734	25.4262	21.0498	23.5375	16.3909	12.6054	9.30248	14.0717	7.69738	6.67705	7.35363	10.1282	26.4413	21.5258	29.9326	4.49706	2.90999	2.95906		647	21.2467	17.0537	24.6426
648	23.0733	15.3919	12.2896	12.2088	15.638	25.761	36.5116	24.1926	30.0179	23.818	25.0041	14.3202	8.08158	4.93856	7.04895	17.0976	6.45157	4.01784	2.92872	5.35257	10.1215	17.2359	19.2795	12.3061	26.119	26.1003	23.7321	25.4547	21.0569	23.5149	16.3522	12.5487	9.32637	14.0372	7.67656	6.64038	7.28573	10.0517	26.4441	21.5626	29.9136	4.51662	2.87659	2.97902		648	21.3055	17.1475	24.5704
649	22.9933	15.4287	12.2912	12.2236	15.6819	25.7761	36.401	24.1039	29.9877	23.8447	24.9513	14.3646	8.03434	4.95187	7.06048	17.0068	6.45595	4.00962	2.90729	5.34816	10.1223	17.2268	19.2751	12.2874	26.0512	26.0317	23.733	25.4835	21.0628	23.4938	16.3141	12.4914	9.35045	14.0014	7.65506	6.60398	7.21954	9.97467	26.4452	21.599	29.8963	4.53518	2.8435	2.99928		649	21.3624	17.2428	24.4984
650	22.9117	15.4618	12.2937	12.2387	15.7274	25.7908	36.2867	24.0136	29.9567	23.8733	24.899	14.4069	7.98923	4.96482	7.07305	16.9191	6.46113	4.00162	2.88801	5.34192	10.1212	17.2162	19.2713	12.2683	25.9836	25.9636	23.7365	25.5126	21.0676	23.4742	16.2766	12.4336	9.37469	13.9641	7.63287	6.56788	7.15498	9.89719	26.4446	21.6352	29.8809	4.55267	2.81075	3.01989		650	21.4174	17.3396	24.4267
651	22.8286	15.4912	12.2972	12.2541	15.7742	25.8048	36.1689	23.922	29.9249	23.9037	24.8472	14.4469	7.94632	4.97744	7.08664	16.8347	6.46712	3.99389	2.8709	5.33387	10.1182	17.204	19.268	12.2488	25.9164	25.8961	23.7427	25.542	21.0711	23.4562	16.2396	12.3755	9.39904	13.9253	7.60999	6.53211	7.09198	9.81925	26.4423	21.6711	29.8673	4.56907	2.77837	3.0409		651	21.4704	17.4378	24.3554
652	22.7439	15.5166	12.3016	12.2697	15.8221	25.8178	36.0475	23.829	29.8922	23.9357	24.7961	14.4846	7.90569	4.98975	7.10124	16.7538	6.47392	3.98653	2.856	5.32404	10.1131	17.1905	19.2652	12.2289	25.8499	25.8295	23.7516	25.5718	21.0733	23.4397	16.2032	12.317	9.42344	13.8848	7.58641	6.4967	7.03046	9.74087	26.4382	21.7066	29.8556	4.58433	2.7464	3.06234		652	21.5213	17.5376	24.2846
653	22.6575	15.5382	12.3068	12.2857	15.8709	25.8297	35.9228	23.7347	29.8586	23.9692	24.7457	14.52	7.86741	5.00179	7.11682	16.6766	6.48155	3.9796	2.84336	5.31243	10.1061	17.1755	19.2627	12.2084	25.7841	25.7637	23.7631	25.6021	21.074	23.4246	16.1676	12.2584	9.44782	13.8427	7.56213	6.46168	6.97033	9.66205	26.4324	21.7418	29.8459	4.59842	2.71484	3.08426		653	21.57	17.6388	24.2146
654	22.5695	15.5559	12.313	12.302	15.9205	25.8401	35.7948	23.6393	29.824	24.004	24.696	14.553	7.83155	5.01356	7.13336	16.6032	6.49	3.97318	2.83299	5.29909	10.097	17.1592	19.2606	12.1874	25.7192	25.699	23.7774	25.6328	21.0734	23.4109	16.1326	12.1996	9.47213	13.7988	7.53715	6.4271	6.91153	9.58281	26.4248	21.7767	29.8381	4.61131	2.68374	3.10669		654	21.6165	17.7416	24.1453
655	22.4796	15.5695	12.32	12.3187	15.9707	25.8489	35.6635	23.5427	29.7884	24.0399	24.647	14.5836	7.79817	5.02511	7.15081	16.5341	6.49929	3.96733	2.82492	5.28404	10.0858	17.1417	19.2588	12.1658	25.6554	25.6355	23.7942	25.6641	21.0712	23.3987	16.0984	12.1408	9.4963	13.7531	7.51148	6.39301	6.85396	9.50315	26.4155	21.8111	29.8321	4.62297	2.65311	3.12965		655	21.6605	17.8459	24.0769
656	22.388	15.5793	12.3279	12.3357	16.0213	25.8557	35.5291	23.4452	29.7517	24.0768	24.5989	14.6118	7.76733	5.03646	7.16917	16.4692	6.5094	3.96213	2.81917	5.26732	10.0726	17.1229	19.2571	12.1434	25.5928	25.5732	23.8136	25.696	21.0674	23.3877	16.0649	12.0821	9.52023	13.7054	7.48513	6.35946	6.79753	9.42307	26.4045	21.8452	29.8281	4.6334	2.62298	3.15318		656	21.7021	17.9516	24.0096
657	22.2946	15.5851	12.3367	12.3532	16.072	25.8604	35.3916	23.3466	29.7138	24.1144	24.5516	14.6376	7.7391	5.04763	7.18837	16.4089	6.52033	3.95765	2.81577	5.24898	10.0572	17.1029	19.2556	12.1203	25.5317	25.5124	23.8354	25.7284	21.062	23.3781	16.0323	12.0236	9.54386	13.6556	7.4581	6.32649	6.74218	9.34257	26.3917	21.8789	29.8258	4.64258	2.59336	3.1773		657	21.7412	18.0589	23.9433
658	22.1992	15.5869	12.3463	12.3712	16.1228	25.8627	35.2512	23.2473	29.6747	24.1527	24.5052	14.6609	7.71352	5.05865	7.2084	16.3533	6.53208	3.95395	2.81471	5.22906	10.0397	17.0819	19.2542	12.0963	25.472	25.4531	23.8598	25.7615	21.0549	23.3697	16.0004	11.9654	9.56708	13.6038	7.43041	6.29418	6.68781	9.26165	26.3773	21.9122	29.8252	4.65051	2.56429	3.20202		658	21.7776	18.1676	23.8781
659	22.102	15.5849	12.3567	12.3897	16.1734	25.8624	35.1078	23.1471	29.6342	24.1913	24.4597	14.6817	7.69064	5.06955	7.22922	16.3025	6.54464	3.95109	2.81601	5.20761	10.0202	17.0598	19.2528	12.0715	25.4139	25.3955	23.8864	25.7953	21.0461	23.3624	15.9695	11.9075	9.58981	13.5497	7.40207	6.26257	6.63433	9.18031	26.3613	21.945	29.8263	4.65719	2.53577	3.22736		659	21.8113	18.2778	23.8142
660	22.0029	15.5791	12.368	12.4087	16.2236	25.8593	34.9616	23.0462	29.5923	24.2303	24.4152	14.7001	7.6705	5.08035	7.25077	16.2567	6.558	3.94914	2.81967	5.18469	9.99847	17.0368	19.2514	12.0458	25.3576	25.3397	23.9154	25.8297	21.0356	23.3562	15.9395	11.8502	9.61195	13.4933	7.37311	6.23175	6.58168	9.09854	26.3437	21.9774	29.8289	4.66261	2.50784	3.25333		660	21.8423	18.3894	23.7516
661	21.9017	15.5695	12.38	12.4283	16.2732	25.8532	34.8127	22.9446	29.5489	24.2692	24.3716	14.7161	7.65315	5.09108	7.27302	16.2161	6.57214	3.94816	2.8257	5.16036	9.97467	17.013	19.25	12.0192	25.3031	25.2858	23.9465	25.8648	21.0233	23.3511	15.9104	11.7935	9.63338	13.4346	7.34353	6.20176	6.52977	9.01634	26.3245	22.0095	29.833	4.66681	2.4805	3.27993		661	21.8705	18.5024	23.6903
662	21.7987	15.5562	12.3929	12.4486	16.3221	25.8439	34.6612	22.8424	29.504	24.3081	24.3291	14.7296	7.63861	5.10176	7.29593	16.1808	6.58706	3.9482	2.8341	5.13469	9.94877	16.9884	19.2484	11.9916	25.2504	25.2339	23.9797	25.9006	21.0092	23.347	15.8822	11.7374	9.65399	13.3734	7.31336	6.17268	6.47852	8.93369	26.3039	22.041	29.8383	4.66978	2.45377	3.30715		662	21.8957	18.6167	23.6304
663	21.6936	15.5394	12.4066	12.4695	16.3702	25.8312	34.507	22.7397	29.4573	24.3466	24.2876	14.7407	7.62691	5.11242	7.31945	16.1509	6.60273	3.94931	2.84485	5.10773	9.92077	16.9631	19.2466	11.9631	25.1997	25.1842	24.0149	25.9371	20.9933	23.3437	15.8551	11.6822	9.67367	13.3097	7.28263	6.14458	6.42785	8.85058	26.2819	22.0722	29.8447	4.67156	2.42769	3.33499		663	21.9181	18.7323	23.5719
664	21.5865	15.5191	12.4211	12.4912	16.4171	25.815	34.3504	22.6365	29.4089	24.3847	24.2472	14.7494	7.61809	5.12307	7.34353	16.1264	6.61913	3.95154	2.85795	5.07957	9.8907	16.9372	19.2447	11.9335	25.1509	25.1367	24.052	25.9743	20.9757	23.3413	15.829	11.6279	9.6923	13.2434	7.25134	6.11752	6.37771	8.767	26.2586	22.1029	29.8522	4.67216	2.40225	3.36344		664	21.9374	18.8491	23.5149
665	21.4774	15.4955	12.4364	12.5137	16.4628	25.795	34.1914	22.5329	29.3587	24.422	24.2079	14.7558	7.61215	5.13374	7.36814	16.1076	6.63626	3.95494	2.87339	5.05027	9.85858	16.9108	19.2426	11.9029	25.1042	25.0917	24.0908	26.0121	20.9563	23.3397	15.804	11.5746	9.70974	13.1744	7.21954	6.09159	6.32802	8.68292	26.234	22.1332	29.8604	4.67163	2.37749	3.39247		665	21.9536	18.9671	23.4594
666	21.3663	15.4686	12.4525	12.537	16.5071	25.7712	34.03	22.429	29.3065	24.4586	24.1697	14.7598	7.60912	5.14444	7.39323	16.0944	6.65408	3.95955	2.89115	5.01992	9.82444	16.884	19.2402	11.8713	25.0595	25.049	24.1312	26.0506	20.9352	23.3387	15.78	11.5225	9.72587	13.1027	7.18725	6.06685	6.27872	8.59834	26.2083	22.163	29.8693	4.66999	2.35342	3.42206		666	21.9668	19.0862	23.4054
667	21.2533	15.4387	12.4694	12.5613	16.5498	25.7435	33.8665	22.3247	29.2523	24.4941	24.1326	14.7615	7.609	5.1552	7.41875	16.0868	6.67258	3.9654	2.91121	4.98859	9.7883	16.8569	19.2375	11.8387	25.0168	25.009	24.1732	26.0897	20.9123	23.3384	15.7572	11.4715	9.74056	13.0281	7.15448	6.04337	6.22975	8.51323	26.1815	22.1924	29.8786	4.66728	2.33005	3.45218		667	21.9768	19.2063	23.3528
668	21.1382	15.4059	12.4871	12.5866	16.5909	25.7116	33.7008	22.2201	29.1959	24.5283	24.0966	14.761	7.61178	5.16602	7.44465	16.0851	6.69173	3.97255	2.93354	4.95637	9.75021	16.8295	19.2346	11.8051	24.9762	24.9717	24.2166	26.1294	20.8878	23.3386	15.7355	11.4219	9.75366	12.9507	7.12128	6.02122	6.18106	8.42757	26.1537	22.2213	29.8881	4.66356	2.30741	3.4828		668	21.9836	19.3274	23.3018
669	21.0211	15.3704	12.5057	12.613	16.63	25.6755	33.533	22.1154	29.1374	24.5613	24.0618	14.7582	7.61748	5.17692	7.4709	16.089	6.7115	3.981	2.95813	4.92335	9.7102	16.8021	19.2314	11.7705	24.9375	24.9372	24.2612	26.1697	20.8617	23.3393	15.7149	11.3738	9.76503	12.8704	7.08766	6.00047	6.13261	8.34134	26.125	22.2498	29.8976	4.65886	2.28551	3.51388		669	21.9872	19.4494	23.2524
670	20.9022	15.3323	12.5251	12.6406	16.6672	25.635	33.3633	22.0105	29.0766	24.5926	24.028	14.7534	7.62608	5.18791	7.49746	16.0988	6.73187	3.9908	2.98494	4.88961	9.66832	16.7747	19.2279	11.735	24.9008	24.9056	24.3071	26.2104	20.834	23.3404	15.6955	11.3271	9.77454	12.787	7.05365	5.98118	6.08434	8.25452	26.0955	22.2779	29.907	4.65323	2.26437	3.54538		670	21.9876	19.5721	23.2045
671	20.7813	15.2918	12.5454	12.6694	16.7023	25.5901	33.1917	21.9054	29.0135	24.6222	23.9954	14.7464	7.63756	5.19901	7.52427	16.1142	6.75281	4.00196	3.01394	4.85524	9.62462	16.7473	19.2242	11.6985	24.866	24.877	24.354	26.2516	20.8048	23.3418	15.6773	11.2821	9.78203	12.7007	7.01928	5.96343	6.03622	8.16708	26.0653	22.3055	29.9159	4.64674	2.24401	3.57723		671	21.9847	19.6955	23.1581
672	20.6585	15.2491	12.5665	12.6995	16.7351	25.5407	33.0184	21.8003	28.9479	24.65	23.9639	14.7374	7.65191	5.21022	7.55131	16.1354	6.77429	4.01451	3.04511	4.82034	9.57916	16.7201	19.2201	11.6612	24.833	24.8515	24.4018	26.2932	20.7742	23.3435	15.6603	11.2389	9.78735	12.6113	6.98458	5.94728	5.98822	8.079	26.0345	22.3327	29.9241	4.63942	2.22444	3.6094		672	21.9785	19.8195	23.1132
673	20.5339	15.2045	12.5885	12.7311	16.7656	25.4868	32.8435	21.6951	28.8798	24.6756	23.9334	14.7264	7.66909	5.22154	7.57854	16.1622	6.79628	4.02845	3.07839	4.78499	9.53199	16.6932	19.2158	11.623	24.8018	24.8292	24.4505	26.3351	20.7423	23.3453	15.6445	11.1974	9.79038	12.5187	6.94958	5.93278	5.94031	7.99025	26.0031	22.3594	29.9315	4.63135	2.20568	3.64183		673	21.9691	19.9439	23.0698
674	20.4075	15.1581	12.6114	12.7642	16.7937	25.4282	32.667	21.5899	28.8092	24.6991	23.9039	14.7135	7.68908	5.23298	7.60591	16.1947	6.81875	4.0438	3.11375	4.7493	9.48319	16.6667	19.2113	11.584	24.7723	24.8102	24.5	26.3773	20.7091	23.3472	15.6299	11.1579	9.79095	12.4231	6.9143	5.91999	5.89248	7.90082	25.9714	22.3857	29.9378	4.62258	2.18775	3.67444		674	21.9563	20.0687	23.028
675	20.2794	15.1101	12.6352	12.799	16.8192	25.3649	32.4892	21.4847	28.7359	24.7202	23.8755	14.6989	7.71182	5.24455	7.6334	16.2326	6.84166	4.06058	3.15115	4.71335	9.43282	16.6407	19.2065	11.5444	24.7443	24.7946	24.5501	26.4197	20.6748	23.3491	15.6165	11.1203	9.78892	12.3243	6.87877	5.90897	5.8447	7.81067	25.9394	22.4116	29.9428	4.61316	2.17066	3.70719		675	21.9402	20.1938	22.9876
676	20.1496	15.0608	12.66	12.8355	16.8421	25.297	32.31	21.3796	28.66	24.7387	23.8481	14.6824	7.73728	5.25624	7.66098	16.2759	6.86499	4.07877	3.19053	4.67725	9.38095	16.6153	19.2016	11.5041	24.7178	24.7824	24.6008	26.4623	20.6395	23.351	15.6044	11.0848	9.78414	12.2223	6.84301	5.89976	5.79697	7.71979	25.9071	22.437	29.9462	4.60317	2.15444	3.74		676	21.9209	20.3189	22.9487
677	20.0183	15.0104	12.6857	12.8739	16.8623	25.2243	32.1297	21.2746	28.5814	24.7546	23.8215	14.6643	7.7654	5.26805	7.68862	16.3246	6.88869	4.09838	3.23187	4.64109	9.32766	16.5906	19.1966	11.4632	24.6927	24.7738	24.6519	26.5049	20.6033	23.3527	15.5935	11.0515	9.77648	12.1172	6.80704	5.89242	5.74929	7.62815	25.8747	22.462	29.9479	4.59266	2.13908	3.77281		677	21.8983	20.4441	22.9113
678	19.8855	14.9591	12.7123	12.9143	16.8797	25.147	31.9484	21.1698	28.5	24.7677	23.7958	14.6446	7.79612	5.27999	7.7163	16.3783	6.91274	4.1194	3.27509	4.60496	9.27304	16.5667	19.1914	11.4218	24.6688	24.7687	24.7035	26.5476	20.5664	23.3542	15.5838	11.0204	9.7658	12.0089	6.77091	5.88697	5.70165	7.53574	25.8423	22.4866	29.9475	4.5817	2.12462	3.80553		678	21.8724	20.5692	22.8753
679	19.7512	14.9072	12.74	12.9568	16.8943	25.0649	31.7662	21.0652	28.4159	24.7779	23.7709	14.6234	7.82938	5.29205	7.74398	16.4371	6.93709	4.14183	3.32016	4.56896	9.21717	16.5437	19.1862	11.3801	24.646	24.7674	24.7554	26.5901	20.5289	23.3555	15.5753	10.9915	9.75196	11.8974	6.73461	5.88345	5.65406	7.44253	25.8099	22.5108	29.945	4.57035	2.11106	3.83811		679	21.8433	20.694	22.8407
680	19.6157	14.8548	12.7688	13.0016	16.9061	24.9782	31.5833	20.9608	28.3289	24.7849	23.7467	14.6007	7.86509	5.30422	7.77167	16.5007	6.96171	4.16566	3.36701	4.53318	9.16014	16.5218	19.181	11.338	24.6241	24.7698	24.8077	26.6325	20.4908	23.3565	15.568	10.9651	9.73484	11.7828	6.69819	5.8819	5.60653	7.34852	25.7777	22.5346	29.94	4.55866	2.09841	3.87045		680	21.811	20.8185	22.8076
681	19.479	14.8023	12.7986	13.0487	16.915	24.8868	31.3998	20.8568	28.239	24.7888	23.7231	14.5767	7.90319	5.3165	7.79933	16.569	6.98656	4.19086	3.41559	4.49773	9.10204	16.5009	19.1759	11.2957	24.603	24.776	24.8601	26.6746	20.4525	23.357	15.5619	10.941	9.7143	11.665	6.66165	5.88234	5.55909	7.25368	25.7458	22.558	29.9324	4.54671	2.0867	3.9025		681	21.7756	20.9424	22.7758
682	19.3411	14.7499	12.8295	13.0984	16.921	24.7907	31.2159	20.7531	28.1464	24.7893	23.7001	14.5514	7.94357	5.32889	7.82696	16.6417	7.0116	4.21742	3.46583	4.4627	9.04298	16.4812	19.1709	11.2534	24.5826	24.786	24.9128	26.7165	20.4139	23.3571	15.557	10.9194	9.69022	11.5441	6.62501	5.88479	5.51174	7.158	25.7141	22.5809	29.922	4.53454	2.07592	3.93417		682	21.7371	21.0658	22.7454
683	19.2023	14.6978	12.8616	13.1508	16.924	24.6902	31.0317	20.6499	28.0508	24.7863	23.6775	14.5249	7.98615	5.34136	7.85456	16.7187	7.0368	4.24532	3.51767	4.42817	8.98305	16.4628	19.166	11.2111	24.5628	24.7999	24.9657	26.7579	20.3754	23.3566	15.5533	10.9004	9.66251	11.4202	6.58831	5.88926	5.46451	7.06148	25.6828	22.6035	29.9087	4.52222	2.06609	3.96538		683	21.6955	21.1884	22.7164
684	19.0626	14.6463	12.8948	13.206	16.9241	24.5851	30.8475	20.5471	27.9524	24.7798	23.6553	14.4974	8.03083	5.35392	7.88212	16.7997	7.06211	4.27453	3.57106	4.39423	8.92236	16.4458	19.1615	11.1689	24.5432	24.8178	25.0187	26.7989	20.337	23.3556	15.5507	10.8838	9.63105	11.2933	6.55154	5.89575	5.41744	6.96412	25.652	22.6258	29.8922	4.5098	2.05722	3.99606		684	21.651	21.3101	22.6887
685	18.9222	14.5956	12.9293	13.2641	16.9213	24.4757	30.6634	20.4449	27.8512	24.7697	23.6333	14.4688	8.07749	5.36656	7.90963	16.8845	7.08749	4.30502	3.62591	4.36099	8.86101	16.4303	19.1573	11.127	24.5239	24.8396	25.0718	26.8394	20.2989	23.3539	15.5492	10.8699	9.59575	11.1635	6.51474	5.90427	5.37055	6.8659	25.6217	22.6476	29.8724	4.49734	2.04931	4.02614		685	21.6035	21.4308	22.6623
686	18.7812	14.5459	12.965	13.3254	16.9156	24.3619	30.4795	20.3433	27.7471	24.7558	23.6114	14.4393	8.12603	5.37927	7.9371	16.9728	7.11291	4.33676	3.68217	4.32852	8.79911	16.4164	19.1534	11.0854	24.5047	24.8654	25.1251	26.8793	20.2612	23.3514	15.5488	10.8586	9.55652	11.0308	6.47791	5.91481	5.32388	6.76683	25.592	22.6692	29.8492	4.48489	2.04237	4.05553		686	21.5533	21.5504	22.6372
687	18.6398	14.4975	13.002	13.39	16.9069	24.244	30.2962	20.2424	27.6402	24.738	23.5895	14.4089	8.17632	5.39204	7.96454	17.0644	7.13832	4.36971	3.73975	4.2969	8.73678	16.4041	19.1501	11.0444	24.4853	24.8953	25.1785	26.9185	20.2243	23.3483	15.5494	10.85	9.51328	10.8952	6.44106	5.92735	5.27746	6.66692	25.5628	22.6904	29.8225	4.47249	2.0364	4.08418		687	21.5003	21.6687	22.6134
688	18.4981	14.4506	13.0403	13.458	16.8954	24.1219	30.1135	20.1424	27.5304	24.7163	23.5674	14.3778	8.22824	5.40485	7.99196	17.1591	7.16369	4.40384	3.79859	4.26623	8.67413	16.3936	19.1474	11.0041	24.4657	24.9291	25.2321	26.957	20.1881	23.3442	15.5511	10.844	9.46597	10.7569	6.40421	5.94188	5.23133	6.56617	25.5344	22.7113	29.7921	4.46019	2.0314	4.11201		688	21.4446	21.7857	22.5909
689	18.3563	14.4055	13.08	13.5296	16.8811	23.9959	29.9318	20.0433	27.4179	24.6906	23.5449	14.346	8.28166	5.41771	8.01938	17.2565	7.18897	4.43911	3.8586	4.23658	8.61127	16.385	19.1453	10.9645	24.4458	24.9669	25.2859	26.9948	20.153	23.3394	15.5537	10.8406	9.41454	10.6161	6.36737	5.95836	5.18554	6.46459	25.5067	22.7319	29.758	4.44803	2.02738	4.13895		689	21.3865	21.9012	22.5697
690	18.2145	14.3623	13.1212	13.6049	16.864	23.866	29.7511	19.9451	27.3027	24.6608	23.5221	14.3135	8.33643	5.43059	8.0468	17.3564	7.21413	4.47548	3.91972	4.20803	8.54833	16.3783	19.1439	10.9259	24.4252	25.0088	25.3398	27.0317	20.119	23.3335	15.5573	10.84	9.35894	10.4726	6.33055	5.97677	5.14013	6.36221	25.4797	22.7522	29.7201	4.43606	2.02432	4.16493		690	21.3259	22.015	22.5497
691	18.0729	14.3214	13.1637	13.6842	16.8442	23.7325	29.5717	19.8481	27.1848	24.6268	23.4986	14.2805	8.39241	5.4435	8.07426	17.4584	7.23913	4.51289	3.98185	4.18065	8.48541	16.3737	19.1434	10.8884	24.4041	25.0546	25.394	27.0678	20.0863	23.3268	15.5618	10.842	9.29914	10.3268	6.29376	5.99706	5.09514	6.25904	25.4534	22.7723	29.6783	4.42431	2.02224	4.18991		691	21.263	22.1272	22.531
692	17.9316	14.2828	13.2078	13.7676	16.8217	23.5955	29.3939	19.7524	27.0643	24.5887	23.4744	14.2471	8.44945	5.45641	8.10178	17.5624	7.26393	4.55132	4.04492	4.15451	8.42265	16.3711	19.1438	10.8521	24.3821	25.1043	25.4485	27.103	20.0551	23.319	15.5672	10.8468	9.23512	10.1786	6.25701	6.01917	5.05061	6.15511	25.428	22.7922	29.6326	4.4128	2.02111	4.21381		692	21.198	22.2376	22.5135
693	17.791	14.2468	13.2534	13.8552	16.7967	23.4551	29.2178	19.658	26.9411	24.5463	23.4492	14.2132	8.5074	5.46934	8.12938	17.668	7.28849	4.5907	4.10883	4.12968	8.36015	16.3708	19.1452	10.8172	24.3592	25.158	25.5034	27.1372	20.0255	23.3101	15.5734	10.8541	9.16687	10.0283	6.22029	6.04307	5.00659	6.05045	25.4033	22.8119	29.583	4.40157	2.02094	4.23659		693	21.1309	22.3461	22.4973
694	17.651	14.2136	13.3006	13.9471	16.7691	23.3116	29.0437	19.5652	26.8155	24.4996	23.423	14.1791	8.5661	5.48226	8.15709	17.7749	7.31278	4.631	4.17351	4.10622	8.29805	16.3727	19.1477	10.7839	24.3354	25.2156	25.5586	27.1706	19.9978	23.3001	15.5803	10.8641	9.0944	9.87591	6.18363	6.06867	4.96313	5.94509	25.3794	22.8315	29.5295	4.39065	2.02171	4.2582		694	21.062	22.4525	22.4823
695	17.512	14.1835	13.3494	14.0436	16.7391	23.1652	28.8717	19.4741	26.6874	24.4486	23.3954	14.1446	8.62539	5.49518	8.18495	17.8828	7.33675	4.67216	4.23885	4.0842	8.23645	16.377	19.1514	10.7522	24.3103	25.2769	25.6143	27.2029	19.972	23.289	15.588	10.8767	9.01774	9.72161	6.14702	6.09592	4.92027	5.83907	25.3563	22.8509	29.4721	4.38004	2.02341	4.27858		695	20.9913	22.5569	22.4685
696	17.3741	14.1565	13.3998	14.1448	16.7067	23.0159	28.7022	19.3847	26.5568	24.3932	23.3665	14.1099	8.68509	5.50809	8.21299	17.9914	7.36039	4.71412	4.30478	4.06366	8.17549	16.3837	19.1564	10.7223	24.2841	25.342	25.6705	27.2343	19.9483	23.2768	15.5963	10.8919	8.93691	9.56555	6.11046	6.12473	4.87805	5.73244	25.3339	22.8703	29.4108	4.36977	2.02604	4.2977		696	20.919	22.6591	22.456
697	17.2374	14.1328	13.4519	14.2508	16.6721	22.8642	28.5354	19.2974	26.424	24.3335	23.3359	14.0751	8.74505	5.52098	8.24124	18.1004	7.38366	4.75685	4.37119	4.04466	8.11527	16.3929	19.1627	10.6945	24.2565	25.4108	25.7272	27.2647	19.9268	23.2633	15.6053	10.9096	8.85197	9.40787	6.07397	6.15503	4.83651	5.62523	25.3123	22.8896	29.3457	4.35985	2.02956	4.31553		697	20.8453	22.759	22.4446
698	17.1023	14.1127	13.5058	14.3617	16.6353	22.7101	28.3713	19.2122	26.2889	24.2694	23.3035	14.0402	8.80508	5.53386	8.26976	18.2095	7.40652	4.80028	4.43799	4.02725	8.05593	16.4046	19.1706	10.6688	24.2276	25.4831	25.7846	27.2942	19.9077	23.2486	15.6148	10.9297	8.76298	9.24874	6.03754	6.18671	4.7957	5.51751	25.2914	22.9089	29.2768	4.35029	2.03397	4.33203		698	20.7704	22.8566	22.4346
699	16.9688	14.0962	13.5613	14.4777	16.5965	22.5539	28.2104	19.1294	26.1516	24.2009	23.2691	14.0051	8.86501	5.54672	8.29857	18.3185	7.42895	4.84436	4.50509	4.01146	7.99757	16.419	19.1799	10.6454	24.1972	25.5589	25.8427	27.3227	19.8911	23.2326	15.6249	10.9523	8.67	9.08833	6.00119	6.21969	4.75566	5.40932	25.2712	22.9283	29.2043	4.34109	2.03925	4.34717		699	20.6943	22.9518	22.4257
700	16.8373	14.0835	13.6186	14.5989	16.5557	22.3959	28.0528	19.049	26.0122	24.128	23.2326	13.9701	8.92466	5.55957	8.32771	18.4271	7.45093	4.88905	4.57238	3.99735	7.94032	16.4361	19.191	10.6245	24.1654	25.6381	25.9016	27.3503	19.8771	23.2154	15.6354	10.9773	8.57315	8.92679	5.9649	6.25386	4.71642	5.30073	25.2516	22.9477	29.1283	4.33225	2.04537	4.36093		700	20.6174	23.0446	22.4181
701	16.7077	14.0747	13.6777	14.7254	16.513	22.2363	27.8987	18.9715	25.8709	24.0508	23.1938	13.9351	8.98386	5.57241	8.35724	18.5349	7.47243	4.93428	4.63977	3.98494	7.88428	16.456	19.2037	10.6062	24.132	25.7206	25.9613	27.377	19.8658	23.1969	15.6462	11.0045	8.4725	8.7643	5.92868	6.28912	4.67802	5.1918	25.2327	22.9673	29.0488	4.32376	2.05231	4.3733
702	16.5805	14.0699	13.7386	14.8572	16.4685	22.0753	27.7484	18.8968	25.7276	23.9693	23.1525	13.9001	9.04242	5.58523	8.38718	18.6417	7.49343	4.98	4.70715	3.97427	7.82957	16.4786	19.2183	10.5906	24.0971	25.8062	26.022	27.4027	19.8573	23.177	15.6575	11.034	8.36819	8.60105	5.89254	6.32534	4.6405	5.0826	25.2142	22.9871	28.966	4.31563	2.06006	4.38426
703	16.4557	14.0693	13.8013	14.9945	16.4224	21.9133	27.602	18.8252	25.5825	23.8835	23.1086	13.8651	9.10017	5.59806	8.41758	18.7473	7.51391	5.02617	4.77442	3.96535	7.7763	16.5042	19.2348	10.578	24.0606	25.8948	26.0836	27.4277	19.8516	23.1559	15.669	11.0656	8.26035	8.43722	5.85648	6.36242	4.60389	4.9732	25.1962	23.0071	28.8801	4.30785	2.06858	4.3938
704	16.3335	14.0728	13.8658	15.1374	16.3747	21.7505	27.4598	18.757	25.4356	23.7935	23.0619	13.8303	9.15692	5.61089	8.44849	18.8513	7.53387	5.07272	4.84148	3.95822	7.72457	16.5327	19.2533	10.5685	24.0226	25.9862	26.1463	27.4519	19.8489	23.1334	15.6807	11.0993	8.14911	8.27299	5.82049	6.40022	4.56821	4.86367	25.1786	23.0274	28.7912	4.30038	2.07786	4.40193
705	16.2141	14.0806	13.9321	15.2858	16.3255	21.5871	27.3219	18.6923	25.2871	23.6993	23.0122	13.7955	9.2125	5.62373	8.47993	18.9536	7.55329	5.11961	4.90823	3.95288	7.67449	16.5641	19.2739	10.5621	23.983	26.0804	26.2101	27.4754	19.8493	23.1095	15.6926	11.135	8.03463	8.10855	5.78459	6.43862	4.5335	4.75409	25.1614	23.048	28.6994	4.29323	2.08786	4.40864
706	16.0978	14.0927	14.0002	15.4398	16.275	21.4235	27.1885	18.6314	25.1371	23.6009	22.9594	13.7608	9.26674	5.63659	8.51195	19.0539	7.57216	5.16679	4.97456	3.94936	7.62616	16.5986	19.2967	10.5592	23.9419	26.1771	26.2751	27.4982	19.8526	23.0844	15.7045	11.1725	7.91707	7.9441	5.74877	6.47748	4.49977	4.64454	25.1443	23.0689	28.6051	4.28638	2.09856	4.41395
707	15.9847	14.1092	14.0701	15.5994	16.2233	21.26	27.0599	18.5744	24.9857	23.4985	22.9033	13.7263	9.31946	5.64949	8.54458	19.1519	7.59048	5.2142	5.04037	3.94766	7.57967	16.6361	19.3217	10.5598	23.8993	26.2762	26.3413	27.5203	19.8591	23.0579	15.7166	11.2119	7.79662	7.77982	5.71303	6.51667	4.46706	4.53511	25.1275	23.0903	28.5084	4.27979	2.10994	4.41786
708	15.8749	14.13	14.1417	15.7647	16.1704	21.0968	26.9361	18.5216	24.8329	23.3922	22.8439	13.6918	9.37048	5.66244	8.57786	19.2476	7.60826	5.2618	5.10555	3.94777	7.53513	16.6767	19.3491	10.564	23.8553	26.3775	26.4087	27.542	19.8687	23.03	15.7286	11.2529	7.67346	7.6159	5.67739	6.55605	4.43538	4.42587	25.1107	23.1122	28.4094	4.27344	2.12196	4.42038
709	15.7687	14.1552	14.2151	15.9355	16.1164	20.9342	26.8173	18.4732	24.6788	23.2819	22.781	13.6575	9.41965	5.67545	8.61181	19.3406	7.62549	5.30954	5.17	3.94972	7.49261	16.7204	19.3789	10.5721	23.8099	26.4808	26.4775	27.5632	19.8814	23.0008	15.7405	11.2955	7.54779	7.45255	5.64184	6.59548	4.40475	4.31692	25.0938	23.1346	28.3084	4.26731	2.13461	4.42155
710	15.6661	14.1848	14.2902	16.112	16.0614	20.7726	26.7037	18.4294	24.5237	23.1679	22.7145	13.6232	9.46679	5.68854	8.64647	19.4307	7.64219	5.35738	5.23363	3.95348	7.4522	16.7673	19.4113	10.5841	23.7632	26.586	26.5476	27.584	19.8972	22.9704	15.7523	11.3396	7.41982	7.28995	5.60638	6.63481	4.37519	4.20835	25.0768	23.1576	28.2056	4.26137	2.14785	4.42138
711	15.5675	14.2187	14.367	16.2939	16.0056	20.6121	26.5955	18.3904	24.3675	23.0502	22.6442	13.589	9.51176	5.70172	8.68186	19.5179	7.65837	5.40526	5.29631	3.95905	7.41399	16.8174	19.4463	10.6001	23.7153	26.6929	26.619	27.6045	19.9162	22.9386	15.7639	11.3851	7.28976	7.12829	5.57103	6.6739	4.34671	4.10025	25.0596	23.1811	28.1013	4.25558	2.16165	4.41989
712	15.4728	14.2569	14.4453	16.4813	15.949	20.4532	26.4926	18.3564	24.2104	22.929	22.5702	13.5549	9.5544	5.71501	8.71798	19.602	7.67405	5.45315	5.35797	3.96642	7.37804	16.8706	19.4839	10.6204	23.6664	26.8012	26.6918	27.6248	19.9383	22.9055	15.7752	11.4318	7.15784	6.96776	5.53578	6.7126	4.31932	3.99271	25.0421	23.2054	27.9956	4.24993	2.17601	4.41713
713	15.3823	14.2993	14.5253	16.6739	15.8916	20.296	26.3953	18.3276	24.0526	22.8044	22.4923	13.5207	9.59457	5.72843	8.75487	19.6828	7.68926	5.501	5.41849	3.97557	7.34444	16.9271	19.5244	10.6451	23.6164	26.9108	26.766	27.6449	19.9634	22.8712	15.7862	11.4796	7.02429	6.80856	5.50064	6.75076	4.29303	3.88582	25.0241	23.2303	27.8888	4.24436	2.19089	4.41311
714	15.2961	14.3458	14.6067	16.8718	15.8336	20.141	26.3035	18.3042	23.894	22.6764	22.4104	13.4866	9.63213	5.742	8.79253	19.7602	7.70401	5.54878	5.47779	3.98648	7.31324	16.9868	19.5676	10.6742	23.5655	27.0215	26.8416	27.665	19.9916	22.8357	15.7969	11.5285	6.88933	6.65085	5.46562	6.78824	4.26785	3.77968	25.0056	23.256	27.7812	4.23885	2.20626	4.40789
715	15.2144	14.3964	14.6895	17.0747	15.7751	19.9883	26.2175	18.2864	23.7349	22.5454	22.3246	13.4523	9.66695	5.75573	8.83095	19.834	7.71835	5.59645	5.53576	3.99913	7.28451	17.0497	19.6139	10.708	23.514	27.1331	26.9186	27.6852	20.0227	22.799	15.8071	11.5782	6.75321	6.49483	5.43072	6.8249	4.24379	3.67438	24.9864	23.2825	27.6729	4.23337	2.22212	4.40149
716	15.1371	14.4509	14.7737	17.2825	15.7161	19.8383	26.1372	18.2742	23.5753	22.4114	22.2347	13.418	9.69891	5.76965	8.87015	19.9043	7.73231	5.64397	5.59233	4.0135	7.25831	17.1158	19.6632	10.7464	23.4617	27.2454	26.9969	27.7054	20.0567	22.7611	15.8169	11.6287	6.61618	6.34067	5.39596	6.86058	4.22085	3.57002	24.9664	23.3097	27.5642	4.22788	2.23844	4.39396
717	15.0645	14.5093	14.8591	17.4949	15.6566	19.6912	26.0626	18.268	23.4154	22.2746	22.1408	13.3836	9.72789	5.78377	8.91011	19.9708	7.74593	5.6913	5.6474	4.02955	7.23467	17.1852	19.7155	10.7897	23.409	27.3581	27.0766	27.7259	20.0935	22.7221	15.8261	11.6799	6.47848	6.18854	5.36133	6.89514	4.19903	3.46669	24.9455	23.3378	27.4553	4.22234	2.2552	4.38534
718	14.9967	14.5713	14.9457	17.7118	15.5967	19.5473	25.9939	18.2677	23.2553	22.1351	22.0428	13.3489	9.75379	5.79811	8.95082	20.0336	7.75927	5.73842	5.70088	4.04726	7.21366	17.2577	19.7711	10.8379	23.356	27.4712	27.1575	27.7467	20.1331	22.682	15.8347	11.7316	6.34036	6.0386	5.32684	6.92845	4.17835	3.36448	24.9236	23.3668	27.3464	4.21673	2.27239	4.37568
719	14.9337	14.6368	15.0333	17.9329	15.5366	19.4068	25.931	18.2736	23.0951	21.9932	21.9408	13.3141	9.77653	5.8127	8.99225	20.0925	7.77237	5.7853	5.7527	4.06658	7.19531	17.3335	19.83	10.8913	23.3028	27.5843	27.2398	27.7679	20.1753	22.6409	15.8428	11.7836	6.20206	5.89101	5.29252	6.96037	4.15879	3.26349	24.9006	23.3966	27.2378	4.211	2.29001	4.36502
720	14.8756	14.7056	15.1219	18.1578	15.4761	19.27	25.8739	18.2858	22.9349	21.8491	21.8348	13.2789	9.79601	5.82754	9.03439	20.1476	7.7853	5.83191	5.80279	4.08748	7.17964	17.4125	19.8922	10.9497	23.2496	27.6974	27.3232	27.7896	20.2199	22.5988	15.8501	11.836	6.06385	5.74592	5.25836	6.99076	4.14037	3.16381	24.8764	23.4273	27.1297	4.20513	2.30803	4.3534
721	14.8224	14.7777	15.2112	18.3864	15.4155	19.1372	25.8226	18.3042	22.7748	21.7029	21.7247	13.2433	9.81217	5.84266	9.07719	20.1989	7.79811	5.87822	5.85107	4.10993	7.16671	17.4946	19.9579	11.0134	23.1966	27.8101	27.4077	27.8118	20.267	22.5558	15.8567	11.8885	5.92596	5.60348	5.22438	7.0195	4.12309	3.06553	24.8509	23.4589	27.0222	4.19908	2.32644	4.34088
722	14.7743	14.8526	15.3013	18.6183	15.3546	19.0085	25.777	18.3291	22.6151	21.5548	21.6108	13.2074	9.82494	5.85807	9.12062	20.2462	7.81087	5.92421	5.89748	4.13387	7.15651	17.5798	20.0272	11.0825	23.1438	27.9224	27.4933	27.8346	20.3164	22.5118	15.8625	11.941	5.78865	5.46382	5.19059	7.04646	4.10694	2.96874	24.8239	23.4914	26.9156	4.19283	2.34526	4.32751
723	14.7313	14.9303	15.3919	18.8532	15.2936	18.8842	25.7371	18.3604	22.4558	21.4051	21.4929	13.1709	9.83427	5.87379	9.16463	20.2896	7.82366	5.96986	5.94195	4.15928	7.14908	17.6681	20.1	11.1571	23.0916	28.034	27.5799	27.8581	20.3678	22.4671	15.8675	11.9934	5.65215	5.32708	5.15699	7.07152	4.09192	2.87351	24.7955	23.5248	26.8101	4.18634	2.36447	4.31332
724	14.6934	15.0105	15.4829	19.0906	15.2325	18.7645	25.7027	18.3982	22.297	21.2541	21.3713	13.1339	9.84014	5.88983	9.20917	20.3291	7.83655	6.01515	5.98444	4.1861	7.14443	17.7595	20.1766	11.2371	23.0399	28.1448	27.6673	27.8824	20.4213	22.4216	15.8716	12.0456	5.51671	5.19337	5.12362	7.09458	4.07805	2.77995	24.7653	23.5591	26.7057	4.17959	2.38407	4.29838
725	14.6606	15.093	15.5741	19.3302	15.1713	18.6495	25.6739	18.4425	22.1388	21.1018	21.246	13.0963	9.84251	5.90621	9.25416	20.3648	7.84963	6.06007	6.02489	4.21429	7.14255	17.8539	20.257	11.3228	22.9891	28.2545	27.7556	27.9074	20.4766	22.3754	15.8749	12.0974	5.38255	5.06279	5.09047	7.11552	4.06532	2.68812	24.7335	23.5942	26.6028	4.17256	2.40407	4.28272
726	14.6329	15.1776	15.6655	19.5716	15.11	18.5394	25.6504	18.4933	21.9815	20.9486	21.1171	13.058	9.84137	5.92293	9.29955	20.3967	7.86297	6.1046	6.06327	4.24381	7.14346	17.9512	20.3413	11.4141	22.9393	28.3631	27.8445	27.9334	20.5336	22.3286	15.8771	12.1488	5.24992	4.93547	5.05756	7.13425	4.05373	2.59811	24.6999	23.6302	26.5014	4.16522	2.42448	4.2664
727	14.6103	15.2639	15.7569	19.8144	15.0487	18.4343	25.6322	18.5505	21.8251	20.7947	20.9847	13.0189	9.83672	5.94001	9.34525	20.4249	7.87667	6.14873	6.09954	4.2746	7.14715	18.0515	20.4296	11.5112	22.8906	28.4703	27.934	27.9603	20.5921	22.2812	15.8785	12.1996	5.11902	4.81147	5.02491	7.15068	4.04328	2.50999	24.6644	23.667	26.4017	4.15755	2.44529	4.24947
728	14.5929	15.3518	15.848	20.058	14.9873	18.3345	25.6191	18.6141	21.6698	20.6403	20.849	12.9791	9.82857	5.95746	9.39119	20.4493	7.89083	6.19246	6.13367	4.30663	7.15361	18.1546	20.522	11.6142	22.8433	28.5761	28.0239	27.9881	20.652	22.2333	15.8788	12.2497	4.99008	4.6909	4.99254	7.16472	4.03399	2.42384	24.6269	23.7046	26.3038	4.14954	2.46653	4.23196
729	14.5805	15.4409	15.9389	20.302	14.9258	18.24	25.6109	18.6839	21.5156	20.4857	20.7101	12.9383	9.81696	5.97527	9.43728	20.4701	7.90553	6.23577	6.16564	4.33984	7.16282	18.2605	20.6185	11.7229	22.7973	28.6802	28.1142	28.017	20.7131	22.185	15.878	12.299	4.8633	4.57381	4.96046	7.1763	4.02584	2.33971	24.5874	23.743	26.2078	4.14116	2.48821	4.21394
730	14.5732	15.531	16.0291	20.5459	14.8644	18.1508	25.6075	18.7599	21.3628	20.3312	20.5683	12.8966	9.80191	5.99345	9.48342	20.4873	7.92088	6.27867	6.19543	4.37419	7.17477	18.3691	20.7193	11.8376	22.753	28.7826	28.2046	28.0469	20.7752	22.1363	15.8762	12.3473	4.73888	4.46027	4.92869	7.18536	4.01886	2.25769	24.5459	23.782	26.1139	4.13242	2.51034	4.19543
731	14.5708	15.6218	16.1188	20.7892	14.803	18.0671	25.6087	18.842	21.2114	20.177	20.4235	12.8538	9.78347	6.01202	9.52952	20.5011	7.93699	6.32115	6.22305	4.40964	7.18943	18.4804	20.8244	11.9583	22.7105	28.8831	28.2951	28.0778	20.8381	22.0874	15.8733	12.3946	4.61701	4.35033	4.89724	7.19183	4.01304	2.17782	24.5022	23.8217	26.022	4.1233	2.53294	4.17649
732	14.5734	15.7131	16.2075	21.0315	14.7415	17.9889	25.6143	18.9299	21.0617	20.0233	20.2762	12.81	9.76172	6.03095	9.57546	20.5115	7.95395	6.36322	6.24849	4.44613	7.20677	18.5942	20.9339	12.0849	22.6699	28.9816	28.3855	28.1098	20.9017	22.0382	15.8693	12.4408	4.49786	4.24403	4.86615	7.19568	4.00839	2.10017	24.4563	23.862	25.9324	4.11379	2.55603	4.15716
733	14.5807	15.8045	16.2953	21.272	14.6801	17.9162	25.624	19.0234	20.9136	19.8705	20.1264	12.765	9.73672	6.05026	9.62114	20.5187	7.97188	6.40487	6.27177	4.48362	7.22676	18.7106	21.0479	12.2176	22.6313	29.078	28.4757	28.1428	20.9658	21.9889	15.8641	12.4858	4.3816	4.1414	4.83542	7.19686	4.00491	2.02479	24.4082	23.9028	25.845	4.1039	2.57964	4.13748
734	14.5929	15.8957	16.3818	21.5104	14.6186	17.8491	25.6376	19.1224	20.7674	19.7187	19.9743	12.7187	9.70856	6.06995	9.66644	20.5226	7.99089	6.44612	6.29289	4.52207	7.24936	18.8293	21.1666	12.3563	22.5949	29.1723	28.5654	28.177	21.0303	21.9395	15.8578	12.5294	4.26839	4.04246	4.80508	7.19535	4.00263	1.95173	24.3579	23.9441	25.7599	4.09361	2.60379	4.11748
735	14.6097	15.9865	16.467	21.746	14.5572	17.7875	25.655	19.2267	20.6232	19.5683	19.8202	12.6712	9.67733	6.08999	9.71125	20.5235	8.01109	6.48697	6.31189	4.56144	7.27452	18.9504	21.2899	12.5011	22.5607	29.2642	28.6547	28.2121	21.0948	21.8902	15.8504	12.5716	4.15837	3.94722	4.77515	7.19113	4.00153	1.88103	24.3053	23.9858	25.6772	4.08294	2.6285	4.09722
736	14.631	16.0765	16.5507	21.9783	14.4957	17.7315	25.6758	19.3358	20.481	19.4195	19.6642	12.6224	9.64316	6.11039	9.75544	20.5215	8.03259	6.52744	6.3288	4.60168	7.30221	19.0738	21.4179	12.6519	22.529	29.3539	28.7432	28.2483	21.1593	21.8409	15.8417	12.6122	4.05168	3.85568	4.74565	7.18419	4.00165	1.81274	24.2505	24.0277	25.5968	4.0719	2.6538	4.07672
737	14.6568	16.1656	16.6327	22.2068	14.4343	17.6808	25.6999	19.4496	20.3411	19.2726	19.5067	12.5722	9.60614	6.13114	9.79889	20.5167	8.0555	6.56753	6.34365	4.64275	7.33238	19.1992	21.5508	12.8088	22.4997	29.4411	28.8309	28.2854	21.2236	21.7918	15.8319	12.6513	3.94843	3.76782	4.71661	7.17454	4.00297	1.74689	24.1934	24.0699	25.5188	4.06048	2.67972	4.05602
738	14.6868	16.2534	16.7129	22.4308	14.3728	17.6355	25.7268	19.5678	20.2035	19.1278	19.3479	12.5206	9.56642	6.15222	9.84147	20.5091	8.07995	6.60728	6.35651	4.68462	7.36496	19.3268	21.6886	12.9718	22.473	29.5259	28.9175	28.3236	21.2875	21.743	15.8209	12.6887	3.84873	3.68363	4.68805	7.16219	4.00553	1.68351	24.1341	24.1123	25.4431	4.0487	2.70629	4.03516
739	14.721	16.3396	16.7911	22.6498	14.3114	17.5954	25.7564	19.6899	20.0684	18.9854	19.1879	12.4675	9.52413	6.17362	9.88305	20.499	8.10604	6.64668	6.36742	4.72725	7.3999	19.4562	21.8313	13.1408	22.449	29.6082	29.0031	28.3626	21.3508	21.6944	15.8087	12.7243	3.75267	3.60308	4.65999	7.14716	4.00932	1.62263	24.0725	24.1547	25.3698	4.03658	2.73353	4.01417
740	14.7592	16.424	16.8672	22.8632	14.2499	17.5605	25.7884	19.8157	19.9358	18.8456	19.027	12.4129	9.47943	6.19533	9.92351	20.4864	8.1339	6.68578	6.37645	4.7706	7.43715	19.5876	21.979	13.3158	22.4277	29.688	29.0873	28.4025	21.4133	21.6463	15.7953	12.7581	3.66034	3.52612	4.63247	7.12948	4.01435	1.56428	24.0089	24.197	25.2988	4.02414	2.76147	3.99307
741	14.8013	16.5063	16.9409	23.0705	14.1885	17.5305	25.8226	19.9447	19.806	18.7087	18.8655	12.3568	9.43245	6.21732	9.96271	20.4715	8.16362	6.72458	6.38367	4.81464	7.47663	19.7206	22.1319	13.4967	22.4091	29.7653	29.17	28.4432	21.4749	21.5986	15.7807	12.79	3.57181	3.4527	4.6055	7.10921	4.02065	1.50846	23.943	24.2392	25.2301	4.01139	2.79014	3.97191
742	14.847	16.5863	17.0123	23.2711	14.1271	17.5054	25.8585	20.0766	19.6788	18.5748	18.7036	12.2991	9.38338	6.23959	10.0005	20.4545	8.19534	6.76312	6.38916	4.85934	7.5183	19.8553	22.2898	13.6836	22.3934	29.84	29.2511	28.4846	21.5355	21.5514	15.765	12.8199	3.48712	3.38278	4.57911	7.0864	4.02821	1.4552	23.8751	24.2812	25.1636	3.99835	2.81957	3.95071
743	14.8962	16.6637	17.0811	23.4644	14.0656	17.4849	25.8959	20.2109	19.5546	18.4444	18.5416	12.2398	9.33238	6.26211	10.0368	20.4353	8.22915	6.80144	6.393	4.90467	7.56207	19.9915	22.4529	13.8764	22.3806	29.9122	29.3304	28.5266	21.5947	21.5048	15.7482	12.8478	3.40632	3.31628	4.55334	7.0611	4.03706	1.4045	23.8053	24.3229	25.0993	3.98506	2.84979	3.9295
744	14.9488	16.7383	17.1473	23.65	14.0042	17.4688	25.9347	20.3473	19.4333	18.3174	18.3797	12.1789	9.27962	6.28486	10.0715	20.4142	8.26516	6.83954	6.3953	4.9506	7.60788	20.1291	22.6213	14.0749	22.3707	29.9818	29.4079	28.5692	21.6526	21.4588	15.7302	12.8736	3.32944	3.25313	4.5282	7.03339	4.04719	1.35638	23.7335	24.3641	25.0371	3.97153	2.8808	3.9083
745	15.0046	16.8098	17.2107	23.8273	13.9429	17.457	25.9743	20.4852	19.315	18.1942	18.2182	12.1164	9.22529	6.30782	10.1045	20.3914	8.30348	6.87749	6.39614	4.99711	7.65566	20.268	22.7948	14.2792	22.3636	30.0489	29.4833	28.6122	21.7088	21.4136	15.7111	12.8973	3.25649	3.19325	4.50372	7.00335	4.05862	1.31082	23.6599	24.4049	24.977	3.9578	2.91265	3.88714
746	15.0632	16.878	17.2711	23.9957	13.8815	17.4491	26.0146	20.6242	19.1998	18.075	18.0573	12.0523	9.16957	6.33097	10.1355	20.3668	8.34422	6.9153	6.39563	5.04418	7.70534	20.408	22.9737	14.4892	22.3594	30.1135	29.5565	28.6557	21.7634	21.3691	15.691	12.9189	3.18748	3.13655	4.47994	6.97108	4.07135	1.26783	23.5846	24.445	24.9188	3.94389	2.94535	3.86605
747	15.1247	16.9428	17.3286	24.1549	13.8202	17.445	26.0554	20.7638	19.0878	17.96	17.8973	11.9866	9.11266	6.35428	10.1646	20.3407	8.38747	6.95302	6.39388	5.09177	7.75685	20.5492	23.1578	14.7047	22.3582	30.1757	29.6274	28.6993	21.816	21.3254	15.6698	12.9383	3.1224	3.08294	4.45687	6.93666	4.0854	1.2274	23.5077	24.4844	24.8625	3.92985	2.97891	3.84505
748	15.1887	17.0039	17.383	24.3043	13.759	17.4443	26.0962	20.9036	18.9791	17.8493	17.7383	11.9192	9.05474	6.37774	10.1916	20.3132	8.43332	6.99069	6.39101	5.13988	7.8101	20.6912	23.3471	14.9256	22.3598	30.2354	29.6959	28.7432	21.8666	21.2827	15.6476	12.9554	3.06122	3.03232	4.43456	6.90021	4.10076	1.18951	23.4293	24.523	24.8079	3.91569	3.01336	3.82417
749	15.255	17.0612	17.4343	24.4434	13.6978	17.4468	26.1368	21.043	18.8736	17.743	17.5807	11.8503	8.99601	6.40133	10.2164	20.2843	8.48187	7.02836	6.38714	5.18849	7.86503	20.834	23.5417	15.1519	22.3642	30.2928	29.7618	28.7871	21.9151	21.2408	15.6244	12.9703	3.00391	2.98459	4.41302	6.86184	4.11743	1.15416	23.3496	24.5607	24.7551	3.90147	3.0487	3.80342
750	15.3235	17.1145	17.4822	24.572	13.6367	17.4523	26.1769	21.1816	18.7714	17.6415	17.4247	11.7799	8.93667	6.42502	10.2389	20.2543	8.53319	7.06607	6.38239	5.23757	7.92157	20.9775	23.7416	15.3833	22.3714	30.3478	29.825	28.8309	21.9612	21.1999	15.6004	12.9829	2.95042	2.93963	4.39228	6.82166	4.13543	1.12131	23.2687	24.5975	24.7038	3.8872	3.08494	3.78282
751	15.3939	17.1637	17.5269	24.6894	13.5757	17.4603	26.2163	21.3188	18.6726	17.5447	17.2705	11.7079	8.87692	6.44879	10.259	20.2232	8.58738	7.10386	6.3769	5.28711	7.97963	21.1215	23.9466	15.6199	22.3814	30.4006	29.8855	28.8744	22.005	21.16	15.5754	12.9933	2.90071	2.89734	4.37236	6.77982	4.15474	1.09095	23.1868	24.6331	24.6541	3.87293	3.12209	3.7624
752	15.466	17.2086	17.5682	24.7955	13.5148	17.4706	26.2548	21.4542	18.5772	17.4528	17.1183	11.6344	8.81694	6.47261	10.2767	20.1911	8.64451	7.14179	6.37079	5.33711	8.03914	21.266	24.1569	15.8613	22.394	30.4512	29.9431	28.9177	22.0462	21.1211	15.5496	13.0014	2.85469	2.8576	4.3533	6.73643	4.17536	1.06306	23.104	24.6677	24.6057	3.85869	3.16015	3.74218
753	15.5396	17.2491	17.6062	24.8898	13.4541	17.4828	26.2919	21.5873	18.4852	17.3659	16.9684	11.5595	8.75694	6.49648	10.2918	20.1582	8.70463	7.17992	6.36421	5.38754	8.10003	21.4107	24.3722	16.1075	22.4093	30.4996	29.9978	28.9605	22.0847	21.0833	15.5231	13.0072	2.8123	2.82029	4.33512	6.69163	4.19728	1.03759	23.0205	24.701	24.5585	3.84452	3.19911	3.72218
754	15.6145	17.2851	17.6406	24.9721	13.3936	17.4967	26.3276	21.7175	18.3965	17.2841	16.8209	11.4832	8.69711	6.52037	10.3044	20.1246	8.76782	7.21828	6.35729	5.4384	8.16222	21.5556	24.5926	16.3583	22.4271	30.546	30.0495	29.0027	22.1204	21.0466	15.4959	13.0107	2.77345	2.78529	4.31784	6.64557	4.22049	1.01451	22.9365	24.733	24.5126	3.83045	3.23897	3.70241
755	15.6904	17.3166	17.6716	25.0419	13.3332	17.512	26.3615	21.8445	18.3113	17.2075	16.676	11.4056	8.63763	6.54426	10.3143	20.0904	8.83413	7.25695	6.35017	5.48968	8.22563	21.7004	24.8179	16.6135	22.4473	30.5904	30.098	29.0442	22.1533	21.011	15.468	13.0119	2.73804	2.75247	4.30149	6.59839	4.24498	0.993794	22.8523	24.7636	24.4677	3.81652	3.27971	3.68289
756	15.7672	17.3435	17.6991	25.0992	13.273	17.5282	26.3934	21.9676	18.2294	17.1362	16.534	11.3267	8.5787	6.56814	10.3216	20.0556	8.9036	7.29597	6.34299	5.54136	8.29021	21.8452	25.0481	16.8729	22.4698	30.6328	30.1434	29.0848	22.1832	20.9765	15.4395	13.011	2.70597	2.72172	4.28607	6.55024	4.27073	0.975392	22.7678	24.7928	24.4237	3.80277	3.32132	3.66364
757	15.8445	17.3656	17.7232	25.1437	13.2131	17.545	26.4232	22.0864	18.1508	17.0701	16.395	11.2466	8.5205	6.59199	10.3262	20.0204	8.97628	7.3354	6.3359	5.59344	8.35587	21.9896	25.2831	17.1363	22.4947	30.6734	30.1855	29.1245	22.21	20.9432	15.4105	13.0077	2.67713	2.69291	4.27162	6.50126	4.29772	0.959263	22.6835	24.8206	24.3806	3.78923	3.36376	3.64467
758	15.9223	17.3831	17.7437	25.1752	13.1534	17.5622	26.4505	22.2004	18.0756	17.0092	16.2592	11.1655	8.4632	6.6158	10.328	19.9849	9.05219	7.37531	6.32905	5.64592	8.42255	22.1337	25.5227	17.4035	22.5216	30.7122	30.2244	29.163	22.2337	20.911	15.3811	13.0023	2.65139	2.66592	4.25814	6.45162	4.32592	0.945361	22.5995	24.8467	24.3382	3.77593	3.40703	3.62601
759	16.0002	17.3958	17.7607	25.1936	13.094	17.5794	26.4752	22.3093	18.0036	16.9537	16.1268	11.0833	8.40698	6.63956	10.3271	19.9492	9.13136	7.41575	6.32257	5.69878	8.49018	22.2772	25.7668	17.6743	22.5506	30.7492	30.2599	29.2003	22.2541	20.8799	15.3513	12.9948	2.62863	2.64062	4.24566	6.40147	4.35531	0.933636	22.516	24.8713	24.2965	3.7629	3.45108	3.60766
760	16.078	17.4037	17.7743	25.1988	13.035	17.5963	26.4972	22.4126	17.9347	16.9034	15.9978	11.0002	8.352	6.66325	10.3235	19.9134	9.2138	7.45678	6.31661	5.75201	8.55868	22.42	26.0153	17.9484	22.5815	30.7847	30.2921	29.2362	22.2712	20.85	15.3212	12.9851	2.60871	2.6169	4.23417	6.35095	4.38585	0.924037	22.4332	24.8943	24.2553	3.75017	3.49587	3.58964
761	16.1556	17.4069	17.7844	25.1906	12.9763	17.6125	26.5161	22.5097	17.869	16.8584	15.8726	10.9163	8.29842	6.68688	10.3172	19.8775	9.29952	7.49847	6.31131	5.80561	8.62801	22.5619	26.2679	18.2256	22.6141	30.8185	30.321	29.2707	22.285	20.8212	15.2909	12.9734	2.59151	2.59463	4.2237	6.30022	4.41751	0.916509	22.3514	24.9155	24.2146	3.73778	3.54136	3.57197
762	16.2327	17.4054	17.791	25.1691	12.9179	17.6277	26.532	22.6005	17.8064	16.8185	15.7511	10.8316	8.2464	6.71043	10.3082	19.8416	9.38851	7.54088	6.30683	5.85957	8.69808	22.7029	26.5246	18.5056	22.6485	30.8508	30.3464	29.3035	22.2953	20.7935	15.2605	12.9596	2.57688	2.57369	4.21424	6.24944	4.45023	0.910998	22.2707	24.9351	24.1742	3.72575	3.58751	3.55465
763	16.3091	17.3992	17.7943	25.1343	12.8599	17.6416	26.5445	22.6843	17.7466	16.7837	15.6335	10.7464	8.19608	6.7339	10.2966	19.8059	9.48077	7.58406	6.30328	5.91389	8.76884	22.8428	26.785	18.7882	22.6843	30.8817	30.3685	29.3345	22.3021	20.7669	15.23	12.944	2.56468	2.55398	4.20579	6.19875	4.48399	0.907445	22.1915	24.9529	24.1341	3.7141	3.63426	3.53769
764	16.3846	17.3884	17.7942	25.0862	12.8024	17.654	26.5537	22.761	17.6898	16.7539	15.5199	10.6606	8.14758	6.75729	10.2824	19.7704	9.57627	7.62809	6.30082	5.96854	8.84024	22.9813	27.0491	19.0731	22.7216	30.9112	30.3872	29.3637	22.3053	20.7414	15.1995	12.9264	2.55474	2.53538	4.19836	6.14831	4.51872	0.905791	22.1138	24.969	24.0942	3.70286	3.68155	3.52112
765	16.459	17.373	17.7909	25.0249	12.7453	17.6645	26.5593	22.8302	17.6356	16.729	15.4104	10.5745	8.10105	6.7806	10.2657	19.7353	9.67498	7.67302	6.29957	6.02354	8.9122	23.1185	27.3166	19.3599	22.7601	30.9393	30.4025	29.391	22.305	20.717	15.1691	12.907	2.54694	2.51778	4.19193	6.09826	4.55438	0.905973	22.038	24.9833	24.0544	3.69205	3.72931	3.50493
766	16.532	17.3531	17.7842	24.9505	12.6887	17.6729	26.5612	22.8915	17.5841	16.7089	15.3051	10.4881	8.05661	6.80383	10.2465	19.7004	9.77686	7.7189	6.29967	6.07885	8.98468	23.2541	27.5873	19.6486	22.7998	30.9661	30.4145	29.4161	22.3011	20.6935	15.1389	12.8859	2.5411	2.50109	4.1865	6.04874	4.5909	0.90793	21.9643	24.9958	24.0146	3.68168	3.77749	3.48914
767	16.6036	17.3288	17.7744	24.8631	12.6326	17.6789	26.5594	22.9447	17.5351	16.6934	15.204	10.4016	8.01435	6.82698	10.2251	19.6661	9.88186	7.76581	6.30125	6.13448	9.05763	23.388	27.8609	19.9386	22.8404	30.9916	30.4231	29.4391	22.2935	20.671	15.109	12.8631	2.53708	2.48519	4.18206	5.99989	4.62823	0.911597	21.8929	25.0065	23.9748	3.67178	3.82601	3.47374
768	16.6734	17.3002	17.7614	24.763	12.577	17.6821	26.5537	22.9895	17.4884	16.6824	15.1073	10.3151	7.97438	6.85007	10.2013	19.6322	9.98993	7.81379	6.30442	6.1904	9.13098	23.52	28.1371	20.2297	22.8819	31.0159	30.4284	29.4599	22.2823	20.6494	15.0794	12.8388	2.53472	2.47001	4.17857	5.95184	4.6663	0.916909	21.824	25.0154	23.9349	3.66235	3.87478	3.45876
769	16.7414	17.2674	17.7454	24.6504	12.5219	17.6825	26.5442	23.0257	17.4439	16.6756	15.015	10.2287	7.93679	6.87309	10.1755	19.5989	10.101	7.8629	6.30931	6.24662	9.2047	23.6501	28.4157	20.5216	22.9241	31.039	30.4304	29.4783	22.2673	20.6287	15.0503	12.8129	2.53387	2.45544	4.17603	5.90473	4.70504	0.923799	21.7578	25.0225	23.8948	3.65341	3.92374	3.44419
770	16.8073	17.2305	17.7264	24.5255	12.4674	17.6798	26.5306	23.0531	17.4016	16.6729	14.927	10.1426	7.90167	6.89607	10.1477	19.5663	10.215	7.9132	6.31602	6.3031	9.27873	23.778	28.6965	20.814	22.967	31.061	30.4293	29.4943	22.2487	20.6088	15.0216	12.7857	2.53437	2.44141	4.1744	5.85866	4.74438	0.932202	21.6945	25.0278	23.8544	3.64496	3.97278	3.43003
771	16.8709	17.1896	17.7044	24.3887	12.4135	17.6738	26.5131	23.0715	17.3611	16.6741	14.8435	10.0568	7.86908	6.919	10.118	19.5344	10.3318	7.96473	6.32468	6.35984	9.35303	23.9036	28.979	21.1066	23.0103	31.0817	30.4249	29.5078	22.2264	20.5896	14.9936	12.7572	2.53607	2.42783	4.17366	5.81377	4.78423	0.942049	21.6343	25.0314	23.8138	3.63701	4.02184	3.41629
772	16.9321	17.1449	17.6795	24.2401	12.3602	17.6642	26.4915	23.0808	17.3224	16.679	14.7645	9.97159	7.83908	6.9419	10.0866	19.5032	10.4513	8.01755	6.33537	6.41682	9.42755	24.0268	29.2631	21.399	23.0539	31.1013	30.4175	29.5187	22.2004	20.5712	14.9662	12.7275	2.53882	2.41463	4.17375	5.77016	4.82453	0.953272	21.5775	25.0331	23.7729	3.62957	4.0708	3.40297
773	16.9907	17.0965	17.6518	24.0802	12.3075	17.6509	26.4658	23.0808	17.2852	16.6872	14.6899	9.88701	7.81174	6.96479	10.0537	19.4729	10.5735	8.07168	6.3482	6.47402	9.50225	24.1474	29.5484	21.6908	23.0977	31.1197	30.407	29.5271	22.1707	20.5534	14.9396	12.6967	2.54247	2.40174	4.17465	5.72793	4.86518	0.965803	21.5242	25.0331	23.7316	3.62263	4.11958	3.39007
774	17.0466	17.0446	17.6214	23.9094	12.2555	17.6338	26.436	23.0715	17.2495	16.6986	14.6197	9.80322	7.78709	6.98767	10.0193	19.4434	10.6983	8.12719	6.36325	6.53142	9.57709	24.2654	29.8346	21.9818	23.1416	31.1369	30.3935	29.5328	22.1373	20.5361	14.9137	12.6649	2.54688	2.38911	4.1763	5.68717	4.90611	0.979574	21.4745	25.0312	23.6899	3.61619	4.16808	3.37757
775	17.0996	16.9892	17.5884	23.728	12.2041	17.6127	26.4022	23.0528	17.215	16.7129	14.554	9.72034	7.76516	7.01057	9.98376	19.4149	10.8254	8.1841	6.38061	6.58899	9.65204	24.3805	30.1213	22.2716	23.1855	31.153	30.3771	29.5358	22.1002	20.5194	14.8887	12.6323	2.5519	2.37668	4.17866	5.64797	4.94722	0.994516	21.4287	25.0277	23.6477	3.61025	4.21619	3.36549
776	17.1495	16.9306	17.5527	23.5364	12.1534	17.5874	26.3643	23.0248	17.1816	16.7298	14.4927	9.6385	7.74599	7.03349	9.94715	19.3873	10.9548	8.24244	6.40036	6.64672	9.72704	24.4927	30.4083	22.5599	23.2293	31.1678	30.3579	29.5362	22.0596	20.5031	14.8647	12.5988	2.5574	2.36439	4.18167	5.61042	4.98843	1.01056	21.3868	25.0224	23.605	3.6048	4.26383	3.35381
777	17.1963	16.8689	17.5146	23.3351	12.1034	17.558	26.3223	22.9873	17.149	16.7491	14.4357	9.55782	7.72958	7.05646	9.9097	19.3607	11.0863	8.30225	6.42256	6.70458	9.80208	24.6017	30.6951	22.8462	23.2727	31.1814	30.336	29.5337	22.0153	20.4871	14.8417	12.5648	2.56324	2.3522	4.18526	5.57458	5.02964	1.02764	21.3491	25.0154	23.5619	3.59984	4.31087	3.34253
778	17.2398	16.8043	17.474	23.1246	12.0541	17.5243	26.2763	22.9406	17.1172	16.7705	14.383	9.47843	7.71594	7.07949	9.87157	19.3351	11.2199	8.36355	6.44728	6.76254	9.8771	24.7076	30.9814	23.1304	23.3159	31.1937	30.3114	29.5286	21.9675	20.4714	14.8197	12.5301	2.5693	2.34008	4.18938	5.54052	5.07077	1.04569	21.3156	25.0067	23.5182	3.59534	4.35722	3.33163
779	17.2799	16.7369	17.431	22.9054	12.0056	17.4862	26.2263	22.8845	17.0858	16.7936	14.3345	9.40044	7.70507	7.1026	9.83299	19.3107	11.3553	8.42635	6.47456	6.82058	9.95209	24.8101	31.267	23.4119	23.3585	31.2047	30.2842	29.5207	21.9162	20.4559	14.7989	12.495	2.57545	2.32799	4.19396	5.50828	5.11171	1.06465	21.2865	24.9963	23.4739	3.59131	4.40277	3.32111
780	17.3165	16.6669	17.3857	22.6778	11.9577	17.4436	26.1724	22.8193	17.0548	16.8181	14.2903	9.32397	7.69697	7.1258	9.79414	19.2873	11.4924	8.49066	6.50447	6.87867	10.027	24.9092	31.5514	23.6906	23.4006	31.2143	30.2545	29.51	21.8614	20.4406	14.7792	12.4596	2.58158	2.31591	4.19892	5.47791	5.15237	1.08444	21.2618	24.9842	23.4291	3.58772	4.44741	3.31095
781	17.3494	16.5945	17.3382	22.4426	11.9107	17.3967	26.1147	22.745	17.024	16.8439	14.25	9.24912	7.69161	7.14911	9.75523	19.265	11.6311	8.5565	6.53703	6.93678	10.1018	25.0048	31.8342	23.966	23.442	31.2225	30.2225	29.4967	21.8032	20.4252	14.7607	12.424	2.58757	2.3038	4.20418	5.44945	5.19266	1.105	21.2417	24.9704	23.3836	3.58455	4.49104	3.30114
782	17.3786	16.5197	17.2886	22.2	11.8644	17.3453	26.0531	22.6618	16.9931	16.8705	14.2138	9.17599	7.68896	7.17254	9.71647	19.2438	11.7712	8.62387	6.57228	6.99488	10.1765	25.0967	32.1152	24.2378	23.4826	31.2292	30.1882	29.4806	21.7417	20.4099	14.7434	12.3882	2.59333	2.29166	4.20968	5.42292	5.23249	1.12627	21.2262	24.955	23.3376	3.5818	4.53356	3.29167
783	17.404	16.4429	17.2368	21.9508	11.819	17.2894	25.9878	22.57	16.962	16.8976	14.1814	9.10468	7.68901	7.19611	9.67806	19.2238	11.9125	8.69275	6.61025	7.05293	10.251	25.1848	32.3939	24.5057	23.5224	31.2343	30.1517	29.4618	21.6769	20.3944	14.7274	12.3525	2.59874	2.27948	4.21533	5.39834	5.27175	1.14818	21.2153	24.938	23.2909	3.57944	4.57485	3.28252
784	17.4255	16.3641	17.183	21.6954	11.7743	17.229	25.9189	22.4696	16.9305	16.925	14.1528	9.03529	7.69169	7.21984	9.64021	19.2049	12.0548	8.76314	6.65094	7.11091	10.3253	25.2691	32.67	24.7693	23.5613	31.2377	30.1131	29.4404	21.6089	20.3787	14.7127	12.3168	2.60373	2.26724	4.22103	5.37573	5.31036	1.17069	21.2092	24.9194	23.2436	3.57745	4.61481	3.27368
785	17.4431	16.2835	17.1273	21.4343	11.7305	17.1643	25.8464	22.3609	16.8984	16.9522	14.1279	8.96788	7.69698	7.24372	9.60313	19.1872	12.1981	8.83501	6.69437	7.16879	10.3994	25.3494	32.9431	25.0284	23.5992	31.2395	30.0726	29.4165	21.5377	20.3627	14.6994	12.2813	2.6082	2.25495	4.22672	5.35507	5.34823	1.19372	21.2077	24.8991	23.1956	3.57581	4.65334	3.26511
786	17.4566	16.2012	17.0696	21.1682	11.6875	17.0951	25.7704	22.2442	16.8657	16.9791	14.1065	8.90254	7.70482	7.26778	9.56702	19.1706	12.342	8.90835	6.74054	7.22652	10.4733	25.4258	33.213	25.2826	23.6361	31.2394	30.0302	29.3899	21.4635	20.3464	14.6874	12.2462	2.61208	2.2426	4.23229	5.33637	5.38527	1.21722	21.2109	24.8772	23.147	3.5745	4.69035	3.25682
787	17.4661	16.1174	17.0101	20.8975	11.6454	17.0217	25.6911	22.1197	16.832	17.0053	14.0884	8.83933	7.71516	7.29203	9.53208	19.1551	12.4865	8.98313	6.78944	7.28409	10.5468	25.4981	33.4791	25.5316	23.6718	31.2375	29.986	29.3609	21.3863	20.3296	14.6767	12.2114	2.6153	2.23021	4.23766	5.3196	5.42138	1.24114	21.2188	24.8537	23.0977	3.57349	4.72573	3.24877
788	17.4715	16.0323	16.9488	20.6229	11.6043	16.9441	25.6085	21.9878	16.7973	17.0306	14.0736	8.77831	7.72793	7.31647	9.49852	19.1408	12.6313	9.05929	6.84105	7.34145	10.6201	25.5662	33.7413	25.7752	23.7063	31.2336	29.9401	29.3295	21.3062	20.3123	14.6674	12.177	2.61779	2.21778	4.24274	5.30475	5.45649	1.26542	21.2313	24.8286	23.0478	3.57277	4.75938	3.24094
789	17.4728	15.946	16.8857	20.3447	11.564	16.8623	25.5227	21.8487	16.7613	17.0545	14.0619	8.71954	7.74306	7.34111	9.46653	19.1276	12.7763	9.13681	6.89535	7.39858	10.693	25.6301	33.9992	26.013	23.7396	31.2276	29.8927	29.2958	21.2234	20.2945	14.6594	12.1432	2.61951	2.20533	4.24744	5.29177	5.49052	1.29001	21.2483	24.8019	22.9972	3.57231	4.79123	3.23332
790	17.47	15.8587	16.8211	20.0637	11.5248	16.7764	25.4339	21.7028	16.7241	17.0768	14.0531	8.66304	7.76049	7.36595	9.43628	19.1154	12.9213	9.21562	6.95232	7.45543	10.7656	25.6898	34.2523	26.2447	23.7716	31.2195	29.8439	29.2597	21.1378	20.276	14.6528	12.1101	2.6204	2.19287	4.25167	5.28064	5.52337	1.31487	21.2699	24.7736	22.946	3.5721	4.82117	3.22589
791	17.463	15.7704	16.7548	19.7803	11.4865	16.6866	25.3422	21.5505	16.6853	17.0973	14.047	8.60885	7.78014	7.391	9.40798	19.1043	13.0661	9.29566	7.0119	7.51199	10.8378	25.7453	34.5005	26.4702	23.8023	31.2092	29.7937	29.2215	21.0497	20.2568	14.6475	12.0776	2.62042	2.18043	4.25534	5.27129	5.55499	1.33994	21.2958	24.7436	22.8941	3.57209	4.84913	3.21861
792	17.4518	15.6813	16.6869	19.495	11.4492	16.593	25.2475	21.3919	16.6449	17.1157	14.0436	8.557	7.80194	7.41626	9.38179	19.0942	13.2106	9.37688	7.07407	7.56821	10.9096	25.7964	34.7434	26.6891	23.8316	31.1966	29.7423	29.1811	20.9591	20.2369	14.6436	12.0459	2.61953	2.16801	4.25836	5.26368	5.58531	1.36518	21.3261	24.7121	22.8416	3.57229	4.87502	3.21148
793	17.4365	15.5916	16.6176	19.2083	11.413	16.4957	25.1502	21.2276	16.6028	17.1317	14.0426	8.5075	7.82581	7.44172	9.35788	19.085	13.3546	9.45921	7.13877	7.62408	10.9809	25.8432	34.9807	26.9012	23.8595	31.1815	29.6898	29.1387	20.8661	20.2161	14.6409	12.0151	2.61772	2.15565	4.26064	5.25776	5.61425	1.39056	21.3604	24.679	22.7884	3.57265	4.89877	3.20447
794	17.4172	15.5013	16.5468	18.9209	11.3779	16.3948	25.0503	21.058	16.5588	17.145	14.0438	8.46036	7.85167	7.46739	9.3364	19.0768	13.4978	9.54255	7.20593	7.67955	11.0518	25.8856	35.2121	27.1063	23.8859	31.164	29.6363	29.0944	20.7708	20.1945	14.6395	11.9852	2.61496	2.14337	4.2621	5.25345	5.64176	1.41603	21.3988	24.6442	22.7346	3.57318	4.92031	3.19756
795	17.3937	15.4105	16.4746	18.633	11.344	16.2905	24.9479	20.8833	16.5128	17.1555	14.047	8.41556	7.87942	7.49325	9.31751	19.0695	13.6403	9.62683	7.2755	7.73461	11.1222	25.9238	35.4374	27.3041	23.9108	31.1438	29.5818	29.0483	20.6733	20.1719	14.6393	11.9561	2.61123	2.1312	4.26266	5.25068	5.66778	1.44156	21.4409	24.6078	22.6801	3.57384	4.93957	3.19074
796	17.3661	15.3195	16.4012	18.3453	11.3112	16.1829	24.843	20.704	16.4648	17.1628	14.0521	8.3731	7.90899	7.51931	9.30135	19.0629	13.7817	9.71197	7.3474	7.78922	11.1921	25.9576	35.6562	27.4946	23.9342	31.121	29.5266	29.0004	20.5738	20.1484	14.6404	11.9281	2.60653	2.11915	4.26224	5.24937	5.69226	1.46713	21.4867	24.5698	22.625	3.57461	4.9565	3.18397
797	17.3346	15.2282	16.3264	18.0581	11.2797	16.0723	24.7359	20.5205	16.4146	17.1668	14.0589	8.33294	7.94029	7.54555	9.28803	19.0571	13.9219	9.79786	7.42156	7.84337	11.2615	25.9871	35.8683	27.6774	23.9561	31.0955	29.4707	28.9509	20.4724	20.1239	14.6425	11.9011	2.60087	2.10727	4.26076	5.24946	5.71517	1.49269	21.536	24.5302	22.5694	3.57549	4.97103	3.17725
798	17.2992	15.1369	16.2505	17.772	11.2494	15.9586	24.6267	20.3332	16.3622	17.1672	14.0672	8.29507	7.97324	7.57196	9.27769	19.052	14.0608	9.8844	7.49789	7.89702	11.3302	26.0123	36.0734	27.8524	23.9764	31.0672	29.4141	28.8998	20.3692	20.0983	14.6458	11.8752	2.59423	2.09557	4.25816	5.25085	5.73646	1.51822	21.5884	24.4888	22.5131	3.57645	4.98312	3.17055
799	17.2598	15.0455	16.1735	17.4873	11.2205	15.8422	24.5154	20.1425	16.3075	17.164	14.0768	8.25944	8.00774	7.59853	9.27042	19.0475	14.1982	9.97149	7.57631	7.95017	11.3984	26.0333	36.2715	28.0195	23.9952	31.0361	29.3571	28.8472	20.2644	20.0717	14.6502	11.8503	2.58665	2.08409	4.25436	5.25346	5.75611	1.54371	21.6438	24.4459	22.4563	3.57749	4.99272	3.16387
800	17.2167	14.9541	16.0954	17.2044	11.193	15.7232	24.4021	19.9488	16.2504	17.1568	14.0874	8.226	8.0437	7.62525	9.26631	19.0436	14.334	10.059	7.65672	8.00278	11.466	26.0502	36.4621	28.1785	24.0123	31.002	29.2997	28.7933	20.1579	20.044	14.6555	11.8265	2.57812	2.07285	4.24931	5.2572	5.77409	1.56913	21.7019	24.4013	22.399	3.57858	4.9998	3.15719
801	17.1699	14.863	16.0163	16.9239	11.1668	15.6017	24.2871	19.7524	16.191	17.1456	14.099	8.19469	8.08105	7.6521	9.26545	19.0401	14.4681	10.1469	7.73903	8.05485	11.533	26.0629	36.6452	28.3294	24.0278	30.9649	29.242	28.7382	20.05	20.0151	14.6618	11.8039	2.56868	2.06187	4.24295	5.26198	5.79037	1.59448	21.7625	24.355	22.3411	3.57973	5.00433	3.15049
802	17.1195	14.772	15.9363	16.6459	11.1422	15.4779	24.1702	19.5539	16.1291	17.1302	14.1112	8.16545	8.11968	7.67906	9.2679	19.037	14.6003	10.2349	7.82314	8.10637	11.5993	26.0716	36.8206	28.4719	24.0416	30.9249	29.1842	28.6819	19.9409	19.9852	14.669	11.7823	2.55835	2.05119	4.23523	5.26771	5.80496	1.61973	21.8253	24.3071	22.2828	3.58091	5.00627	3.14376
803	17.0656	14.6814	15.8554	16.3709	11.1192	15.3519	24.0518	19.3535	16.0648	17.1105	14.124	8.13821	8.15952	7.70611	9.27372	19.0343	14.7305	10.3231	7.90894	8.15731	11.6649	26.0763	36.9881	28.6061	24.0539	30.8818	29.1262	28.6245	19.8305	19.9542	14.677	11.7619	2.54715	2.04082	4.22611	5.27429	5.81785	1.64489	21.8899	24.2575	22.224	3.58213	5.00561	3.137
804	17.0083	14.5911	15.7738	16.0991	11.0977	15.2241	23.9318	19.1517	15.998	17.0864	14.1371	8.11288	8.20048	7.73325	9.28294	19.0317	14.8586	10.4112	7.99632	8.20766	11.7298	26.0771	37.1475	28.7318	24.0644	30.8356	29.0682	28.5662	19.7191	19.922	14.6857	11.7425	2.53514	2.03079	4.21554	5.28164	5.82905	1.66994	21.9562	24.2062	22.1648	3.58337	5.00235	3.1302
805	16.9477	14.5013	15.6914	15.831	11.0779	15.0944	23.8103	18.9489	15.9287	17.0578	14.1503	8.0894	8.24247	7.76043	9.29559	19.0293	14.9844	10.4992	8.08518	8.25744	11.7939	26.0742	37.2988	28.8489	24.0733	30.7863	29.0103	28.507	19.6068	19.8887	14.6951	11.7243	2.52233	2.02111	4.2035	5.28966	5.83855	1.6949	22.0238	24.1533	22.1052	3.58463	4.99646	3.12335
806	16.8839	14.4119	15.6085	15.5668	11.0598	14.9632	23.6874	18.7453	15.857	17.0245	14.1635	8.06765	8.28542	7.78765	9.31169	19.027	15.108	10.5869	8.17539	8.30662	11.8573	26.0676	37.4418	28.9575	24.0805	30.734	28.9527	28.447	19.4937	19.8543	14.7052	11.7071	2.50878	2.01182	4.18996	5.29826	5.84638	1.71976	22.0923	24.0988	22.0453	3.58591	4.98796	3.11644
807	16.8172	14.3231	15.525	15.3067	11.0435	14.8305	23.5633	18.5414	15.7828	16.9867	14.1764	8.04756	8.32923	7.81489	9.33124	19.0246	15.2292	10.6742	8.26685	8.35521	11.92	26.0574	37.5765	29.0576	24.086	30.6785	28.8952	28.3864	19.38	19.8188	14.7158	11.691	2.49453	2.00291	4.1749	5.30735	5.85257	1.74453	22.1615	24.0426	21.9852	3.58721	4.97684	3.10949
808	16.7476	14.2349	15.4411	15.0511	11.0291	14.6965	23.438	18.3376	15.7062	16.9441	14.1889	8.02901	8.37382	7.84211	9.35422	19.0222	15.3479	10.7609	8.35944	8.4032	11.9818	26.0439	37.7027	29.149	24.0897	30.6199	28.8382	28.3251	19.2657	19.7823	14.7269	11.676	2.47962	1.99441	4.15832	5.31686	5.85714	1.76923	22.2311	23.9848	21.9247	3.58853	4.96313	3.10248
809	16.6752	14.1473	15.3569	14.8001	11.0166	14.5614	23.3115	18.1341	15.6272	16.8968	14.2008	8.01191	8.41912	7.86931	9.3806	19.0195	15.464	10.847	8.45303	8.45061	12.0429	26.027	37.8205	29.2319	24.0918	30.5583	28.7816	28.2634	19.151	19.7447	14.7385	11.6619	2.4641	1.98632	4.14019	5.32668	5.86014	1.79388	22.3007	23.9254	21.8642	3.58986	4.94683	3.09543
810	16.6003	14.0605	15.2723	14.5539	11.006	14.4254	23.184	17.9313	15.5459	16.8449	14.2119	7.99614	8.46505	7.89645	9.41034	19.0165	15.5775	10.9323	8.54751	8.49743	12.103	26.0069	37.9297	29.3062	24.0922	30.4936	28.7255	28.2012	19.0361	19.7061	14.7503	11.6489	2.44802	1.97866	4.12054	5.33676	5.86159	1.81849	22.37	23.8644	21.8035	3.59122	4.92798	3.08833
811	16.523	13.9743	15.1877	14.3128	10.9975	14.2886	23.0555	17.7295	15.4624	16.7882	14.2221	7.98161	8.51153	7.92351	9.4434	19.0132	15.6884	11.0167	8.64275	8.54368	12.1624	25.9839	38.0304	29.3719	24.0908	30.426	28.67	28.1386	18.921	19.6665	14.7625	11.6367	2.43144	1.97144	4.09936	5.347	5.86157	1.84309	22.4386	23.8019	21.7428	3.5926	4.90661	3.08119
812	16.4434	13.8889	15.1029	14.0769	10.991	14.1512	22.9261	17.529	15.3766	16.7268	14.2313	7.96819	8.55849	7.95048	9.4797	19.0094	15.7965	11.1001	8.73865	8.58936	12.2209	25.9579	38.1225	29.4292	24.0876	30.3553	28.6151	28.0758	18.8059	19.6259	14.7749	11.6255	2.4144	1.96464	4.07667	5.35735	5.86011	1.8677	22.5063	23.7379	21.6821	3.594	4.88275	3.07402
813	16.3617	13.8043	15.0183	13.8463	10.9867	14.0133	22.7957	17.33	15.2887	16.6608	14.2392	7.95578	8.60585	7.97732	9.51917	19.0051	15.9018	11.1823	8.83508	8.63449	12.2785	25.9293	38.2061	29.4781	24.0827	30.2818	28.5611	28.0128	18.6909	19.5845	14.7875	11.6151	2.39696	1.95828	4.0525	5.36773	5.85729	1.89237	22.5726	23.6724	21.6216	3.59544	4.85645	3.06683
814	16.2782	13.7204	14.9337	13.6213	10.9845	13.8751	22.6646	17.133	15.1988	16.5902	14.2457	7.94425	8.65355	8.00403	9.56172	19.0002	16.0043	11.2633	8.93191	8.67908	12.3352	25.8981	38.2812	29.5186	24.076	30.2055	28.5078	27.9496	18.5762	19.5422	14.8001	11.6056	2.37917	1.95235	4.02687	5.37809	5.85317	1.91713	22.6373	23.6054	21.5612	3.59691	4.82776	3.05963
815	16.1928	13.6375	14.8494	13.4018	10.9845	13.7366	22.5326	16.938	15.1069	16.5152	14.2508	7.93351	8.7015	8.03057	9.60724	18.9946	16.1039	11.3429	9.02904	8.72316	12.391	25.8646	38.3479	29.5509	24.0676	30.1264	28.4554	27.8864	18.4618	19.4991	14.8129	11.5969	2.36108	1.94685	3.99982	5.38837	5.84782	1.94202	22.7001	23.5371	21.5012	3.59842	4.79673	3.05244
816	16.106	13.5554	14.7655	13.188	10.9869	13.5982	22.4	16.7453	15.0131	16.4357	14.2543	7.92343	8.74966	8.05694	9.65563	18.9882	16.2007	11.4211	9.12635	8.76673	12.4459	25.8288	38.4062	29.575	24.0574	30.0447	28.404	27.8231	18.3479	19.4552	14.8256	11.5889	2.34274	1.94176	3.97139	5.39853	5.84132	1.96709	22.7606	23.4674	21.4415	3.59999	4.76342	3.04527
817	16.0177	13.4741	14.6821	12.98	10.9915	13.4599	22.2666	16.5553	14.9176	16.3519	14.256	7.9139	8.79794	8.08311	9.70676	18.981	16.2946	11.4976	9.22372	8.80982	12.4998	25.791	38.4562	29.5911	24.0454	29.9604	28.3535	27.7599	18.2345	19.4106	14.8382	11.5816	2.32421	1.93708	3.94162	5.40851	5.83375	1.99237	22.8186	23.3965	21.3823	3.6016	4.72789	3.03813
818	15.9282	13.3938	14.5992	12.7778	10.9984	13.3218	22.1326	16.3679	14.8204	16.264	14.2559	7.90482	8.84628	8.10906	9.76051	18.973	16.3856	11.5726	9.32104	8.85245	12.5528	25.7513	38.498	29.5992	24.0316	29.8736	28.3041	27.6968	18.1219	19.3654	14.8508	11.5749	2.30552	1.93279	3.91057	5.4183	5.82519	2.01793	22.8737	23.3243	21.3237	3.60327	4.69022	3.03105
819	15.8378	13.3144	14.5171	12.5816	11.0077	13.1841	21.998	16.1836	14.7217	16.1719	14.2539	7.89608	8.89462	8.13479	9.81673	18.9639	16.4737	11.6457	9.4182	8.89465	12.6049	25.7099	38.5317	29.5996	24.016	29.7845	28.2558	27.6339	18.0101	19.3196	14.8632	11.5689	2.28673	1.92888	3.8783	5.42786	5.81574	2.04383	22.9257	23.251	21.2658	3.605	4.65049	3.02403
820	15.7464	13.2359	14.4358	12.3913	11.0194	13.0469	21.8627	16.0023	14.6216	16.076	14.25	7.88758	8.9429	8.16027	9.87527	18.9539	16.5588	11.7171	9.51511	8.93644	12.656	25.667	38.5574	29.5924	23.9986	29.6933	28.2087	27.5712	17.8993	19.2733	14.8754	11.5635	2.26789	1.92532	3.84487	5.43717	5.80547	2.07011	22.9742	23.1765	21.2087	3.6068	4.60877	3.01711
821	15.6545	13.1584	14.3553	12.2069	11.0335	12.9103	21.7269	15.8243	14.5203	15.9764	14.244	7.87922	8.99106	8.1855	9.93598	18.9428	16.6411	11.7865	9.61164	8.97785	12.7062	25.6228	38.5753	29.5777	23.9794	29.5999	28.1627	27.5087	17.7894	19.2264	14.8875	11.5586	2.24903	1.9221	3.81035	5.44622	5.79449	2.09684	23.0191	23.1011	21.1526	3.60866	4.56514	3.01029
822	15.562	13.0819	14.2759	12.0285	11.05	12.7745	21.5905	15.6497	14.4178	15.8731	14.2358	7.8709	9.03903	8.21046	9.9987	18.9307	16.7204	11.854	9.70771	9.01889	12.7554	25.5774	38.5855	29.5556	23.9584	29.5046	28.118	27.4465	17.6808	19.1792	14.8993	11.5542	2.2302	1.9192	3.7748	5.455	5.7829	2.12409	23.0601	23.0247	21.0975	3.6106	4.51969	3.0036
823	15.4693	13.0062	14.1977	11.856	11.069	12.6395	21.4536	15.4786	14.3142	15.7664	14.2256	7.86253	9.08676	8.23514	10.0633	18.9173	16.7969	11.9195	9.80322	9.05962	12.8037	25.531	38.5883	29.5264	23.9355	29.4075	28.0745	27.3847	17.5733	19.1316	14.9108	11.5503	2.21144	1.91657	3.7383	5.46352	5.77078	2.15191	23.0969	22.9474	21.0436	3.6126	4.47252	2.99705
824	15.3765	12.9316	14.1207	11.6896	11.0903	12.5056	21.3162	15.3112	14.2098	15.6566	14.2131	7.85404	9.13419	8.25954	10.1295	18.9028	16.8704	11.9829	9.89807	9.10004	12.851	25.4838	38.5837	29.4902	23.9109	29.3087	28.0323	27.3232	17.4672	19.0837	14.922	11.5468	2.19278	1.91421	3.70093	5.47179	5.75823	2.18039	23.1294	22.8694	20.991	3.61467	4.42372	2.99067
825	15.2837	12.858	14.045	11.5291	11.114	12.3727	21.1783	15.1475	14.1046	15.5437	14.1985	7.84533	9.18127	8.28365	10.1972	18.8871	16.9411	12.0442	9.99218	9.14019	12.8974	25.4359	38.5719	29.4472	23.8844	29.2085	27.9914	27.2621	17.3625	19.0355	14.933	11.5437	2.17426	1.91207	3.66278	5.47983	5.74536	2.20959	23.1573	22.7906	20.9398	3.61681	4.37338	2.98448
826	15.1912	12.7853	13.9708	11.3745	11.1402	12.2411	21.0399	14.9876	13.9988	15.428	14.1817	7.83635	9.22793	8.30746	10.2662	18.8702	17.009	12.1034	10.0855	9.1801	12.9428	25.3875	38.5532	29.3976	23.8561	29.1069	27.9518	27.2015	17.2593	18.9871	14.9436	11.5411	2.1559	1.91014	3.62391	5.48765	5.73226	2.23958	23.1805	22.7112	20.8902	3.619	4.32161	2.97848
827	15.0992	12.7137	13.8982	11.2258	11.1687	12.1107	20.901	14.8315	13.8925	15.3097	14.1626	7.82702	9.27413	8.33097	10.3363	18.852	17.074	12.1604	10.1778	9.2198	12.9872	25.3388	38.5277	29.3416	23.826	29.0041	27.9135	27.1414	17.1578	18.9386	14.9539	11.5388	2.13775	1.90837	3.58442	5.4953	5.71903	2.27045	23.1987	22.6313	20.8424	3.62126	4.26851	2.97271
828	15.0077	12.643	13.8271	11.0829	11.1995	11.9818	20.7617	14.6794	13.7859	15.1891	14.1414	7.81728	9.3198	8.35418	10.4074	18.8326	17.1362	12.2152	10.2692	9.25931	13.0307	25.2899	38.4957	29.2794	23.7941	28.9003	27.8766	27.0818	17.0578	18.8901	14.964	11.5369	2.11981	1.90673	3.5444	5.50281	5.70576	2.30225	23.212	22.5509	20.7964	3.62355	4.21419	2.96717
829	14.917	12.5734	13.7579	10.9459	11.2326	11.8544	20.6219	14.5312	13.6791	15.0663	14.118	7.80709	9.3649	8.37709	10.4792	18.8119	17.1956	12.2679	10.3596	9.29867	13.0733	25.241	38.4573	29.2111	23.7605	28.7957	27.8411	27.0227	16.9597	18.8414	14.9737	11.5353	2.10211	1.9052	3.50394	5.51022	5.69254	2.33507	23.2201	22.4702	20.7524	3.62589	4.15876	2.96188
830	14.8272	12.5048	13.6904	10.8146	11.268	11.7286	20.4816	14.3869	13.5721	14.9417	14.0926	7.79639	9.40936	8.39969	10.5515	18.7899	17.2522	12.3184	10.4488	9.33791	13.1149	25.1922	38.4129	29.137	23.725	28.6905	27.8068	26.9642	16.8633	18.7928	14.9831	11.5341	2.08468	1.90373	3.46311	5.5176	5.67948	2.36899	23.2229	22.3892	20.7106	3.62825	4.10231	2.95686
831	14.7385	12.4372	13.6248	10.6891	11.3056	11.6045	20.3408	14.2467	13.4653	14.8153	14.065	7.78515	9.45315	8.422	10.6243	18.7666	17.306	12.3668	10.5369	9.37705	13.1556	25.1436	38.3625	29.0572	23.6879	28.5847	27.774	26.9062	16.7689	18.7442	14.9923	11.5332	2.06753	1.90229	3.42202	5.52499	5.66666	2.40407	23.2204	22.3081	20.671	3.63062	4.04497	2.95212
832	14.651	12.3706	13.5612	10.5692	11.3454	11.4821	20.1997	14.1104	13.3586	14.6876	14.0355	7.77333	9.49619	8.444	10.6972	18.7421	17.3571	12.4131	10.6237	9.41612	13.1954	25.0953	38.3066	28.9721	23.649	28.4787	27.7424	26.8489	16.6764	18.6957	15.0012	11.5326	2.05067	1.90084	3.38075	5.53246	5.65417	2.4404	23.2125	22.2268	20.6339	3.63298	3.98685	2.94767
833	14.565	12.3051	13.4996	10.4549	11.3872	11.3617	20.0581	13.978	13.2523	14.5586	14.0041	7.76092	9.53846	8.46571	10.7701	18.7163	17.4055	12.4572	10.7092	9.45515	13.2342	25.0476	38.2453	28.8817	23.6084	28.3725	27.7122	26.7923	16.5858	18.6474	15.0098	11.5324	2.03412	1.89936	3.33938	5.54008	5.64209	2.47805	23.1992	22.1456	20.5993	3.63532	3.92805	2.94351
834	14.4805	12.2406	13.44	10.3461	11.431	11.2432	19.916	13.8497	13.1463	14.4288	13.9708	7.7479	9.57988	8.48713	10.8428	18.6892	17.4512	12.4994	10.7934	9.49416	13.2722	25.0004	38.1788	28.7863	23.5662	28.2663	27.6833	26.7363	16.4973	18.5992	15.0182	11.5325	2.01789	1.89781	3.29802	5.54793	5.63051	2.51709	23.1804	22.0644	20.5675	3.63761	3.86869	2.93966
835	14.3976	12.1771	13.3826	10.2428	11.4768	11.1267	19.7735	13.7252	13.041	14.2983	13.9357	7.73426	9.62041	8.50826	10.9152	18.6609	17.4941	12.5395	10.8761	9.53317	13.3092	24.954	38.1074	28.6862	23.5223	28.1603	27.6556	26.681	16.4109	18.5512	15.0265	11.533	2.00197	1.89615	3.25674	5.55608	5.61949	2.55759	23.1561	21.9834	20.5384	3.63984	3.80887	2.93612
836	14.3166	12.1147	13.3274	10.145	11.5244	11.0123	19.6306	13.6046	12.9362	14.1674	13.8991	7.71999	9.66	8.5291	10.987	18.6315	17.5344	12.5777	10.9575	9.57222	13.3453	24.9083	38.0313	28.5814	23.4769	28.0547	27.6292	26.6264	16.3266	18.5033	15.0346	11.5338	1.98638	1.89435	3.21563	5.56462	5.60911	2.59962	23.1264	21.9027	20.5124	3.64198	3.74872	2.9329
837	14.2375	12.0533	13.2743	10.0525	11.5738	10.9001	19.4873	13.4878	12.8323	14.0362	13.8608	7.70509	9.6986	8.54966	11.0581	18.6008	17.572	12.6141	11.0374	9.61131	13.3806	24.8635	37.9509	28.4723	23.4299	27.9496	27.6039	26.5725	16.2445	18.4558	15.0426	11.535	1.97112	1.89238	3.17478	5.57363	5.59944	2.64324	23.0914	21.8223	20.4894	3.64399	3.68834	2.92999
838	14.1605	11.993	13.2235	9.96531	11.6248	10.7901	19.3436	13.3749	12.7292	13.9052	13.8212	7.68959	9.73615	8.56995	11.1283	18.5689	17.607	12.6487	11.1158	9.65048	13.4149	24.8196	37.8662	28.3589	23.3815	27.8453	27.5799	26.5194	16.1645	18.4084	15.0505	11.5366	1.95619	1.89021	3.13427	5.58319	5.59054	2.68852	23.051	21.7423	20.4697	3.64587	3.62784	2.9274
839	14.0856	11.9338	13.1748	9.88337	11.6774	10.6825	19.1996	13.2656	12.627	13.7745	13.7803	7.6735	9.77262	8.58996	11.1975	18.536	17.6393	12.6815	11.1926	9.68974	13.4484	24.7767	37.7777	28.2416	23.3316	27.7418	27.557	26.4671	16.0868	18.3614	15.0584	11.5387	1.94158	1.88781	3.09418	5.59341	5.58246	2.73552	23.0053	21.6629	20.4533	3.64757	3.56733	2.92512
840	14.0131	11.8757	13.1284	9.80661	11.7315	10.5771	19.0551	13.1601	12.5259	13.6444	13.7382	7.65684	9.80794	8.6097	11.2655	18.5019	17.6689	12.7128	11.2679	9.7291	13.481	24.7348	37.6855	28.1206	23.2804	27.6393	27.5352	26.4156	16.0112	18.3146	15.0662	11.5412	1.9273	1.88516	3.05459	5.60436	5.57527	2.78429	22.9545	21.584	20.4404	3.64907	3.50692	2.92315
841	13.9429	11.8186	13.0843	9.73499	11.7869	10.4742	18.9104	13.0581	12.426	13.5152	13.6951	7.63964	9.84208	8.62917	11.3322	18.4668	17.6958	12.7426	11.3416	9.76858	13.5127	24.694	37.5899	27.9959	23.228	27.538	27.5144	26.3649	15.9379	18.2681	15.0741	11.5442	1.91335	1.88223	3.01557	5.61615	5.56899	2.83487	22.8987	21.5057	20.431	3.65033	3.4467	2.92148
842	13.8752	11.7626	13.0423	9.66845	11.8436	10.3738	18.7653	12.9597	12.3272	13.3869	13.6511	7.62194	9.87497	8.64838	11.3974	18.4306	17.7201	12.7709	11.4137	9.80819	13.5436	24.6544	37.491	27.8679	23.1743	27.438	27.4947	26.315	15.8668	18.2218	15.0821	11.5477	1.89971	1.87899	2.9772	5.62887	5.56369	2.88732	22.8379	21.4282	20.4253	3.65133	3.38679	2.9201
843	13.8101	11.7077	13.0025	9.60693	11.9013	10.2759	18.6199	12.8648	12.2297	13.26	13.6064	7.60377	9.90659	8.66732	11.4611	18.3935	17.7418	12.7979	11.4842	9.84795	13.5735	24.6158	37.3893	27.7367	23.1196	27.3395	27.4759	26.266	15.7979	18.1759	15.0902	11.5517	1.88639	1.87543	2.93956	5.6426	5.55939	2.94167	22.7724	21.3514	20.4234	3.65204	3.32727	2.91899
844	13.7476	11.6539	12.9648	9.5504	11.9601	10.1805	18.4742	12.7733	12.1336	13.1346	13.561	7.58518	9.93688	8.68598	11.523	18.3554	17.7607	12.8238	11.553	9.88787	13.6026	24.5784	37.2848	27.6025	23.0638	27.2425	27.458	26.218	15.7312	18.1302	15.0985	11.5563	1.87337	1.87153	2.9027	5.65744	5.55612	2.99796	22.7022	21.2755	20.4252	3.65241	3.26825	2.91816
845	13.6878	11.6012	12.9292	9.4988	12.0198	10.0877	18.3283	12.6851	12.0388	13.011	13.5152	7.56622	9.9658	8.70438	11.583	18.3164	17.777	12.8486	11.6202	9.92794	13.6308	24.5421	37.1778	27.4656	23.0072	27.1474	27.441	26.1708	15.6668	18.0848	15.1069	11.5615	1.86066	1.86728	2.86671	5.67348	5.55391	3.0562	22.6277	21.2005	20.431	3.65242	3.20982	2.91757
846	13.6309	11.5496	12.8956	9.45208	12.0802	9.99746	18.1822	12.6002	11.9455	12.8893	13.4691	7.54694	9.9933	8.7225	11.6412	18.2765	17.7905	12.8724	11.6858	9.96819	13.6581	24.5069	37.0686	27.326	22.9497	27.054	27.4247	26.1246	15.6045	18.0397	15.1156	11.5674	1.84824	1.86265	2.83163	5.69081	5.55277	3.11643	22.5489	21.1264	20.4408	3.65204	3.15207	2.91723
847	13.5767	11.4991	12.864	9.41021	12.1412	9.9099	18.036	12.5184	11.8537	12.7699	13.4228	7.5274	10.0193	8.74033	11.6973	18.2357	17.8014	12.8953	11.7496	10.0086	13.6845	24.4728	36.9574	27.184	22.8915	26.9627	27.4093	26.0793	15.5444	17.9948	15.1246	11.5739	1.83612	1.85765	2.79753	5.70951	5.55273	3.17865	22.466	21.0534	20.4545	3.65124	3.09508	2.91709
848	13.5255	11.4498	12.8343	9.37315	12.2028	9.825	17.8897	12.4398	11.7633	12.6528	13.3765	7.50765	10.0439	8.75787	11.7513	18.1942	17.8095	12.9176	11.8117	10.0492	13.71	24.4398	36.8443	27.0397	22.8327	26.8734	27.3945	26.035	15.4865	17.9502	15.1339	11.5811	1.82428	1.85227	2.76448	5.72966	5.55378	3.24288	22.3793	20.9814	20.4724	3.64998	3.03894	2.91716
849	13.4772	11.4015	12.8064	9.34086	12.2648	9.74278	17.7433	12.3643	11.6745	12.5383	13.3303	7.48775	10.0669	8.77511	11.8031	18.1519	17.8148	12.9393	11.8722	10.0899	13.7346	24.4077	36.7296	26.8934	22.7735	26.7863	27.3803	25.9917	15.4306	17.9058	15.1436	11.5891	1.81272	1.8465	2.73251	5.75133	5.55593	3.3091	22.289	20.9104	20.4943	3.64824	2.98372	2.91741
850	13.4319	11.3544	12.7803	9.3133	12.327	9.66324	17.5969	12.2918	11.5873	12.4266	13.2844	7.46778	10.0884	8.79204	11.8526	18.1088	17.8174	12.9604	11.9309	10.1309	13.7583	24.3766	36.6136	26.7452	22.7139	26.7015	27.3668	25.9495	15.3769	17.8616	15.1536	11.5978	1.80143	1.84034	2.7017	5.77461	5.55919	3.37731	22.1953	20.8407	20.5203	3.64598	2.9295	2.91781
851	13.3897	11.3084	12.7557	9.29043	12.3893	9.58639	17.4506	12.2222	11.5016	12.3179	13.2389	7.44779	10.1082	8.80863	11.8998	18.0651	17.8171	12.9813	11.988	10.172	13.781	24.3463	36.4963	26.5953	22.6542	26.6191	27.3538	25.9084	15.3252	17.8175	15.164	11.6074	1.79042	1.8338	2.67208	5.79956	5.56354	3.44749	22.0984	20.7721	20.5505	3.6432	2.87635	2.91834
852	13.3504	11.2636	12.7327	9.27223	12.4517	9.51223	17.3044	12.1554	11.4175	12.2123	13.1939	7.42785	10.1264	8.82488	11.9447	18.0207	17.8141	13.0019	12.0433	10.2132	13.8027	24.3169	36.378	26.4438	22.5943	26.5392	27.3413	25.8683	15.2754	17.7737	15.1749	11.6177	1.77968	1.82689	2.6437	5.82623	5.56897	3.51962	21.9986	20.7047	20.5847	3.63985	2.82432	2.91899
853	13.3142	11.2199	12.711	9.25866	12.514	9.44076	17.1584	12.0915	11.335	12.1099	13.1496	7.40803	10.143	8.84075	11.9872	17.9756	17.8082	13.0224	12.0969	10.2546	13.8235	24.2881	36.2588	26.2909	22.5346	26.4618	27.3292	25.8293	15.2276	17.73	15.1862	11.6289	1.76922	1.8196	2.61661	5.85468	5.57547	3.59366	21.8961	20.6386	20.6231	3.63592	2.77349	2.91972
854	13.2811	11.1773	12.6907	9.24969	12.5761	9.37196	17.0126	12.0304	11.254	12.011	13.106	7.38838	10.1578	8.85625	12.0272	17.9299	17.7995	13.0429	12.1487	10.2961	13.8433	24.26	36.139	26.1367	22.475	26.3871	27.3175	25.7915	15.1818	17.6864	15.1979	11.641	1.75902	1.81196	2.59085	5.88497	5.58302	3.66957	21.7911	20.5738	20.6655	3.63139	2.7239	2.92053
855	13.2511	11.1359	12.6715	9.24529	12.6378	9.30582	16.8673	11.972	11.1747	11.9157	13.0633	7.36899	10.171	8.87132	12.0649	17.8836	17.7879	13.0636	12.1988	10.3378	13.862	24.2324	36.0188	25.9815	22.4158	26.315	27.3062	25.7549	15.1377	17.643	15.2102	11.6539	1.7491	1.80399	2.56646	5.91712	5.5916	3.7473	21.684	20.5103	20.7119	3.62625	2.67561	2.92137
856	13.2241	11.0956	12.6533	9.24542	12.6992	9.24231	16.7224	11.9163	11.0968	11.8241	13.0217	7.34992	10.1824	8.88596	12.1	17.8367	17.7733	13.0844	12.2472	10.3795	13.8797	24.2052	35.8981	25.8254	22.3572	26.2456	27.2951	25.7195	15.0955	17.5996	15.223	11.6678	1.73945	1.79569	2.54348	5.95119	5.60118	3.82679	21.5749	20.4481	20.7623	3.62049	2.62865	2.92223
857	13.2002	11.0564	12.636	9.25005	12.76	9.18142	16.578	11.8633	11.0205	11.7363	12.981	7.33123	10.192	8.90014	12.1327	17.7893	17.7559	13.1057	12.2938	10.4214	13.8963	24.1783	35.7773	25.6684	22.2992	26.1791	27.2844	25.6853	15.055	17.5564	15.2362	11.6826	1.73009	1.7871	2.52194	5.98718	5.61174	3.90798	21.4641	20.3874	20.8165	3.61408	2.58307	2.92309
858	13.1793	11.0184	12.6195	9.25916	12.8201	9.12311	16.4342	11.8128	10.9457	11.6525	12.9416	7.31299	10.2	8.91382	12.163	17.7413	17.7355	13.1274	12.3386	10.4633	13.9118	24.1515	35.6565	25.5108	22.242	26.1153	27.2738	25.6524	15.0161	17.5132	15.2499	11.6983	1.72101	1.77825	2.50187	6.02512	5.62324	3.99079	21.3519	20.328	20.8746	3.60704	2.5389	2.92393
859	13.1614	10.9814	12.6037	9.2727	12.8795	9.06735	16.2912	11.765	10.8724	11.5726	12.9034	7.29526	10.2061	8.92697	12.1909	17.6928	17.7122	13.1496	12.3817	10.5053	13.9262	24.1248	35.5358	25.3527	22.1858	26.0545	27.2635	25.6208	14.9789	17.4701	15.2642	11.715	1.71222	1.76914	2.4833	6.06502	5.63564	4.07515	21.2385	20.27	20.9363	3.59936	2.49617	2.92472
860	13.1465	10.9456	12.5883	9.29064	12.9382	9.01409	16.149	11.7197	10.8005	11.4969	12.8664	7.2781	10.2105	8.93956	12.2163	17.6438	17.6858	13.1725	12.423	10.5473	13.9394	24.098	35.4153	25.1942	22.1308	25.9965	27.2534	25.5905	14.9432	17.427	15.2789	11.7326	1.70374	1.75983	2.46627	6.10688	5.64893	4.16095	21.1242	20.2134	21.0016	3.59104	2.45491	2.92545
861	13.1346	10.911	12.5733	9.31294	12.9959	8.96329	16.0077	11.677	10.73	11.4253	12.8309	7.26157	10.2131	8.95155	12.2394	17.5942	17.6565	13.1961	12.4625	10.5893	13.9514	24.071	35.2952	25.0355	22.077	25.9414	27.2433	25.5615	14.909	17.384	15.2941	11.7512	1.69558	1.75035	2.45079	6.1507	5.66305	4.24811	21.0091	20.1584	21.0704	3.58209	2.41513	2.9261
862	13.1256	10.8774	12.5585	9.33956	13.0526	8.9149	15.8675	11.6368	10.6609	11.3579	12.7967	7.24573	10.2139	8.96291	12.2602	17.5441	17.6243	13.2205	12.5002	10.6313	13.9622	24.0436	35.1756	24.8767	22.0247	25.8893	27.2334	25.534	14.8763	17.341	15.3098	11.7707	1.68774	1.74073	2.4369	6.19645	5.67798	4.33652	20.8936	20.1048	21.1424	3.57252	2.37684	2.92665
863	13.1194	10.8449	12.5439	9.37045	13.1083	8.86886	15.7284	11.5991	10.5932	11.2949	12.7639	7.23063	10.213	8.9736	12.2787	17.4935	17.589	13.2457	12.5361	10.6732	13.9717	24.0157	35.0565	24.7179	21.9741	25.8402	27.2237	25.5079	14.8449	17.2981	15.3259	11.7911	1.68024	1.73101	2.4246	6.24411	5.69367	4.42607	20.7779	20.0527	21.2176	3.56234	2.34006	2.92709
864	13.1161	10.8135	12.5292	9.40557	13.1629	8.82513	15.5907	11.564	10.5268	11.2361	12.7326	7.21633	10.2103	8.98359	12.295	17.4424	17.5507	13.272	12.5702	10.7151	13.98	23.9871	34.9381	24.5592	21.9252	25.794	27.214	25.4832	14.8148	17.2552	15.3423	11.8125	1.6731	1.72123	2.41393	6.29364	5.71009	4.51664	20.6621	20.0022	21.2959	3.55157	2.30479	2.9274
865	13.1155	10.7831	12.5143	9.44486	13.2163	8.78364	15.4543	11.5314	10.4616	11.1816	12.7027	7.20288	10.2059	8.99283	12.3092	17.3907	17.5094	13.2992	12.6025	10.7569	13.9868	23.9578	34.8205	24.4008	21.8782	25.7508	27.2043	25.46	14.7859	17.2123	15.3592	11.8348	1.66632	1.71144	2.40489	6.34502	5.72719	4.60812	20.5466	19.9532	21.3769	3.54024	2.27102	2.92758
866	13.1176	10.7538	12.4992	9.48827	13.2685	8.74433	15.3195	11.5014	10.3976	11.1314	12.6742	7.19032	10.1998	9.00128	12.3213	17.3385	17.4652	13.3275	12.6329	10.7985	13.9924	23.9275	34.7037	24.2427	21.8333	25.7105	27.1948	25.4384	14.7582	17.1695	15.3764	11.858	1.65993	1.70169	2.39751	6.39817	5.74494	4.70037	20.4316	19.9057	21.4605	3.52838	2.23875	2.92761
867	13.1224	10.7255	12.4837	9.53573	13.3194	8.70714	15.1864	11.4739	10.3349	11.0855	12.6472	7.17869	10.1919	9.0089	12.3313	17.2857	17.418	13.3569	12.6615	10.8399	13.9965	23.896	34.5878	24.0851	21.7906	25.6732	27.1853	25.4184	14.7316	17.1268	15.394	11.8821	1.65394	1.69202	2.3918	6.45305	5.7633	4.79327	20.3172	19.8599	21.5465	3.51601	2.20797	2.9275
868	13.1296	10.6983	12.4677	9.58719	13.3691	8.67199	15.0551	11.4489	10.2733	11.044	12.6215	7.16805	10.1825	9.01566	12.3394	17.2323	17.3678	13.3874	12.6883	10.8811	13.9992	23.8634	34.4729	23.9281	21.7503	25.6388	27.1759	25.4	14.706	17.0842	15.4118	11.907	1.64838	1.68248	2.38777	6.50959	5.78222	4.88669	20.2036	19.8157	21.6348	3.50317	2.17867	2.92722
869	13.1394	10.672	12.4511	9.64256	13.4174	8.63881	14.9257	11.4266	10.2128	11.0066	12.5971	7.15842	10.1714	9.02151	12.3457	17.1784	17.3147	13.419	12.7132	10.9221	14.0004	23.8293	34.3591	23.7718	21.7124	25.6073	27.1665	25.3832	14.6814	17.0417	15.4298	11.9327	1.64325	1.67313	2.38542	6.56771	5.80169	4.98047	20.0911	19.7731	21.725	3.48991	2.15082	2.92679
870	13.1515	10.6467	12.4338	9.70178	13.4643	8.60754	14.7984	11.4069	10.1534	10.9735	12.5741	7.14984	10.1587	9.02642	12.3502	17.1238	17.2588	13.4519	12.7363	10.9628	14.0001	23.7938	34.2463	23.6162	21.6772	25.5787	27.1573	25.3681	14.6577	16.9993	15.448	11.9592	1.63858	1.66401	2.38477	6.62732	5.82165	5.07449	19.9799	19.7321	21.817	3.47625	2.12441	2.9262
871	13.1659	10.6223	12.4158	9.76475	13.5099	8.57811	14.6732	11.3898	10.095	10.9445	12.5522	7.14233	10.1445	9.03035	12.353	17.0686	17.1999	13.486	12.7575	11.0032	13.9983	23.7565	34.1347	23.4615	21.6448	25.5529	27.1481	25.3548	14.6349	16.9571	15.4663	11.9865	1.63439	1.65519	2.38582	6.68834	5.84209	5.1686	19.8701	19.6929	21.9105	3.46227	2.0994	2.92545
872	13.1826	10.5989	12.3969	9.83139	13.5541	8.55043	14.5504	11.3754	10.0377	10.9196	12.5314	7.13594	10.1287	9.03326	12.3542	17.0127	17.1382	13.5212	12.7769	11.0432	13.9949	23.7174	34.0243	23.3078	21.6152	25.53	27.139	25.3432	14.6129	16.9152	15.4847	12.0145	1.63068	1.6467	2.38857	6.75067	5.86295	5.26266	19.762	19.6553	22.0052	3.44799	2.07576	2.92456
873	13.2013	10.5764	12.3772	9.90161	13.5969	8.52444	14.4301	11.3637	9.98131	10.8987	12.5117	7.13068	10.1116	9.03512	12.3539	16.9561	17.0738	13.5577	12.7943	11.0828	13.99	23.6764	33.915	23.1552	21.5886	25.5099	27.1301	25.3335	14.5916	16.8734	15.5031	12.0432	1.62749	1.63862	2.39302	6.81421	5.88422	5.35652	19.6556	19.6195	22.101	3.43348	2.05347	2.92352
874	13.2221	10.5547	12.3565	9.9753	13.6384	8.50006	14.3124	11.3548	9.92591	10.8816	12.4929	7.12658	10.0931	9.03588	12.3523	16.8987	17.0066	13.5953	12.81	11.1219	13.9834	23.6333	33.8069	23.0037	21.5652	25.4925	27.1212	25.3257	14.5709	16.8319	15.5215	12.0724	1.62483	1.63099	2.39917	6.87884	5.90586	5.45004	19.5511	19.5854	22.1975	3.41879	2.03249	2.92234
875	13.2448	10.5339	12.3348	10.0524	13.6784	8.47722	14.1975	11.3486	9.87145	10.8684	12.475	7.12365	10.0732	9.03553	12.3492	16.8406	16.9367	13.6342	12.8237	11.1606	13.9753	23.588	33.7	22.8535	21.5449	25.4778	27.1126	25.3198	14.5509	16.7908	15.5398	12.1023	1.6227	1.62388	2.40701	6.94444	5.92785	5.54307	19.4488	19.5531	22.2944	3.40398	2.01277	2.92104
876	13.2692	10.514	12.3121	10.1327	13.7171	8.45585	14.0854	11.3452	9.8179	10.8588	12.4577	7.1219	10.0521	9.03403	12.345	16.7817	16.8643	13.6742	12.8356	11.1987	13.9654	23.5404	33.5944	22.7045	21.5279	25.4657	27.1041	25.3158	14.5315	16.75	15.5579	12.1327	1.62114	1.61733	2.41654	7.01091	5.95016	5.63548	19.3487	19.5225	22.3916	3.38912	1.99428	2.91963
877	13.2954	10.4948	12.2884	10.2161	13.7545	8.43588	13.9764	11.3448	9.76527	10.8528	12.4411	7.12136	10.0298	9.03135	12.3397	16.722	16.7893	13.7153	12.8456	11.2362	13.954	23.4903	33.4899	22.557	21.5143	25.4563	27.0958	25.3139	14.5126	16.7096	15.5758	12.1635	1.62015	1.6114	2.42775	7.07811	5.97277	5.72712	19.251	19.4938	22.4887	3.37426	1.97697	2.91811
878	13.3232	10.4764	12.2637	10.3026	13.7906	8.41723	13.8704	11.3472	9.71353	10.8501	12.4248	7.12202	10.0064	9.02747	12.3333	16.6614	16.7118	13.7575	12.8538	11.2732	13.9408	23.4377	33.3867	22.4109	21.5041	25.4494	27.0878	25.314	14.4942	16.6697	15.5935	12.1948	1.61974	1.60614	2.44061	7.14591	5.99566	5.81786	19.1558	19.467	22.5854	3.35947	1.9608	2.91652
879	13.3524	10.4587	12.238	10.3919	13.8253	8.39985	13.7678	11.3525	9.66268	10.8507	12.4089	7.1239	9.98193	9.02236	12.326	16.5999	16.632	13.8008	12.8602	11.3094	13.926	23.3825	33.2846	22.2664	21.4974	25.4449	27.08	25.3163	14.4762	16.6303	15.6108	12.2264	1.61993	1.60162	2.45513	7.21418	6.01881	5.90757	19.0632	19.442	22.6815	3.34481	1.94571	2.91487
880	13.3831	10.4418	12.2113	10.4839	13.8588	8.38366	13.6685	11.3609	9.61273	10.8544	12.3931	7.127	9.95651	9.016	12.3178	16.5375	16.5498	13.8451	12.8647	11.3449	13.9095	23.3246	33.1836	22.1235	21.4942	25.4429	27.0725	25.3207	14.4586	16.5914	15.6277	12.2583	1.62073	1.59787	2.47127	7.28279	6.04221	5.99612	18.9734	19.4189	22.7766	3.33036	1.93167	2.91316
881	13.4149	10.4256	12.1837	10.5786	13.8911	8.36861	13.5728	11.3722	9.56367	10.861	12.3774	7.13131	9.93021	9.00838	12.3088	16.4741	16.4655	13.8903	12.8675	11.3797	13.8913	23.2638	33.0838	21.9823	21.4947	25.4433	27.0653	25.3273	14.4414	16.5532	15.6442	12.2905	1.62213	1.59496	2.48901	7.3516	6.06584	6.08338	18.8864	19.3978	22.8706	3.31618	1.91861	2.91144
882	13.4479	10.41	12.1552	10.6757	13.9222	8.35463	13.4807	11.3867	9.51552	10.8704	12.3614	7.13683	9.90311	8.99949	12.2992	16.4097	16.379	13.9364	12.8684	11.4137	13.8714	23.2002	32.9851	21.8428	21.4988	25.4459	27.0584	25.3362	14.4244	16.5156	15.6602	12.3228	1.62415	1.59293	2.50833	7.42047	6.08968	6.16924	18.8024	19.3785	22.9631	3.30233	1.9065	2.9097
883	13.482	10.3951	12.1259	10.775	13.9522	8.34166	13.3924	11.4042	9.46828	10.8823	12.3452	7.14356	9.87531	8.9893	12.289	16.3443	16.2906	13.9835	12.8676	11.4469	13.8499	23.1337	32.8873	21.7051	21.5065	25.4508	27.0519	25.3474	14.4077	16.4787	15.6756	12.3552	1.62679	1.59184	2.52921	7.48926	6.11373	6.25359	18.7214	19.3613	23.0538	3.28888	1.89528	2.90799
884	13.5169	10.3808	12.0958	10.8765	13.9811	8.32966	13.3079	11.4249	9.42198	10.8966	12.3285	7.15149	9.84687	8.97782	12.2782	16.2778	16.2002	14.0313	12.8651	11.4792	13.8267	23.0642	32.7906	21.5693	21.5179	25.4578	27.0458	25.361	14.3913	16.4426	15.6903	12.3877	1.63005	1.59172	2.5516	7.55783	6.13798	6.33631	18.6435	19.346	23.1425	3.27591	1.88489	2.90631
885	13.5526	10.3672	12.0651	10.98	14.0089	8.31857	13.2273	11.4488	9.37664	10.913	12.3111	7.1606	9.8179	8.96503	12.267	16.2102	16.1081	14.0798	12.8609	11.5105	13.8019	22.9916	32.6947	21.4354	21.533	25.4669	27.0401	25.3769	14.375	16.4073	15.7045	12.4201	1.63393	1.59263	2.57548	7.62605	6.16242	6.41733	18.5689	19.3327	23.2289	3.26347	1.8753	2.90469
886	13.589	10.3541	12.0339	11.0853	14.0358	8.30834	13.1509	11.4759	9.33229	10.9315	12.293	7.17088	9.78849	8.95094	12.2554	16.1415	16.0143	14.129	12.855	11.5409	13.7755	22.916	32.5998	21.3035	21.5518	25.478	27.0348	25.3953	14.3589	16.3728	15.7178	12.4525	1.63842	1.5946	2.60081	7.69378	6.18705	6.49654	18.4975	19.3214	23.3127	3.25162	1.86644	2.90315
887	13.626	10.3416	12.0023	11.1922	14.0617	8.29894	13.0785	11.5063	9.28895	10.9517	12.2738	7.18231	9.75872	8.93555	12.2436	16.0717	15.9189	14.1788	12.8475	11.5703	13.7475	22.8373	32.5055	21.1736	21.5742	25.491	27.0301	25.4162	14.3429	16.3393	15.7305	12.4847	1.64351	1.59767	2.62754	7.76088	6.21185	6.57386	18.4294	19.3121	23.3937	3.24044	1.85826	2.90171
888	13.6634	10.3297	11.9703	11.3005	14.0867	8.29033	13.0104	11.5399	9.24667	10.9735	12.2536	7.19488	9.72869	8.91886	12.2314	16.0006	15.8221	14.2291	12.8385	11.5987	13.718	22.7555	32.412	21.0459	21.6003	25.5059	27.0258	25.4396	14.3271	16.3066	15.7423	12.5166	1.6492	1.60189	2.65563	7.82721	6.23684	6.64922	18.3648	19.3049	23.4716	3.22997	1.85073	2.90039
889	13.7011	10.3184	11.9382	11.4101	14.1108	8.28246	12.9467	11.5769	9.20548	10.9966	12.2321	7.20855	9.69848	8.90088	12.2191	15.9284	15.724	14.2799	12.8279	11.626	13.6869	22.6706	32.3192	20.9202	21.6299	25.5225	27.022	25.4656	14.3113	16.275	15.7532	12.5482	1.65548	1.60729	2.68504	7.89266	6.26199	6.72256	18.3036	19.2997	23.5461	3.22028	1.84378	2.89921
890	13.7391	10.3076	11.9061	11.5208	14.1342	8.27532	12.8873	11.6172	9.16543	11.0208	12.2091	7.2233	9.66819	8.88162	12.2066	15.855	15.6248	14.3311	12.8158	11.6522	13.6544	22.5827	32.2268	20.7968	21.6632	25.5408	27.0187	25.4942	14.2955	16.2443	15.7633	12.5795	1.66232	1.61389	2.71571	7.9571	6.28733	6.79383	18.2459	19.2966	23.6172	3.21142	1.83738	2.89819
891	13.7772	10.2974	11.8742	11.6325	14.1568	8.26887	12.8324	11.6608	9.12656	11.0459	12.1846	7.2391	9.6379	8.8611	12.1941	15.7803	15.5245	14.3826	12.8023	11.6773	13.6205	22.4917	32.135	20.6755	21.6999	25.5607	27.0159	25.5254	14.2798	16.2147	15.7724	12.6103	1.66972	1.62174	2.74758	8.0204	6.31283	6.86296	18.1917	19.2956	23.6844	3.20344	1.83147	2.89735
892	13.8153	10.2877	11.8426	11.7449	14.1787	8.2631	12.782	11.7078	9.08894	11.0718	12.1583	7.25592	9.6077	8.83933	12.1815	15.7044	15.4233	14.4344	12.7875	11.7012	13.5852	22.3976	32.0434	20.5566	21.74	25.582	27.0137	25.5592	14.2641	16.1861	15.7805	12.6405	1.67765	1.63085	2.78061	8.08245	6.33851	6.92994	18.141	19.2966	23.7476	3.19638	1.82601	2.8967
893	13.8533	10.2786	11.8114	11.8578	14.2	8.25797	12.7361	11.7582	9.05261	11.098	12.1302	7.27373	9.57768	8.81634	12.1688	15.6273	15.3213	14.4864	12.7713	11.724	13.5486	22.3006	31.9522	20.4399	21.7835	25.6048	27.0121	25.5957	14.2484	16.1586	15.7877	12.6702	1.68608	1.64125	2.81473	8.14314	6.36436	6.99472	18.0939	19.2996	23.8066	3.1903	1.82097	2.89625
894	13.8912	10.27	11.781	11.9711	14.2206	8.25349	12.6949	11.812	9.01763	11.1246	12.1	7.29248	9.54792	8.79214	12.1562	15.5489	15.2187	14.5385	12.7539	11.7456	13.5107	22.2006	31.8612	20.3257	21.8303	25.6289	27.011	25.6349	14.2326	16.1322	15.7938	12.6992	1.69501	1.65295	2.84987	8.20236	6.39039	7.0573	18.0504	19.3047	23.8612	3.18523	1.81629	2.89602
895	13.9288	10.262	11.7514	12.0846	14.2407	8.24963	12.6584	11.8692	8.98405	11.1511	12.0678	7.31214	9.5185	8.76676	12.1437	15.4693	15.1156	14.5906	12.7354	11.766	13.4717	22.0978	31.7702	20.2138	21.8802	25.6543	27.0105	25.6768	14.2168	16.1068	15.7989	12.7274	1.70439	1.66598	2.88598	8.26002	6.41659	7.11765	18.0105	19.3118	23.9113	3.1812	1.81194	2.89602
896	13.9661	10.2546	11.7228	12.1981	14.2602	8.2464	12.6266	11.9297	8.95195	11.1775	12.0333	7.33267	9.4895	8.74023	12.1312	15.3884	15.0122	14.6428	12.7157	11.7851	13.4317	21.9922	31.6793	20.1043	21.9333	25.6807	27.0106	25.7213	14.201	16.0825	15.8029	12.7548	1.7142	1.68035	2.92299	8.31603	6.44297	7.17579	17.9742	19.321	23.9565	3.17825	1.80789	2.89624
897	14.0029	10.2478	11.6954	12.3115	14.2793	8.24379	12.5995	11.9936	8.92138	11.2034	11.9966	7.35401	9.46099	8.71258	12.1187	15.3063	14.9087	14.6949	12.695	11.8031	13.3906	21.8839	31.5882	19.9973	21.9894	25.7082	27.0112	25.7686	14.185	16.0593	15.8059	12.7813	1.72441	1.69606	2.96082	8.37029	6.46952	7.23172	17.9414	19.3321	23.9969	3.1764	1.80409	2.89671
898	14.0392	10.2416	11.6695	12.4245	14.2978	8.2418	12.5771	12.0609	8.89241	11.2287	11.9574	7.37613	9.43305	8.68384	12.1064	15.223	14.805	14.7469	12.6733	11.8198	13.3485	21.773	31.497	19.8929	22.0484	25.7367	27.0124	25.8185	14.1689	16.0371	15.8078	12.8068	1.73499	1.71312	2.99941	8.42274	6.49625	7.28546	17.9122	19.3452	24.0322	3.17567	1.80053	2.89741
899	14.075	10.2361	11.6452	12.537	14.3159	8.24044	12.5595	12.1315	8.8651	11.2532	11.9157	7.39896	9.40573	8.65405	12.0941	15.1385	14.7015	14.7987	12.6508	11.8353	13.3056	21.6596	31.4054	19.7909	22.1101	25.7661	27.0141	25.8711	14.1528	16.0159	15.8085	12.8312	1.74589	1.73153	3.03867	8.4733	6.52315	7.33703	17.8866	19.3603	24.0623	3.17609	1.79716	2.89835
900	14.1101	10.2313	11.6228	12.6488	14.3336	8.23971	12.5467	12.2054	8.83952	11.2767	11.8715	7.42246	9.3791	8.62324	12.082	15.0528	14.5981	14.8503	12.6275	11.8496	13.262	21.5437	31.3135	19.6915	22.1745	25.7961	27.0164	25.9262	14.1365	15.9958	15.8082	12.8545	1.7571	1.7513	3.07854	8.52192	6.55022	7.38646	17.8644	19.3773	24.0871	3.17765	1.79397	2.89953
901	14.1445	10.2271	11.6023	12.7598	14.3509	8.23962	12.5386	12.2826	8.81574	11.299	11.8247	7.44656	9.35321	8.59146	12.0699	14.966	14.4952	14.9016	12.6034	11.8627	13.2177	21.4257	31.2211	19.5948	22.2414	25.8269	27.0192	25.984	14.1201	15.9766	15.8067	12.8766	1.76856	1.77241	3.11893	8.56854	6.57747	7.43381	17.8457	19.3961	24.1066	3.18037	1.79093	2.90093
902	14.1781	10.2237	11.584	12.8698	14.3678	8.24019	12.5353	12.3631	8.7938	11.3198	11.7752	7.47121	9.32812	8.55873	12.0579	14.878	14.3928	14.9527	12.5787	11.8747	13.1728	21.3054	31.1281	19.5006	22.3107	25.8583	27.0224	26.0443	14.1036	15.9583	15.8042	12.8974	1.78025	1.79486	3.15978	8.61312	6.60489	7.47912	17.8305	19.4168	24.1205	3.18425	1.788	2.90255
903	14.211	10.2211	11.5681	12.9787	14.3842	8.24143	12.5367	12.4467	8.77379	11.3391	11.723	7.49635	9.30386	8.52511	12.046	14.789	14.2911	15.0033	12.5534	11.8854	13.1275	21.1832	31.0344	19.4091	22.3822	25.8901	27.0262	26.1071	14.087	15.9408	15.8006	12.9168	1.79212	1.81864	3.201	8.65562	6.63247	7.52243	17.8186	19.4393	24.1288	3.18929	1.78519	2.90439
904	14.243	10.2193	11.5548	13.0862	14.4004	8.24337	12.5428	12.5334	8.75575	11.3566	11.6681	7.52192	9.28049	8.49064	12.0341	14.699	14.1901	15.0536	12.5276	11.8951	13.0818	21.0592	30.9401	19.3203	22.4558	25.9223	27.0304	26.1723	14.0703	15.9242	15.7958	12.9348	1.80413	1.84373	3.24251	8.696	6.66022	7.56382	17.81	19.4635	24.1316	3.19547	1.78247	2.90642
905	14.2741	10.2184	11.5443	13.1923	14.4161	8.24602	12.5537	12.6232	8.73976	11.3722	11.6106	7.54784	9.25803	8.45537	12.0223	14.608	14.0901	15.1035	12.5015	11.9036	13.0359	20.9335	30.8449	19.2342	22.5314	25.9549	27.035	26.2399	14.0534	15.9083	15.79	12.9513	1.81625	1.87011	3.28423	8.73426	6.68812	7.60336	17.8047	19.4894	24.1287	3.20277	1.77981	2.90862
906	14.3044	10.2184	11.5366	13.2968	14.4315	8.24941	12.5692	12.716	8.72585	11.3856	11.5504	7.57404	9.23651	8.41933	12.0105	14.5161	13.9912	15.1529	12.475	11.9111	12.9898	20.8062	30.7488	19.1507	22.6088	25.9876	27.04	26.3097	14.0365	15.893	15.7832	12.9662	1.82844	1.89775	3.32609	8.77038	6.71618	7.64111	17.8025	19.5169	24.1201	3.2112	1.77723	2.91098
907	14.3337	10.2193	11.532	13.3995	14.4464	8.25356	12.5893	12.8117	8.71409	11.3969	11.4875	7.60046	9.21595	8.38257	11.9986	14.4233	13.8935	15.2018	12.4483	11.9176	12.9437	20.6776	30.6518	19.0701	22.6879	26.0204	27.0453	26.3817	14.0195	15.8784	15.7753	12.9795	1.84064	1.92664	3.368	8.80434	6.74439	7.67715	17.8033	19.546	24.1058	3.2207	1.77469	2.91348
908	14.362	10.2213	11.5307	13.5005	14.461	8.25849	12.614	12.9103	8.70452	11.4058	11.422	7.62702	9.19637	8.34516	11.9867	14.3297	13.7971	15.2503	12.4214	11.9231	12.8977	20.5478	30.5538	18.9921	22.7685	26.0533	27.051	26.4557	14.0023	15.8642	15.7663	12.991	1.85284	1.95674	3.40989	8.83617	6.77273	7.71156	17.8072	19.5765	24.0857	3.23127	1.7722	2.9161
909	14.3895	10.2243	11.5328	13.5994	14.4752	8.26424	12.6433	13.0116	8.69719	11.4122	11.3539	7.65365	9.17777	8.30712	11.9747	14.2355	13.7022	15.2982	12.3944	11.9277	12.8518	20.417	30.4547	18.917	22.8504	26.0862	27.0569	26.5317	13.9851	15.8505	15.7564	13.0007	1.86497	1.98803	3.45168	8.86586	6.80121	7.74443	17.8139	19.6084	24.06	3.24286	1.76976	2.91879
910	14.416	10.2285	11.5384	13.6963	14.4889	8.27083	12.677	13.1155	8.69214	11.4161	11.2833	7.68026	9.16016	8.26852	11.9626	14.1405	13.6089	15.3455	12.3674	11.9315	12.8063	20.2853	30.3544	18.8446	22.9335	26.1188	27.063	26.6095	13.9679	15.8371	15.7455	13.0085	1.87702	2.02045	3.4933	8.89343	6.8298	7.77584	17.8234	19.6416	24.0286	3.25544	1.76735	2.92155
911	14.4415	10.2338	11.5476	13.791	14.5022	8.2783	12.7151	13.222	8.68939	11.4172	11.2103	7.70678	9.14353	8.2294	11.9503	14.0451	13.5174	15.3923	12.3405	11.9345	12.7612	20.153	30.2531	18.775	23.0176	26.1513	27.0693	26.6891	13.9507	15.8239	15.7337	13.0144	1.88894	2.05398	3.53467	8.91892	6.85852	7.80588	17.8356	19.6761	23.9915	3.26897	1.76497	2.92434
912	14.4661	10.2404	11.5606	13.8834	14.515	8.28667	12.7576	13.3309	8.68899	11.4155	11.135	7.73313	9.12787	8.18981	11.9378	13.9491	13.4276	15.4386	12.3137	11.9368	12.7166	20.0203	30.1505	18.7082	23.1027	26.1835	27.0758	26.7701	13.9334	15.8109	15.7209	13.0183	1.9007	2.08858	3.57572	8.94234	6.88734	7.83464	17.8503	19.7117	23.9489	3.2834	1.76264	2.92712
913	14.4899	10.2483	11.5774	13.9735	14.5273	8.29597	12.8044	13.4421	8.69096	11.411	11.0575	7.75923	9.11316	8.14982	11.9251	13.8528	13.3398	15.4842	12.2871	11.9385	12.6726	19.8873	30.0468	18.6442	23.1884	26.2153	27.0823	26.8526	13.9162	15.7979	15.7072	13.0201	1.91226	2.12419	3.61638	8.96373	6.91625	7.86221	17.8673	19.7484	23.9007	3.29868	1.76034	2.92987
914	14.5127	10.2576	11.5982	14.0611	14.5391	8.30624	12.8553	13.5555	8.6953	11.4035	10.9779	7.78499	9.09939	8.10946	11.912	13.7562	13.254	15.5293	12.2607	11.9396	12.6294	19.7543	29.9418	18.583	23.2747	26.2466	27.0888	26.9363	13.8991	15.7849	15.6927	13.0198	1.92359	2.16077	3.65659	8.98314	6.94525	7.88868	17.8866	19.786	23.8471	3.31475	1.7581	2.93256
915	14.5347	10.2682	11.623	14.1462	14.5503	8.3175	12.9104	13.671	8.70204	11.3931	10.8964	7.81033	9.08652	8.0688	11.8987	13.6594	13.1704	15.5738	12.2347	11.9403	12.5871	19.6214	29.8356	18.5246	23.3614	26.2774	27.0954	27.0211	13.8821	15.7716	15.6773	13.0173	1.93466	2.19828	3.69628	9.00061	6.97432	7.91413	17.908	19.8245	23.7881	3.33158	1.7559	2.93514
916	14.5559	10.2803	11.6519	14.2287	14.5609	8.32979	12.9695	13.7883	8.71118	11.3796	10.813	7.83516	9.07451	8.02788	11.885	13.5626	13.089	15.6177	12.2091	11.9406	12.5457	19.4888	29.7282	18.469	23.4484	26.3076	27.1018	27.1068	13.8653	15.7582	15.6611	13.0125	1.94543	2.23666	3.73539	9.0162	7.00346	7.93867	17.9314	19.8637	23.7238	3.34908	1.75376	2.93759
917	14.5764	10.294	11.685	14.3085	14.5709	8.34314	13.0325	13.9074	8.7227	11.3631	10.7279	7.85939	9.06333	7.98677	11.8709	13.4658	13.01	15.6611	12.1839	11.9406	12.5055	19.3567	29.6196	18.4162	23.5355	26.3371	27.1081	27.1932	13.8486	15.7443	15.6442	13.0054	1.9559	2.27585	3.77386	9.02995	7.03265	7.96237	17.9565	19.9036	23.6543	3.36721	1.7517	2.93987
918	14.5961	10.3092	11.7222	14.3857	14.5803	8.35757	13.0994	14.0281	8.73661	11.3435	10.6413	7.88295	9.05294	7.94552	11.8563	13.3691	12.9334	15.7038	12.1592	11.9404	12.4664	19.2253	29.5098	18.3661	23.6225	26.3659	27.1142	27.2802	13.8323	15.7301	15.6265	12.996	1.96602	2.3158	3.81163	9.04192	7.06188	7.98531	17.9833	19.944	23.5798	3.3859	1.74971	2.94194
919	14.6152	10.3261	11.7637	14.4601	14.5889	8.37312	13.1701	14.1502	8.75289	11.3209	10.5534	7.90575	9.04327	7.90418	11.8412	13.2727	12.8593	15.746	12.1351	11.9402	12.4286	19.0949	29.3988	18.3188	23.7093	26.394	27.1201	27.3675	13.8162	15.7152	15.6082	12.9842	1.97578	2.35645	3.84867	9.05219	7.09115	8.00758	18.0115	19.9848	23.5003	3.40509	1.74781	2.94378
920	14.6336	10.3447	11.8093	14.5317	14.5968	8.38982	13.2444	14.2736	8.7715	11.2952	10.4643	7.9277	9.03429	7.8628	11.8256	13.1767	12.7879	15.7875	12.1115	11.94	12.3922	18.9655	29.2867	18.2742	23.7959	26.4212	27.1256	27.4549	13.8005	15.6997	15.5892	12.97	1.98516	2.39774	3.88492	9.0608	7.12043	8.02925	18.041	20.0259	23.4159	3.42471	1.74602	2.94535
921	14.6515	10.365	11.8592	14.6005	14.604	8.40769	13.3222	14.398	8.79242	11.2665	10.3742	7.94871	9.02593	7.82146	11.8093	13.0812	12.7191	15.8285	12.0886	11.9399	12.3573	18.8374	29.1735	18.2323	23.8819	26.4475	27.1308	27.5422	13.7852	15.6835	15.5695	12.9532	1.99415	2.43961	3.92033	9.06782	7.14973	8.05039	18.0715	20.0672	23.3269	3.44469	1.74435	2.94662
922	14.669	10.3871	11.9132	14.6665	14.6104	8.42676	13.4035	14.5234	8.8156	11.2347	10.2833	7.96871	9.01813	7.7802	11.7925	12.9863	12.653	15.869	12.0663	11.94	12.3239	18.7108	29.0593	18.193	23.9673	26.4729	27.1356	27.6293	13.7705	15.6664	15.5493	12.934	2.00273	2.48199	3.95487	9.07332	7.17903	8.07108	18.103	20.1086	23.2333	3.46496	1.7428	2.94755
923	14.6861	10.4111	11.9714	14.7296	14.6159	8.44706	13.4881	14.6494	8.841	11.2	10.1918	7.9876	9.01082	7.73908	11.7749	12.8922	12.5897	15.9088	12.0447	11.9404	12.2922	18.5858	28.9442	18.1564	24.052	26.4973	27.1399	27.7159	13.7563	15.6485	15.5285	12.9122	2.0109	2.52483	3.98851	9.07736	7.20831	8.09136	18.1352	20.1499	23.1354	3.48545	1.74141	2.94813
924	14.7028	10.4369	12.0337	14.7899	14.6206	8.46862	13.5759	14.776	8.86857	11.1625	10.1	8.00532	9.00394	7.69817	11.7567	12.799	12.5293	15.9481	12.0239	11.9413	12.2623	18.4626	28.8282	18.1224	24.1358	26.5208	27.1437	27.8019	13.7428	15.6296	15.5072	12.8879	2.01864	2.56805	4.02122	9.08001	7.23759	8.11131	18.1678	20.1911	23.0332	3.50611	1.74017	2.94832
925	14.7192	10.4646	12.1	14.8473	14.6244	8.49145	13.6667	14.9029	8.89823	11.1221	10.0079	8.02177	8.99743	7.65751	11.7376	12.7067	12.4718	15.9869	12.0037	11.9427	12.2341	18.3414	28.7114	18.091	24.2187	26.5432	27.1469	27.8869	13.73	15.6096	15.4854	12.861	2.02596	2.61159	4.05296	9.08133	7.26683	8.13098	18.2008	20.2319	22.9268	3.52684	1.73912	2.94811
926	14.7355	10.4943	12.1704	14.9018	14.6274	8.51558	13.7605	15.0299	8.92991	11.0789	9.9159	8.03689	8.9912	7.61717	11.7178	12.6157	12.4172	16.0251	11.9844	11.9447	12.2079	18.2224	28.5938	18.0621	24.3004	26.5645	27.1495	27.9708	13.718	15.5885	15.4631	12.8315	2.03285	2.65538	4.08372	9.08139	7.29604	8.1504	18.234	20.2724	22.8166	3.5476	1.73825	2.94746
927	14.7518	10.526	12.2446	14.9535	14.6294	8.54103	13.8572	15.1569	8.96355	11.0331	9.82409	8.05059	8.9852	7.5772	11.6972	12.5259	12.3655	16.0627	11.9658	11.9475	12.1836	18.1056	28.4757	18.0356	24.3809	26.5848	27.1514	28.0534	13.7069	15.5663	15.4405	12.7994	2.03932	2.69936	4.11349	9.08025	7.32522	8.16962	18.267	20.3123	22.7026	3.56831	1.7376	2.94636
928	14.768	10.5596	12.3227	15.0024	14.6305	8.56782	13.9564	15.2835	8.99905	10.9847	9.73272	8.0628	8.97935	7.53767	11.6757	12.4375	12.3169	16.0998	11.948	11.9512	12.1613	17.9913	28.357	18.0115	24.4602	26.604	27.1525	28.1345	13.6968	15.5429	15.4174	12.7646	2.04538	2.74346	4.14223	9.07797	7.35434	8.18868	18.2998	20.3515	22.585	3.5889	1.73716	2.94479
929	14.7842	10.5953	12.4044	15.0484	14.6306	8.59597	14.0583	15.4097	9.03631	10.9339	9.64199	8.07346	8.97357	7.49864	11.6533	12.3506	12.2713	16.1363	11.931	11.9557	12.1411	17.8796	28.2379	17.9897	24.538	26.6221	27.1529	28.214	13.6877	15.5183	15.394	12.7274	2.05104	2.78761	4.16996	9.0746	7.38341	8.20759	18.332	20.39	22.464	3.60931	1.73698	2.94274
930	14.8007	10.633	12.4898	15.0916	14.6298	8.6255	14.1625	15.5352	9.07525	10.8807	9.55211	8.08249	8.96781	7.46015	11.63	12.2654	12.2288	16.1723	11.9147	11.9613	12.1231	17.7706	28.1186	17.9702	24.6143	26.6391	27.1525	28.2915	13.6798	15.4925	15.3703	12.6875	2.0563	2.83174	4.19666	9.0702	7.41242	8.22639	18.3636	20.4276	22.3397	3.62948	1.73704	2.9402
931	14.8174	10.6728	12.5786	15.132	14.6281	8.65642	14.269	15.6597	9.11576	10.8254	9.46328	8.08984	8.96199	7.42228	11.6057	12.182	12.1893	16.2078	11.8993	11.968	12.1072	17.6644	27.999	17.9528	24.689	26.655	27.1512	28.3669	13.6731	15.4653	15.3464	12.6451	2.0612	2.87579	4.22234	9.06483	7.44136	8.24509	18.3943	20.4641	22.2124	3.64934	1.73738	2.93716
932	14.8344	10.7146	12.6708	15.1697	14.6254	8.68875	14.3775	15.7832	9.15772	10.7679	9.37571	8.09545	8.95605	7.38509	11.5805	12.1005	12.1529	16.2427	11.8847	11.9759	12.0935	17.5612	27.8793	17.9376	24.7621	26.6698	27.149	28.4401	13.6678	15.4369	15.3222	12.6001	2.06576	2.91968	4.24699	9.05851	7.47024	8.26369	18.424	20.4996	22.0822	3.66884	1.73801	2.93362
933	14.8519	10.7584	12.7661	15.2047	14.6217	8.7225	14.488	15.9053	9.20103	10.7086	9.28958	8.09925	8.94992	7.34862	11.5542	12.021	12.1195	16.277	11.8708	11.9851	12.082	17.461	27.7597	17.9245	24.8334	26.6835	27.1459	28.5108	13.6638	15.4073	15.2977	12.5527	2.06999	2.96336	4.27062	9.05131	7.49904	8.2822	18.4523	20.5338	21.9493	3.68793	1.73893	2.92958
934	14.8698	10.8043	12.8646	15.237	14.6172	8.75767	14.6003	16.0258	9.24555	10.6474	9.20509	8.10119	8.94354	7.31293	11.5269	11.9437	12.0891	16.3107	11.8577	11.9956	12.0728	17.364	27.6402	17.9132	24.903	26.6961	27.1418	28.579	13.6614	15.3764	15.2731	12.5028	2.07392	3.00675	4.29324	9.04326	7.52776	8.30062	18.4792	20.5667	21.8138	3.70654	1.74017	2.92504
935	14.8884	10.8522	12.9659	15.2666	14.6117	8.79428	14.7142	16.1446	9.29116	10.5846	9.12242	8.10124	8.93686	7.27809	11.4986	11.8687	12.0618	16.3439	11.8453	12.0075	12.0658	17.2703	27.521	17.9038	24.9707	26.7077	27.1368	28.6444	13.6606	15.3442	15.2483	12.4505	2.0776	3.0498	4.31487	9.0344	7.5564	8.31894	18.5044	20.5981	21.6761	3.72463	1.74174	2.92002
936	14.9076	10.9021	13.07	15.2937	14.6054	8.83234	14.8296	16.2614	9.33774	10.5203	9.04176	8.09934	8.92982	7.24415	11.4692	11.7961	12.0375	16.3765	11.8337	12.0208	12.0611	17.1799	27.4022	17.8962	25.0364	26.7183	27.1308	28.7069	13.6614	15.3109	15.2235	12.3958	2.08105	3.09244	4.33552	9.02475	7.58495	8.33714	18.5278	20.628	21.5362	3.74215	1.74366	2.91451
937	14.9276	10.954	13.1767	15.3183	14.5982	8.87185	14.9462	16.3761	9.38515	10.4547	8.96326	8.09546	8.92237	7.21116	11.4388	11.7259	12.0161	16.4085	11.8228	12.0357	12.0587	17.0928	27.2839	17.8903	25.1003	26.7279	27.1238	28.7665	13.664	15.2765	15.1985	12.3389	2.08432	3.1346	4.35522	9.01434	7.61341	8.3552	18.5492	20.6562	21.3943	3.75907	1.74592	2.90853
938	14.9485	11.0078	13.2859	15.3403	14.5902	8.91281	15.0639	16.4884	9.43325	10.388	8.88709	8.08956	8.91447	7.17917	11.4072	11.6583	11.9977	16.4399	11.8126	12.0521	12.0586	17.0093	27.1663	17.8859	25.1621	26.7366	27.1158	28.8229	13.6685	15.2409	15.1734	12.2798	2.08745	3.17624	4.37398	9.00319	7.64178	8.37311	18.5684	20.6827	21.2507	3.77533	1.74856	2.90211
939	14.9702	11.0635	13.3973	15.3599	14.5814	8.95522	15.1826	16.5981	9.48191	10.3202	8.8134	8.08162	8.90609	7.14824	11.3746	11.5934	11.9822	16.4707	11.8031	12.0701	12.0607	16.9292	27.0494	17.883	25.2219	26.7444	27.1067	28.8762	13.6749	15.2043	15.1484	12.2185	2.09047	3.21728	4.39183	8.99132	7.67005	8.39083	18.5852	20.7074	21.1055	3.7909	1.75156	2.89526
940	14.993	11.1211	13.5108	15.3771	14.5719	8.9991	15.302	16.7052	9.53098	10.2516	8.74232	8.0716	8.89717	7.11841	11.3408	11.5313	11.9695	16.5009	11.7942	12.0898	12.0651	16.8526	26.9334	17.8814	25.2796	26.7512	27.0967	28.9262	13.6833	15.1667	15.1233	12.1552	2.09345	3.25767	4.40879	8.97875	7.69821	8.40833	18.5995	20.7303	20.9589	3.80576	1.75496	2.88801
941	15.0168	11.1804	13.6262	15.3919	14.5616	9.04443	15.422	16.8093	9.58033	10.1823	8.674	8.05951	8.88771	7.08973	11.306	11.4721	11.9597	16.5303	11.7859	12.111	12.0717	16.7796	26.8183	17.8811	25.3353	26.7573	27.0857	28.9728	13.6937	15.1283	15.0982	12.09	2.09643	3.29736	4.4249	8.96547	7.72626	8.42557	18.6111	20.7511	20.8112	3.81987	1.75875	2.88038
942	15.0417	11.2416	13.7434	15.4045	14.5508	9.09121	15.5424	16.9103	9.62981	10.1126	8.60855	8.04531	8.87767	7.06224	11.27	11.4158	11.9525	16.5592	11.7782	12.1338	12.0804	16.7102	26.7043	17.882	25.3889	26.7626	27.0737	29.016	13.7063	15.0891	15.0732	12.0229	2.09946	3.33629	4.44018	8.9515	7.7542	8.44252	18.62	20.7699	20.6624	3.83322	1.76294	2.87241
943	15.0678	11.3044	13.8622	15.4148	14.5394	9.13944	15.6629	17.0081	9.67927	10.0425	8.54608	8.029	8.86704	7.03598	11.2329	11.3625	11.948	16.5873	11.771	12.1583	12.0913	16.6443	26.5915	17.8839	25.4404	26.7671	27.0607	29.0558	13.7211	15.0492	15.0483	11.9541	2.10261	3.37442	4.45467	8.93683	7.78202	8.45913	18.6259	20.7866	20.5129	3.84577	1.76755	2.86413
944	15.0952	11.3688	13.9825	15.4229	14.5274	9.18911	15.7835	17.1025	9.72858	9.97234	8.48668	8.01058	8.85581	7.01099	11.1947	11.3122	11.9461	16.6147	11.7644	12.1844	12.1043	16.582	26.4799	17.8867	25.4898	26.771	27.0468	29.0921	13.7381	15.0086	15.0235	11.8836	2.10593	3.41169	4.4684	8.92147	7.80971	8.47536	18.6287	20.8011	20.3627	3.85752	1.77257	2.85557
945	15.124	11.4348	14.1039	15.4289	14.515	9.24021	15.9038	17.1933	9.7776	9.90215	8.43043	7.99005	8.84398	6.98731	11.1554	11.2651	11.9468	16.6414	11.7582	12.212	12.1193	16.5232	26.3697	17.8903	25.5372	26.7743	27.032	29.125	13.7575	14.9676	14.9988	11.8117	2.10948	3.44805	4.48141	8.9054	7.83726	8.49117	18.6284	20.8135	20.2122	3.86845	1.77802	2.84677
946	15.154	11.5022	14.2265	15.4329	14.5023	9.29273	16.0238	17.2805	9.82618	9.83215	8.37741	7.96742	8.83155	6.96496	11.115	11.2212	11.9498	16.6673	11.7525	12.2412	12.1363	16.468	26.2609	17.8946	25.5824	26.7771	27.0163	29.1545	13.7791	14.9263	14.9742	11.7384	2.11333	3.48346	4.49372	8.88861	7.86466	8.5065	18.6248	20.8236	20.0614	3.87855	1.78389	2.83778
947	15.1856	11.571	14.35	15.4348	14.4892	9.34666	16.1432	17.3638	9.87419	9.76249	8.32767	7.94271	8.81853	6.94396	11.0735	11.1804	11.9552	16.6925	11.7472	12.272	12.1552	16.4162	26.1535	17.8996	25.6256	26.7793	26.9998	29.1805	13.8031	14.8846	14.9498	11.6639	2.11754	3.51789	4.50538	8.8711	7.89191	8.52132	18.6178	20.8314	19.9107	3.88783	1.7902	2.82863
948	15.2185	11.6411	14.4742	15.4348	14.4759	9.40199	16.2618	17.4433	9.92149	9.69333	8.28126	7.91593	8.80493	6.92434	11.0309	11.1429	11.9629	16.7169	11.7423	12.3041	12.176	16.3679	26.0477	17.905	25.6667	26.7812	26.9826	29.2032	13.8295	14.8429	14.9257	11.5882	2.12218	3.55128	4.51641	8.85285	7.91898	8.53557	18.6073	20.8369	19.7601	3.89629	1.79694	2.81938
949	15.253	11.7123	14.5991	15.4328	14.4625	9.45869	16.3795	17.5187	9.96796	9.62484	8.23821	7.8871	8.79078	6.90612	10.9872	11.1086	11.9727	16.7405	11.7377	12.3377	12.1985	16.323	25.9435	17.9108	25.7057	26.7826	26.9646	29.2226	13.8582	14.8011	14.9017	11.5116	2.12731	3.58361	4.52686	8.83383	7.94588	8.54921	18.5933	20.8402	19.61	3.90392	1.80413	2.81006
[truncated: 651 more rows]
[truncated: 59 more columns]

## Sheet: fig2b
population	rDSI-delay mean	rDSI-delay 2.5%	rDSI-delay 97.5%	rCTI-delay mean	rCTI-delay 2.5%	rCTI-delay 97.5%
[truncated: 8 more rows]

## Sheet: fig4a
Monkey B - ranks	no category/direction trial LL mean	no category/direction ste	category only trial LL mean	category only ste	category and cosine direction tuning trial LL mean	category and cosine direction tuning ste	full model trial LL mean	full model ste		Monkey J - ranks	no category/direction trial LL mean	no category/direction ste	category only trial LL mean	category only ste	category and cosine direction tuning trial LL mean	category and cosine direction tuning ste	full model trial LL mean	full model ste		Monkey D-discrimination - ranks	no category/direction trial LL mean	no category/direction ste	category only trial LL mean	category only ste	category and cosine direction tuning trial LL mean	category and cosine direction tuning ste	full model trial LL mean	full model ste		Monkey D-early - ranks	no category/direction trial LL mean	no category/direction ste	category only trial LL mean	category only ste	category and cosine direction tuning trial LL mean	category and cosine direction tuning ste	full model trial LL mean	full model ste		Monkey D-late - ranks	no category/direction trial LL mean	no category/direction ste	category only trial LL mean	category only ste	category and cosine direction tuning trial LL mean	category and cosine direction tuning ste	full model trial LL mean	full model ste
[truncated: 12 more rows]
[truncated: 27 more columns]

[truncated: 50 more sheets: fig5, fig6a, fig6b, fig7b, fig8b, fig9a, fig9b, fig9c, fig10b, fig10c, fig10d, sfig1delay, sfig1sample, sfig1tuning, sfig2adelay, sfig2asample, sfig2atuning, sfig2b, sfig3j, sfig4a …]
